# Supplementary material for: Quantitative Proteomics Reveals Cellular Targets of Celastrol
Source: PLoS One. 2011 Oct 26;6(10):e26634. doi: 10.1371/journal.pone.0026634 (PMC3202559; doi:10.1371/journal.pone.0026634)
Supplement: Table S1 — All quantified cellular proteins. This table lists the treated/untreated quantitative ratios for all 2765 different proteins quantified in at least one of three replicated cellular proteome experiments. (XLS) [file pone.0026634.s004.xls]

## Sheet: S1.All cellular
Table S1. All 2765 proteins quantified in 3 (designated D, E, and F) cellular proteome experiments
Gene Names	Protein Descriptions	Uniprot	Ratio H/L Normalized D	Ratio H/L Normalized E	Ratio H/L Normalized F
HMOX1;HO;HO1;CTA-286B10.6-002	Heme oxygenase 1;Heme oxygenase (Decycling) 1	P09601;B2R7U4;Q6FH11;Q96DI8;B1AHA8	20.376	33.046	21.707
	cDNA FLJ54408, highly similar to Heat shock 70 kDa protein 1	B4DFN9;B4E3B6	6.9533
HSPA1A;HSPA1;HSPA1B;DAAP-21F2.8-002;DADB-333F21.4-002;DAQB-147D11.2-002;XXbac-BCX40G17.4-002;XXbac-BPG254B15.2-002	Heat shock 70 kDa protein 1;cDNA FLJ54392, highly similar to Heat shock 70 kDa protein 1;cDNA FLJ54407, highly similar to Heat shock 70 kDa protein 1;cDNA FLJ54389, highly similar to Heat shock 70 kDa protein 1;cDNA FLJ53752, highly similar to Heat shock 70 kDa protein 1	P08107;A8K5I0;B4DI39;B4E1S9;Q9UQC1;B4DNT8;B4DWK5;Q59EJ3;B4E388;B3KTT5;B4DVU9;Q5SP16;B4DNX1;B4E1T6	6.6484	6.999	6.5219
VPS28	Vacuolar protein sorting-associated protein 28 homolog;23 kDa protein;vacuolar protein sorting 28 isoform 2;21 kDa protein;22 kDa protein;14 kDa protein	Q9UK41;Q548N1;Q86VK0	5.6697	11.798	1.7483
HMGCL	Putative uncharacterized protein HMGCL	A6NMQ0		2.0491	7.5906
	similar to Peptidase D				4.4192
	FP944	Q71RE8		3.5306
TMEM126A	Transmembrane protein 126A	Q9H061;B2R570	3.7922	5.2902	1.2265
SPTBN4;KIAA1642;SPTBN3	Isoform 1 of Spectrin beta chain, brain 3;Isoform 3 of Spectrin beta chain, brain 3;Isoform 4 of Spectrin beta chain, brain 3;Isoform 2 of Spectrin beta chain, brain 3	Q9H254-1;Q9H254;Q71S07;Q9H254-3;Q9H254-4;Q71S06;Q9H254-2			3.2892
SLC2A14;GLUT14;GLUT3;SLC2A3	Isoform 1 of Solute carrier family 2, facilitated glucose transporter member 14;Isoform 2 of Solute carrier family 2, facilitated glucose transporter member 14;Solute carrier family 2, facilitated glucose transporter member 3;54 kDa protein;Solute carrier family 2 (Facilitated glucose transporter), member 3 variant (Fragment)	Q8TDB8-1;Q8TDB8;B3KWW7;Q8TDB8-2;B3KVB5;P11169;B2R606;Q59F54			3.2617
MED4;ARC36;DRIP36;VDRIP;HSPC126;RP11-90M2.2-003	Mediator of RNA polymerase II transcription subunit 4;Mediator of RNA polymerase II transcription, subunit 4 homolog;cDNA FLJ50738, highly similar to Mediator complex subunit 4	Q9NPJ6;Q5T911;B4DX67		2.7416
RFC4;hCG_2021077	Replication factor C subunit 4;cDNA FLJ60688, highly similar to Replication factor C subunit 4	P35249;B4DM41	4.704		0.70702
LAPTM5;KIAA0085	Lysosomal-associated transmembrane protein 5	Q13571;Q3KP54;Q5TBB8		2.601
VARS2;KIAA1885;VARS2L;VARSL;DAQB-11J22.1-002	cDNA FLJ55611, highly similar to Homo sapiens valyl-tRNA synthetase like (VARSL), mRNA;cDNA FLJ59483, highly similar to Homo sapiens valyl-tRNA synthetase like (VARSL), mRNA;cDNA FLJ56191, highly similar to Homo sapiens valyl-tRNA synthetase like (VARSL), mRNA;Isoform 1 of Valyl-tRNA synthetase, mitochondrial;cDNA, FLJ96840, highly similar to Homo sapiens valyl-tRNA synthetase 2-like (VARS2L), mR…	B4E3P5;B4DET4;B4E0K6;Q5ST30-1;Q5ST30;B2RDZ1;Q5SQ95;Q5ST30-2;Q9H6B7	3.2414	1.5817	2.6974
FTH1;FTH;FTHL6;OK/SW-cl.84;PIG15	Ferritin heavy chain	P02794;A9JQE1;B3KNR5;B3KXC3;Q6NS36;Q6NZ44	2.1174	2.3736	3.0244
CTSD;CPSD	Cathepsin D;Protein;33 kDa protein;30 kDa protein;21 kDa protein	P07339	2.5068	2.2904	2.6973
WAPAL;FOE;KIAA0261;WAPL	Isoform 3 of Wings apart-like protein homolog;Isoform 2 of Wings apart-like protein homolog;Isoform 1 of Wings apart-like protein homolog	Q7Z5K2-3;Q7Z5K2;B3Y1W5;Q7Z5K2-2;Q7Z5K2-1;A7E2B5;A8K273;B2RTX8;B3Y1W2			2.4222
TMEM205;UNQ501/PRO1018	Transmembrane protein 205	Q6UW68	2.2514	2.1315	2.2377
	14 kDa protein		2.1286
LAMP2;hCG_39412	Isoform LAMP-2B of Lysosome-associated membrane glycoprotein 2;lysosomal-associated membrane protein 2 isoform C precursor;Isoform LAMP-2A of Lysosome-associated membrane glycoprotein 2;cDNA FLJ52535, highly similar to Homo sapiens lysosomal-associated membrane protein 2 (LAMP2), transcript variant LAMP2B, mRNA	P13473-2;P13473;B4E2S7;Q9UD93;Q6Q3G8;P13473-1;A8K4X5;B4DF49	2.8723	1.6713	1.8117
CLPTM1L;CRR9	Isoform 1 of Cleft lip and palate transmembrane protein 1-like protein;Isoform 2 of Cleft lip and palate transmembrane protein 1-like protein	Q96KA5-1;Q96KA5;Q96KA5-2;B3KY18	1.6168	2.6113
C7orf50;FP15621	Uncharacterized protein C7orf50;Protein;19 kDa protein	Q9BRJ6		2.0579
PSAP;RP11-472K8.1-002;GLBA;SAP1	Prosaposin;Isoform Sap-mu-9 of Proactivator polypeptide;Prosaposin variant;Isoform Sap-mu-6 of Proactivator polypeptide;Isoform Sap-mu-0 of Proactivator polypeptide;PSAP protein	B1AVU8;P07602-3;P07602;B4DEK5;B4DRB7;O75905;Q59EN5;P07602-2;Q53FJ5;P07602-1;Q53Y86;Q5BJH1		1.9099	2.2032
FTL;FTL variant	Ferritin;Ferritin light polypeptide variant (Fragment)	P02792;B1Q387;B1Q3B3;B2R4B9;O00563;Q4FCH6;Q6DMM8;Q6IBT7;Q6NW17;Q6S4P3;Q86WI9;Q8WU07;Q96AU9;Q96CU0;B1Q3B4	1.8802	1.7353	2.5406
CLPTM1	Isoform 1 of Cleft lip and palate transmembrane protein 1;Isoform 2 of Cleft lip and palate transmembrane protein 1	O96005-1;O96005;B4DDS3;B4E2X9;O96005-2;B3KQH2	2.0505
ITGA6	Isoform Alpha-6X1X2B of Integrin alpha-6;Isoform Alpha-6X1X2A of Integrin alpha-6;Isoform Alpha-6X1B of Integrin alpha-6;Isoform Alpha-6X2B of Integrin alpha-6;Isoform Alpha-6X1A of Integrin alpha-6;Isoform Alpha-6X2A of Integrin alpha-6	P23229-1;P23229;P23229-6;P23229-3;B2RMU9;Q0MRC7;Q59HB7;P23229-5;P23229-2;Q53RX7;P23229-4;B4DG69;B4DKB8;Q86VL6;Q9UCT1			2.0305
IGKV4-1	Similar to Ig kappa chain V-IV region precursor;Ig kappa chain V-IV region B17;Ig kappa chain V-IV region JI;Ig kappa chain V-IV region Len;Microfibrillar protein 2 (Fragment)	P06312;P06314;P06313;P01625;Q9NP29		2.0275
UCHL1;hCG_33087	Ubiquitin carboxyl-terminal hydrolase isozyme L1;Ubiquitin carboxyl-terminal esterase L1 (Ubiquitin thiolesterase), isoform CRA_a	P09936;B2RD14;Q4W5K6;A6NKP9	1.7355	2.1207	2.1337
PDCD4;H731	Programmed cell death protein 4;programmed cell death 4 isoform 2	Q53EL6;B2R6E2;B2RCV4;B4DKX4;B5ME91	1.9691	1.8998	2.1182
ERAP1;APPILS;ARTS1;KIAA0525;UNQ584/PRO1154	Isoform 2 of Endoplasmic reticulum aminopeptidase 1;Isoform 1 of Endoplasmic reticulum aminopeptidase 1	Q9NZ08-2;Q9NZ08;A8K6H1;Q9NZ08-1;Q53GQ8	2.1654	1.8343	1.9018
CUL4A	Isoform 1 of Cullin-4A;Isoform 2 of Cullin-4A	Q13619-1;Q13619;A2A2W2;A8MSH7;B2RBV7;Q13619-2;B4DKT2	3.6897	1.2371	0.96875
POMP;C13orf12;UMP1;HSPC014;HSPC036;PNAS-110	Proteasome maturation protein	Q9Y244	2.0429	1.8364	1.9248
SSR4;TRAPD	Translocon-associated protein subunit delta precursor;Putative uncharacterized protein SSR4;Protein	P51571;A8K378;A6NLM8	2.0794	1.7799	1.9284
HSPB1;HSP27;HSP28	Heat shock protein beta-1;cDNA FLJ52243, highly similar to Heat-shock protein beta-1	P04792;B2R4N8;B4DL87	1.7842	2.0393	1.9531
SPCS1;SPC12;HSPC033	signal peptidase complex subunit 1 homolog;9 kDa protein	Q9Y6A9;B3KNF8	2.8335	1.5053	1.4365
UGCGL1;GT;UGGT;UGT1;UGTR	UDP-glucose ceramide glucosyltransferase-like 1 isoform 1;UDP-glucose:glycoprotein glucosyltransferase 1	A8KAK1;Q9NYU2	2.0972	1.7613	1.8947
SELT;UNQ150/PRO176;hCG_20913	Selenoprotein T;SELT protein	P62341;B4DTQ5;Q6IAK0	2.1126	1.8069	1.8292
IQGAP3	Ras GTPase-activating-like protein IQGAP3	Q86VI3;A2RRC9;Q5T3H8		1.9142
GANAB;G2AN;KIAA0088	Isoform 2 of Neutral alpha-glucosidase AB	Q14697-2;Q14697;B4DZ53	2.0734	1.7521	1.8349
BST2	cDNA FLJ59809, highly similar to Bone marrow stromal antigen 2;Bone marrow stromal antigen 2	B4E0Z6;Q10589;A8K4Y4	1.9347	1.8977	1.8227
TXNDC4;ERP44;KIAA0573;UNQ532/PRO1075	Thioredoxin domain-containing protein 4	Q9BS26	2.0201	1.8591	1.7675
GOLT1B;GOT1A;CGI-141;HDCMA39P;UNQ432/PRO793	Vesicle transport protein GOT1B;7 kDa protein	Q9Y3E0;B2R4R4		1.8839	1.874
HBEBP2BPA;MPDU1;hCG_42012	HBeAg-binding protein 2 binding protein A;cDNA FLJ57743, highly similar to Mannose-P-dolichol utilization defect 1 protein;Mannose-P-dolichol utilization defect 1 protein;My008 protein;cDNA FLJ57749, highly similar to Mannose-P-dolichol utilization defect 1 protein;cDNA FLJ14836 fis, clone OVARC1001702;cDNA FLJ57793, moderately similar to Mannose-P-dolichol utilization defect 1 protein	Q1HDL3;B4DLH7;O75352;B2RB74;B3KQP1;B4DTB4;Q9BUU8;Q9H3L2;B4DMY7;Q96N63;Q96K24;B4DT74	2.0853	1.6849	1.8595
PACAP;HSPC190	Isoform 1 of Proapoptotic caspase adapter protein	Q8WU39-1;Q8WU39;B3KQ72	1.9782	1.6415	2.0057
SLC2A1;GLUT1	Solute carrier family 2, facilitated glucose transporter member 1;Putative uncharacterized protein SLC2A1 (Fragment);cDNA FLJ55703, highly similar to Solute carrier family 2, facilitated glucose transporter member 1;27 kDa protein	P11166;A8K9S6;B2R620;B3KVN0;B4DDR6;Q0P512;Q59GX2;A8MWM7;B4DKW1		1.9183	1.8305
LMAN1;ERGIC53;F5F8D	Protein ERGIC-53	P49257;A0PJ85;B2R774;B4DVV0;Q53FS4	2.0743	1.6286	1.9133
GM2A	Ganglioside GM2 activator	P17900;B2R699;B4DQM5;Q14427;Q6LBL5	1.9472	1.926	1.7159
TMED10;TMP21	Transmembrane emp24 domain-containing protein 10;cDNA FLJ53754, highly similar to Transmembrane emp24 domain-containing protein 10	P49755;B2R605;B4DZH3;Q53GF9;B4DL12	1.9823	1.6384	1.9194
STT3A;ITM1;TMC	Dolichyl-diphosphooligosaccharide--protein glycosyltransferase subunit STT3A	P46977;B4DJ24	2.0405	1.7329	1.7559
HSP90B1;TRA1	Endoplasmin;cDNA FLJ58626, highly similar to Endoplasmin	P14625;B4DHT9;Q59FC6;Q5CAQ5;Q96GW1;B4DU71	1.9932	1.7312	1.8011
CNPY2;MSAP;TMEM4;ZSIG9;UNQ1943/PRO4426	Isoform 1 of Protein canopy homolog 2;11 kDa protein	Q9Y2B0-1;Q9Y2B0;B2R7B9	1.8902	1.6427	1.9779
C19orf10;IL25	UPF0556 protein C19orf10	Q969H8	2.0292	1.5985	1.8753
TMED2;RNP24	Transmembrane emp24 domain-containing protein 2;cDNA FLJ52153, highly similar to Transmembrane emp24 domain-containing protein 2;cDNA FLJ52154, moderately similar to Transmembrane emp24 domain-containing protein 2	Q15363;Q6FHT8;B4DP27;B4E020	1.9743	1.5688	1.9514
CD22;SIGLEC2	Isoform CD22-beta of B-cell receptor CD22;Isoform CD22-alpha of B-cell receptor CD22;CD22 protein	P20273-1;P20273;Q0EAF5;Q32M46;P20273-2;Q9UQB1;Q9UQB2;O60926	2.0017	1.2782	2.2057
MT-ATP6;ATP6;ATPASE6;MTATP6	ATP synthase subunit a;ATP synthase F0 subunit 6	P00846;A0S0T0;A0S0Z5;A0S1G1;A0S2B3;A0S2H8;A0S2R9;A0S2V8;A0S3K5;A0S3X2;A0S437;A0S525;A0S590;A0SB36;A0SBS0;A0SBX2;A0SCX3;A1DTA5;A1DTI3;A1DV99;A1DVF1;A1E1E3;A1E1T6;A1Z496;A1Z4E8;A1Z4G1;A1Z4L3;A1Z519;A3FPA1;A3R0R5;A4GWW2;A4GYN0;A4LB80;A4ZLA9;A4ZLL3;A4ZM04;A4ZM68;A4ZYE7;A5JYK3;A6YUI6;A6YUS7;A6YUU0;A6YVN9;A6YVQ2;A6YVS8;A6YW31;A6YW69;A6YWX8;A6YX94;A6YXS6;A6YYN7;A6Z2Z4;A6Z4T0;A6Z571;A6Z659;A6Z698;A6Z6R7;…	1.9652	1.7722	1.7462
LMAN2;C5orf8	Vesicular integral-membrane protein VIP36	Q12907;A8K7T4;B4DWN1	2.026	1.6578	1.7946
SURF4;SURF-4;RP11-244N20.4-002	Isoform 1 of Surfeit locus protein 4;Surfeit 4;Surfeit 4	O15260-1;O15260;Q5T8U7;O15260-2;Q5T8U5	2.0909	1.6104	1.7717
CTSC;CPPI	Dipeptidyl-peptidase 1	P53634;B4DJQ8	2.0844	1.7172	1.6347
PDIA3;ERP57;ERP60;GRP58	Protein disulfide-isomerase A3;cDNA FLJ53558, highly similar to Protein disulfide-isomerase A3	P30101;B3KQT2;B3KQT9;B4DDM1;B4DJ98	2.0039	1.6734	1.7406
NUCB2;NEFA	Nucleobindin-2;Nucb2 splice variant	P80303;A8K642;A7LNF3;A7LNF4;A7LNF5;Q2L696	1.8049
TM9SF3;SMBP;UNQ245/PRO282;RP11-34E5.1;RP11-34E5.1-003	Transmembrane 9 superfamily member 3;SM-11044 binding protein	Q9HD45;B4DN13;Q5TB57;Q8NCC4;Q8WUB5;Q96JZ5;Q96K55;Q5TB53	1.893	1.3272	2.1714
NOMO2;NOMO3;NOMO1;PM5	Isoform 1 of Nodal modulator 2;139 kDa protein;Isoform 2 of Nodal modulator 2;Nodal modulator 3;Nodal modulator 1	Q5JPE7-1;Q5JPE7;Q4G177;Q5JPE7-2;P69849;Q1LZN2;Q15155	2.09	1.6149	1.6756
MS4A1;CD20	B-lymphocyte antigen CD20;cDNA FLJ51650, moderately similar to B-lymphocyte antigen CD20	P11836;A8K803;B4DT24	1.9316	1.6558	1.7909
ASAH1;ASAH	Acid ceramidase;N-acylsphingosine amidohydrolase 1 isoform b;N-acylsphingosine amidohydrolase 1 isoform c	Q13510;A8K0B6;B1B5P6;B1B5Q0;B1B5Q9;B1B5R8;B1B5T0;B1B5T7;Q53H01;B1B5Q2;B1B5Q3;B1B5Q8;B1B5S5;B1B5S6;B1B5S7;B1B5S8;B3KUZ6;Q6W898;B1B5P7;B1B5R9;Q96AS2	1.8104	1.6145	1.9509
C9orf46;AD025;MDS030	Transmembrane protein C9orf46	Q9HBL7;B2R6W0	1.9785	1.4767	1.9113
TXNDC12;TLP19;UNQ713/PRO1376	Thioredoxin domain-containing protein 12	O95881;B3KQS0	2.0189	1.4306	1.9165
ARL6IP5;DERP11;JWA;PRA2;PRAF3;HSPC127	PRA1 family protein 3;cDNA FLJ52128, highly similar to PRA1 family protein 3;cDNA FLJ51702, moderately similar to PRA1 family protein 3	O75915;B2R6V5;B3KQB4;B4DZZ0;B4DWQ6	1.939	1.5648	1.8478
LNPEP;OTASE	cDNA, FLJ94965, highly similar to Homo sapiens leucyl/cystinyl aminopeptidase (LNPEP), mRNA;Isoform 1 of Leucyl-cystinyl aminopeptidase;Isoform 2 of Leucyl-cystinyl aminopeptidase;Isoform 3 of Leucyl-cystinyl aminopeptidase	B2RAK1;Q9UIQ6-1;Q9UIQ6;Q9UIQ6-2;Q59H76;Q9TNQ2;Q9TNQ3;Q9UIQ6-3	1.9932	1.5795	1.7525
IGF2R;MPRI	Cation-independent mannose-6-phosphate receptor;274 kDa protein	P11717;A0N9R6;A0N9R7;B4DUY7;Q59EZ3	1.9585	1.506	1.8569
CALU	Calumenin, isoform CRA_c;Isoform 2 of Calumenin	O43852-1;O43852;B3KPG9;B3KQF5;Q6IAW5;O43852-2;B3KNG6;B3KQK3	1.7703
PRKCSH;G19P1	cDNA FLJ59211, highly similar to Glucosidase 2 subunit beta;protein kinase C substrate 80K-H isoform 2;PRKCSH protein (Fragment)	P14314;B4DJQ5;A8K318;A2VCQ4	1.9363	1.7692	1.6042
ZMPSTE24;FACE1;STE24	CAAX prenyl protease 1 homolog	O75844;B3KNM6;B3KQI7	1.9775	1.5541
RTN3;ASYIP;NSPL2	Isoform 1 of Reticulon-3;Isoform 2 of Reticulon-3;Isoform 4 of Reticulon-3;Isoform 3 of Reticulon-3;Isoform 5 of Reticulon-3	O95197-1;O95197;O95197-2;O95197-4;O95197-3;B3KQS2;O95197-5	1.8708	1.499	1.9092
CDKN2A;CDKN2;MTS1;CDKN2B;MTS2	Cyclin-dependent kinase inhibitor;Cyclin-dependent kinase 4 inhibitor B;Isoform 2 of Cyclin-dependent kinase inhibitor 2A, isoforms 1/2/3	P42771-1;P42771;A5X2G7;P42772;Q86WJ4;P42771-2;A7LNE7		1.7562
APOO;FAM121B;My025;UNQ1866/PRO4302	Isoform 1 of Apolipoprotein O;20 kDa protein;Isoform 2 of Apolipoprotein O	Q9BUR5-1;Q9BUR5;B2R4K9;Q9BUR5-2	1.9075	1.6186	1.7308
KIAA0152	Uncharacterized protein KIAA0152	Q14165	1.8172	1.6739	1.7594
CYB5B;CYB5M;OMB5	cytochrome b5 outer mitochondrial membrane precursor;Cytochrome b5 type B	O43169;A8K6B1;Q5HYD9	1.9307	1.5762	1.7427
RPN2;RP3-343K2.2-003;hCG_37142;RP3-343K2.2-002	Dolichyl-diphosphooligosaccharide--protein glycosyltransferase subunit 2;ribophorin II isoform 2 precursor;cDNA, FLJ96923, highly similar to Homo sapiens ribophorin II (RPN2), mRNA;Ribophorin II;Putative uncharacterized protein RPN2	P04844;Q5JYR6;B2RE46;Q5JYR7;A6NKT1;B4DJL0;Q5JYR4	1.8301	1.6831	1.7159
ABCB7;ABC7	Isoform 2 of ATP-binding cassette sub-family B member 7, mitochondrial;Isoform 1 of ATP-binding cassette sub-family B member 7, mitochondrial	O75027-2;O75027;B3KM98;O75027-1;B4DGL8	1.8411	1.4129	1.9744
TMED5;CGI-100;UNQ397/PRO733;RP5-976O13.2-005;RP5-976O13.2-004	Transmembrane emp24 domain-containing protein 5;Transmembrane emp24 protein transport domain containing 5;Transmembrane emp24 protein transport domain containing 5	Q9Y3A6;B2R703;B4DDR7;Q49AG2;B1AKT4;B1AKT3	1.8036	1.6258	1.7968
HYOU1;ORP150	Hypoxia up-regulated protein 1	Q9Y4L1;A8C1Z0;B3KXH0;Q05D91;Q68D25;Q6IN67;Q9BST8	1.8944	1.692	1.6227
NCLN	Isoform 1 of Nicalin;Isoform 2 of Nicalin	Q969V3-1;Q969V3;B2RA56;Q969V3-2	2.0482	1.4171
DCTN3;DCTN22;RP11-296L22.3-007	Isoform 1 of Dynactin subunit 3;Isoform 3 of Dynactin subunit 3;Isoform 2 of Dynactin subunit 3;Dynactin 3 (P22), isoform CRA_a;12 kDa protein	O75935-1;O75935;B2RBM5;O75935-3;O75935-2;Q5T1I6;Q8NB28		1.139	2.3221
LAMP1	Lysosome-associated membrane glycoprotein 1;cDNA FLJ57633, highly similar to Lysosome-associated membrane glycoprotein 1	P11279;B3KRY3;B4DWL3	1.7583	1.4274	1.9869
ENTPD1;CD39	cDNA FLJ54465, highly similar to Ectonucleoside triphosphate diphosphohydrolase1;Isoform Vascular of Ectonucleoside triphosphate diphosphohydrolase 1	P49961-2;P49961;B4DWB9;Q5T561;P49961-1;B4E1X1;Q86VV3	1.7298	1.8464	1.5549
CANX	cDNA FLJ55574, highly similar to Calnexin	P27824;B2R5V8;B4DGP8;B4E2T8	1.8761	1.6009	1.6536
DERL1;DER1;UNQ243/PRO276	Derlin-1;Der1-like domain family, member 1 isoform b;cDNA FLJ57771, highly similar to Derlin-1	Q9BUN8;B3KW41;B4E1G1	1.8056	1.538	1.7791
PDIA6;TXNDC7	Isoform 2 of Protein disulfide-isomerase A6;Isoform 1 of Protein disulfide-isomerase A6	Q15084-2;Q15084;B3KY95;B5MBW7;Q15084-1;Q53RC7	1.8637	1.6112	1.6384
CALR;CRTC	Calreticulin	P27797;B4DHR1;B4E2Y9;Q53G71;Q6IAT4	1.8998	1.5897	1.6228
TXNDC5;TLP46;UNQ364/PRO700;hCG_1811539	Thioredoxin domain-containing protein 5;thioredoxin domain containing 5 isoform 2	Q8NBS9;Q658S9;Q6EHZ3;B2RDM2;Q86UY0	2.029	1.452	1.6241
TMEM109	Transmembrane protein 109;cDNA FLJ57860, highly similar to Transmembrane protein 109	Q9BVC6;B2R9T9;B4E1S3	1.9012	1.5169	1.6726
TMED9;GP25L2	transmembrane emp24 protein transport domain containing 9	Q9BVK6;B2R8A2;B4DPP4	1.8104	1.6003	1.6724
SEC61A1;SEC61A	cDNA FLJ59739, highly similar to Protein transport protein Sec61 subunit alpha isoform 1;Isoform 3 of Protein transport protein Sec61 subunit alpha isoform 1	P61619-1;P61619;B3KNF6;B4DR61;P61619-3	1.7656	1.62
RNASET2;RNASE6PL	Ribonuclease T2;Isoform 1 of Ribonuclease T2	A6XND5;O00584-1;O00584;B2RDA7	1.6408	1.5504	1.8866
P4HA1;P4HA	Isoform 1 of Prolyl 4-hydroxylase subunit alpha-1;Isoform 2 of Prolyl 4-hydroxylase subunit alpha-1	P13674-1;P13674;P13674-2;Q5VSQ6	1.597	1.3158	2.1633
DAD1	Dolichyl-diphosphooligosaccharide--protein glycosyltransferase subunit DAD1	P61803;Q53G02	1.662	1.6663	1.7456
P4HB;ERBA2L;PDI;PDIA1;PO4DB;hCG_95895	Protein disulfide-isomerase;cDNA FLJ59430, highly similar to Protein disulfide-isomerase	P07237;B2RDQ2;B4DJS0;B4DNL5;B3KTQ9;B4DLN6;B4DUA5;Q96C96	1.8312	1.5094	1.7304
2009-09-15	15 kDa selenoprotein isoform 1 precursor	O60613-1;O60613	1.8074	1.6241	1.634
JAGN1	GL009;Protein jagunal homolog 1	Q9BY51;Q8N5M9	1.9337	1.4425
PDIA4;ERP70;ERP72	Protein disulfide-isomerase A4	P13667;A8K4K6;Q549T6	1.7861	1.6099	1.6413
PRDX4	Peroxiredoxin-4;Protein	Q13162	1.7588	1.6162	1.661
VDAC1;VDAC	Voltage-dependent anion-selective channel protein 1;20 kDa protein;Similar to Voltage-dependent anion-selective channel protein 1	P21796;B3KTS5;B3KVK4	1.7809	1.6699	1.5743
IGJ;IGCJ	immunoglobulin J chain	P01591	2.1791	0.96538	1.876
FCRLA;FCRLM1;hCG_1641577;FCRL;FCRL1;FCRX;FREB;UNQ291/PRO329;RP11-474I16.5-004	Fc receptor-like and mucin-like 1;Putative uncharacterized protein FCRLA;Isoform 2 of Fc receptor-like A;Isoform 8 of Fc receptor-like A;Isoform 3 of Fc receptor-like A;Fc receptor-like A;Isoform 4 of Fc receptor-like A;Isoform 5 of Fc receptor-like A	A0N0M1;Q7L513-1;Q7L513;A6NC03;Q7L513-2;Q7L513-8;Q5VXA4;Q6MZF2;Q7L513-3;Q5VXB1;Q7L513-4;Q7L513-5	2.0345	1.5298	1.455
ERO1L;UNQ434/PRO865	ERO1-like protein alpha;Putative uncharacterized protein ERO1L	Q96HE7;A8K9X4;A8MYW1	1.6216	1.56	1.8377
ADPGK;PSEC0260	Isoform 1 of ADP-dependent glucokinase;Isoform 2 of ADP-dependent glucokinase	Q9BRR6-1;Q9BRR6;B4DDP8;B4DG35;Q9BRR6-2	1.8349	1.51
VKORC1L1	Vitamin K epoxide reductase complex subunit 1-like protein 1	Q8N0U8;A8K0F7	2.0112	1.5417	1.4611
NENF;SPUF	Neudesin	Q9UMX5	1.8692	1.4714
ATP5D	ATP synthase subunit delta, mitochondrial	P30049;Q6FG90	1.9095	1.4666	1.6336
PTBP2;NPTB;PTB;PTBLP	cDNA FLJ55936, highly similar to Polypyrimidine tract-binding protein 2;Isoform 4 of Polypyrimidine tract-binding protein 2;Isoform 2 of Polypyrimidine tract-binding protein 2;Isoform 1 of Polypyrimidine tract-binding protein 2;Isoform 6 of Polypyrimidine tract-binding protein 2;Isoform 5 of Polypyrimidine tract-binding protein 2;Polypyrimidine tract binding protein 2 variant (Fragment)	Q9UKA9-3;Q9UKA9;B4DSI2;B4DSS8;B4DSU5;O95652;Q9UKA9-4;A8MYV9;B4DI28;Q9UKA9-2;Q9UKA9-1;Q9UKA9-6;Q9UKA9-5;Q59G43	2.383	0.94549
SPTLC2;KIAA0526;LCB2	Serine palmitoyltransferase 2	O15270		1.6638
NNT	NAD(P) transhydrogenase, mitochondrial	Q13423;B4DMN9;B4DS88;Q2TB59;Q8N5H5	1.825	1.4715	1.6912
B4GALT1;GGTB2	Isoform Long of Beta-1,4-galactosyltransferase 1;Isoform Short of Beta-1,4-galactosyltransferase 1	P15291-1;P15291;B2R710;B4DLB8;B4DMM8;Q86XA6;P15291-2	1.6625
TPP1;CLN2;GIG1;UNQ267/PRO304	cDNA FLJ56402, highly similar to Tripeptidyl-peptidase 1;Putative uncharacterized protein TPP1;cDNA FLJ58558, highly similar to Tripeptidyl-peptidase 1;cDNA FLJ57277, highly similar to Tripeptidyl-peptidase 1	O14773-1;O14773;B2R608;B4DIV8;Q53HP2;B4DE89;B4DVA5;B5MDC1;B4E0C7;O14773-2;B4DSE2	1.7547	1.5027	1.7215
FUNDC2;GS1-273L24.1-004;HCBP6;DC44;HCC3;PD03104;LOC388965;hCG_1643983	FUN14 domain containing 2;FUN14 domain-containing protein 2;FUN14 domain containing 2 pseudogene	Q5HYP8;Q9BWH2;B2R7W5;Q6NVW6	2.0285	1.3419	1.6043
TOMM22;TOM22	Mitochondrial import receptor subunit TOM22 homolog	Q9NS69;Q53GB0;Q549C5	1.8879	1.4637	1.5996
HSPD1;HSP60	60 kDa heat shock protein, mitochondrial	P10809;B2R5M6;Q53QD5;Q53SE2;Q96RI4;Q9UCR6	1.7955	1.5192	1.6329
HSPA5;GRP78	HSPA5 protein	P11021;B0QZ61;B4DEF7;Q2KHP4	1.7744	1.6038	1.5612
COX4I1;COX4	Cytochrome c oxidase subunit 4 isoform 1, mitochondrial	P13073;B2R4J2;Q6P666	1.8469	1.4584	1.6276
ATP5B;ATPMB;ATPSB	ATP synthase subunit beta, mitochondrial	P06576;A8K4X0;Q0QEN7	1.8151	1.5539	1.5623
PSAT1;PSA	cDNA FLJ56437, highly similar to Phosphoserine aminotransferase;Isoform 2 of Phosphoserine aminotransferase	Q9Y617-1;Q9Y617;B4DHQ3;B4DHX7;Q5T7G6;Q9Y617-2;A9LS35;Q5T7G5	1.8122	1.6124	1.4816
GK;GK3P;GKP3;GKTB	Glycerol kinase;Isoform 3 of Glycerol kinase;Isoform 2 of Glycerol kinase;Putative glycerol kinase 3;Glycerol kinase;glycerol kinase isoform a;Isoform 1 of Glycerol kinase	B4DH54;Q6IQ27;P32189-3;P32189;P32189-2;Q14409;A6NJP5;P32189-1;B2R833		1.7103	1.5556
MT-CO2;COII;COXII;MTCO2	Cytochrome c oxidase subunit 2	P00403;A0S0W7;A0S2P1;A0S3T1;A0SA07;A1Z455;A1Z4V2;A4ZKZ0;A6YW54;A6YWD1;A6YXV0;A6Z3M5;A6Z6E8;A6ZEU4;A6ZF47;A6ZFK3;A6ZHA9;A7LDC6;A7LF11;A7LFA2;B0Z6W4;B1W855;B2CB37;B2WRY8;B2XHF9;B2XHT9;B2XIR3;B2XL43;B2XP28;B2XPS3;B2YKU2;B3DE06;B3GR49;B3GUF3;B5M7M0;Q06TE6;Q09U41;Q0Z7D8;Q0Z7F1;Q0Z7J0;Q0Z7K3;Q0Z7S0;Q14XI3;Q14XT3;Q15HH9;Q19MP7;Q305H0;Q4EYL1;Q4EZD4;Q4F4V6;Q4F6A2;Q4GCC3;Q4GCG2;Q4GCZ4;Q4GHE1;Q4GQP0;Q4GVP5;…	1.7452	1.4925	1.6478
VDAC2;RP11-375G3.1-010;RP11-375G3.1-005	Isoform 3 of Voltage-dependent anion-selective channel protein 2;Uncharacterized protein ENSP00000367226;Isoform 1 of Voltage-dependent anion-selective channel protein 2;similar to voltage-dependent anion channel;Voltage-dependent anion-selective channel protein 2;similar to voltage-dependent anion channel;Voltage-dependent anion channel 2;Voltage-dependent anion channel 2	P45880-3;P45880;B4DKM5;A6NLE7;P45880-1;P45880-2;Q5JSD1;Q5JSD2	1.9058	1.5204	1.4515
SQSTM1;ORCA;OSIL	Isoform 1 of Sequestosome-1;Isoform 2 of Sequestosome-1;cDNA FLJ52854, highly similar to Sequestosome-1	Q13501-1;Q13501;B2R661;Q13501-2;B3KUW5;B4E3V2	1.5815	1.402	1.8913
PIR	Pirin	O00625;Q6FHD2	1.7249	1.4128	1.7348
ICAM3	Intercellular adhesion molecule 3	P32942;B2R736;Q5NKU1	1.8798	1.5186	1.4696
C14orf1;AD-011;HSPC288;x0006	Probable ergosterol biosynthetic protein 28	Q9UKR5;Q6FII3;Q86TW5	1.7864	1.5692	1.5085
SORL1	Sortilin-related receptor	Q92673;B2RNX7;B4DG45;B4DHG9;B4DJ13;B4DYT0			1.6212
TM9SF4;KIAA0255	Isoform 1 of Transmembrane 9 superfamily member 4;Isoform 2 of Transmembrane 9 superfamily member 4;cDNA FLJ53349, highly similar to Transmembrane 9 superfamily protein member 4;cDNA FLJ54711, highly similar to Transmembrane 9 superfamily protein member 4	Q92544-1;Q92544;B0QYT7;Q92544-2;B4DH88;B4DKC1;B4DYH6	1.7816	1.4644	1.6145
PGRMC2;DG6;PMBP	Membrane-associated progesterone receptor component 2	O15173	1.7941	1.4934	1.5695
CD37;TSPAN26	Leukocyte antigen CD37;cDNA FLJ61172, highly similar to Leukocyte antigen CD37;CD37 antigen isoform B;cDNA FLJ58471, highly similar to Leukocyte antigen CD37	P11049;B4DVC1;B4DW15	1.8324	1.4
TXNDC13;KIAA1162;PSEC0095;UNQ475/PRO938	Thioredoxin domain-containing protein 13	Q9H1E5	1.6139
TMEM167A;TMEM167	Transmembrane protein 167A;similar to Transmembrane protein 167	Q8TBQ9	1.821	1.4848	1.5266
KRTCAP2;KCP2	Keratinocytes-associated protein 2	Q8N6L1;B2R4Q1	1.6093
ATP5A1;ATP5A;ATP5AL2;ATPM	ATP synthase subunit alpha, mitochondrial;cDNA FLJ54107, highly similar to ATP synthase subunit alpha, mitochondrial	P25705;A8K092;B4DY56	1.7985	1.4814	1.5467
IGHG1;DKFZp686N02209;DKFZp686H20196;DKFZp686O01196;IGHM;IGHV4-31;DKFZp686G11190;DKFZp686P15220;DKFZp686I15196;DKFZp686K03196	IGHG1 protein;Putative uncharacterized protein DKFZp686N02209;Putative uncharacterized protein DKFZp686H20196;Putative uncharacterized protein DKFZp686O01196;IGHM protein;IGHM protein;Immunoglobulin heavy variable 4-31;IGHG1 protein;Anti-RhD monoclonal T125 gamma1 heavy chain;Putative uncharacterized protein DKFZp686G11190;IGHV4-31 protein;cDNA FLJ78387;Putative uncharacterized protein DKFZp686P1…	Q6PJ95;Q7Z351;Q6N097;Q6N094;Q6PJF1;Q6PI81;Q6GMX1;Q6GMX6;P01857;Q6GMW7;Q5EFE5;Q6MZQ6;Q6P055;A8K008;Q6N089;Q6PJA4;Q7Z5W1;Q569F4;Q7Z7P5;Q6N096;Q6PYX1;Q6N095;Q96PQ8	1.9963	1.4139	1.4147
RCN1;RCN	Reticulocalbin-1	Q15293;Q5J7V8	1.7212	1.4629	1.6372
IER3IP1;HSPC039	Immediate early response 3-interacting protein 1	Q9Y5U9		1.6298	1.5794
MTP18;HSPC242;My022	Mitochondrial 18 kDa protein;Putative uncharacterized protein ENSP00000383926;37 kDa protein	Q9UDX5;B5MC22		1.3768	1.8316
FKBP2;FKBP13	FK506-binding protein 2	P26885;Q53XJ5	1.9926	1.2746	1.5355
	Ig kappa chain V-III region HAH;Ig kappa chain V-III region HIC;Myosin-reactive immunoglobulin light chain variable region (Fragment);HRV Fab N27-VL (Fragment);Ig kappa chain V-III region SIE;Ig kappa chain V-III region WOL;HRV Fab 026-VL (Fragment);K light chain variable region (Fragment);Cold agglutinin FS-2 L-chain (Fragment);Ig kappa chain V-III region GOL;Ig kappa chain V-III region Ti;Ig ka…	P18135;P18136;Q9UL78;A2IPI2;A2IPI3;P01620;P01623;A2IPI5;A2NXP9;A2NB46;P04206;P01622;P01621	1.5623	1.5709	1.666
ERP29;C12orf8;ERP28	Endoplasmic reticulum protein ERp29	P30040	1.767	1.5402	1.49
LY75;CD205	Isoform 4 of Lymphocyte antigen 75;Isoform 2 of Lymphocyte antigen 75;Isoform 3 of Lymphocyte antigen 75	O60449-1;O60449;Q53R46;Q53TF5;Q59H44;O60449-2;O60449-3	1.7902	1.5129	1.4904
DC2;HDCMD45P;HSPC307	UPF0527 transmembrane protein;17 kDa protein	Q9NRP0;B2R5H1			1.5954
TM9SF2	Transmembrane 9 superfamily member 2;cDNA FLJ36188 fis, clone TESTI2027179, highly similar to Transmembrane 9 superfamily protein member 2	Q99805;A8K399;B3KSG9	1.7374	1.5415	1.5032
CDKN2C;CDKN6	Cyclin-dependent kinase 4 inhibitor C	P42773;Q6ICV4;Q9P1T2	1.5932
DDOST;KIAA0115;OST48;OK/SW-cl.45	dolichyl-diphosphooligosaccharide-protein glycosyltransferase precursor;cDNA FLJ52929, highly similar to Dolichyl-diphosphooligosaccharide--proteinglycosyltransferase 48 kDa subunit	P39656;B2RDQ4;B4DLI2;Q5VWA5;B4DJE3	1.7689	1.5823	1.4174
NCF4;CTA-833B7.3-002;SH3PXD4;CTA-833B7.3-004;CTA-833B7.3-003	neutrophil cytosolic factor 4 isoform 2;Isoform 2 of Neutrophil cytosol factor 4;Isoform 1 of Neutrophil cytosol factor 4;Neutrophil cytosolic factor 4, 40kDa;Neutrophil cytosolic factor 4, 40kDa	A8K4F9;Q15080-2;Q15080;Q15080-1;Q53FG4;Q6FGM9;B0QY04;B0QY05		1.5868
SEC11C;SEC11L3;SPC21;SPCS4C;hCG_33729	Signal peptidase complex catalytic subunit SEC11C;cDNA FLJ57851, highly similar to Microsomal signal peptidase 21 kDa subunit;16 kDa protein	Q9BY50;B2RAA3;B4DI03	1.7337	1.5376	1.4878
	Immunglobulin heavy chain variable region (Fragment);Uncharacterized protein ENSP00000375034	Q0ZCH6;A6NJ67			1.5855
UQCRC1	Cytochrome b-c1 complex subunit 1, mitochondrial	P31930;B2R7R8;B4DUL5	1.6766	1.5066	1.5701
VDAC3	Isoform 1 of Voltage-dependent anion-selective channel protein 3;Isoform 2 of Voltage-dependent anion-selective channel protein 3	Q9Y277-1;Q9Y277;Q9Y277-2	1.6509	1.4919	1.5968
TMED3;C15orf22;UNQ5357/PRO1078	Transmembrane emp24 domain-containing protein 3;cDNA FLJ58917, highly similar to Transmembrane emp24 domain-containing protein 3;cDNA FLJ58873, highly similar to Transmembrane emp24 domain-containing protein 3	Q9Y3Q3;A8K069;Q53HR4;Q9UMB6;B4DN05;B4E277;Q8N2D9		1.3726	1.7699
RPN1	Dolichyl-diphosphooligosaccharide--protein glycosyltransferase 67 kDa subunit precursor	P04843;B2R5Z0;B4DL99;B4DNJ5;Q53EP4;Q6IBR0;Q96HX3	1.6112	1.6172	1.482
SYNJ2BP;OMP25	Synaptojanin-2-binding protein	P57105	1.9058	1.4448	1.3567
TOMM40;C19orf1;PEREC1;TOM40	Isoform 1 of Mitochondrial import receptor subunit TOM40 homolog;Isoform 2 of Mitochondrial import receptor subunit TOM40 homolog	O96008-1;O96008;O96008-2	1.7444	1.5867	1.3693
EBP	3-beta-hydroxysteroid-Delta(8),Delta(7)-isomerase;18 kDa protein;17 kDa protein	Q15125;Q6FGL3	1.83	1.4115	1.4578
ATP5L	ATP synthase subunit g, mitochondrial	O75964;A8K0K3	1.748	1.4053	1.5343
COX5B	Cytochrome c oxidase subunit 5B, mitochondrial	P10606;Q53YB7;Q6FHJ9;Q6FHM4	1.7756	1.4645	1.4429
GMDS;RP1-118B18.1-002	GDP-mannose 4,6 dehydratase;GDP-mannose 4,6-dehydratase	O60547;B2R9X3;Q5TGM9		1.5602
FAM162A;C3orf28;E2IG5;DC16;FWP001	UPF0389 protein FAM162A;cDNA FLJ59673, highly similar to Homo sapiens growth and transformation-dependent protein (E2IG5), mRNA	Q96A26;B4DF97	1.654	1.282	1.737
ATP5H;My032	Isoform 1 of ATP synthase subunit d, mitochondrial;Isoform 2 of ATP synthase subunit d, mitochondrial	O75947-1;O75947;B2R5L6;O75947-2	1.6553	1.5476	1.4591
PPGB;hCG_38374;CTSA;RP3-337O18.1-005;RP3-337O18.1-006	cathepsin A isoform a precursor;Lysosomal protective protein;Cathepsin A;Cathepsin A	Q59EV6;P10619;B2R798;B4E324;Q5JZH0;Q5JZG9;Q8TD81	1.5738	1.4988	1.5886
SFXN1	Sideroflexin-1	Q9H9B4;B3KPW3	1.726	1.3866	1.5459
SEC11A;SEC11L1;SPC18;SPCS4A;hCG_26624	28 kDa protein;Signal peptidase complex catalytic subunit SEC11A;16 kDa protein;Signal peptidase complex SPC-18	P67812;B2RAD7;Q6IAM7;B4DUL4;Q7Z4Z6	1.7582	1.4551	1.4387
SLC1A4;ASCT1;SATT	Neutral amino acid transporter A;HASCT1	P43007;B2R7N6;Q53F03;Q9P2X2	1.7211	1.3285	1.5941
CHP	Calcium-binding protein p22;cDNA FLJ57188, highly similar to Calcium-binding protein p22	Q99653;B2R6H9;B4DSB5	1.7323	1.3727	1.538
GLB1;ELNR1	Isoform 1 of Beta-galactosidase;galactosidase, beta 1 isoform b	P16278-1;P16278;B2R7H8;Q53G40;Q53H18;A8MZ11		1.5461
TMEM165;TPARL	Transmembrane protein 165	Q9HC07;A8K3P8;B3KNQ2;B4DHW1		1.5714	1.5172
STARD3NL;MENTHO;UNQ855/PRO1864	Isoform 1 of MLN64 N-terminal domain homolog;Isoform 2 of MLN64 N-terminal domain homolog	O95772-1;O95772;A4D1X0;O95772-2		1.5533	1.5338
MESDC2;KIAA0081;UNQ1911/PRO4369	Mesoderm development candidate 2	Q14696		1.5805	1.5065
C18orf19	Uncharacterized protein C18orf19	Q96ND0		1.5431
NDUFB7	NADH dehydrogenase [ubiquinone] 1 beta subcomplex subunit 7	P17568;Q6ICN9	1.4151	1.667
GCS1	Mannosyl-oligosaccharide glucosidase	Q13724;A8K938;A8K9K4;Q58F09	1.4978	1.6175	1.5009
TOR1A;DQ2;DYT1	cDNA FLJ56343, highly similar to Torsin A;cDNA FLJ31500 fis, clone NT2NE2005517, highly similar to Torsin A	O14656-1;O14656;B2RB58;B4DGM9;B3KPA1	1.4568		1.612
ATP6V0C;ATP6C;ATP6L;ATPL	V-type proton ATPase 16 kDa proteolipid subunit	P27449;Q6FH26;Q8NHD7		1.31	1.7558
ERGIC1;ERGIC32;KIAA1181;HT034	35 kDa protein;Isoform 1 of Endoplasmic reticulum-Golgi intermediate compartment protein 1;cDNA FLJ56280, highly similar to Endoplasmic reticulum-Golgi intermediate compartment protein 1	Q969X5-1;Q969X5;Q969X5-2;B4E0N6		1.5013	1.5638
CTSS	Cathepsin S;cDNA FLJ50259, highly similar to Cathepsin S	P25774;Q6FHS5;B4DWC9	1.5374	1.3908	1.6674
TIRAP3;hCG_37564;TMED7;CGI-109	Toll-like receptor adapter molecule 2;Transmembrane emp24 domain-containing protein 7	Q6JUT2;Q9Y3B3;B4E2C1;Q3B7W7;Q8NBU8	1.6509	1.4033	1.5371
IGKC	IGKC protein;IGKC protein	Q6GMX8;Q6GMW1	1.5372	1.5505	1.4987
ATP5F1;RP11-552M11.5-005	ATP synthase subunit b, mitochondrial;ATP synthase, H+ transporting, mitochondrial F0 complex, subunit B1	P24539;A8K4W2;Q08ET0;Q53GB3;Q5QNZ2	1.641	1.4546	1.4894
TMED4	Isoform 1 of Transmembrane emp24 domain-containing protein 4;Isoform 3 of Transmembrane emp24 domain-containing protein 4;Isoform 2 of Transmembrane emp24 domain-containing protein 4;23 kDa protein	Q7Z7H5-1;Q7Z7H5;Q7Z7H5-3;Q7Z7H5-2	1.6325	1.4924	1.4567
STOML2;SLP2;HSPC108	Stomatin-like protein 2;cDNA FLJ61039, highly similar to Stomatin-like protein 2;cDNA FLJ27036 fis, clone SLV08019, highly similar to Homo sapiens stomatin (EPB72)-like 2	Q9UJZ1;B4E1K7;Q6ZNW0	1.7116	1.4637	1.4054
GDI1;GDIL;OPHN2;RABGDIA;XAP4	Rab GDP dissociation inhibitor alpha;cDNA FLJ52902, highly similar to Rab GDP dissociation inhibitor alpha	P31150;B4DH24;B4E070;Q6FG50;B4DHX4	1.8128	1.2398
RTN4;KIAA0886;NOGO;My043;SP1507;hCG_1784307;Nbla10545;NOGOC	Isoform 1 of Reticulon-4;reticulon 4 isoform D;Isoform 2 of Reticulon-4;reticulon 4 isoform E;Isoform 4 of Reticulon-4;Protein;Nogo-C;Isoform 3 of Reticulon-4	Q9NQC3-1;Q9NQC3;Q96B16;Q9NQC3-2;Q53R94;Q6IPN0;Q7L7Q6;Q3LIF1;Q53RF4;Q8IUA4;Q9NQC3-4;Q3LIF4;A6XGP7;Q9NQC3-3;Q53SY1;Q7L7Q5	1.8616	1.1884	1.5264
	Rheumatoid factor RF-ET13	O43234	1.4919	1.3378	1.7367
ATP5C1;ATP5C;ATP5CL1	Isoform Liver of ATP synthase subunit gamma, mitochondrial;Isoform Heart of ATP synthase subunit gamma, mitochondrial	P36542-1;P36542;Q6I9V2;Q8TAS0;P36542-2;A8KA31;B4DFE6;B4DL14	1.5897	1.5081	1.4512
ATP5J;ATP5A;ATPM	ATP synthase, H+ transporting, mitochondrial F0 complex, subunit F6 isoform b precursor;ATP synthase-coupling factor 6, mitochondrial;Putative uncharacterized protein ATP5J	P18859;Q6IB54;Q6NZ59;A8MUH2		1.5154
SEL1L;TSA305;UNQ128/PRO1063	Isoform 1 of Protein sel-1 homolog 1	Q9UBV2-1;Q9UBV2;Q3ZCU6	1.6429	1.2911	1.6116
SLC3A2;MDU1	solute carrier family 3 (activators of dibasic and neutral amino acid transport), member 2 isoform a;solute carrier family 3 (activators of dibasic and neutral amino acid transport), member 2 isoform b;solute carrier family 3 (activators of dibasic and neutral amino acid transport), member 2 isoform c;solute carrier family 3 (activators of dibasic and neutral amino acid transport), member 2 isofo…	P08195;B4E2Z3	1.7437	1.5018	1.2961
ANXA7;ANX7;SNX;OK/SW-cl.95	cDNA, FLJ92798, highly similar to Homo sapiens annexin A7 (ANXA7), transcript variant 2, mRNA;Isoform 1 of Annexin A7;Isoform 2 of Annexin A7	B2R657;P20073-1;P20073;B2R7L2;Q53HM8;P20073-2;B4DHY4;B4DT77;B4DWU2	1.5681	1.3406	1.6174
CD48;BCM1;BLAST1;RP11-404F10.3-002	CD48 antigen;CD48 molecule	P09326;Q5U055;Q6IAZ2;Q8MGR0	1.6701	1.5574	1.2981
ACO1;IREB1;RP11-334P12.1-003	Cytoplasmic aconitate hydratase;Aconitase 1 variant (Fragment);Aconitase 1, soluble	P21399;Q5VZA7;Q9HBB2;Q59FI0;Q5VZA6	1.3019	1.7151
MGST3;RP11-466F5.1-002;RP11-466F5.1-005	Microsomal glutathione S-transferase 3;Microsomal glutathione S-transferase 3;Microsomal glutathione S-transferase 3	Q53GB9;Q5VV89;O14880;B2R592;Q2F833;Q5VV87	1.6634	1.3251	1.5217
HK1	cDNA FLJ46359 fis, clone TESTI4049786, highly similar to Hexokinase-1;Isoform 3 of Hexokinase-1;Isoform 1 of Hexokinase-1;Isoform 2 of Hexokinase-1;Isoform 4 of Hexokinase-1	B3KXY9;P19367-3;P19367;A8K7J7;B1AR61;P78542;Q59FD4;P19367-1;B4DG62;Q71V75;P19367-2;B1AR63;P19367-4;B1AR62;B3KRA9	1.6475	1.4359	1.4188
LSS;OSC	Lanosterol synthase;30 kDa protein	P48449;B2R694;B4DJZ9		1.5006
FIS1;TTC11;CGI-135	Mitochondrial fission 1 protein	Q9Y3D6	1.6196	1.3762
TFRC	Transferrin receptor protein 1	P02786;A8K6Q8;Q1HE24	1.5752	1.4794	1.4367
OPRS1;SIGMAR1;SRBP;AAG8	Isoform 1 of Sigma 1-type opioid receptor;Isoform 3 of Sigma 1-type opioid receptor;Isoform 2 of Sigma 1-type opioid receptor;Isoform 5 of Sigma 1-type opioid receptor;Isoform 4 of Sigma 1-type opioid receptor	Q99720-1;Q99720;B4DR71;Q99720-3;A2A3U5;Q99720-2;Q99720-5;Q5T1J1;Q99720-4		1.4959
PDCD6;ALG2	Programmed cell death protein 6	O75340;B2RD16;B4DHG2;Q2YDC2;Q53FC3;Q86W51	1.5588	1.3687	1.5555
PSPH	Phosphoserine phosphatase	P78330;B2RCR5;Q53EY1	1.4334	1.5724	1.469
SPG21;ACP33;BM-019;GL010	Maspardin;spastic paraplegia 21 isoform b	Q9NZD8;B4DW44		1.4908
PGRMC1;HPR6.6;PGRMC	Membrane-associated progesterone receptor component 1	O00264;Q6IB11		1.4327	1.5451
SYNGR2;UNQ352/PRO615	SYNGR2 protein;Synaptogyrin-2;24 kDa protein;15 kDa protein;12 kDa protein	Q3KQZ2;O43760	1.6129	1.4511	1.4025
MVP;LRP	Major vault protein;cDNA FLJ53437, highly similar to Major vault protein	Q14764;B4DDR2;B4DXN0;B4DP93	1.5052	1.487	1.4734
TAPBP;NGS17;TAPA;DAMC-227D19.13-007;XXbac-BPG185D15.1-007;DADB-159G18.7-007;DAQB-126H3.1-007;XXbac-BCX165D10.5-007;DAMC-227D19.13-001;hCG_17519;DAMC-227D19.13-006;XXbac-BPG185D15.1-006	Isoform 3 of Tapasin;54 kDa protein;TAP binding protein;TAP binding protein;Putative uncharacterized protein TAPBP;tapasin isoform 1 precursor;Isoform 1 of Tapasin;Isoform 2 of Tapasin;Putative uncharacterized protein TAPBP;Tapasin;tapasin isoform 2 precursor;TAPBP protein	O15533-3;O15533;A2AB90;A2ABB9;A8MUD0;B0V003;O15533-1;B0V0A6;O15533-2;A8MUH0;A2AB92;B2ZUA4;Q6P1N7	1.5487	1.3758	1.5351
UQCRC2	Cytochrome b-c1 complex subunit 2, mitochondrial	P22695;B3KSN4	1.615	1.4328	1.4101
CNPY3;CTG4A;ERDA5;TNRC5;HSPC084;UNQ1934/PRO4409	Isoform 1 of Protein canopy homolog 3	Q9BT09-1;Q9BT09		1.5859	1.3856
PIGU;CDC91L1;PSEC0205;UNQ3055/PRO9875	Isoform 1 of Phosphatidylinositol glycan anchor biosynthesis class U protein;cDNA FLJ58335, highly similar to GPI transamidase component PIG-U;Isoform 2 of Phosphatidylinositol glycan anchor biosynthesis class U protein	Q9H490-1;Q9H490;B4DXB6;Q9H490-2		1.4827
UQCRB;UQBP	Cytochrome b-c1 complex subunit 7;16 kDa protein;12 kDa protein;UQCRB protein	P14927;B2R4A2;Q6FGD1;Q49AB7	1.7393	1.1994	1.5058
CD74;DHLAG	Isoform Short of HLA class II histocompatibility antigen gamma chain	P04233-2;P04233;A8K7R1	1.5261	1.5305	1.3787
APMAP;C20orf3;UNQ1869/PRO4305;RP4-568C11.2-002	Adipocyte plasma membrane-associated protein;cDNA FLJ58338, highly similar to Adipocyte plasma membrane-associated protein	Q9HDC9;A8K514;A2A2F9;B4DXG1		1.4757
SCAMP2	Secretory carrier-associated membrane protein 2;cDNA FLJ39057 fis, clone NT2RP7013374, highly similar to Secretory carrier-associated membrane protein 2	O15127;A8K769;B2RDF0;Q6IBK3;B3KU14	1.1433	2.3144	0.96856
ATP1A1	Isoform Long of Sodium/potassium-transporting ATPase subunit alpha-1;ATPase, Na+/K+ transporting, alpha 1 polypeptide;Isoform Short of Sodium/potassium-transporting ATPase subunit alpha-1	P05023-1;P05023;B2RBR6;Q58I23;Q5TC05;P05023-2;Q5TC01	1.6353	1.3469	1.4339
UQCRQ	Cytochrome b-c1 complex subunit 8	O14949	1.583	1.3145	1.5136
IFI30;GILT	Gamma-interferon-inducible lysosomal thiol reductase;interferon, gamma-inducible protein 30 preproprotein	P13284;A6XNE3;A8K686;Q76MF9;Q8NEI4;Q8WU77;Q9UPH8	1.4675	1.4267	1.5045
HTATIP2;CC3;TIP30	HIV-1 Tat interactive protein 2, 30kDa isoform a;HIV-1 Tat interactive protein 2, 30kDa isoform b	Q9BUP3-1;Q9BUP3;A8K7S7		1.466
ACSS1;ACAS2L;KIAA1846;DKFZp666B209	Isoform 1 of Acetyl-coenzyme A synthetase 2-like, mitochondrial;Isoform 2 of Acetyl-coenzyme A synthetase 2-like, mitochondrial;Putative uncharacterized protein DKFZp666G0810	Q9NUB1-1;Q9NUB1;B3KXL2;B4DJZ3;Q1RMZ4;Q6ZV30;Q7Z5G3;Q9NUB1-2;Q658R1;Q658X4		1.4633
HOOK3	Protein Hook homolog 3	Q86VS8		0.90149	2.0247
	18 kDa protein		1.0464	2.3948	0.94144
PITRM1;KIAA1104;MP1	Isoform 2 of Presequence protease, mitochondrial;Isoform 1 of Presequence protease, mitochondrial;cDNA FLJ54065, moderately similar to Mus musculus pitrilysin metallepetidase 1 (Pitrm1), mRNA	Q5JRX3-2;Q5JRX3;Q5JRX3-1;B3KM51;B3KMJ6;B3KN37;B4DH07;B4DRW8;B4E0J8	1.637	1.272	1.4736
AGPAT5	1-acyl-sn-glycerol-3-phosphate acyltransferase epsilon	Q9NUQ2;Q6NUM7		1.4577
CCDC109A;C10orf42	Isoform 1 of Coiled-coil domain-containing protein 109A;Isoform 2 of Coiled-coil domain-containing protein 109A	Q8NE86-1;Q8NE86;B2RDF3;B3KXV7;Q8NE86-2;B4DWD0		1.4134	1.4994
BLVRB;FLR	22 kDa protein;Flavin reductase	P30043;B2R5C6	1.4722	1.4029	1.4906
ZFP161;ZBTB14	Zinc finger protein 161 homolog	O43829;B2R850	0.77791	2.1274
HIST1H3A;H3FA;HIST1H3B;H3FL;HIST1H3C;H3FC;HIST1H3D;H3FB;HIST1H3E;H3FD;HIST1H3F;H3FI;HIST1H3G;H3FH;HIST1H3H;H3FK;HIST1H3I;H3FF;HIST1H3J;H3FJ	Histone H3.1	P68431;A5PLR1	1.0024	2.2387	1.1103
SSR1;TRAPA;PSEC0262	Isoform 1 of Translocon-associated protein subunit alpha;Isoform 2 of Translocon-associated protein subunit alpha	P43307-1;P43307;B2R6N9;P43307-2	1.3576	1.3482	1.6425
UQCRFS1;UQCRFSL1	cDNA FLJ76502, highly similar to Homo sapiens ubiquinol-cytochrome c reductase, Rieske iron-sulfur polypeptide 1 (UQCRFS1), mRNA;Cytochrome b-c1 complex subunit Rieske, mitochondrial;Cytochrome b-c1 complex subunit Rieske-like protein 1;similar to hCG1641472	A8K519;P47985;P0C7P4	1.5475	1.3534	1.4437
SCPEP1;RISC;SCP1;MSTP034;UNQ265/PRO302	Isoform 1 of Retinoid-inducible serine carboxypeptidase;Isoform 2 of Retinoid-inducible serine carboxypeptidase;33 kDa protein	Q9HB40-1;Q9HB40;B4DP22;Q9H2J9;Q9HB40-2	1.447	1.4446
LGMN;PRSC1	Legumain;Full-length cDNA clone CS0DB001YK19 of Neuroblastoma of Homo sapiens;Full-length cDNA clone CS0DI002YH20 of Placenta of Homo sapiens	Q99538;A8K669;Q53XC6;Q6I9U9;Q96CY7;Q86TV3;Q86TV2		0.98047	1.9076
AGPAT3;UNQ759/PRO1490	1-acyl-sn-glycerol-3-phosphate acyltransferase gamma;Isoform 3 of 1-acyl-sn-glycerol-3-phosphate acyltransferase gamma;Isoform 2 of 1-acyl-sn-glycerol-3-phosphate acyltransferase gamma;cDNA FLJ61409, highly similar to 1-acyl-sn-glycerol-3-phosphate acyltransferase gamma;30 kDa protein	Q9NRZ7-1;Q9NRZ7;Q9NRZ7-3;Q9NRZ7-2;B4DUA6		1.444
NDUFA11	Isoform 1 of NADH dehydrogenase [ubiquinone] 1 alpha subcomplex subunit 11;Isoform 2 of NADH dehydrogenase [ubiquinone] 1 alpha subcomplex subunit 11	Q86Y39-1;Q86Y39;Q86Y39-2	1.6554	1.2251	1.4484
CYC1	Cytochrome c1, heme protein, mitochondrial	P08574;Q8TBT6	1.5556	1.381	1.3921
HLA-DMA;XXbac-BPG181M17.3-006;DADB-223G19.5-006;DADB-223G19.5-001;DMA;RING6;DAAP-27A1.5-001;DAMA-147C13.1-001;DAMC-226H3.5-001;DAQB-96B10.1-001;DASS-67H14.8-001;XXbac-BCX136A3.1-001;XXbac-BPG181M17.3-001;hCG_2001572;DASS-67H14.8-006;DAAP-27A1.5-002;DAMA-147C13.1-002;DAMC-226H3.5-002;DASS-67H14.8-002;XXbac-BCX136A3.1-002;XXbac-BPG181M17.3-002;DADB-223G19.5-002;XXbac-BPG181M17.3-009;DADB-223G19.5-0…	Major histocompatibility complex, class II, DM alpha;Major histocompatibility complex, class II, DM alpha;Major histocompatibility complex, class II, DM alpha;HLA class II histocompatibility antigen, DM alpha chain;major histocompatibility complex, class II, DM alpha precursor;HLA-DMA protein;Major histocompatibility complex, class II, DM alpha;Major histocompatibility complex, class II, DM alpha…	A2AAT5;A2ABI0;B0S7N4;B0V066;B0V2B3;B0UYV6;B0UYV8;P28067;Q31604;Q6ICR9;B1AZW3;Q29878;Q5SNZ7;A2AAT7;B0UYV9;A2AAT4;A2ABH9;B0S7N3;B0V065;B0V2B2;B1AZW2;B0UYV5	1.6681	1.4184	1.2421
PTCD1;KIAA0632;ATP5J2;ATP5JL	cDNA FLJ56092, highly similar to Pentatricopeptide repeat protein 1;Isoform 1 of ATP synthase subunit f, mitochondrial;Isoform 2 of ATP synthase subunit f, mitochondrial;10 kDa protein;ATP synthase, H+ transporting, mitochondrial F0 complex, subunit F2 isoform 2c;ATP synthase, H+ transporting, mitochondrial F0 complex, subunit F2 isoform 2d	O75127;A4D273;B4DJ38;Q3SYP6;Q3ZB84;P56134-1;P56134;Q53FE1;Q6IBB3;P56134-2;A6ND55	1.6015	1.2762	1.4456
AASDHPPT;CGI-80;HAH-P;HSPC223;x0005	L-aminoadipate-semialdehyde dehydrogenase-phosphopantetheinyl transferase	Q9NRN7;B2R6D1;B4DDW7	0.98978	2.3391	0.99315
NXF1;TAP;hCG_2020139	Nuclear RNA export factor 1;nuclear RNA export factor 1 isoform 2	Q9UBU9;Q68CW9;B4E227;B4E269;B4E3J0;Q59E96		1.439
BCL2	Isoform Alpha of Apoptosis regulator Bcl-2;B-cell lymphoma protein 2 beta isoform	P10415-1;P10415;A9QXG9;Q96PA0;P10415-2		1.4385
SF3B4;SAP49	Splicing factor 3B subunit 4	Q15427;B3KUJ0;Q53FG6;Q5SZ63	1.0708	2.4097	0.8348
HVCN1;VSOP;UNQ578/PRO1140	Isoform 1 of Voltage-gated hydrogen channel 1;Isoform 3 of Voltage-gated hydrogen channel 1;29 kDa protein;Isoform 2 of Voltage-gated hydrogen channel 1	Q96D96-1;Q96D96;B4DEB3;Q96D96-3;Q96D96-2	1.5322	1.4578	1.3239
ANXA11;ANX11	Annexin A11;cDNA FLJ51518, highly similar to Annexin A11	P50995;B4DVE7;Q59EP1;Q5T0G8;Q6ICS0;B4DPJ2	1.6462	1.1817	1.4834
HEXB;HCC7	Beta-hexosaminidase subunit beta	P07686;Q5URX0	1.7263	1.3588	1.2223
NDUFB8;RP11-411B6.5-006;hCG_24658;RP11-411B6.5-003	NADH dehydrogenase [ubiquinone] 1 beta subcomplex subunit 8, mitochondrial;NADH dehydrogenase;Putative uncharacterized protein	O95169;A8K0L4;Q5W145;Q5W143	1.5033	1.402	1.3993
ND2;MT-ND2;MTND2;NADH2	NADH-ubiquinone oxidoreductase chain 2;NADH-ubiquinone oxidoreductase chain 2	Q305V2;P03891;A0S231;A0S244;A0S296;A1DTN1;A1E1D9;A1E1P3;A1Z593;A4ZKY8;A4ZL79;A4ZLF7;A4ZLH0;A4ZLR1;A6YUF6;A6YZ26;A6Z529;A6Z655;A6Z7V2;A6Z8H3;A6Z9Z3;A6ZAC3;A6ZCL4;A6ZFB0;A6ZFE9;A6ZGG3;A6ZGN8;A6ZH05;A6ZH82;A6ZHD2;A7IZ41;A7LD85;A7LDG3;A7LE21;A8JN25;A8QT63;A8WEK0;B0Z714;B0Z740;B1NU62;B1PIN3;B1W713;B2CB35;B2CB48;B2CB87;B2D3M4;B2D4I5;B2KLI5;B2WRN2;B2XHY9;B2XIH0;B2XJF7;B2XL67;B2YB74;B4YDJ2;B4YDS0;B5M8B5;…			1.4346
SLC16A1;MCT1;RP4-580L15.1-005	Monocarboxylate transporter 1;cDNA FLJ53381, highly similar to Monocarboxylate transporter 1;Solute carrier family 16, member 1;Solute carrier family 16, member 1	P53985;B2R6A5;Q5T8R6;B4DKS0;B4E106;Q49A45;Q5T8R5;Q5T8R3		1.4341
CEPT1;PRO1101	Choline/ethanolaminephosphotransferase 1	Q9Y6K0;B3KN25	1.4103		1.4567
PHB2;BAP;REA	Prohibitin-2;cDNA FLJ56579, highly similar to Prohibitin-2	Q99623;Q9BXV3;B4DP75;B4DW05	1.5368	1.3923	1.3693
ATP5O;ATPO	ATP synthase subunit O, mitochondrial;Mitochondrial ATP synthase, O subunit variant (Fragment);Protein	P48047;B2R4E2;Q53HH2	1.5141	1.3861	1.3928
F11R;JAM1;JCAM;UNQ264/PRO301	Junctional adhesion molecule A;Junction adhesion molecule	Q9Y624;Q6FIB4;Q9Y5B2	1.4309
GTF3C1	Isoform 1 of General transcription factor 3C polypeptide 1;GTF3C1 protein;Isoform 2 of General transcription factor 3C polypeptide 1;Putative uncharacterized protein GTF3C1	Q12789-2;Q12789;Q6AHZ7;Q6AWA4;Q7Z7H4;Q12789-3;A8MRT3		1.4307
BSG;UNQ6505/PRO21383;hCG_20562	Isoform 1 of Basigin;Isoform 2 of Basigin;basigin isoform 4;Putative uncharacterized protein BSG	P35613-1;P35613;B4DNE1;P35613-2;B4DY23;Q54A51;A6NJW1;A8MZ77	1.5894	1.3944	1.307
CD97	Isoform 1 of CD97 antigen;Putative uncharacterized protein CD97 (Fragment);Isoform 3 of CD97 antigen;cDNA FLJ54117, highly similar to CD97 antigen;Isoform 2 of CD97 antigen	P48960-1;P48960;B2RBJ9;A8MZ46;P48960-3;B4DTS6;P48960-2;A8K7Z4;B3KUI0;B4E336	1.5293	1.3292
HSPE1	10 kDa heat shock protein, mitochondrial	P61604;Q53X54;Q9UNM1	1.6175	1.2479	1.42
ANXA4;PIG28;hCG_39482;ANX4	annexin IV;Annexin A4;ANXA4 protein	Q6LES2;P09525;B4DDF9;B4DE02;Q59FK3;Q6MZI0;B4DDZ4;B4E1S2;Q6P452	1.5249	1.2988	1.4387
ALAD	Delta-aminolevulinic acid dehydratase;Delta-aminolevulinic acid dehydratase	A8K375;Q6ZMU0;P13716;B2R6F2	1.4207
STT3B;SIMP	Dolichyl-diphosphooligosaccharide--protein glycosyltransferase subunit STT3B	Q8TCJ2	1.5238	1.3156
ALDH6A1;MMSDH	Methylmalonate-semialdehyde dehydrogenase [acylating], mitochondrial	Q02252;B2R609;B4DFS8;O43573;Q53FN8;Q53H94		1.4183
RPS27A;UBA80;UBCEP1;UBC;UBB;hCG_1998947;UBA52;UBCEP2	ubiquitin and ribosomal protein S27a precursor;similar to ubiquitin;ubiquitin C;44 kDa protein;44 kDa protein;44 kDa protein;39 kDa protein;UBC protein;30 kDa protein;ubiquitin B precursor;25 kDa protein;21 kDa protein;21 kDa protein;19 kDa protein;19 kDa protein;18 kDa protein;18 kDa protein;cDNA FLJ51326, highly similar to Homo sapiens ubiquitin B (UBB), mRNA;Ubiquitin C splice variant;16 kDa p…	P62979;B2RDW1;Q5RKT7;Q8WYN9;A8K674;Q59EM9;Q66K58;Q96H31;Q96MH4;Q9UFQ0;Q96C32;Q5U5U6;B4DV12;Q5UGI3;P62987;Q3MIH3;P62988;Q5PY61;Q49A90;A8CGI2	1.3366	1.5285	1.3885
RBM15;OTT	Isoform 1 of Putative RNA-binding protein 15;Isoform 3 of Putative RNA-binding protein 15;Isoform 2 of Putative RNA-binding protein 15	Q96T37-1;Q96T37;A1A693;Q3ZB86;Q59EY1;Q96T37-3;Q3ZAU1;Q4V760;Q86VW9;Q96T37-2		1.4173
SOD1	Superoxide dismutase [Cu-Zn];Superoxide dismutase	P00441;A8MST3	1.4372	1.413	1.3993
GLUD1;GLUD;GLUD2;GLUDP1;hCG_1993805	Glutamate dehydrogenase 1, mitochondrial;Glutamate dehydrogenase 2, mitochondrial;Glutamate dehydrogenase 1, isoform CRA_a	P00367;B3KT18;B4DGN5;B4DMF5;B4DMG8;B4E0N9;Q53GW3;P49448;B2R8G0;Q9BSD0;B3KV55;Q14400;Q9UQV0	1.5805	1.2978	1.3677
	Cold agglutinin FS-1 L-chain (Fragment);Ig kappa chain V-II region TEW	A2NB45;P01617;A0N2N3	1.4489	1.5169	1.2762
SQRDL;CGI-44	Sulfide:quinone oxidoreductase, mitochondrial	Q9Y6N5;B2R7T6;Q53HW7;Q9UHS8	1.3711	1.5557	1.3145
COX5A	Cytochrome c oxidase subunit 5A, mitochondrial	P20674;Q71UP1;Q8TB65	1.6169	1.3313	1.292
PTRH2;BIT1;PTH2;CGI-147	Peptidyl-tRNA hydrolase 2, mitochondrial precursor;Peptidyl-tRNA hydrolase 2, mitochondrial	Q96ME4;Q9Y3E5;B3KUY4	1.5451	1.4142	1.2799
COX7A2;COX7AL	Cytochrome c oxidase polypeptide 7A2, mitochondrial;Putative uncharacterized protein COX7A2	P14406;B2R5E1;Q496I0;A8MZ71			1.4121
CASP1;IL1BC;IL1BCE	Isoform Alpha of Caspase-1;Isoform Beta of Caspase-1;Isoform Zeta of Caspase-1;Isoform Gamma of Caspase-1;Isoform Delta of Caspase-1;cDNA FLJ58540, highly similar to Caspase-1;CASP1 nirs variant 1;Putative uncharacterized protein CASP1	P29466-1;P29466;A8K249;B2R8U9;B4DVD8;P29466-2;A8K257;P29466-6;P29466-3;P29466-4;B4DKN4;Q5FBZ0;B5MDZ1		1.4102
UBR4;KIAA0462;KIAA1307;RBAF600;ZUBR1	Isoform 2 of E3 ubiquitin-protein ligase UBR4;Isoform 1 of E3 ubiquitin-protein ligase UBR4;Isoform 4 of E3 ubiquitin-protein ligase UBR4;Isoform 3 of E3 ubiquitin-protein ligase UBR4;Isoform 5 of E3 ubiquitin-protein ligase UBR4;Putative uncharacterized protein UBR4	Q5T4S7-2;Q5T4S7;Q5T4S7-1;Q5T4S7-4;Q5T4S7-3;B3KM62;B3KMT2;B4DYV5;Q5T4S7-5;A8MQB1	1.2003	1.4006	1.6262
HEXA	cDNA FLJ53927, highly similar to Beta-hexosaminidase alpha chain;cDNA FLJ50884, highly similar to Beta-hexosaminidase alpha chain	P06865;B4DKE7;B4DVA7;Q53HS8;Q6AI32;Q6PJ76;Q9BVJ8;B4DVL8		1.4087
SPCS3;SPC22;UNQ1841/PRO3567	Signal peptidase complex subunit 3	P61009	1.5963	1.3728	1.2559
SLC25A3;PHC;OK/SW-cl.48	Isoform B of Phosphate carrier protein, mitochondrial;cDNA FLJ90278 fis, clone NT2RP1000325, highly similar to Phosphate carrier protein, mitochondrialprecursor;Isoform A of Phosphate carrier protein, mitochondrial;31 kDa protein;24 kDa protein;21 kDa protein	Q00325-2;Q00325;B2RE88;Q53HC3;Q7Z7N7;Q8NCF7;Q00325-1;B3KS34	1.5338	1.4115	1.2781
HIST2H2BC;HIST2H2BD	Putative histone H2B type 2-C;Putative histone H2B type 2-D	Q6DN03;Q6DRA6	0.95413	2.1915	1.0753
PHB	Prohibitin;Prohibitin variant (Fragment);23 kDa protein;Putative uncharacterized protein PHB;cDNA FLJ51562, highly similar to Prohibitin	P35232;A8K401;Q6FHP5;Q6PUJ7;Q53FV0;A8MUL1;B4DY47	1.4693	1.4338	1.3169
DBN1;D0S117E	Putative uncharacterized protein DBN1;Isoform 1 of Drebrin;Isoform 2 of Drebrin	A8MV58;Q16643-1;Q16643;B2RBG0;Q16643-2		1.4051
KIAA1429;MSTP054	Isoform 1 of Protein virilizer homolog;Isoform 3 of Protein virilizer homolog;Isoform 2 of Protein virilizer homolog;Isoform 4 of Protein virilizer homolog	Q69YN4-1;Q69YN4;Q69YN4-3;Q69YN4-2;Q69YN4-4		1.4049
IL16;hCG_2039603	interleukin 16 isoform 2;cDNA FLJ16759 fis, clone BRACE3046450, highly similar to Interleukin-16;132 kDa protein;Interleukin-16	A8MU65;Q6VVE6;Q9UME6;B3KY62;B5TY35;Q53HR8;Q6ZMQ7;Q6ZTT5;Q6ZVH3;Q14005;Q05BE6	1.4039
MT-ND5;MTND5;NADH5;ND5	NADH dehydrogenase subunit 5;NADH dehydrogenase subunit 5	P03915;A0S2X6;A0S302;A0S468;A0S481;A0S4F9;A0S556;A0S8I1;A0S8Q9;A0S939;A0S952;A0S9B7;A0SB29;A0SBB9;A0SBH1;A0SBJ7;A0SBN6;A0SBQ0;A1DSD5;A1DSK0;A1DSU1;A1DSV4;A1DSY0;A1DT71;A1DT97;A1DTC3;A1DTD6;A1DTE9;A1DTP0;A1DTY1;A1DV00;A1DVN4;A1DVT6;A1DVU9;A1E1L3;A1Z4G6;A1Z4H9;A1Z4K5;A1Z550;A3FP67;A3R0J2;A3R0K5;A3R0L8;A3R0N1;A3R0P4;A4GYN5;A4ZHZ9;A4ZL36;A4ZL49;A4ZLA1;A4ZLB4;A4ZLC7;A4ZLE0;A4ZLL8;A4ZLT3;A4ZM22;A4ZMH6;…	1.524		1.2831
TXNDC1;TMX;TXNDC;PSEC0085;UNQ235/PRO268;hCG_2042974	Thioredoxin domain-containing protein 1;cDNA FLJ51570, highly similar to Thioredoxin domain-containing protein 1	Q9H3N1;B2R7A4;B4DZX7	1.8037	1.2351	1.1714
TMEM43;UNQ2564/PRO6244;FLJ00144	Transmembrane protein 43;FLJ00144 protein	Q9BTV4;Q8TEP9	1.6507	1.3773	1.179
MTX1;MTX;MTXN;RP11-263K19.5-003	Isoform 1 of Metaxin-1;Isoform 3 of Metaxin-1;Metaxin 1;Isoform 2 of Metaxin-1	Q13505-1;Q13505;Q13505-3;B1AVS1;Q13505-2	1.5348	1.0303	1.6295
SLC25A12;ARALAR1	Calcium-binding mitochondrial carrier protein Aralar1;cDNA FLJ33752 fis, clone BRCAN2000364, highly similar to Calcium-binding mitochondrial carrier protein Aralar1	O75746;B3KMV8;A8MUJ5;B3KR64	1.4491	1.3787	1.3592
BCS1L;BCS1	Mitochondrial chaperone BCS1	Q9Y276;A8BSR7;A8JZZ8;B3KTW9;Q53EX1;Q53RT4			1.395
C17orf62	Uncharacterized protein C17orf62;20 kDa protein;hypothetical protein LOC79415 isoform b	Q9BQA9		1.3943
PRDX5;ACR1;SBBI10	Isoform Mitochondrial of Peroxiredoxin-5, mitochondrial;Isoform Cytoplasmic+peroxisomal of Peroxiredoxin-5, mitochondrial;Putative uncharacterized protein PRDX5 (Fragment);peroxiredoxin 5 isoform b precursor;peroxiredoxin 5 isoform c precursor	P30044-1;P30044;P30044-2;A8MVL5;A6NG06;A6NC19	1.4116	1.2757	1.4924
C8orf55;PSEC0098	UPF0670 protein C8orf55	Q8WUY1		1.2866	1.4969
STX6	Syntaxin-6	O43752;B2R652;B4DR17;Q49AF6		1.3901
APOL2	cDNA FLJ55764, highly similar to Apolipoprotein-L2;Apolipoprotein L2	B4E1T5;Q9BQE5	1.3887
SPCS2;KIAA0102;SPC25	Signal peptidase complex subunit 2;Similar to Signal peptidase complex subunit 2	Q15005;B4DDB9	1.3342	1.4583	1.3708
HSP90AA1;HSP90A;HSPC1;HSPCA	heat shock protein 90kDa alpha (cytosolic), class A member 1 isoform 1;Isoform 1 of Heat shock protein HSP 90-alpha;Hsp89-alpha-delta-N	P07900-2;P07900;B3KPJ9;Q86SX1;P07900-1;A8K500;Q2VPJ6;Q86U12;Q8TBA7;Q96HX7;O75322	1.4195	1.3476	1.3919
PAPOLA;PAP	cDNA FLJ56176, highly similar to Poly(A) polymerase alpha	P51003-1;P51003;B4DHB8;B4DYF4		1.3861
SDHC;CYB560;SDH3;hCG_1995943	Succinate dehydrogenase cytochrome b560 subunit, mitochondrial;succinate dehydrogenase complex, subunit C isoform 3 precursor;similar to hCG1776980;succinate dehydrogenase complex, subunit C isoform 4 precursor;hypothetical protein LOC642502	Q99643;Q5VTH3;Q6IAQ2;B4DEL5;O75609;Q3C2H4	1.5742	1.1726	1.4112
IGL@;IGLV4-3;V5-1;V1-19;IGLC1;IGLC2;IGLC3;IGLV3-25;V2-17;IGLV2-14;V1-4;V<lambda>3;C1 segment;hCG_2040025	IGL@ protein;IGLV4-3 protein;IGL@ protein;IGL@ protein;IGL@ protein;Putative uncharacterized protein;Lambda-chain;IGL@ protein;IGLV2-14 protein;IGL@ protein;IGL@ protein;IGLV3-25 protein;IGLV2-14 protein;IGLV2-14 protein;IGL@ protein;Uncharacterized protein ENSP00000374858 (Fragment);IGL@ protein;IGLV3-21 protein;IGL@ protein;IGLC1 protein;23 kDa protein;IGL@ protein;C1 segment protein	Q8N355;Q5NV61;Q8WUK3;Q6GMX3;Q6GMX4;Q6IPQ0;Q6PIQ7;A0A5E4;A2MYD2;A2NUT2;A2NV54;Q6IN99;P01842;A0A5C9;A0M8Q4;Q6PJR7;Q8TCJ5;Q6GMW3;Q8N5F4;Q5NV90;Q8TBC9;Q7Z2U3;Q5NV63;Q6PJA3;Q5FWF9;A6NKU1;Q6PIK1;A0N5G3;Q5NV74;Q6NS96;Q6GMW4;Q96I69;Q6NS95;A0M8Q9	1.4364	1.3146	1.407
ILVBL;AHAS	Isoform 1 of Acetolactate synthase-like protein	A1L0T0-1;A1L0T0		1.3857
ANXA6;ANX6	Annexin A6;cDNA FLJ26567 fis, clone LNF05260, highly similar to Annexin VI	P08133;A8K3Q7;Q6ZP35	1.4372	1.359	1.3547
HIST2H2AB	Histone H2A type 2-B	Q8IUE6	1.0429	2.0175	1.0877
IFITM1;CD225;IFI17;IFITM3;IFITM2	15 kDa protein;Interferon-induced transmembrane protein 1;Interferon-induced transmembrane protein 3;Interferon-induced transmembrane protein 2;interferon induced transmembrane protein 2;Putative uncharacterized protein IFITM1 (Fragment)	P13164;Q53XZ0;Q01628;Q53Y76;Q01629;Q6IBB0;Q6FH82;A8MX58	1.5052	1.157	1.4849
PHGDH;PGDH3;RP4-683H9.1-002	D-3-phosphoglycerate dehydrogenase;Phosphoglycerate dehydrogenase	O43175;B2RD08;B3KSC3;Q5SZU1;Q8N5M8;Q96RV5;Q96RV6;Q96RV7;Q96RV8;Q96RV9;Q9UMY2;Q9UMY3	1.4174	1.3824	1.3407
MAN2B1;LAMAN;MANB	Lysosomal alpha-mannosidase;Truncated lysosomal acid alpha-mannosidase	O00754;A8K6A7;B4E0K9;Q59E90;Q93093	1.5729	1.1867
C11orf59;PP7157	UPF0404 protein C11orf59	Q6IAA8;B4DUK2	1.5221	1.3524	1.2596
VAMP2;SYB2;VAMP3;SYB3	Putative uncharacterized protein VAMP2;Vesicle-associated membrane protein 2;Putative uncharacterized protein VAMP3;Vesicle-associated membrane protein 3;8 kDa protein	A8MWB3;A8MZ03;P63027;Q9BUC2;A8MVP3;Q15836;Q6FGG2;Q9BRV4	1.4639	1.2806	1.3889
CSTB;CST6;STFB	Cystatin-B	P04080;Q76LA1	1.4141	1.3026	1.4128
PTPLAD1;BIND1	Protein tyrosine phosphatase-like protein PTPLAD1;cDNA FLJ54138, highly similar to Homo sapiens butyrate-induced transcript 1 (HSPC121), mRNA	Q9P035;B4DRF4	1.5297	1.2396	1.3581
SEMA7A;CD108;SEMAL	Semaphorin-7A	O75326;B3KMH6;B4DDP7	1.4468	1.3024
USP48;USP31	Isoform 1 of Ubiquitin carboxyl-terminal hydrolase 48;Isoform 2 of Ubiquitin carboxyl-terminal hydrolase 48;Isoform 3 of Ubiquitin carboxyl-terminal hydrolase 48;Isoform 7 of Ubiquitin carboxyl-terminal hydrolase 48;Isoform 4 of Ubiquitin carboxyl-terminal hydrolase 48	Q86UV5-1;Q86UV5;Q86UV5-2;Q86UV5-3;Q86UV5-7;Q86UV5-4		1.3744
EARS2;KIAA1970	Probable glutamyl-tRNA synthetase, mitochondrial;EARS2 protein	Q5JPH6;B3KTT2;Q86YH3		1.3743
FCER2;CD23A;FCE2;IGEBF	Isoform A of Low affinity immunoglobulin epsilon Fc receptor;Isoform B of Low affinity immunoglobulin epsilon Fc receptor	P06734-1;P06734;P06734-2;Q30219	1.5944	1.1262	1.4012
CYB5R3;DIA1;Z93241.1-006	Isoform 1 of NADH-cytochrome b5 reductase 3;34 kDa protein;Isoform 2 of NADH-cytochrome b5 reductase 3;Cytochrome b5 reductase 3	P00387-1;P00387;P00387-2;B1AHF2;Q6TGM4;Q6TGM5;Q6ZVI6;B1AHF3	1.3813	1.3258	1.413
SLC25A11;SLC20A4	Mitochondrial 2-oxoglutarate/malate carrier protein;34 kDa protein;28 kDa protein	Q02978;Q6IBH0	1.4377	1.3224	1.3595
TALDO1;TAL;TALDO;TALDOR	Transaldolase	P37837;B2R8M2;B4DID5;Q8WZ45;Q9UMF8	1.3918	1.3579	1.3682
COX6C	Cytochrome c oxidase polypeptide VIc	P09669;B2R4D7	1.5908	1.1541
XPNPEP3	Isoform 1 of Probable Xaa-Pro aminopeptidase 3;Isoform 2 of Probable Xaa-Pro aminopeptidase 3;Isoform 3 of Probable Xaa-Pro aminopeptidase 3	Q9NQH7-1;Q9NQH7;B2R9G1;Q9NQH7-2;Q9NQH7-3	1.4416	1.3521	1.3233
TMEM85;HSPC184;PIG17	23 kDa protein;Isoform 1 of Transmembrane protein 85;Isoform 2 of Transmembrane protein 85;11 kDa protein;cDNA FLJ57999;9 kDa protein;8 kDa protein	Q5J8M3-1;Q5J8M3;Q5J8M3-2;A8K3A9;B4DJQ4		1.5494	1.1838
HLA-DMB;DMB;RING7;DAMC-226H3.4-001;DASS-67H14.7-001;XXbac-BCX136A3.2-001;XXbac-BPG181M17.1-001;DAMC-226H3.4-002;DASS-67H14.7-002;XXbac-BCX136A3.2-002;XXbac-BPG181M17.1-002;DAAP-27A1.4-002;DADB-223G19.4-002;DAMA-91I23.7-002;XXbac-BPG181M17.1-008	HLA class II histocompatibility antigen, DM beta chain;Major histocompatibility complex, class II, DM beta;Major histocompatibility complex, class II, DM beta;Major histocompatibility complex, class II, DM beta;Major histocompatibility complex, class II, DM beta;Major histocompatibility complex, class II, DM beta variant (Fragment)	P28068;Q58ZE2;Q5SNZ8;Q6LEU6;Q5STC4;A2AAT3;B4DVC2;B0S7V1;B4DJ08;A2AAT6;A2ABI3;B0S7N8;B0S7U1;B0UYV7;B0V067;B0V2B4;B1AZW4;Q59F83	1.5159	1.3231	1.2554
KIAA0090;PSEC0263;RP4-657E11.8-001	Isoform 1 of Uncharacterized protein KIAA0090;Isoform 2 of Uncharacterized protein KIAA0090;Isoform 4 of Uncharacterized protein KIAA0090;Isoform 3 of Uncharacterized protein KIAA0090;KIAA0090	Q8N766-1;Q8N766;A8K6F3;Q8N766-2;Q8N766-4;Q5TG62;Q8N766-3;Q5TG59;Q5TG60	1.4891	1.5471	1.0576
	UPF0569 transmembrane protein	Q3ZAQ7;B3KUA9		1.3636
ERLIN2;C8orf2;SPFH2;UNQ2441/PRO5003/PRO9924	Isoform 1 of Erlin-2;Isoform 3 of Erlin-2;Isoform 2 of Erlin-2;15 kDa protein	O94905-1;O94905;O94905-3;B4DM38;O94905-2	1.5042	1.3747	1.2095
DLSTP;E2k	Alpha-ketoglutarate dehydrogenase complex dihydrolipoyl succinyltransferase	Q16187		1.3623
CRYZ	Quinone oxidoreductase;crystallin, zeta isoform b;Putative uncharacterized protein CRYZ;22 kDa protein	Q08257;A6NN60;A6NP24	1.3445	1.4449	1.2974
GLG1;hCG_1980142;CFR1;ESL1;MG160	golgi apparatus protein 1;Golgi apparatus protein 1;79 kDa protein	Q6P9D1;Q92896;Q6ZMF1	1.406	1.5545	1.1217
NDUFB6	NADH dehydrogenase [ubiquinone] 1 beta subcomplex subunit 6	O95139;A8K0Y7	1.4133	1.405	1.2624
NAGK	cDNA FLJ56394, highly similar to N-acetylglucosamine kinase	Q9UJ70;B4DLZ5	1.4003	1.4007	1.2647
BAX;hCG_1811614	Isoform Beta of Apoptosis regulator BAX;Isoform Alpha of Apoptosis regulator BAX;BCL2-associated X protein isoform sigma;Isoform Psi of Apoptosis regulator BAX;Isoform Epsilon of Apoptosis regulator BAX;Isoform Delta of Apoptosis regulator BAX;Isoform Zeta of Apoptosis regulator BAX	Q07812-2;Q07812;Q5ZPJ1;Q07812-1;A8K4W1;Q9NYG7;Q07812-7;Q07812-5;O95074;Q07812-4;Q8WXU1;Q9UEI8;Q07812-6	1.3973	1.2407	1.4243
SUMF2;PSEC0171;UNQ1968/PRO4500	sulfatase modifying factor 2 isoform a precursor;sulfatase modifying factor 2 isoform b precursor;sulfatase modifying factor 2 isoform e precursor;sulfatase modifying factor 2 isoform c precursor;Isoform 2 of Sulfatase-modifying factor 2	Q8NBJ7-1;Q8NBJ7;Q8NBJ7-3;Q75LP3;A8MXB9;B4DLK7;Q8NBJ7-2;B4DU41		1.3669	1.3401
CD99;MIC2;MIC2X;MIC2Y;hCG_1733152	Isoform I of CD99 antigen;CD99 antigen isoform b precursor;21 kDa protein;Putative uncharacterized protein CD99	P14209-1;P14209;B2R932;Q6ICV7;A6NIW1;P14209-2;A8MQT7	1.6583	1.0446
HLA-DRB1	HLA-DRB1 protein (Fragment)	Q29672	1.3305	1.3465	1.3713
CDC27;D0S1430E;D17S978E	cell division cycle protein 27 isoform 1;Cell division cycle protein 27 homolog;92 kDa protein	P30260;B4DL80		1.3493
FLNB;FLN1L;FLN3;TABP;TAP	Filamin B;Isoform 1 of Filamin-B;Filamin B;Isoform 2 of Filamin-B;Isoform 3 of Filamin-B;Isoform 6 of Filamin-B;Isoform 4 of Filamin-B;Isoform 5 of Filamin-B	B2ZZ83;O75369-1;O75369;B2ZZ85;O75369-7;Q60FE7;Q68CT4;O75369-2;B2ZZ84;O75369-3;O75369-6;O75369-4;Q8WXT3;O75369-5		1.1746	1.5239
BRP44;RP1-295C6.1-003	Brain protein 44;Brain protein 44	O95563;B2R4Q7;Q5R3B4	1.5304	1.3665	1.1444
BRI3BP;KG19	BRI3-binding protein	Q8WY22	1.2808	1.3541	1.3987
WARS;IFI53;WRS	Tryptophanyl-tRNA synthetase, cytoplasmic;tryptophanyl-tRNA synthetase isoform b	P23381;B4DTK8;P78534;Q502Y0;Q53XB6;A6NGN1	1.5075	1.2876	1.2371
SLC25A4;ANT1	ADP/ATP translocase 1	P12235;A8K787	1.3234	1.4286	1.2773
FLOT2;ESA1;M17S1	Flotillin-2;flotillin 2;43 kDa protein	Q14254;Q6FG43;Q9BTI6		1.3422
ITGAL;CD11A;hCG_18670	Isoform 2 of Integrin alpha-L;Isoform 1 of Integrin alpha-L;integrin alpha L isoform b precursor	P20701-2;P20701;P20701-1;B2RAL6;Q96HB1	1.4081	1.2562	1.3613
YY1;YY2;ZNF631;ZFP42;REX1;ZNF754	62 kDa protein;Transcriptional repressor protein YY1;Transcription factor YY2;Zinc finger protein 42 homolog	P25490;O15391;B2RP10;Q96MM3		1.3418
CLIC6;CLIC1L	Isoform B of Chloride intracellular channel protein 6;Isoform A of Chloride intracellular channel protein 6	Q96NY7-1;Q96NY7;Q96NY7-2;A8K0U8		1.3405
RNPEP	Putative uncharacterized protein RNPEP	A6NKB8	1.3396
ACSL5;ACS5;FACL5;UNQ633/PRO1250	acyl-CoA synthetase long-chain family member 5 isoform a;Isoform Long of Long-chain-fatty-acid--CoA ligase 5;Fatty acid coenzyme A ligase 5;Isoform Short of Long-chain-fatty-acid--CoA ligase 5	Q9ULC5-1;Q9ULC5;A6GV77;Q9ULC5-2;B4DX30		1.3362
TMEM70	Isoform 1 of Transmembrane protein 70;Isoform 2 of Transmembrane protein 70	Q9BUB7-1;Q9BUB7;Q9BUB7-2	1.4167	1.3287	1.2614
ATP6V1F;ATP6S14;VATF	V-type proton ATPase subunit F	Q16864;A4D1K0	1.3624	1.3087
HLA-DRB1	hypothetical protein isoform 3;hypothetical protein isoform 2;HLA class II histocompatibility antigen, DR-1 beta chain	A7UHG4;B2RG90;B3GV30;B3KYW3;O19725;Q30167;P01914	1.2933	1.39	1.3231
MCCC2;MCCB	Isoform 1 of Methylcrotonoyl-CoA carboxylase beta chain, mitochondrial;Isoform 2 of Methylcrotonoyl-CoA carboxylase beta chain, mitochondrial	Q9HCC0-1;Q9HCC0;Q9HCC0-2	1.3962	1.2139	1.3932
CHORDC1;CHP1	Isoform 1 of Cysteine and histidine-rich domain-containing protein 1;Isoform 2 of Cysteine and histidine-rich domain-containing protein 1	Q9UHD1-1;Q9UHD1;B2R6P8;Q9NZ93;Q9UHD1-2	1.4623	1.2682	1.2678
HSPH1;HSP105;HSP110;KIAA0201	Isoform Beta of Heat shock protein 105 kDa;cDNA FLJ52364, highly similar to Heat-shock protein 105 kDa;Isoform 3 of Heat shock protein 105 kDa;cDNA FLJ52360, highly similar to Heat-shock protein 105 kDa;cDNA FLJ51707, highly similar to Heat-shock protein 105 kDa	Q92598-2;Q92598;Q92598-1;B4DF68;B4DYH1;Q92598-3;B4DY72;B4DZB4	1.3811	1.2994	1.3121
HIST1H2BN;H2BFD;HIST1H2BK;H2BFT;HIRIP1;HIST2H2BF;HIST1H2BH;H2BFJ;HIST1H2BL;H2BFC;HIST1H2BC;H2BFL;HIST1H2BE;H2BFH;HIST1H2BF;H2BFG;HIST1H2BG;H2BFA;HIST1H2BI;H2BFK;HIST1H2BD;H2BFB;HIRIP2;HIST1H2BM;H2BFE;HIST2H2BA;H2BFS	Histone H2B type 1-N;cDNA FLJ56780, highly similar to Histone H2B type 2-F;Histone H2B type 2-F;Histone H2B type 1-H;Histone H2B type 1-L;histone cluster 1, H2bg;Histone H2B type 1-D;Histone H2B type 1-M;cDNA FLJ56787, highly similar to Histone H2B type 2-F;Histone H2B;Histone H2B type F-S;Histone H2B	Q99877;A8K9J7;B2R5L4;O60814;A8K7P7;B4DLA9;Q5QNW6;A8K0U9;Q93079;B2R541;Q99880;B2R5A3;P62807;B2R4S9;P58876;Q99879;B4DR52;Q3KP43;A0AVI3;P57053;Q0D2M2	0.967	2.0278	0.99652
FKBP4	FK506-binding protein 4	Q02790;B2R9U2	1.4381	1.2361	1.3151
NSDHL;H105E3	Sterol-4-alpha-carboxylate 3-dehydrogenase, decarboxylating;28 kDa protein	Q15738	1.4921	1.2812	1.2151
COG8	cDNA FLJ55996, highly similar to Conserved oligomeric Golgi complex component 8	Q96MW5;B4DYU2		1.3277
HINT2	Histidine triad nucleotide-binding protein 2	Q9BX68;Q53HJ8;Q5TCW3;Q8WYJ5	1.533	1.226	1.2239
ACAA2	Putative uncharacterized protein ACAA2 (Fragment);3-ketoacyl-CoA thiolase, mitochondrial	A8MVT9;P42765;B2RB23;B3KNP8	1.4145	1.2918	1.2696
SLC25A5;ANT2	ADP/ATP translocase 2	P05141;B2RCV1;Q6NVC0	1.4323	1.3217	1.2217
GRHPR;GLXR;MSTP035;RP11-397D12.2-004	Glyoxylate reductase/hydroxypyruvate reductase;GRHPR protein (Fragment);Glyoxylate reductase/hydroxypyruvate reductase	Q9UBQ7;Q5T945;Q5M7Z5;Q5T946	1.3962	1.3016	1.2778
HLA-DQB1;DAMC-134I7.2-002;HLA-DQ	Major histocompatibility complex, class II, DQ beta 1;Major histocompatibility complex, class II, DQ beta 1;Major histocompatibility complex, class II, DQ beta 1	B0V1U9;P79526;P79551;Q30075;Q45FY0;Q5Y7G8;Q67AK6;Q67AK7;Q67AK8;Q67AK9;Q67AL0;Q67AL1;Q67AL2;Q67AL3;Q67AL4;Q67AL5;Q9MYH2;A4FRB6;A9YQ99;A9YQA0;B0V1V1;B1GXI3;O78045;O78198;O98202;Q0E4V9;Q1HCM4;Q1M313;Q29922;Q29965;Q2A663;Q2QK85;Q30090;Q30102;Q5G841;Q8SND1;Q8SP70;Q95466	1.2792	1.2561	1.4309
CKAP4	Isoform 1 of Cytoskeleton-associated protein 4;Similar to cytoskeleton-associated protein 4 (Fragment);Isoform 2 of Cytoskeleton-associated protein 4	Q07065-1;Q07065;Q8TB01;Q07065-2;B3KVX6;Q6NWZ1	1.3234	1.3187
DNAJC3;P58IPK;PRKRI	Isoform 1 of DnaJ homolog subfamily C member 3	Q13217-1;Q13217;A8KA82		1.3197
SSR3;TRAPG	cDNA FLJ52061, highly similar to Translocon-associated protein subunit gamma	Q9UNL2;B2R7D0;B4E2P2	1.3581	1.3303	1.2705
ATP6V1H;CGI-11	Isoform 1 of V-type proton ATPase subunit H;Isoform 2 of V-type proton ATPase subunit H;cDNA FLJ58444, highly similar to Vacuolar ATP synthase subunit H	Q9UI12-1;Q9UI12;B3KMR0;B3KUZ7;Q8TF11;Q9UI12-2;B4E054	1.4738	1.1649
CD74;DHLAG	Isoform Long of HLA class II histocompatibility antigen gamma chain	P04233-1;P04233;B4DNE8;O78208	1.5172		1.1207
ALG5;HSPC149	Dolichyl-phosphate beta-glucosyltransferase;cDNA FLJ54134, highly similar to Dolichyl-phosphate beta-glucosyltransferase;cDNA FLJ56758, highly similar to Dolichyl-phosphate beta-glucosyltransferase	Q9Y673;Q5TBA6;Q9HC03;B4DR37;B4DR67			1.3166
HMOX2;HO2	Heme oxygenase 2	P30519;A8MT35;B3KSE0;Q53HF1;Q6FHB5;Q6IBP2	1.4726	1.1955	1.281
C17orf61	UPF0451 protein C17orf61;7 kDa protein	Q8N2U0		1.3159
M6PR;MPR46;MPRD	Cation-dependent mannose-6-phosphate receptor;9 kDa protein	P20645;A8K528;B2R6S2;Q53GY9;Q6I9U3;Q96AH2		1.4504	1.1777
VCP	Transitional endoplasmic reticulum ATPase	P55072;B2R5T8;Q0IIN5;Q0V924;Q2TAI5;Q96IF9;Q9HAP0;Q9HAP1;Q9NTC4	1.3299	1.3178	1.2944
BCAP31;BAP31;DXS1357E	cDNA FLJ43643 fis, clone STOMA2008546, highly similar to B-cell receptor-associated protein 31;21 kDa protein;21 kDa protein;21 kDa protein	P51572;B3KQ79;Q53G72;Q53HT6	1.2603	1.3859	1.2948
MTCH2;MIMP;HSPC032	Mitochondrial carrier homolog 2	Q9Y6C9;B2R7L8;B4DHQ0;Q53G34	1.3998	1.2674	1.2685
HLA-DRA;HLA-DRA1;XXbac-BCX213L12.1-002;XXbac-BPG290C9.1-002;HLA-DQA1/DRA	HLA class II histocompatibility antigen, DR alpha chain;major histocompatibility complex, class II, DR alpha precursor;Major histocompatibility complex, class II, DR alpha;Major histocompatibility complex, class II, DR alpha;MHC class II antigen	P01903;B0UXD8;A1A436;B4DLJ8;B4DVL4;O19670;O19716;O19720;Q59GE3;Q5SP06;Q29868;Q30118;Q7YPT8	1.2998	1.3513	1.2845
ADAM10;KUZ;MADM	ADAM 10;Putative uncharacterized protein ADAM10;25 kDa protein;15 kDa protein	O14672;A0AV88;A8MXI9;A8MY20;B4DU28		1.311
FH	Isoform Mitochondrial of Fumarate hydratase, mitochondrial;Isoform Cytoplasmic of Fumarate hydratase, mitochondrial	P07954-1;P07954;B1ANK7;P07954-2	1.3698	1.297	1.2651
HIST1H2AB;H2AFM;HIST1H2AC;H2AFL;HIST3H2A	Histone H2A type 1-B/E;Histone H2A type 1-C;Histone H2A type 3	P04908;B2R5B3;Q08AJ9;Q93077;B2R4F7;Q7L7L0;B2R4S4	0.97811	1.956	0.99309
VAMP8	Vesicle-associated membrane protein 8	Q9BV40	1.4786	1.2004	1.2436
GSR;GLUR;GRD1	Isoform Mitochondrial of Glutathione reductase, mitochondrial;Isoform Cytoplasmic of Glutathione reductase, mitochondrial	P00390-1;P00390;Q03504;P00390-2	1.3803	1.1869	1.353
HIBCH	46 kDa protein;Isoform 1 of 3-hydroxyisobutyryl-CoA hydrolase, mitochondrial;Isoform 2 of 3-hydroxyisobutyryl-CoA hydrolase, mitochondrial	Q6NVY1-1;Q6NVY1;Q6NVY1-2	1.4586	1.1755	1.285
COQ6;CGI-10	Ubiquinone biosynthesis monooxygenase COQ6	Q9Y2Z9;Q53GG6	1.0194	1.86	1.0393
GALK1;GALK	cDNA FLJ56840, highly similar to Galactokinase;Putative uncharacterized protein GALK1;CDNA FLJ26554 fis, clone LNF01773, highly similar to Galactokinase	P51570;B2RC07;B4E1A8;B4E1G6;Q71UH7;A6NJD0;Q6ZP37		1.3056
UTP15	U3 small nucleolar RNA-associated protein 15 homolog	Q8TED0;B4DU75;B4DXK8		1.3048
CMTM6;CKLFSF6	CKLF-like MARVEL transmembrane domain-containing protein 6	Q9NX76;Q6IAC4		1.3048
DHRS7;DHRS7A;RETSDR4;CGI-86;UNQ285/PRO3448;DKFZp564H1664	Isoform 1 of Dehydrogenase/reductase SDR family member 7;Isoform 2 of Dehydrogenase/reductase SDR family member 7;Putative uncharacterized protein DKFZp564H1664	Q9Y394-1;Q9Y394;B2R896;Q9Y394-2;Q659E8	1.5112	1.1569	1.2461
ICAM1;ICAM-1;P3.58	Intercellular adhesion molecule 1;Intercelular adhesion molecule 1;cDNA FLJ53641, highly similar to Intercellular adhesion molecule 1	P05362;B2R6M3;B4DNT6;Q5NKV8;O00177;B4DQW5;Q15463	1.6349	1.3058	0.97158
ZCCHC8	Isoform 1 of Zinc finger CCHC domain-containing protein 8;Isoform 2 of Zinc finger CCHC domain-containing protein 8;27 kDa protein;20 kDa protein	Q6NZY4-1;Q6NZY4;A8K559;Q6NZY4-2	1.3023
GNPDA1;GNPI;HLN;KIAA0060;GNPDA2	Glucosamine-6-phosphate isomerase 1;Isoform 1 of Glucosamine-6-phosphate isomerase 2;Isoform 3 of Glucosamine-6-phosphate isomerase 2;Isoform 2 of Glucosamine-6-phosphate isomerase 2;cDNA FLJ12717 fis, clone NT2RP1001253, highly similar to Glucosamine-6-phosphate isomerase	P46926;A8K3S1;Q8TDQ7-1;Q8TDQ7;B4DJF3;Q2VYF1;Q8TDQ7-3;Q8TDQ7-2;B3KMV2	1.2703	1.3493	1.2854
HIST2H3A;HIST2H3C;H3F2;H3FM;HIST2H3D;HIST3H3;H3FT	Histone H3.2;Histone H3.1t;cDNA FLJ52843, highly similar to Histone H3.3;Histone H3-like;cDNA FLJ57905, moderately similar to Histone H3.3	Q71DI3;Q16695;B2R5K3;B4E380;Q6NXT2;B4DEB1	0.91323	2.0475	0.94164
TXN;TRDX;TRX;TRX1;RP11-427L11.1-002;hCG_28763	Thioredoxin;Thioredoxin	P10599;Q9UDG5;B1ALW1;O60744	1.3963	1.2274	1.2747
TCL1A;TCL1	T-cell leukemia/lymphoma protein 1A	P56279	1.3046	1.2672	1.3225
ICK;KIAA0936	Isoform 1 of Serine/threonine-protein kinase ICK;Isoform 2 of Serine/threonine-protein kinase ICK	Q9UPZ9-1;Q9UPZ9;A7MD41;B3KQG4;Q9UPZ9-2			1.2979
SPRYD4	SPRY domain-containing protein 4	Q8WW59;A8K7A5;B4DUC9	1.3633	1.2305
AGK;MULK	Isoform 1 of Acylglycerol kinase, mitochondrial	Q53H12-1;Q53H12;A4D1U5;B4DR72;B4E2Z8	1.3155	1.4034	1.1714
SERPINB9;PI9	Serpin B9	P50453;B2RBW3;Q6N0A8	1.3362	1.2135	1.3384
SPN;CD43	Leukosialin;36 kDa protein	P16150;A8K9B1	1.3654	1.2133	1.3094
CLTC;CLH17;CLTCL2;KIAA0034	Isoform 1 of Clathrin heavy chain 1;Isoform 2 of Clathrin heavy chain 1	Q00610-1;Q00610;Q49AL0;Q00610-2	1.3095	1.1347	1.4435
PSMB5;LMPX	Proteasome subunit beta type-5;proteasome beta 5 subunit isoform 2	P28074;B2R4N9	1.3225	1.3403	1.2201
DNAJB11;EDJ;ERJ3;PSEC0121;UNQ537/PRO1080	DnaJ homolog subfamily B member 11	Q9UBS4;B3KW63			1.2938
ALDOC;ALDC	Fructose-bisphosphate aldolase C;Fructose-bisphosphate aldolase	P09972;B2R5R3;A8MVZ9	1.0366	1.0668	1.7736
CD44;LHR;MDU2;MDU3;MIC4;AL133330.1-005	Isoform CD44 of CD44 antigen;Isoform 5 of CD44 antigen;Isoform 7 of CD44 antigen;Isoform 3 of CD44 antigen;Isoform 4 of CD44 antigen;Isoform 6 of CD44 antigen;Isoform 17 of CD44 antigen;Isoform 8 of CD44 antigen;Isoform 16 of CD44 antigen;Isoform 10 of CD44 antigen;Isoform 11 of CD44 antigen;Isoform 13 of CD44 antigen;Isoform 14 of CD44 antigen;Isoform 12 of CD44 antigen;cDNA FLJ52702, highly sim…	P16070-1;P16070;P16070-5;P16070-7;P16070-3;P16070-4;B4XHE2;Q9H5A7;Q9P2Z2;P16070-6;P16070-17;P16070-8;P16070-16;P16070-10;B4E2X0;Q9H5A6;P16070-11;A5YRN9;P16070-13;P16070-14;P16070-12;A8K309;Q9H5A4;B4DN59;P16070-9;P16070-15;Q9H5A3;Q9UC28;Q9UC29;Q9UC30	1.1724	1.2766	1.4267
LPXN;LDLP	cDNA FLJ58628, highly similar to Leupaxin;Putative uncharacterized protein LPXN (Fragment)	O60711;B2R8B4;B4DV71;B4DVI1;Q53FW6;Q6FI07;A8MVU0	1.354	1.3056	1.216
FLOT1;DADB-118P11.2-009;DASS-191K16.3-009;XXbac-BCX111D4.4-009;XXbac-BPG252P9.2-009;DAMA-26D6.5-001	Flotillin-1;cDNA FLJ54943, highly similar to Flotillin-1;Flotillin 1;Flotillin 1	O75955;Q53HQ0;Q5ST80;Q6IB58;A2VCL5;B0V109;B4DVY7;A2AB12;Q5JP64;B0S8A9	1.5971	1.0905	1.1814
SDHALP2	Pseudogene candidate;SDHALP2 protein;SDHALP2 protein	Q05BC2;Q05BB6			1.2894
UBL4A;XX-FW89031B12.1-002;DXS254E;GDX;UBL4	Ubiquitin-like 4A;Ubiquitin-like protein 4A;cDNA FLJ59175, weakly similar to Ubiquitin-like protein 4A	Q5HY81;P11441;Q5HY80;B4DDK5		1.2875
CCDC56;HSPC009	Coiled-coil domain-containing protein 56	Q9Y2R0;A8K498		1.2871
DUSP3;VHR	23 kDa protein;Dual specificity protein phosphatase 3;DUSP3 protein	P51452;B5BUI8;Q5U0J1;Q8IYJ9		1.07	1.503
SLC25A13;ARALAR2	Solute carrier family 25, member 13 (Citrin), isoform CRA_a	Q9UJS0;Q53GR7;Q546F9;Q75KX8;Q75M55	1.3917	1.1804
FSCN1;FAN1;HSN;SNL	FSCN1 protein (Fragment);Fascin	Q96IH1;Q16658;B2RE97;B3KTA3	1.2644	1.3125	1.2787
GSTP1;FAEES3;GST3	Glutathione S-transferase P;Putative uncharacterized protein GSTP1	P09211;A8MX94;B2C310	1.2092	1.2932	1.3505
SDF2L1;UNQ1941/PRO4424	Dihydropyrimidinase-like 2	Q9HCN8;A2RUD3;Q86U75	1.443	1.2781	1.1316
PPIB;CYPB	Peptidyl-prolyl cis-trans isomerase B;20 kDa protein	P23284	1.3017	1.3428	1.2077
CHURC1;C14orf52;CHCH;My015	Isoform 1 of Protein Churchill;cDNA FLJ59570, highly similar to Protein farnesyltransferase subunit beta;Isoform 2 of Protein Churchill	Q8WUH1-1;Q8WUH1;B3KQ81;B4DL54;Q8WUH1-2	1.4419	1.0761	1.3332
ARL6IP1;ARL6IP;KIAA0069	ADP-ribosylation factor-like protein 6-interacting protein 1	Q15041;A8K522	1.3727	1.3147	1.1618
UQCR10;UCRC;HSPC119;hCG_1641518	Cytochrome b-c1 complex subunit 9;HSPC051;HSPC151;similar to ubiquinol-cytochrome c reductase complex	Q9UDW1;Q9NZY4;Q9UI02;B5MCM5;Q9P012		1.3304	1.2352
NDUFS7	NADH dehydrogenase [ubiquinone] iron-sulfur protein 7, mitochondrial;NADH dehydrogenase [ubiquinone] iron-sulfur protein 7, mitochondrial precursor;My017 protein;Putative uncharacterized protein NDUFS7;cDNA FLJ78321;cDNA FLJ46880 fis, clone UTERU3015299, highly similar to NADH-ubiquinone oxidoreductase 20 kDa subunit, mitochondrial	O75251;Q7LD69;Q9H3K5;Q8NAS7;A8K0V6;B3KRI2;Q6ZQU6	1.3727	1.0809	1.3901
ILKAP	Integrin-linked kinase-associated serine/threonine phosphatase 2C	Q9H0C8;B3KM39		0.60529	1.9566
ECH1	Delta(3,5)-Delta(2,4)-dienoyl-CoA isomerase, mitochondrial	Q13011;A8K745	1.3015	1.197	1.3438
ATP2A2;ATP2B	Isoform SERCA2B of Sarcoplasmic/endoplasmic reticulum calcium ATPase 2;Putative uncharacterized protein ATP2A2;Isoform SERCA2A of Sarcoplasmic/endoplasmic reticulum calcium ATPase 2;ATPase, Ca++ transporting, slow twitch 2 isoform 3	P16615-1;P16615;A6NDN7;P16615-2;B0FYL2;B1PM99;B4DF05	1.345	1.22	1.2761
NIPSNAP3A;NIPSNAP4;HSPC299	32 kDa protein;Protein NipSnap homolog 3A	Q9UFN0;B4DW81	1.2495	1.2599	1.3303
TLN1;KIAA1027;TLN	Talin-1	Q9Y490;Q5TCU6	1.2729	1.2077	1.3518
DLD;GCSL;LAD;PHE3	cDNA FLJ50661, highly similar to Dihydrolipoyl dehydrogenase, mitochondrial;Dihydrolipoyl dehydrogenase, mitochondrial	B4DT69;P09622;B2R5X0;B4DFL1;B4DHG0;B4DMK9	1.373	1.2091	1.249
CISD1;C10orf70;ZCD1;MDS029	CDGSH iron sulfur domain-containing protein 1	Q9NZ45	1.3811	1.1314	1.3178
DKFZp686M24262;ACADM	Putative uncharacterized protein DKFZp686M24262;acyl-Coenzyme A dehydrogenase, C-4 to C-12 straight chain isoform b precursor;Medium-chain specific acyl-CoA dehydrogenase, mitochondrial	Q5HYG7;Q5T4U5;P11310;B4DJE7;B4DVB1;B4DVE0;B4DWX6;Q5T4U4	1.3493	1.2238	1.2554
H2AFZ;H2AZ;H2AFV;H2AV;hCG_19242	Histone H2A.Z;Histone H2A.V;13 kDa protein;H2A histone family, member V isoform 2;H2A histone family, member V isoform 3;H2A histone family, member V isoform 5	P0C0S5;B2RD56;Q71UI9;A6NN01;A6NKY0;A6NFA8	1.0385	1.8324	0.95444
TMCO1;TMCC4;PNAS-10;PNAS-136;UNQ151/PRO177	Isoform 1 of Transmembrane and coiled-coil domain-containing protein 1;Isoform 2 of Transmembrane and coiled-coil domain-containing protein 1	Q9UM00-1;Q9UM00;B2REA0;Q9UM00-2	1.2022	1.3633	1.2575
FAM96A	UPF0195 protein FAM96A;family with sequence similarity 96, member A isoform b;8 kDa protein	Q9H5X1;B2R5F8;A6NKS1			1.2739
TNFAIP8L2	Tumor necrosis factor, alpha-induced protein 8-like protein 2	Q6P589	1.1963	1.3484
GNB2	Guanine nucleotide-binding protein G(I)/G(S)/G(T) subunit beta-2;28 kDa protein;26 kDa protein;17 kDa protein	P62879;B3KPU1;Q6FHM2	1.1812	1.4361	1.1967
NDUFA13;GRIM19;CGI-39;CDA016	NADH dehydrogenase (ubiquinone) 1 alpha subcomplex, 13;cDNA FLJ58045, highly similar to NADH dehydrogenase (ubiquinone) 1 alpha subcomplex subunit 13;cDNA FLJ57958, highly similar to NADH dehydrogenase (ubiquinone) 1 alpha subcomplex subunit 13	Q9P0J0;B4DF76;B4DQP1;B4DEZ3	1.2682	1.3241	1.2174
NDUFB11;UNQ111/PRO1064	Isoform 2 of NADH dehydrogenase [ubiquinone] 1 beta subcomplex subunit 11, mitochondrial;Neuronal protein	Q9NX14-2;Q9NX14;Q9NX14-1;Q7Z4X2	1.3593	1.1793
MAP3K4;KIAA0213;MAPKKK4;MEKK4;MTK1	mitogen-activated protein kinase kinase kinase 4 isoform a;Putative uncharacterized protein MAP3K4;Isoform B of Mitogen-activated protein kinase kinase kinase 4	Q9Y6R4-1;Q9Y6R4;A6H8W0;Q9H408;A8MVL6;Q9Y6R4-2;Q5VTT9;Q9P1M2	1.268
DNPEP;ASPEP;DAP;hCG_15581	aspartyl aminopeptidase;52 kDa protein;48 kDa protein;DNPEP protein (Fragment);cDNA FLJ10915 fis, clone OVARC1000288, weakly similar to VACUOLAR AMINOPEPTIDASE I;37 kDa protein	Q9ULA0;Q53SB6;Q9BSS9;Q9HAC6;Q9NV55			1.2679
ACTN2	Alpha-actinin-2	P35609;B1ANE4;B2RCS5;Q59FD9	1.4288	1.0628	1.3114
NUP210;KIAA0906;PSEC0245	Isoform 1 of Nuclear pore membrane glycoprotein 210	Q8TEM1-1;Q8TEM1	1.3208	1.1182	1.364
ADPRH;ARH1	[Protein ADP-ribosylarginine] hydrolase	P54922;A8K6X2;B2R8H1	1.2516		1.2819
NDUFB4	NADH dehydrogenase [ubiquinone] 1 beta subcomplex subunit 4;NADH dehydrogenase (Ubiquinone) 1 beta subcomplex, 4, 15kDa;8 kDa protein	O95168;B2RUY3;Q8N4D3	1.4378	1.1525	1.207
NT5C2;NT5B;NT5CP;PNT5;RP11-30H12.3-009	Cytosolic purine 5'-nucleotidase;cDNA FLJ45768 fis, clone NETRP2000961, highly similar to Cytosolic purine 5'-nucleotidase;5'-nucleotidase, cytosolic II	P49902;A8K6K2;B3KXN5;Q5JUV6	1.0823	1.3737	1.3386
ACACA;ACAC;ACC1;ACCA	Isoform 4 of Acetyl-CoA carboxylase 1;Isoform 1 of Acetyl-CoA carboxylase 1;265 kDa protein;Isoform 2 of Acetyl-CoA carboxylase 1;Isoform 3 of Acetyl-CoA carboxylase 1	Q13085-4;Q13085;B2RP68;Q13085-1;B2ZZ90;Q13085-2;Q13085-3;B4DIG6;B4DIR2;B4DIW1;B4DK31;B4DWK9;Q59FY4;Q7Z5W8		1.2647
B2M;CDABP0092;HDCMA22P	cDNA FLJ57067, highly similar to Beta-2-microglobulin;Beta-2-microglobulin	A6XMH5;A6XND9;B4E0X1;Q6IAT8;Q9UCK0;Q9UD48;Q9UM88;P61769;Q540F8	1.441	1.1489	1.2034
HADHB;MSTP029	Trifunctional enzyme subunit beta, mitochondrial;Putative uncharacterized protein HADHB	P55084;B2RB16;B4DDC9;B4DY96;B4E2W0;B5MD38	1.3156	1.2401	1.2372
MEPCE;BCDIN3	7SK snRNA methylphosphate capping enzyme	Q7L2J0;A8K5Q1;B3KP86		1.2642
CUTA;ACHAP;C6orf82	Isoform A of Protein CutA;Isoform B of Protein CutA;Isoform C of Protein CutA	O60888-2;O60888;O60888-1;O60888-3	1.3876	1.14	1.2646
PLS3	plastin 3	P13797;A7E2S2;A8K579;B4DG31;B4DGB4;B4DI60;B4DPW9;Q53GY0;Q96HI1		1.264
CD59;MIC11;MIN1;MIN2;MIN3;MSK21	CD59 glycoprotein	P13987;Q6FHM9	1.3591	1.0823	1.3505
ITPR2	Isoform Long of Inositol 1,4,5-trisphosphate receptor type 2	Q14571-1;Q14571	1.4632	1.0623
ABR	Isoform Long of Active breakpoint cluster region-related protein;Isoform Short of Active breakpoint cluster region-related protein;cDNA FLJ44934 fis, clone BRAMY3017920, highly similar to Active breakpoint cluster region-related protein	Q12979-1;Q12979;B3KW89;Q12979-2;Q6ZT60		1.2624
DASS-67H14.3-001;TAP1;ABCB2;PSF1;RING4;Y3	Transporter 1 ATP-binding cassette sub-family B;Antigen peptide transporter 1	B1AZV3;Q03518;B2R9F3;Q12847;Q12848;Q13013;Q16148;Q53WZ1;Q69DM1;Q6QWC0;Q6QWC1;Q8TD77;Q9UEE1	1.4103	1.2571	1.1191
CTSH;CPSB;DKFZp686B24257	Cathepsin H;Cathepsin H	P09668;B2RBK0;Q6IBC3;Q68D46;Q6LAF8;Q96NY6	1.2789	1.3366	1.1693
PREX1;KIAA1415	Isoform 1 of Phosphatidylinositol 3,4,5-trisphosphate-dependent Rac exchanger 1 protein;Isoform 3 of Phosphatidylinositol 3,4,5-trisphosphate-dependent Rac exchanger 1 protein;Isoform 2 of Phosphatidylinositol 3,4,5-trisphosphate-dependent Rac exchanger 1 protein	Q8TCU6-1;Q8TCU6;Q8TCU6-3;Q8TCU6-2		1.2612
ATP6V1D;ATP6M;VATD	V-type proton ATPase subunit D	Q9Y5K8;B2RE33;Q6PJ05;Q8N5Z9;Q9H3H0		1.3363	1.1839
TMEM32	cDNA FLJ54627, highly similar to Homo sapiens transmembrane protein 32 (TMEM32), mRNA	Q8N4V1;B2R625;B4DIY3	1.4596	1.2212	1.0953
THEM2;HT012;PNAS-27	Thioesterase superfamily member 2	Q9NPJ3	1.4044	1.2583	1.1104
IKBKB;IKKB	Inhibitor of nuclear factor kappa-B kinase subunit beta;cDNA FLJ77419;IKBKB protein;29 kDa protein	O14920;A1L159;B3KRB7;B4DP95;B4DZ30;B4E0U4;A8K4I7;B4E0A7;Q32ND9		1.2574
COX7A2L;COX7AR;COX7RP	Cytochrome c oxidase subunit 7A-related protein, mitochondrial;Putative uncharacterized protein COX7A2L;Putative uncharacterized protein COX7A2L	O14548;Q6FGA0;A8MZH9;B5MD01		1.257
ASNS;TS11	Asparagine synthetase [glutamine-hydrolyzing]	P08243;A4D1I8;B4DXZ1;B4DY32	1.3483	1.2369	1.1828
FAM36A	Isoform 2 of Protein FAM36A;Isoform 1 of Protein FAM36A	Q5RI15-2;Q5RI15;Q5RI15-1;B3KM21	1.4136	1.1676	1.1853
MAP2K1IP1;PRO2783	Mitogen-activated protein kinase kinase 1-interacting protein 1	Q9UHA4;B2R4A1;Q53FH6	1.4626	1.039	1.2634
NDUFB5	NADH dehydrogenase [ubiquinone] 1 beta subcomplex subunit 5, mitochondrial;22 kDa protein;NDUFB5 protein	O43674;B2R9L0;Q05D62;Q561V6	1.4691	1.2978	0.99734
NDUFB3	NADH dehydrogenase [ubiquinone] 1 beta subcomplex subunit 3	O43676;Q6IB80	1.3914	1.1092	1.2635
GPHN;GPH;KIAA1385	Isoform 2 of Gephyrin;Isoform 1 of Gephyrin	Q9NQX3-2;Q9NQX3;B2RDJ7;Q9NQX3-1;Q96KU4		1.1456	1.3638
CRYM;THBP	Mu-crystallin homolog;crystallin, mu isoform 2	Q14894;Q5HYB7	1.1651		1.3425
	Uncharacterized protein ENSP00000383768 (Fragment)	A8MX45	1.2524
RAB5B;hCG_25009	Ras-related protein Rab-5B;cDNA FLJ60627, highly similar to Ras-related protein Rab-5B	P61020;A8K982;Q6FI54;B4DKD7	1.2949	1.2093
FKBP11;FKBP19;UNQ336/PRO535	FK506-binding protein 11;16 kDa protein;cDNA FLJ53772, highly similar to FK506-binding protein 11;15 kDa protein;10 kDa protein	Q9NYL4;B4DWB7	1.3717	1.1881	1.1937
SEC63;SEC63L	Translocation protein SEC63 homolog;cDNA FLJ43868 fis, clone TESTI4008050, highly similar to Translocation protein SEC63 homolog;cDNA FLJ14468 fis, clone MAMMA1000734, highly similar to Translocation protein SEC63 homolog	Q9UGP8;B3KQF0;B3KWU4;B3KNE7	1.4215	1.0808	1.2511
NFKB1	Isoform 2 of Nuclear factor NF-kappa-B p105 subunit;Isoform 1 of Nuclear factor NF-kappa-B p105 subunit	P19838-2;P19838;A8K5Y5;P19838-1;B3KVE8	1.6885	1.1063	0.95795
DKFZp686P03159;ANXA2;ANX2;ANX2L4;CAL1H;LPC2D;ANXA2P2;ANX2L2;ANX2P2;LPC2B	annexin A2 isoform 1;Annexin A2;Putative annexin A2-like protein;24 kDa protein;cDNA FLJ34687 fis, clone MESAN2000620, highly similar to Annexin A2;cDNA FLJ59138, highly similar to Annexin A2	Q6N0B3;Q8TBV2;P07355;A6NMY6;B3KRQ1;B4DNH8	1.3593	1.1188	1.2737
EPS15;AF1P	Epidermal growth factor receptor substrate 15;Putative uncharacterized protein EPS15 (Fragment);EPS15 protein	P42566;B2R8J7;A8MWH5;A8MWB7;B1AUU8;Q7Z5V0		1.1433	1.3579
HLA-A;HLAA	HLA class I histocompatibility antigen, A-24 alpha chain;Leukocyte antigen	P05534;Q95J06;A0EVJ8;A0PFT8;A0PFV6;A0PFV7;A0SY05;A1DZU4;A1E126;A1E127;A1E2T0;A1Z0L6;A2BCQ4;A2BCQ5;A2RQE0;A2TEL8;A2TH17;A2VBX7;A2VBX8;A2VBZ7;A2VC06;A3FEL9;A3KLI6;A4GWZ0;A4GWZ1;A4URG8;A4USG7;A4USH0;A4USH1;A4USH3;A4UUL3;A4ZW41;A5A4L6;A5A8M6;A5CLH5;A5HBZ4;A5HJL0;A5HKN9;A5JSF7;A5JSF8;A5JSF9;A5JSG0;A5JSG1;A5JSG3;A5PHT7;A5YVG3;A5YVG4;A5YVG5;A5YVG6;A6N9E1;A6YT92;A7BKB6;A7L3S8;A7L5M0;A7LKN0;A7MAE1;A7MAP3;…	1.4248	1.1733	1.1528
USMG5;HCVFTP2;PD04912	Up-regulated during skeletal muscle growth protein 5;7 kDa protein	Q96IX5;B2R4N2	1.5092	1.285	0.95483
GPD2	Isoform 1 of Glycerol-3-phosphate dehydrogenase, mitochondrial;Isoform 2 of Glycerol-3-phosphate dehydrogenase, mitochondrial	P43304-1;P43304;A8K1Z2;A8K4V0;Q53RD0;Q53T76;Q8WUQ0;P43304-2;B3KSA9		1.2491
AGL;GDE;hCG_31497	Putative uncharacterized protein AGL (Fragment);Isoform 1 of Glycogen debranching enzyme;amylo-1, 6-glucosidase, 4-alpha-glucanotransferase isoform 3;Isoform 6 of Glycogen debranching enzyme;Isoform 5 of Glycogen debranching enzyme	Q59H92;P35573-1;P35573;A6NCX7;P35573-3;P35573-2	1.3417	1.2458	1.1596
C7orf23	Transmembrane protein C7orf23	Q9BU79;B2R9I4		1.249
SAMM50;CGI-51	Putative uncharacterized protein SAMM50;Sorting and assembly machinery component 50 homolog	A8MZI2;Q9Y512;B4DN54;Q53HC4;Q56VW7	1.3225	1.1698	1.252
STX7	Isoform 1 of Syntaxin-7;Isoform 2 of Syntaxin-7;cDNA FLJ53760, highly similar to Syntaxin-7	O15400-1;O15400;O15400-2;B4DH37	1.7153	1.0179	1.0107
ATP1B3	Sodium/potassium-transporting ATPase subunit beta-3;30 kDa protein;16 kDa protein;15 kDa protein	P54709	1.4422	1.1703	1.1293
HLA-DQA1	HLA class II histocompatibility antigen, DQ(1) alpha chain;HLA-DQA1 protein;MHC class II antigen;similar to major histocompatibility complex, class II, DQ alpha 1;HLA class II histocompatibility antigen, DQ(2) alpha chain;hypothetical protein isoform 2	P01908;Q30063;Q30069;Q5Y7F5;Q67AF6;Q67AF7;Q67AF8;Q67AF9;Q67AG0;P04225;Q29885;Q2LIQ8;Q2LIR1;Q30070;Q5Y7C3;Q5Y7H0;Q67AE8;Q67AE9;Q67AF0;Q67AF1;Q67AF2;Q67AF3;Q67AF4;Q67AF5;Q9UM30;P04226;O19704;Q08AS3;Q67AG1;Q67AG2;Q67AG3;Q67AG4;Q67AG5;Q67AG6;Q6ICU6	1.2052	1.2849	1.2496
NT5C3;P5N1;UMPH1;HSPC233	Isoform 2 of Cytosolic 5'-nucleotidase 3;Isoform 1 of Cytosolic 5'-nucleotidase 3;Isoform 3 of Cytosolic 5'-nucleotidase 3;Isoform 4 of Cytosolic 5'-nucleotidase 3	Q9H0P0-4;Q9H0P0;A8K253;Q9H0P0-1;Q9H0P0-2;B2RAA5;Q9H0P0-3	1.09	1.572	1.0767
PLCG2	1-phosphatidylinositol-4,5-bisphosphate phosphodiesterase gamma-2	P16885;B4E3H3	1.2559	1.201	1.2799
GNG2	Guanine nucleotide-binding protein G(I)/G(S)/G(O) subunit gamma-2	P59768;Q5JPE2			1.245
TRAPPC6B	Isoform 1 of Trafficking protein particle complex subunit 6B;Isoform 2 of Trafficking protein particle complex subunit 6B;cDNA FLJ50482, moderately similar to Trafficking protein particle complex subunit6B	Q86SZ2-1;Q86SZ2;Q49AS8;Q5JPD6;Q86SZ2-2;B3KPS2;B4DFZ8		1.2442
DCI	Isoform 1 of 3,2-trans-enoyl-CoA isomerase, mitochondrial;Isoform 2 of 3,2-trans-enoyl-CoA isomerase, mitochondrial	P42126-1;P42126;A8K512;Q96DC0;P42126-2	1.2178	1.2905	1.2231
TPP2	Tripeptidyl-peptidase 2	P29144	1.2949	1.2284	1.1964
KIAA0564	Isoform 1 of Uncharacterized protein KIAA0564;Isoform 2 of Uncharacterized protein KIAA0564;Isoform 3 of Uncharacterized protein KIAA0564	A3KMH1-1;A3KMH1;A3KMH1-2;B3KT81;A3KMH1-3		1.2396
LYPLAL1	Isoform 1 of Lysophospholipase-like protein 1;Isoform 2 of Lysophospholipase-like protein 1	Q5VWZ2-1;Q5VWZ2;A8K677;B3KVW3;Q5VWZ2-2	1.219	1.2218	1.2774
ATPAF2;ATP12;LP3663	ATP synthase mitochondrial F1 complex assembly factor 2;23 kDa protein	Q8N5M1			1.2394
OXCT1;OXCT;SCOT	Succinyl-CoA:3-ketoacid-coenzyme A transferase 1, mitochondrial	P55809;A1E286;B2R5V2;Q6IAV5	1.2538	1.1668	1.2941
ITGB2	Integrin beta (Fragment)	Q59H50;Q96PT7;Q9UD72		1.2381
SRI	Sorcin;sorcin isoform b	P30626;B4DHQ6;Q75MZ6;A8MTH6;B4DKK2	1.3466	1.1297	1.236
CD81;TAPA1;TSPAN28	Putative uncharacterized protein CD81;CD81 antigen	A6NMH8;P60033	1.3358	1.1215	1.2548
CALM1;CALM;CAM;CAM1;CALM2;CAM2;CAMB;CALM3;CALML2;CAM3;CAMC;CAMIII	cDNA FLJ75174, highly similar to Homo sapiens calmodulin 1 (phosphorylase kinase, delta), mRNA;Calmodulin;CALM3 protein	A8K1M2;P62158;B2RDW0;B4DJ51;Q96HY3;Q9BRL5	1.258	1.164	1.2887
UQCRH;hCG_22091	Cytochrome b-c1 complex subunit 6, mitochondrial;Ubiquinol-cytochrome c reductase hinge protein, isoform CRA_c	P07919;B2R4V9;Q567R0		1.2364
EXOSC7;KIAA0116;RRP42	Exosome complex exonuclease RRP42;cDNA FLJ58391, highly similar to Exosome complex exonuclease RRP42	Q15024;B2RDZ9;B4DIU0		1.5377	0.9334
PEA15;RP11-536C5.8-002;hCG_39732	Phosphoprotein enriched in astrocytes 15, isoform CRA_b;Astrocytic phosphoprotein PEA-15	B1AKZ3;Q6FHL9;Q15121;B1AKZ4	1.2422	1.2223	1.2417
LONP1;PRSS15	Lon protease homolog, mitochondrial;cDNA FLJ45970 fis, clone PLACE7016526, highly similar to Lon protease homolog, mitochondrial;Putative uncharacterized protein	P36776;B4DPX0;Q2VPA0;B3KPH8;B3KU28;B3KXS5;Q8N8K8;A4VCH6;Q9BSN5	1.2434	1.2207	1.242
COMT	Isoform Membrane-bound of Catechol O-methyltransferase;Isoform Soluble of Catechol O-methyltransferase;24 kDa protein;26 kDa protein	P21964-1;P21964;P21964-2;Q9BWC7	1.2699	1.2235	1.2108
	21 kDa protein;HLA class II histocompatibility antigen, DQ(W3) alpha chain	P05536	1.2165	1.1807	1.3064
HLA-C;HLAC	MHC class I antigen heavy chain;HLA class I histocompatibility antigen, Cw-4 alpha chain	A2BCW2;A2BCX0;A2BCY5;A7MA45;A7MAN2;B0BK81;B0FZC9;B1PC45;B1PL06;B1PMU8;B3W6H1;B5AFW1;B5AFW2;B5AU43;B5B2D3;B6ETP9;O19572;O19636;Q0PMJ9;Q0PMK0;Q1W0Z3;Q1WAA7;Q2P9S5;Q2UV94;Q30196;Q45YI9;Q53YY2;Q5F2L3;Q6UJZ6;Q704Y6;Q708F3;Q708F4;Q70P05;Q860A5;Q95HN1;Q9GJF2;Q9GJM4;P30504;Q5D1W8	1.2143	1.3744	1.1143
AARS	Alanyl-tRNA synthetase, cytoplasmic;cDNA FLJ61339, highly similar to Alanyl-tRNA synthetase	P49588;B4DR45	1.2937	1.1874	1.2216
SOD2;hCG_34035;RP1-56L9.2-003	manganese superoxide dismutase isoform A precursor;Superoxide dismutase [Mn], mitochondrial;cDNA FLJ40076 fis, clone TESTI2000874, highly similar to Superoxide dismutase;cDNA FLJ57787, moderately similar to Superoxide dismutase (Mn), mitochondrial;manganese superoxide dismutase isoform B precursor	B2R7R1;Q4ZJI1;Q7Z7M4;Q7Z7M5;Q7Z7M6;Q7Z7M7;P04179;B3KUK2;B4E3K9;B4DL20;Q5TCM0;Q6LE88;Q6LEN1;Q96AM7;Q9UG59	1.2251	1.1947	1.2815
GARS	Glycyl-tRNA synthetase	P41250;B3KQA2;B4DIA0;Q75MN1	1.2442	1.2556	1.2008
HSP90AB4P	Putative heat shock protein HSP 90-beta 4	Q58FF6		1.2326
GALE;RP5-886K2.6-007;RP5-886K2.6-015;RP5-886K2.6-005;RP5-886K2.6-008	UDP-glucose 4-epimerase;UDP-galactose-4-epimerase;UDP-galactose-4-epimerase;UDP-galactose-4-epimerase;UDP-galactose-4-epimerase	Q14376;B3KQ39;Q38G75;Q5QPP3;Q5QPP4;Q5QPP2;Q5QPP1		1.3477	1.1174
NDUFA12;DAP13	13kDa differentiation-associated protein variant (Fragment)	Q9UI09;Q53HG1;Q53XX0	1.2873	1.165	1.2434
AK3;AK3L1;AK6;AKL3L;RP11-6J24.4-001;hCG_2011468	GTP:AMP phosphotransferase mitochondrial;cDNA FLJ58032, highly similar to GTP:AMP phosphotransferase mitochondrial;Adenylate kinase 3, isoform CRA_b	Q9UIJ7;B3KWD9;Q7Z4Y4;Q7Z531;B4DP58;Q9HC01	1.346	1.2258	1.1223
HIST1H4A;H4/A;H4FA;HIST1H4B;H4/I;H4FI;HIST1H4C;H4/G;H4FG;HIST1H4D;H4/B;H4FB;HIST1H4E;H4/J;H4FJ;HIST1H4F;H4/C;H4FC;HIST1H4H;H4/H;H4FH;HIST1H4I;H4/M;H4FM;HIST1H4J;H4/E;H4FE;HIST1H4K;H4/D;H4FD;HIST1H4L;H4/K;H4FK;HIST2H4A;H4/N;H4F2;H4FN;HIST2H4;HIST2H4B;H4/O;H4FO;HIST4H4	Histone H4	P62805;B2R4R0;Q0VAS5;Q6B823	0.85532	1.9128	0.92571
EEA1;ZFYVE2	Early endosome antigen 1	Q15075;A8K7J3;Q05D76	1.3093	0.9744	1.4099
NUCB1;NUC	Nucleobindin-1;cDNA FLJ52898, highly similar to Nucleobindin-1;Protein;31 kDa protein	Q02818;A8K7Q1;B2RD64;B3KUR6;Q53GX6;Q96BA4;B4DZX0		1.2434	1.2185
NDUFAB1	Acyl carrier protein, mitochondrial	O14561;A4UCS2;A4UCS3;B2R4M1		1.2415	1.2201
ARL8B;ARL10C;GIE1;ARL8A;ARL10B;GIE2	cDNA FLJ56285, highly similar to ADP-ribosylation factor-like protein 8B;cDNA FLJ61158, highly similar to ADP-ribosylation factor-like protein 8B;ADP-ribosylation factor-like protein 8A	Q9NVJ2;B4E1J8;B4DQT8;Q96BM9;B2R7U5;B3KXD0	1.2465	1.139	1.3059
DNAJB1;DNAJ1;HDJ1;HSPF1	DnaJ homolog subfamily B member 1	P25685;B4DX52;Q6FHS4;Q6FI51		1.431	1.0299
HLA-DQB1;DASS-390M22.2-001	Major histocompatibility complex, class II, DQ beta 1	A2BF36	1.2019	1.2683	1.2193
TMEM111	Isoform 1 of Transmembrane protein 111;Isoform 2 of Transmembrane protein 111;18 kDa protein	Q9P0I2-1;Q9P0I2;B2R4Z9;Q9P0I2-2	1.1066		1.3518
NDUFS4	NADH dehydrogenase [ubiquinone] iron-sulfur protein 4, mitochondrial	O43181	1.1899	1.2684
LXN	Latexin	Q9BS40		1.0448	1.4132
DDX23	Probable ATP-dependent RNA helicase DDX23;cDNA FLJ46571 fis, clone THYMU3041428, highly similar to Probable ATP-dependent RNA helicase DDX23	Q9BUQ8;A8KA56;B2R600;B4DH15;B3KY11	0.99007	0.99985	1.697
ATP5I;ATP5K	ATP synthase, H+ transporting, mitochondrial F0 complex, subunit E	P56385			1.2282
SNX5;RP11-504H3.2-012;RP11-504H3.2-013	Sorting nexin-5;Sorting nexin 5;Sorting nexin 5	Q9Y5X3;Q53FH8;Q6P5V6;Q5QPE4;Q5QPE5	1.3399	1.0949	1.2467
PKM2;PK2;PK3;PKM	cDNA FLJ56065, highly similar to Pyruvate kinase isozyme M1;Isoform M1 of Pyruvate kinase isozymes M1/M2;cDNA FLJ53645, highly similar to Pyruvate kinase isozyme M1;Pyruvate kinase;similar to pyruvate kinase, muscle	P14618-1;P14618;B2R5N8;B3KRY0;B4DFX8;P14618-2;B4DRT3;Q504U3	1.2104	1.1955	1.275
GNAI3	Guanine nucleotide-binding protein G(k) subunit alpha	P08754;Q5TZX1	1.3305	1.4187	0.93166
VH6DJ	VH6DJ protein (Fragment)	A2N0T5			1.2252
TMEM41A;UNQ168/PRO194	Isoform 1 of Transmembrane protein 41A;Isoform 2 of Transmembrane protein 41A	Q96HV5-1;Q96HV5;A8K4B3;Q96HV5-2		1.0705	1.3796
CNDP2;CN2;CPGL;PEPA;hCG_16050;FLJ00064	Cytosolic non-specific dipeptidase;CNDP dipeptidase 2 (Metallopeptidase M20 family), isoform CRA_b;FLJ00064 protein (Fragment)	Q96KP4;B3KUG4;B4DPF1;B4DV28;Q8WY59;Q9NUV1;Q9NW02;Q9H7K8	1.2278	1.1668	1.279
NRM;NRM29;UNQ555/PRO1112;DAAP-285E11.8-007;DADB-118P11.7-007;DAMA-178G23.5-007;DAMC-316D20.7-007;XXbac-BCX48F10.2-007;XXbac-BPG252P9.1-007	Isoform 1 of Nurim;Nurim;Isoform 2 of Nurim	Q8IXM6-1;Q8IXM6;B0S7R0;B3KQU6;B4DP16;A2AB02;Q8IXM6-2;B0S7R1	1.278	1.1706
STAG2;RP11-517O1.1-006;hCG_15646;SA2	stromal antigen 2 isoform a;146 kDa protein;Cohesin subunit SA-2;141 kDa protein	B1AMT5;Q68DE9;Q6AI02;Q6MZM3;Q6MZM4;Q6MZP3;Q8N3U4;B2R8Y6;B4DQ46		1.2239
PITPNA;PITPN	Phosphatidylinositol transfer protein alpha isoform	Q00169;B4E1U1;Q05CD4;Q6NUL6		1.2484	1.1976
NAPA;SNAPA	Alpha-soluble NSF attachment protein	P54920;A8K879	1.2211	1.2286	1.2163
REEP5;C5orf18;DP1;TB2	Receptor expression-enhancing protein 5;21 kDa protein	Q00765;B2R6C4	1.2146	1.1108	1.3373
PSMB7	Proteasome subunit beta type-7	Q99436;B2RAQ9;Q5TBG6;Q6IBT1;Q86U62	1.2854	1.1074	1.2695
DKFZp686G04235;POR;CYPOR	85 kDa protein;Putative uncharacterized protein DKFZp686G04235;NADPH--cytochrome P450 reductase;71 kDa protein;cDNA FLJ59702, highly similar to NADPH--cytochrome P450 reductase;cDNA FLJ59656, highly similar to NADPH--cytochrome P450 reductase	Q63HL4;Q9UDT3;P16435;A8K3B4;B2R6E5;B4DDH3;B4DKM8;Q197M5;Q59ED7;B4DJI8;B4E305	1.1889	1.1938	1.2779
AHSA1;C14orf3;HSPC322	Activator of 90 kDa heat shock protein ATPase homolog 1	O95433;B2R9L2;B4DUR9	1.2984	1.2352	1.1266
UBXD8;ETEA;KIAA0887	FAS-associated factor 2	Q96CS3;B4E2M8	1.2117	1.2816	1.1653
SLC25A6;ANT3;CDABP0051	ADP/ATP translocase 3;17 kDa protein	P12236;Q59EI9;Q6I9V5	1.2935	1.2368	1.1263
TYMP;ECGF1	cDNA, FLJ95575, highly similar to Homo sapiens endothelial cell growth factor 1 (platelet-derived) (ECGF1), mRNA;Thymidine phosphorylase;46 kDa protein	B2RBL3;P19971	1.3161	1.1131	1.2263
GGH	Gamma-glutamyl hydrolase	Q92820;A8K335;B4DVI2	1.2555	1.3807	1.0186
ACTN4	Alpha-actinin-4;cDNA FLJ58087, highly similar to Alpha-actinin-4;Actinin alpha4 isoform	O43707;Q96BG6;B4E337;A4K467	1.2729	1.103	1.2781
TXNDC14;TMX2;CGI-31;My009;PIG26;PSEC0045;UNQ237/PRO270	Isoform 1 of Thioredoxin domain-containing protein 14;Putative uncharacterized protein TXNDC14;Isoform 2 of Thioredoxin domain-containing protein 14	Q9Y320-1;Q9Y320;B2R7I0;B5MD66;Q9Y320-2	1.4427	1.1084	1.1026
NUP188;KIAA0169	Isoform 1 of Nucleoporin NUP188 homolog;Isoform 2 of Nucleoporin NUP188 homolog;NUP188 protein (Fragment)	Q5SRE5-1;Q5SRE5;Q5SRE5-2;Q9BS12		1.3867	1.0484
DCTN1	Putative uncharacterized protein DCTN1;Putative uncharacterized protein DCTN1;Isoform p150 of Dynactin subunit 1;Isoform p135 of Dynactin subunit 1;dynactin 1 isoform 4	A8MY36;A8MWX9;B4DM45;Q14203-1;Q14203;Q6MZZ3;Q14203-2;Q6IQ37;Q6LCB2	1.3522	1.0844	1.2135
NCALD	Neurocalcin-delta;Neurocalcin delta variant (Fragment)	P61601;B2RB70;Q59GU4	1.0865	1.3077	1.2557
PRDX1;PAGA;PAGB;TDPX2	Peroxiredoxin-1;19 kDa protein;11 kDa protein	Q06830;B2R4P2;B5BU26	1.1735	1.2351	1.2407
DPM1;RP5-914P20.2-003;RP5-914P20.2-005;RP5-914P20.2-004	Dolichyl-phosphate mannosyltransferase polypeptide 1, catalytic subunit;Dolichyl-phosphate mannosyltransferase polypeptide 1, catalytic subunit;Dolichol-phosphate mannosyltransferase;Dolichyl-phosphate mannosyltransferase polypeptide 1, catalytic subunit	Q5QPK0;Q5QPK2;O60762;Q6IB78;Q96HK0;Q5QPJ9	1.2186	1.1804	1.2477
GLRX;GRX	Glutaredoxin-1	P35754;B2R4L2	1.1731	1.1519	1.3208
ATP6V1G1;ATP6G;ATP6G1;ATP6J	V-type proton ATPase subunit G 1	O75348;Q6IB33	1.4378	1.1099	1.0962
OCIAD1;OCIA	Isoform 1 of OCIA domain-containing protein 1;OCIA domain containing 1 isoform 2;Isoform 2 of OCIA domain-containing protein 1	Q9NX40-1;Q9NX40;Q9NX40-2;B4DND1	1.2121	1.2661	1.1654
RAB15	Isoform 1 of Ras-related protein Rab-15;Isoform 2 of Ras-related protein Rab-15	P59190-1;P59190;P59190-2;Q6MZX6	1.1544	1.1109	1.3781
TXNRD1;KDRF	Isoform 1 of Thioredoxin reductase 1, cytoplasmic;Isoform 6 of Thioredoxin reductase 1, cytoplasmic;Isoform 3 of Thioredoxin reductase 1, cytoplasmic;Isoform 2 of Thioredoxin reductase 1, cytoplasmic;Isoform 5 of Thioredoxin reductase 1, cytoplasmic;cDNA FLJ46672 fis, clone TRACH3009008, highly similar to Thioredoxin reductase	Q16881-1;Q16881;B2R5P6;Q16881-6;Q16881-3;Q16881-2;Q16881-5;Q16881-4;Q6ZR44	1.2529	1.2673	1.1231
HLA DRB4;HLA-DRB4;HLA-DRB4$0101	major histocompatibility complex, class II, DR beta 4 precursor;HLA class II histocompatibility antigen, DR-W53 beta chain;similar to HLA class II histocompatibility antigen, DR-W53 beta chain	O00664;O19759;O78042;O78117;P79491;Q29869;Q29889;Q30152;Q30163;Q861F3;Q9BD10;Q9UEY1;P13762;Q2LIR4;Q861F4;Q8WLT9;O19668;O19719;O19727;O19738;O19740;O19743;P79664;Q05563;Q6TLK6;Q860N4;Q9GIJ6;Q9GJ49;Q9MYE4;Q9NQ54;Q9UEX8;Q9UEY3;Q9UM28	1.2204	1.2393	1.1833
MTX2;hCG_1778458	Metaxin-2;metaxin 2 isoform b	O75431;B3KM74;Q8IZ68	1.2696	1.1299	1.2421
ARMET;ARP	Protein ARMET	P55145;A8K878	1.2826	1.3603	0.99862
UBE2R2;CDC34B;UBC3B	Ubiquitin-conjugating enzyme E2 R2	Q712K3		1.2138
SCRN1;KIAA0193;hCG_37324	cDNA FLJ59687, highly similar to Secernin-1;cDNA FLJ59539, highly similar to Secernin-1;cDNA FLJ51971, highly similar to Secernin-1;cDNA FLJ54276, highly similar to Secernin-1	Q12765;A8K0E9;B4DHM0;B4DH22;B4DIP5;B4DIV7;B4DE46	1.0837	1.2218	1.3344
PRDX3;AOP1;mer5	Thioredoxin-dependent peroxide reductase, mitochondrial;peroxiredoxin 3 isoform b	P30048;A4UCS5;B2R7Z0;Q53HC2;Q14579	1.2808	1.1642	1.1942
PGD;PGDH	56 kDa protein;6-phosphogluconate dehydrogenase, decarboxylating;cDNA FLJ51182, highly similar to 6-phosphogluconate dehydrogenase, decarboxylating	P52209;A9Z1X1;B4DL86;B4DQJ8;B4DV68;B4E2U0;B4E1L8	1.2087	1.2231	1.2028
RAB10	Ras-related protein Rab-10	P61026;Q53SX4;Q53T70;Q9UL28	1.2016	1.201	1.2261
SDHA;SDH2;SDHF	cDNA FLJ61478, highly similar to Succinate dehydrogenase (ubiquinone) flavoprotein subunit, mitochondrial	P31040;A8K5J6;B3KT34;B4DJ60;B4DYN5;Q0QF12;Q59GW8	1.2159	1.1741	1.2363
BDH2;DHRS6;UNQ6308/PRO20933	Isoform 1 of 3-hydroxybutyrate dehydrogenase type 2;Similar to 3-hydroxybutyrate dehydrogenase type 2;Isoform 2 of 3-hydroxybutyrate dehydrogenase type 2	Q9BUT1-1;Q9BUT1;A8K295;B4DUF6;Q9BUT1-2;A8K5M0;B3KY19		1.1816	1.2358
ACTC1;ACTC;ACTA2;ACTSA;ACTVS;GIG46;ACTG2;ACTA3;ACTL3;ACTSG;ACTA1;ACTA;RP5-1068B5.2-002	Actin, alpha cardiac muscle 1;Actin, aortic smooth muscle;Actin, gamma-enteric smooth muscle;Actin, alpha skeletal muscle;cDNA FLJ39583 fis, clone SKMUS2004897, highly similar to ACTIN, ALPHA SKELETAL MUSCLE;Putative uncharacterized protein ACTA1;Actin alpha 1 skeletal muscle protein	P68032;B3KPP5;B4E315;P62736;A8K3K1;B2R8A4;B4DUI8;Q13707;P63267;B2R7E7;B3KW67;Q562S2;P68133;Q5T8M9;B3KUD3;Q5T8M7;A6NL76;Q5T8M8;Q7Z7J6	1.0504	1.4199	1.1535
TMEM97;MAC30	Transmembrane protein 97	Q5BJF2;B4DDT6;B4DS02	1.4075	1.2146	1.0013
STX4;STX4A;hCG_21149	Syntaxin-4;Syntaxin 4A (Placental), isoform CRA_c;25 kDa protein	Q12846;Q6FHE8;A8MXY0		1.2129	1.2022
C21orf33;HES1;KNPI	Isoform Long of ES1 protein homolog, mitochondrial;Protein;Protein;Isoform Short of ES1 protein homolog, mitochondrial	P30042-1;P30042;P30042-2	1.2285	1.1556	1.2363
UBE2V1;CROC1;UBE2V;UEV1;P/OKcl.19;RP5-1185N5.3-005	TMEM189-UBE2V1 readthrough transcript isoform 1;42 kDa protein;Isoform 1 of Ubiquitin-conjugating enzyme E2 variant 1;Isoform 5 of Ubiquitin-conjugating enzyme E2 variant 1;Isoform 2 of Ubiquitin-conjugating enzyme E2 variant 1;Isoform 3 of Ubiquitin-conjugating enzyme E2 variant 1;Ubiquitin-conjugating enzyme E2 variant 1;Isoform 4 of Ubiquitin-conjugating enzyme E2 variant 1;12 kDa protein	Q13404-1;Q13404;Q13404-7;Q13404-2;Q13404-4;Q5TGE0;Q13404-6;Q5TGE3	1.231	1.1533	1.2333
LAP3;LAPEP;PEPS	Isoform 1 of Cytosol aminopeptidase;Isoform 2 of Cytosol aminopeptidase;cDNA FLJ54122, highly similar to Cytosol aminopeptidase	P28838-1;P28838;P28838-2;B3KMQ3;B4DQG5	1.2625	1.1236	1.2314
SPTLC1;LCB1	Serine palmitoyltransferase 1;SPTLC1 protein	O15269;A8K681;B4DR90;Q59EQ4;Q6NUL7		1.2055
HSPA4;APG2	Heat shock 70 kDa protein 4	P34932;B0AZS1;B0AZT0;B0AZU6;B4DH02;B4DIZ3;B4DN48;B4DSE8;B4DT47;B4DUS3;B4E0H6;B4E354;O14992;Q59GF8;Q7KYN0	1.2569	1.1947	1.1647
CARM1;hCG_29972;PRMT4	coactivator-associated arginine methyltransferase 1;Isoform 1 of Histone-arginine methyltransferase CARM1;Isoform 2 of Histone-arginine methyltransferase CARM1	A6NN38;Q86X55-1;Q86X55;Q86X55-2	1.1716	1.2363	1.2077
ZNF259;ZPR1	Zinc finger protein ZPR1;Protein;Protein	O75312;B4DVT8		1.2046
PRKCB1;PKCB;PRKCB	Isoform Beta-II of Protein kinase C beta type;Isoform Beta-I of Protein kinase C beta type	P05771-2;P05771;P05771-1	1.2013	1.206
	Kv channel interacting protein 3 variant (Fragment)	Q59GN3		1.2036
CD82;KAI1;SAR2;ST6;TSPAN27	CD82 antigen	P27701;Q6LET0;Q7Z2D4	1.2035
FLNA;FLN;FLN1;XX-FW83128A1.1-010	Isoform 1 of Filamin-A;Isoform 2 of Filamin-A;Filamin A, alpha	P21333-1;P21333;Q5HY55;Q60FE5;P21333-2;Q5HY53;Q60FE6;Q6NXF2;Q8TES4;B4E2F9;Q5HY54;Q86TQ3;Q96C61	1.2678	1.0784	1.2641
HSP90AB1;HSP90B;HSPC2;HSPCB;HSP90AB3P;HSP90BC	Heat shock protein HSP 90-beta;Putative heat shock protein HSP 90-beta-3	P08238;A8K3W9;B2R5P0;B4DGL0;B4DMA2;Q6PK50;Q9H6X9;Q58FF7	1.2193	1.2099	1.181
PTGES3;hCG_2016483;P23;TEBP	Prostaglandin E synthase 3 (Cytosolic), isoform CRA_c;19 kDa protein;Prostaglandin E synthase 3;cDNA FLJ59942, highly similar to Prostaglandin E synthase 3;cDNA FLJ50819, highly similar to Prostaglandin E synthase 3;cDNA FLJ59888, moderately similar to Prostaglandin E synthase 3;cDNA FLJ59832, moderately similar to Prostaglandin E synthase 3	B3KUY2;Q15185;A8K7D0;B4DP11;B4DP21;B4DHP2;B4DDC6	1.3327	1.1149	1.1618
SUPT6H;KIAA0162;SPT6H	Isoform 1 of Transcription elongation factor SPT6	Q7KZ85-1;Q7KZ85;A7E2B4	1.2165	1.1179	1.2747
PRPF4B;KIAA0536;PRP4;PRP4H;PRP4K	Serine/threonine-protein kinase PRP4 homolog;43 kDa protein	Q13523;B4DZQ5		1.2025
HLA-B;HLAB	HLA class I histocompatibility antigen, B-18 alpha chain;MHC class I antigen	P30466;A0MVW9;A1DZU1;A1IVL5;A1KQY2;A1YWK4;A1Z289;A1Z3E0;A2TEM8;A3F718;A3FFS6;A3FG59;A3RLM7;A4FRG1;A4Q971;A5HDH5;A5PHT2;A5PHT8;A5Z1V7;A7U8S4;A7U966;A8VYR7;A8VYR9;A8VYS0;A8YQI6;A9XFY2;A9YQA1;B0BK82;B0BK84;B0LUY6;B1GYE9;B1PN79;B2RG98;B2YG93;B5LZ22;B5LZ24;B5U8C8;O02861;O19510;O19511;O19524;O19526;O19528;O19530;O19532;O19534;O19536;O19538;O19540;O19542;O19544;O19548;O19567;O19581;O19582;O19584;O19589;…	1.3088	1.1585	1.1387
RCL;C6orf108	c-Myc-responsive protein Rcl;putative c-Myc-responsive isoform 2	O43598;B2LUJ9;A8MXA0	1.214	1.1553	1.2335
SDHB;SDH;SDH1	Succinate dehydrogenase [ubiquinone] iron-sulfur subunit, mitochondrial	P21912;B2R545;Q0QEY7;Q70SX8	1.2674	1.0986	1.2368
TPR	Nucleoprotein TPR	P12270;A0PJC9;Q15624;Q504U6;Q58F23;Q99968;Q9UE33	1.2971	1.0679	1.2377
GNB1;RP1-283E3.7-004;RP1-283E3.7-007;RP1-283E3.7-006	Guanine nucleotide-binding protein G(I)/G(S)/G(T) subunit beta-1;cDNA FLJ16663 fis, clone THYMU2005759, highly similar to Guanine nucleotide-binding proteinG(I)/G(S)/G(T) subunit beta 1;Guanine nucleotide binding protein (G protein), beta polypeptide 1;Guanine nucleotide binding protein (G protein), beta polypeptide 1	P62873;B2R6K4;Q1RMY8;B3KVK2;Q5QPT1;Q71UM6;Q71UM7;B1AKQ9;B1AKQ8	1.3296	1.0426	1.2297
GPX4	glutathione peroxidase 4 isoform C precursor;Isoform Mitochondrial of Phospholipid hydroperoxide glutathione peroxidase, mitochondrial;Isoform Cytoplasmic of Phospholipid hydroperoxide glutathione peroxidase, mitochondrial;glutathione peroxidase 4 isoform B precursor	P36969-1;P36969;Q6PI42;P36969-2;Q6PJX4	1.1189	1.2643	1.2173
	57 kDa protein		1.2757	1.1776	1.1445
STK3;MST2	cDNA FLJ16404 fis, clone UTERU2008019, highly similar to Serine/threonine-protein kinase 3	Q13188;A8K722;B3KYA7		1.1988
TIMM50;TIM50;PRO1512	Isoform 2 of Mitochondrial import inner membrane translocase subunit TIM50;Isoform 1 of Mitochondrial import inner membrane translocase subunit TIM50	Q3ZCQ8-2;Q3ZCQ8;Q0VAB1;Q330K1;Q3ZCQ8-1	1.2702	1.1577	1.1682
PMPCA;INPP5E;KIAA0123;MPPA	Mitochondrial-processing peptidase subunit alpha	Q10713;B4DKL3;Q5SXM9;Q9BT52	1.2744	1.1382	1.1825
LACTB;MRPL56;UNQ843/PRO1781	Isoform 1 of Serine beta-lactamase-like protein LACTB, mitochondrial	P83111-1;P83111		1.1981
PLS1	Plastin-1;PLS1 protein	Q14651;A8K2Q1;Q8NEG6		1.1502	1.2454
PEF1;ABP32;UNQ1845/PRO3573	Peflin	Q9UBV8	1.3404	1.152	1.1
PTPRC;RP11-553K8.4-001;hCG_1811178;CD45;RP11-553K8.4-006;RP11-553K8.4-002;RP11-553K8.4-003;RP11-553K8.4-010	Protein tyrosine phosphatase, receptor type, C;Isoform 1 of Leukocyte common antigen;protein tyrosine phosphatase, receptor type, C isoform 3 precursor;Protein tyrosine phosphatase, receptor type, C;Isoform 2 of Leukocyte common antigen;cDNA FLJ61519, highly similar to Leukocyte common antigen;Protein tyrosine phosphatase, receptor type, C	B1ALS2;P08575-1;P08575;B4DSZ5;Q5T9M4;Q6PJK7;Q6QIQ5;B1ALS3;P08575-2;A8K7W6;Q5T9M0;Q6QIN1;Q6QIN9;B4E0V3;Q5T9M5;Q6Q1P2;Q6QIR3;Q8TD79;Q9H3X6;B1ALS1;Q6QIM3	1.3126	0.99026	1.2884
PSMD2;TRAP2	26S proteasome non-ATPase regulatory subunit 2	Q13200;B4DM22;B4DX07;B4DXY1;Q53XQ4;Q59EG8;Q9NSM5	1.2566	1.1982	1.1312
C3orf60;hCG_96422;DKFZp564J0123	Uncharacterized protein C3orf60;chromosome 3 open reading frame 60 isoform b;Putative uncharacterized protein DKFZp564J0123	Q9BU61;A4FU71;Q9Y3Z0	1.2598	1.1306
LGALS1	Galectin-1	P09382;B2R5E8;Q15954	1.1622	1.158	1.2638
PEPD;PRD	Xaa-Pro dipeptidase;Putative uncharacterized protein PEPD (Fragment);cDNA FLJ58179, highly similar to Xaa-Pro dipeptidase;cDNA FLJ57945, highly similar to Xaa-Pro dipeptidase	P12955;A8K3Z1;A8K416;A8K696;A8MX47;B4DGJ1;B4DDB7	1.2135	1.1756
UBE2L6;UBCH8;hCG_39758	ubiquitin-conjugating enzyme E2L 6 isoform 1;18 kDa protein;ubiquitin-conjugating enzyme E2L 6 isoform 2	O14933;Q8N5D8;A6NDM6	1.2791	1.0402	1.2637
GABARAP;FLC3B;HT004;GABARAPL1;GEC1	Gamma-aminobutyric acid receptor-associated protein;cDNA FLJ59143, highly similar to Gamma-aminobutyric acid receptor-associated protein-like 1;Gamma-aminobutyric acid receptor-associated protein-like 1	O95166;B2R5J1;Q6IAW1;B4E0Y7;Q9H0R8;B2RD60		1.1936
NDUFB10;hCG_42700	NADH dehydrogenase [ubiquinone] 1 beta subcomplex subunit 10;NDUFB10 protein	O96000;A8K761;Q96II6;Q96RX5	1.2152	1.2111	1.154
NUP153	cDNA FLJ60565, highly similar to Nuclear pore complex protein Nup153;Nuclear pore complex protein Nup153	B4DIK2;P49790;Q4LE47;Q7Z743		1.1932
PSMB6;LMPY	Proteasome subunit beta type-6;20 kDa protein;12 kDa protein	P28072;Q6IAT9	1.1437	1.19	1.2421
COTL1;CLP	Coactosin-like protein	Q14019;B2RDU3	1.229	1.1114	1.2343
PARP4;ADPRTL1;KIAA0177;PARPL	Poly [ADP-ribose] polymerase 4	Q9UKK3;A0PJ82;B4E2S2;Q5QNZ9		1.19
TIMM9;TIM9;TIM9A;TIMM9A	Mitochondrial import inner membrane translocase subunit Tim9	Q9Y5J7;B2R584		1.19
PSMB9;DAAP-27A1.3-001;DAMC-226H3.3-001;DASS-67H14.4-001;LMP2;RING12;DAAP-27A1.3-005;DAMC-226H3.3-005;DASS-67H14.4-005;DADB-223G19.3-006;DAMA-91I23.6-006;DAQB-69D7.7-006;XXbac-BCX32M13.7-006;XXbac-BPG246D15.7-006;DAAP-27A1.3-006;DAMC-226H3.3-006;DASS-67H14.4-006	Proteasome subunit beta type;Isoform LMP2.L of Proteasome subunit beta type-9;Isoform LMP2.S of Proteasome subunit beta type-9;Proteasome subunit beta type;Proteasome (Prosome, macropain) subunit, beta type, 9;Proteasome (Prosome, macropain) subunit, beta type, 9	B0V0T1;P28065-1;P28065;Q5JNW4;P28065-2;A2ACR1;B0V0T3;A2ACR0;B0V0T2	1.1675	1.1161	1.2856
GOLGA2	Golgi autoantigen, golgin subfamily a, 2;cDNA FLJ26129 fis, clone TMS02971	Q08379-1;Q08379;Q6ZPB4		1.1894
STOM;BND7;EPB72;RP11-342H3.1-002	Erythrocyte band 7 integral membrane protein;cDNA FLJ53133, highly similar to Erythrocyte band 7 integral membrane protein;stomatin isoform b	P27105;B4DZK8;B4E2V5;B4E310;B1AM77	1.1892
NAMPT;PBEF;PBEF1;RP11-92J19.4;RP11-92J19.4-001	Isoform 1 of Nicotinamide phosphoribosyltransferase;Novel protein similar to Pre-B cell enhancing factor;Isoform 2 of Nicotinamide phosphoribosyltransferase	P43490-1;P43490;A4D0Q9;Q658Z1;Q5SYT8;P43490-2;A4D0R0	1.2423	1.1088	1.2132
NPEPPS;PSA	Puromycin-sensitive aminopeptidase;cDNA FLJ38558 fis, clone HCHON2003327, highly similar to Puromycin-sensitive aminopeptidase	P55786;B3KU93;B3KTP2;B4DGH6	1.2255	1.1787	1.1585
FDFT1	Squalene synthetase;cDNA FLJ55760, highly similar to Squalene synthetase;cDNA FLJ50548, highly similar to Squalene synthetase;21 kDa protein	P37268;B3KQ95;B4DT56;B4DTK0;Q6IAX1;B4DND3;B4DJE5	1.278	1.2741	1.0047
RAB9A;RAB9	Ras-related protein Rab-9A	P51151;A8K390	1.1612	1.1806	1.2125
ST13;FAM10A1;HIP;SNC6;FAM10A5;FAM10A4;RP3-408N23.5-003	Hsc70-interacting protein;Protein;Protein FAM10A5;Protein FAM10A4;Suppression of tumorigenicity 13	P50502;B4E0U6;Q0IJ56;Q1XBU6;Q2TU77;Q3KNR6;Q8NFI4;Q8IZP2;B1AHN5	1.2286	1.1319	1.1928
HIGD1A;HIG1;HSPC010;HIGD1C;UBIE;UBIE2	HIG1 domain family, member 1A isoform a;HIG1 domain family member 1A;similar to HIG1 domain family, member 1A;HIG1 domain family member 1C;similar to HIG1 domain family, member 1A;4 kDa protein	B2R4G1;Q9Y241;A8MV81		1.1842
ACAT1;ACAT;MAT	Acetyl-CoA acetyltransferase, mitochondrial;ACAT1 protein	P24752;B2R6H1;Q6P3T4	1.3157	1.1315	1.1035
PDXK;C21orf124;C21orf97;PKH;PNK	Isoform 1 of Pyridoxal kinase;Isoform 3 of Pyridoxal kinase;Putative uncharacterized protein PDXK;Isoform 2 of Pyridoxal kinase	O00764-1;O00764;O00764-3;A8MU63;O00764-2	1.1934	1.1253	1.2311
MDH2	Malate dehydrogenase, mitochondrial	P40926;B2RE78;B3KTM1;B4DE44;Q0QF37;Q6FHZ0;Q75MP7;Q75MT9	1.3034	1.137	1.1087
GOT2	Aspartate aminotransferase, mitochondrial;cDNA FLJ55692, highly similar to Aspartate aminotransferase, mitochondrial	P00505;A8K482;B3KUZ8;B4DJA6	1.2592	1.1571	1.1323
ITGA4;CD49D	Integrin alpha-4 precursor;115 kDa protein	P13612;B4E045;B4E0Q2;Q13682;Q59H74;Q68EM9;Q6PJE7;Q8IU66;Q8IU71;Q8IUA2		1.1828
HINT1;HINT;PKCI1;PRKCNH1	Histidine triad nucleotide-binding protein 1	P49773	1.235	1.0874	1.2255
NDUFB9;LYRM3;UQOR22	NADH dehydrogenase [ubiquinone] 1 beta subcomplex subunit 9;NADH-ubiquinone oxidoreductase B22 subunit;27 kDa protein	Q9Y6M9;B2R8M6;Q5JVG7;Q9UQS5		1.1954	1.1695
	similar to actin alpha 1 skeletal muscle protein				1.1822
FLJ00382;IGHD	FLJ00382 protein (Fragment);Isoform 2 of Ig delta chain C region;Isoform 1 of Ig delta chain C region	Q8NF20;P01880-2;P01880;P01880-1	1.1817
TUBA3C;TUBA2;TUBA3D	Isoform 2 of Tubulin alpha-3C/D chain;Tubulin alpha-2 chain (Alpha-tubulin 2). Isoform 2	Q13748-2;Q13748	1.1467	1.2146
BPNT1	Isoform 1 of 3'(2'),5'-bisphosphate nucleotidase 1;cDNA FLJ52417, highly similar to 3'(2'),5'-bisphosphate nucleotidase 1;Isoform 2 of 3'(2'),5'-bisphosphate nucleotidase 1;3'(2'),5'-bisphosphate nucleotidase 1 (EC 3.1.3.7) (Bisphosphate 3'- nucleotidase 1) (PAP-inositol-1,4-phosphatase) (PIP). Isoform 2	O95861-1;O95861;A8K7C8;B4DPS5;B4DUS9;O95861-2;A6NF51	1.2506	1.0951	1.1962
DFNA5;ICERE1	Isoform Long of Non-syndromic hearing impairment protein 5;deafness, autosomal dominant 5 protein isoform b	O60443-1;O60443;A4D156;A4FTY0;A4FVA8;A8K410;B2RAX9;O60443-2;B3KT05	1.4449	1.0761	1.0209
CPNE3;CPN3;KIAA0636	Copine-3	O75131;A8KA47;Q05DL8	1.2578	1.1094	1.1724
GSS	Glutathione synthetase	P48637;B2R697;Q8TDA8	1.1793
MAPK3;ERK1;PRKM3;hCG_1983753	Mitogen-activated protein kinase 3;mitogen-activated protein kinase 3 isoform 2;mitogen-activated protein kinase 3 isoform 3;Putative uncharacterized protein	P27361;B0LPG3;B3KR49;Q7Z3H5;Q8NHX1;A8CZ58;Q8NHX0;Q9BWJ1	1.1791
H3F3A;H3.3A;H3F3;PP781;H3F3B;H3.3B	Histone H3.3	P84243;A8K4Y7;B2R4P9;B2R6Y1			1.1776
SNAP29	Synaptosomal-associated protein 29;18 kDa protein	O95721		1.1773
HADHA;HADH	Trifunctional enzyme subunit alpha, mitochondrial	P40939;B2R7L4;B4DDZ5;B4DRH6;Q53T69;Q53TA2;Q9UQC5	1.1789	1.2211	1.1316
RRAGB;RRAGA;RP11-465E19.1-005	Isoform 2 of Ras-related GTP-binding protein B;Ras-related GTP-binding protein A;Ras-related GTP binding B	Q5VZM2-2;Q5VZM2;A8K042;Q7L523;B2R7L1;Q5VZM0		1.106	1.2473
CUL5;VACM1	Cullin-5;Putative uncharacterized protein CUL5 (Fragment)	Q93034;A8K960;A8MTD9		1.1762
TRAP1;HSP75	Heat shock protein 75 kDa, mitochondrial;57 kDa protein	Q12931;B4DR68;Q53FS6;Q53G55;Q59EK6;Q5CAQ4;Q8N9Z3;Q9BV61	1.2109	1.1663	1.1495
SGTA;SGT	Small glutamine-rich tetratricopeptide repeat-containing protein alpha;cDNA FLJ56566, highly similar to Small glutamine-rich tetratricopeptiderepeat-containing protein A	O43765;Q6FIA9;B4DEA6	1.1868	1.1871	1.1524
EIF2B3;RP5-882O7.2-008	Isoform 1 of Translation initiation factor eIF-2B subunit gamma;Isoform 2 of Translation initiation factor eIF-2B subunit gamma;Isoform 3 of Translation initiation factor eIF-2B subunit gamma;Eukaryotic translation initiation factor 2B, subunit 3 gamma, 58kDa;Putative uncharacterized protein EIF2B3	Q9NR50-1;Q9NR50;B2RBH8;Q9HA31;Q9NR50-2;Q9NR50-3;Q5QP91;A8MYS7	1.4428	0.90751
CYB5A;CYB5	Isoform 1 of Cytochrome b5;Putative uncharacterized protein CYB5A;Isoform 2 of Cytochrome b5;14 kDa protein	P00167-1;P00167;Q6IB14;A8MV91;P00167-2;Q59F44	1.2079	1.1243	1.19
ALDH2;ALDM	Aldehyde dehydrogenase, mitochondrial;cDNA FLJ50888, highly similar to Aldehyde dehydrogenase, mitochondrial	P05091;B4YAH7;Q53FB6;B0LUF9;B0LUG0;B0LUG2;B4DW54;Q9UN17		1.1737
NRD1;RP4-657D16.2-002;hCG_40292	nardilysin (N-arginine dibasic convertase) isoform a;Isoform 2 of Nardilysin;nardilysin (N-arginine dibasic convertase) isoform b	B1AKJ5;Q6UUU9;O43847-2;O43847;O43847-1;A6NI41;B4DRI0;B4DYV0;Q96L67	1.3142	1.1404	1.0661
SART3;KIAA0156;TIP110	Isoform 1 of Squamous cell carcinoma antigen recognized by T-cells 3;cDNA FLJ51777, highly similar to Squamous cell carcinoma antigen recognized byT-cells 3	Q15020-1;Q15020;A8K2E4;B4DRG9;B4DYA2;B4E3R6	1.1836	1.1536	1.1797
XPO4;KIAA1721	Exportin-4	Q9C0E2;Q0VG75;Q86VC1;Q8IVQ8	1.0532	1.1853	1.2775
DBI	Isoform 2 of Acyl-CoA-binding protein;diazepam binding inhibitor isoform 2;Isoform a 1 of Acyl-CoA-binding protein	P07108-2;P07108;Q4VWZ6;P07108-1;Q9UCI8	1.2759	1.0979	1.1379
HADH;HAD;HADHSC;SCHAD	Isoform 2 of Hydroxyacyl-coenzyme A dehydrogenase, mitochondrial;Isoform 1 of Hydroxyacyl-coenzyme A dehydrogenase, mitochondrial;cDNA FLJ38699 fis, clone KIDNE2002168, highly similar to Short chain 3-hydroxyacyl-CoA dehydrogenase, mitochondrial	Q16836-2;Q16836;Q16836-1;B2RB06;Q4W5B4;B3KTT6	1.2406	1.1322	1.1382
CAND1;KIAA0829;TIP120;TIP120A	Isoform 1 of Cullin-associated NEDD8-dissociated protein 1;Similar to Cullin-associated NEDD8-dissociated protein 1;Isoform 2 of Cullin-associated NEDD8-dissociated protein 1	Q86VP6-1;Q86VP6;A8K8U1;B2RAU3;B3KM30;B3KMG3;Q86VP6-3;Q86VP6-2	1.1975	1.1973	1.1128
UBE2N;BLU;UBE2NL	Ubiquitin-conjugating enzyme E2 N;Ubiquitin carrier protein (Fragment);11 kDa protein;Putative ubiquitin-conjugating enzyme E2 N-like	P61088;A8MUJ2;Q5JXB2	1.16	1.1206	1.2259
IMMT;HMP;PIG4	Isoform 2 of Mitochondrial inner membrane protein;Isoform 1 of Mitochondrial inner membrane protein	Q16891-2;Q16891;B4DKR1;B4DS66;Q16891-1;B1H0U5;B2R5N6	1.2132	1.124	1.1692
DLAT;DLTA	Dihydrolipoyllysine-residue acetyltransferase component of pyruvate dehydrogenase complex, mitochondrial;cDNA FLJ57320, highly similar to Dihydrolipoyllysine-residue acetyltransferase component of pyruvate dehydrogenase complex, mitochondrial	P10515;B4DJX1;B4DS43;Q16791;Q86YI5;B4DLQ2;Q01991;Q9HAN0	1.1681	1.195	1.1427
TOMM70A;KIAA0719	Mitochondrial import receptor subunit TOM70	O94826;B3KQK5;B4DZ87;Q6P0M2	1.1871	1.271	1.0474
PLEK;P47	Pleckstrin;PLEK protein variant (Fragment)	P08567;B2R9E8;Q6FGQ1;Q59GZ2	1.1026	1.2589	1.1435
ATP6V1A;ATP6A1;ATP6V1A1;VPP2	V-type proton ATPase catalytic subunit A	P38606;B2RBR8	1.1721	1.1404	1.1908
LCP1;PLS2	Plastin-2	P13796;B2R613;B3KUI1;Q53FI1;Q59GX5;Q5TBN4	1.1256	1.2085	1.1684
ASMTL	Isoform 1 of N-acetylserotonin O-methyltransferase-like protein;Isoform 2 of N-acetylserotonin O-methyltransferase-like protein;cDNA FLJ59356, highly similar to N-acetylserotonin O-methyltransferase-like protein;similar to acetylserotonin O-methyltransferase-like	O95671-1;O95671;B3KM43;B4DRF1;B4DX75;O95671-2;B4DN81	1.0923	1.2425
CMPK1;CMK;CMPK;UCK;UMK;UMPK;RP11-511I2.1-004;RP11-511I2.1-003	cytidine monophosphate (UMP-CMP) kinase 1, cytosolic isoform a;cDNA FLJ53966, moderately similar to Homo sapiens cytidylate kinase (CMPK), mRNA;cytidine monophosphate (UMP-CMP) kinase 1, cytosolic isoform b;cDNA FLJ52483, highly similar to Homo sapiens cytidylate kinase (CMPK), mRNA;Cytidine monophosphate (UMP-CMP) kinase 1, cytosolic	P30085;B2R6S5;B4DDL4;B4DPU7;B4DFW6;Q5T0D2;Q5T0D3	1.1535	1.1478	1.2003
CAPG;AFCP;MCP	Macrophage-capping protein;gelsolin-like capping protein;cDNA FLJ51488, highly similar to Macrophage capping protein	P40121;B2R9S4;B4DU58			1.1672
MSN	Moesin;Putative uncharacterized protein MSN (Fragment)	P26038;Q6PJT4;A8MZ70	1.1329	1.2084	1.1582
ANXA5;ANX5;ENX2;PP4	Annexin A5;Putative uncharacterized protein ANXA5 (Fragment)	P08758;B4DNG6;Q6FHB3;A8MTE3	1.0991	1.1614	1.235
AKR1B1;ALDR1	Aldose reductase;Aldo-keto reductase family 1, member B1 variant (Fragment)	P15121;B2R8N3;O15289;Q6FGA4;Q6ICP2;Q59EL5	1.1954	1.0958	1.2041
MCCC1;MCCA;DKFZp686B20267	Methylcrotonoyl-CoA carboxylase subunit alpha, mitochondrial;Putative uncharacterized protein DKFZp686B20267;48 kDa protein	Q96RQ3;B4DH16;Q68D27	1.1943	1.1922	1.1068
INTS5;KIAA1698	Integrator complex subunit 5	Q6P9B9		1.1644
CTSZ	Cathepsin Z;CTSZ protein (Fragment)	Q9UBR2;B2RC40;Q5U000;Q6PJ02	1.2811	1.098	1.1118
ACTR1A;CTRN1	Alpha-centractin;cDNA FLJ55002, highly similar to Alpha-centractin	P61163;B2R6B0;B4DMT4;B4DXP9;B4DM97	1.2309	1.1652	1.0946
CD70;CD27L;CD27LG;TNFSF7	CD70 antigen;cDNA FLJ60770, highly similar to Tumor necrosis factor ligand superfamilymember 7	P32970;Q53XX4;B4DPR8	1.573	0.81344	1.1026
HSDL2	Isoform 1 of Hydroxysteroid dehydrogenase-like protein 2;Isoform 2 of Hydroxysteroid dehydrogenase-like protein 2	Q6YN16-1;Q6YN16;B4E136;B5MD98;Q6YN16-2;B2R923;B4DWC7		1.4199	0.90438
CCDC47;GK001;MSTP041;PSEC0077	Isoform 1 of Coiled-coil domain-containing protein 47;Isoform 2 of Coiled-coil domain-containing protein 47	Q96A33-1;Q96A33;B2RAS8;Q96A33-2	1.2266	1.1616	1.0982
COX4NB;C16orf4;COX4AL;FAM158B;NOC4	Neighbor of COX4	O43402;Q53Y03		1.1204	1.2036
MDH1;MDHA	Malate dehydrogenase, cytoplasmic	P40925;B2R5V5;B4DUN2	1.2124	1.0949	1.1782
POLR2D	DNA-directed RNA polymerase II subunit RPB4	O15514;Q53T47;Q587J0	1.1566	1.1899	1.1364
PCBD1;DCOH;PCBD	Pterin-4-alpha-carbinolamine dehydratase	P61457;Q6FGB3;Q6LEE0;Q6LEE1;Q6LEE2			1.1595
USP7;HAUSP	Ubiquitin carboxyl-terminal hydrolase 7;Ubiquitin carboxyl-terminal hydrolase	Q93009;Q6U8A4	1.1778	1.1299	1.1702
UBA1;A1S9T;UBE1	Ubiquitin-like modifier-activating enzyme 1;cDNA FLJ53392, highly similar to Ubiquitin-activating enzyme E1	P22314;B4DDE4;B4DL67	1.152	1.1654	1.1576
HSPA8;HSC70;HSP73;HSPA10	Isoform 1 of Heat shock cognate 71 kDa protein;Isoform 2 of Heat shock cognate 71 kDa protein	P11142-1;P11142;A8K7Q2;B3KTV0;B4E1Q1;Q53GZ6;Q96BE0;Q96H53;Q96IS6;Q9NWW3;Q9NZ87;P11142-2;Q53HF2	1.1539	1.2044	1.1139
MALT1;MLT	Isoform 1 of Mucosa-associated lymphoid tissue lymphoma translocation protein 1;Isoform 2 of Mucosa-associated lymphoid tissue lymphoma translocation protein 1	Q9UDY8-1;Q9UDY8;A8K5S1;Q9UDY8-2	1.1576	1.1658	1.1481
RABL4;RAYL;LL22NC01-132D12.2-002;LL22NC01-132D12.2-005	Isoform 1 of Putative GTP-binding protein RAY-like;Isoform 2 of Putative GTP-binding protein RAY-like;Putative uncharacterized protein RABL4 (Fragment);RAB, member of RAS oncogene family-like 4;RAB, member of RAS oncogene family-like 4	Q9BW83-1;Q9BW83;Q9BW83-2;A6NMI4;B1AH57;B1AH58		1.1553
PSMA3;PSC8	Isoform 1 of Proteasome subunit alpha type-3;Isoform 2 of Proteasome subunit alpha type-3	P25788-1;P25788;B2RCK6;Q6IB71;P25788-2	1.1292	1.193	1.143
RETSAT;UNQ439/PRO872	Isoform 1 of All-trans-retinol 13,14-reductase;cDNA FLJ54014, highly similar to All-trans-retinol 13,14-reductase;Isoform 2 of All-trans-retinol 13,14-reductase	Q6NUM9-1;Q6NUM9;B4DKE1;Q6NUM9-2		1.1546
NSFL1C;RP4-776F14.2-005	Isoform 3 of NSFL1 cofactor p47;Isoform 1 of NSFL1 cofactor p47;Isoform 2 of NSFL1 cofactor p47;p47 protein isoform c	Q9UNZ2-5;Q9UNZ2;A6ND98;Q53FF5;Q5JXA5;Q9UNZ2-1;B2RD74;Q53FE8;Q9UNZ2-4;Q5JXA4;A2A2L1	1.2046	1.1977	1.0604
FAHD1;AC012180.10-003;C16orf36;YISKL	Fumarylacetoacetate hydrolase domain containing 1;Isoform 2 of Fumarylacetoacetate hydrolase domain-containing protein 1;Isoform 1 of Fumarylacetoacetate hydrolase domain-containing protein 1	B1AK40;Q6P587-2;Q6P587;B1AK41;Q6P587-1		1.1539
DCAKD	Isoform 1 of Dephospho-CoA kinase domain-containing protein	Q8WVC6-1;Q8WVC6	1.2588	1.0489
M6PRBP1;TIP47	Isoform B of Mannose-6-phosphate receptor-binding protein 1;Isoform A of Mannose-6-phosphate receptor-binding protein 1	O60664-1;O60664;A8K4Y9;O60664-2	1.1483	1.1286	1.1823
SLC25A19;DNC;MUP1	Mitochondrial deoxynucleotide carrier;Solute carrier family 25 member 19;24 kDa protein	Q9HC21;Q5JPC1;Q8NBT6;Q6V9R7		1.2508	1.0547
PSME1;IFI5111	Proteasome activator complex subunit 1;proteasome activator subunit 1 isoform 2	Q06323;Q6FHU3;Q6IBM2;A6NJG9;Q86SZ9	1.1046	1.1722	1.1782
IFI35;IFP35	Isoform 2 of Interferon-induced 35 kDa protein;Isoform 1 of Interferon-induced 35 kDa protein	P80217-2;P80217;P80217-1	1.2284	1.1646	1.0616
SYNE1;KIAA0796;KIAA1262;KIAA1756;MYNE1;RP1-130E4.2-003	1011 kDa protein;Isoform 1 of Nesprin-1;Isoform 4 of Nesprin-1;Isoform 7 of Nesprin-1;Spectrin-like protein of the nuclear envelope and Golgi;Spectrin repeat containing, nuclear envelope 1	Q8NF91-1;Q8NF91;Q8NF91-4;A7E2D5;Q5JV23;Q8NF91-7;Q8NF91-2;B3KV58;B4E3R1;Q5BKU8;Q7RTM4;Q7Z3K4;Q5JT52	1.0536	1.2477
NEK9;KIAA1995;NEK8;NERCC	Serine/threonine-protein kinase Nek9	Q8TD19;B3KY50;Q6PKF2	1.172	1.1463	1.1317
AIFM1;AIF;PDCD8	Isoform 1 of Apoptosis-inducing factor 1, mitochondrial;Isoform 3 of Apoptosis-inducing factor 1, mitochondrial;Isoform 2 of Apoptosis-inducing factor 1, mitochondrial	O95831-1;O95831;A4QPB4;O95831-3;B2RB08;Q5RZ99;Q5RZA0;O95831-2;B1ALN1	1.1822	1.1447	1.1227
ATAD1;FNP001	ATPase family AAA domain-containing protein 1;cDNA FLJ54240, highly similar to ATPase family AAA domain-containing protein 1	Q8NBU5;Q6DKG1;B4E2J1			1.1497
TES	Isoform 1 of Testin;48 kDa protein;Isoform 2 of Testin	Q9UGI8-1;Q9UGI8;A4D0U5;B2RDR4;Q53GU1;Q9UGI8-2;A4D0U6;Q9Y423	1.0579	1.2412
PIP4K2A;PIP5K2;PIP5K2A;PIP4K2B;PIP5K2B;RP11-301N24.1-002	Phosphatidylinositol-5-phosphate 4-kinase type-2 alpha;Isoform 1 of Phosphatidylinositol-5-phosphate 4-kinase type-2 beta;cDNA FLJ51838, highly similar to Phosphatidylinositol-4-phosphate 5-kinase type-2 alpha;Phosphatidylinositol-4-phosphate 5-kinase, type II, alpha	P48426;B0YJ66;B4DGX2;P78356-1;P78356;B4DH09;Q5JUT3		1.1133	1.1856
IARS;hCG_31137	Isoleucyl-tRNA synthetase, cytoplasmic;isoleucyl-tRNA synthetase;IARS protein	P41252;B4DVX2;Q59G75;Q5TCC4;Q7Z3T4;A8KAE9;Q7L4K8;Q7Z355;Q7Z3U5;Q9P1N9;Q6P0M4	1.1464	1.1456	1.1559
GCSH	Glycine cleavage system H protein, mitochondrial;similar to Glycine cleavage system H protein, mitochondrial	P23434;Q53XL7;Q6IAT2;Q6QN92	1.2144	1.0829
MACF1;ABP620;ACF7;KIAA0465;KIAA1251	Isoform 2 of Microtubule-actin cross-linking factor 1, isoforms 1/2/3/5;620 kDa protein;Isoform 1 of Microtubule-actin cross-linking factor 1, isoforms 1/2/3/5;614 kDa protein;Isoform 5 of Microtubule-actin cross-linking factor 1, isoforms 1/2/3/5	Q9UPN3-2;Q9UPN3;Q9UPN3-1;Q9UPN3-4;B1ALC4;B1ANR3;B1AP66	1.1032	1.194
ATP6V1E1;ATP6E;ATP6E2	V-type proton ATPase subunit E 1;vacuolar H+ ATPase E1 isoform b;24 kDa protein;vacuolar H+ ATPase E1 isoform c	P36543;Q53Y06;A8MUE4;A8MUN4	1.1939	1.1384	1.1133
AK3L1;AK3;AK4;AK3L2	Adenylate kinase isoenzyme 4, mitochondrial;similar to hCG38824;similar to hCG38824	P27144;B2R927	0.93996	1.2257	1.2785
PSMD14;POH1	26S proteasome non-ATPase regulatory subunit 14	O00487;B3KNW2;Q4ZG77;Q53TH1;Q59G89;Q96DE8	1.1643	1.1654	1.1113
S100A11;MLN70;S100C	Protein S100-A11;hypothetical LOC729659	P31949;B2R5H0	1.0391	1.2544
ETFA	Electron transfer flavoprotein subunit alpha, mitochondrial;electron transfer flavoprotein, alpha polypeptide isoform b;24 kDa protein	P13804;Q53XN3;B4DT43	1.0905	1.1822	1.1644
CA2	Carbonic anhydrase 2	P00918;B2R7G8;Q6LD99			1.1455
PUS1;PP8985	Isoform 1 of tRNA pseudouridine synthase A;Isoform 2 of tRNA pseudouridine synthase A;42 kDa protein	Q9Y606-1;Q9Y606;B3KQC1;Q9Y606-2;A8K877	1.1454
CAP1;RP11-115D7.1-016	cDNA FLJ53068, highly similar to Adenylyl cyclase-associated protein 1	B4DNA3;B4DUZ8;Q5T0R8	1.1628	1.0373	1.236
FAM129A;C1orf24;GIG39	Protein Niban;Putative uncharacterized protein FAM129A (Fragment)	Q9BZQ8;A8MYQ4	1.1109	1.1795
FRYL;AF4P12;KIAA0826	Isoform 2 of Protein furry homolog-like;Isoform 1 of Protein furry homolog-like	O94915-2;O94915;A1L0R6;B3KY15;Q6AI58;Q6ZR29;O94915-1;B3KXG5	1.0148	1.275
SH3BGRL	SH3 domain-binding glutamic acid-rich-like protein;13 kDa protein	O75368;B0AZV6	1.1951	1.1019	1.1366
	Isoform 1 of Galectin-9B;Galectin-9C;Isoform 2 of Galectin-9B;37 kDa protein;24 kDa protein	Q3B8N2-1;Q3B8N2;B4DKP4;Q6DKI2;Q3B8N2-2	1.2568	1.2116	0.96469
STIP1	cDNA FLJ76863, highly similar to Homo sapiens stress-induced-phosphoprotein 1 (Hsp70/Hsp90-organizing protein) (STIP1), mRNA;Stress-induced-phosphoprotein 1;STIP1 protein;cDNA FLJ54451, highly similar to Stress-induced-phosphoprotein 1	A8K690;P31948;Q3ZCU9;B4DM70	1.1579	1.1092	1.1658
GMPR2;hCG_40198	GMPR2 protein;guanosine monophosphate reductase 2 isoform 1;GMP reductase 2;38 kDa protein;Guanosine monophosphate reductase 2, isoform CRA_d	Q6PKC0;Q9P2T1;Q7Z527;Q86SZ5;Q86T14			1.1441
ANKZF1;ZNF744	Ankyrin repeat and zinc finger domain-containing protein 1;cDNA FLJ57244, highly similar to Ankyrin repeat and zinc fingerdomain-containing protein 1	Q9H8Y5;B4DZT1;B4E0V1			1.1437
CAPZA1	F-actin-capping protein subunit alpha-1;Putative uncharacterized protein CAPZA1 (Fragment)	P52907;A8K0T9;A8MV55	1.1486	1.1066	1.1758
CLIP1;CYLN1;RSN	CLIP1 protein;Isoform Long of CAP-Gly domain-containing linker protein 1;Isoform Short of CAP-Gly domain-containing linker protein 1;cDNA FLJ45045 fis, clone BRAWH3021580, highly similar to Restin	A0AVD3;O43667;Q17RS4;P30622-1;P30622;Q29RG0;Q6P5Z9;P30622-2;B3KXA5;Q59GJ4	0.97522	1.3231	1.1304
ACO2;RP3-347H13.8-002	Aconitase 2, mitochondrial;Aconitate hydratase, mitochondrial;cDNA FLJ50886, highly similar to Aconitate hydratase, mitochondrial	A2A274;Q99798;B2RBW5;B4DEC3;B4DJW1;B4DLY4;B4DZ08;Q71UF1;B4DW08	1.1581	1.1148	1.1548
SEC61B	Protein transport protein Sec61 subunit beta	P60468;Q53FA5	1.2535	1.1024	1.0684
NSF	Vesicle-fusing ATPase;similar to Vesicle-fusing ATPase	P46459;A8K2D9;B4DFA2;B4DGR3;B4DH19;B4DSK5;Q96D47;Q9H3V6	1.1905	1.1069	1.1254
GRPEL1;GREPEL1	GrpE protein homolog 1, mitochondrial;cDNA FLJ52947, highly similar to GrpE protein homolog 1, mitochondrial	Q9HAV7;B2R783;B4DWV5	1.222	1.1235	1.0759
LAT2;LAB;NTAL;WBS15;WBSCR15;WBSCR5;HSPC046	Isoform 1 of Linker for activation of T-cells family member 2;Isoform 2 of Linker for activation of T-cells family member 2	Q9GZY6-1;Q9GZY6;A8K209;Q9GZY6-2		1.1404
SFPQ;PSF	Isoform Long of Splicing factor, proline- and glutamine-rich;Isoform Short of Splicing factor, proline- and glutamine-rich	P23246-1;P23246;Q6PIX2;Q86VG2;Q9BSV4;P23246-2	1.1093	1.1021	1.208
HLA-DPA1;HLA-DP1A;HLASB;XXbac-BCX22I16.5-006;DAQB-22D21.1-002;XXbac-BCX22I16.5-008	HLA class II histocompatibility antigen, DP alpha chain;Major histocompatibility complex, class II, DP alpha 1;Major histocompatibility complex, class II, DP alpha 1;Major histocompatibility complex, class II, DP alpha 1	P20036;Q5STP1;Q95HB9;A2ABA5;A2ALJ2;A2BET7;B0V052;B0V0C5;B0V0J9;B0V0T5;B0V1E0;B1ATF1;B1AZT5;A2ALJ3;A2BET9;A9YWH7;B0V053;B0V0C6;B0V0K0;B0V0T6;B0V1E1;B1ATF2;B1AZT6;O19680;O46883;O78000;O98050;P79554;Q29ZN0;Q29ZN1;Q29ZN2;Q29ZN3;Q29ZN4;Q2Q060;Q2Q061;Q49U27;Q49U29;Q49U31;Q49U33;Q49U35;Q49U37;Q49U39;Q49U41;Q49U43;Q49U45;Q49U47;Q49U49;Q49U51;Q49U53;Q49U55;Q49U57;Q49U59;Q49U61;Q49U63;Q49U65;Q49U67;Q49U69;…	1.1013	1.1572	1.1593
ITGB2;CD18;MFI7	Integrin beta-2;Integrin beta	P05107;B3KTS8;B4E0R1;Q53HS5;Q6PJ75;A8MYE6;Q8WWJ8	1.1758	1.114	1.1274
USO1;VDP	Putative uncharacterized protein DKFZp451D234	O60763;B2RAQ0;Q86TB8	1.158	1.0547	1.2028
PSMD1	Isoform 1 of 26S proteasome non-ATPase regulatory subunit 1;Isoform 2 of 26S proteasome non-ATPase regulatory subunit 1	Q99460-1;Q99460;B2R6D0;Q05BX4;Q05CW6;Q99460-2	1.1461	1.1585	1.1088
HNRNPC;HNRPC;HNRNPCL1;HNRPCL1	Isoform C1 of Heterogeneous nuclear ribonucleoproteins C1/C2;Isoform C2 of Heterogeneous nuclear ribonucleoproteins C1/C2;Isoform 4 of Heterogeneous nuclear ribonucleoproteins C1/C2;cDNA FLJ53542, highly similar to Heterogeneous nuclear ribonucleoproteins C;Isoform 3 of Heterogeneous nuclear ribonucleoproteins C1/C2;Heterogeneous nuclear ribonucleoprotein C-like 1	P07910-2;P07910;B2R5W2;B3KX96;P07910-1;A8K9A4;B2R603;P07910-4;B4DY08;P07910-3;O60812;B2RP44;Q6PKD2	0.94239	1.4041	1.0662
PDCD6IP;AIP1;ALIX;KIAA1375	PDCD6IP protein	Q8WUM4;B4DHD2;Q4W4Y1;Q6NUS1	1.1462	1.0815	1.1849
	cDNA FLJ35689 fis, clone SPLEN2019379, highly similar to INTERFERON-REGULATED RESISTANCE GTP-BINDING PROTEIN MXA	Q86YP5;Q8NAA8	1.2022	1.1781	1.0321
DKFZp686F1612;CARS;hCG_16441	cysteinyl-tRNA synthetase isoform c;Isoform 1 of Cysteinyl-tRNA synthetase, cytoplasmic;cDNA FLJ59563, highly similar to Cysteinyl-tRNA synthetase;Isoform 2 of Cysteinyl-tRNA synthetase, cytoplasmic;cysteinyl-tRNA synthetase isoform d	B4DPV7;Q5HYE4;P49589-1;P49589;Q53HG6;B4DKY1;P49589-2;A8K067;B4DI19;A8MVQ3	1.2389	1.1444	1.0284
ENO3	Beta-enolase;cDNA FLJ53926, highly similar to Beta-enolase	P13929;B4DUM6;Q9NPL4;B4DUI6	1.063	1.1069	1.2401
ARF4;ARF2	ADP-ribosylation factor 4;14 kDa protein	P18085;B2R7J7	1.1076	1.1531	1.1484
ARF1;ARF3	ADP-ribosylation factor 1;ADP-ribosylation factor 3;cDNA FLJ51215, highly similar to ADP-ribosylation factor 1;cDNA FLJ57770, moderately similar to ADP-ribosylation factor 3	P84077;P61204;A8K6G8;B4DEB9;B4DN70;B4DJC8;B4E190	1.0733	1.1529	1.1793
PGK1;PGKA;MIG10;OK/SW-cl.110	Phosphoglycerate kinase 1;cDNA FLJ53125, highly similar to Phosphoglycerate kinase 1;cDNA FLJ53770, highly similar to Phosphoglycerate kinase 1	P00558;A8K4W6;B4DHM5;B4E1H9;B4DHB3	1.0872	1.0707	1.2461
ENO1;ENO1L1;MBPB1;MPB1	Isoform alpha-enolase of Alpha-enolase;Isoform MBP-1 of Alpha-enolase	P06733-1;P06733;A4QMW8;A4UCS8;B2RD59;Q53FT9;Q53HR3;Q96GV1;Q9BT62;Q9UCH6;P06733-2	1.0968	1.1002	1.2069
PPCS;COAB;RP11-163G10.1-003	Phosphopantothenate--cysteine ligase;phosphopantothenoylcysteine synthetase isoform b	Q9HAB8;Q5VVM0		1.1652	1.1038
NOLA2;NHP2;HSPC286	H/ACA ribonucleoprotein complex subunit 2;nucleolar protein family A, member 2	Q9NX24;Q96P96;A6NKY8	1.0775	1.1427	1.1824
HLA-DRB3;HLA-DR3B	MHC class II antigen;HLA class II histocompatibility antigen, DRB3-2 beta chain;HLA class II histocompatibility antigen, DRB3-1 beta chain	A0ZXY9;A6MWD7;A7MA46;O19726;Q15BP8;Q2F6I0;Q2PPD0;Q30131;Q30137;Q3LTJ7;Q4U4M5;Q507L8;Q5SP44;Q6LBW5;Q7YPT7;Q7YQ62;Q860I9;Q860Y7;Q8HWN0;Q8HWN1;Q8MGY5;Q8SNB6;Q8WLT7;Q8WLT8;Q95HM7;Q95HM8;Q95IE9;Q95IF8;Q9BD18;Q9TP01;Q9TP02;Q9UIN3;Q9UIN4;Q9UQT9;P01913;P79483;B5AU12;B5AU13;B5AU14;O02875;O19507;O19590;O19593;O46701;O46794;O62902;O78162;O78187;O78188;O78199;Q30135;Q3LTJ9;Q4PNL5;Q5STE0;Q6LBW6;Q6LBW9;Q6YJU6;…	1.1126	1.0933	1.1959
NDUFS5	NADH dehydrogenase [ubiquinone] iron-sulfur protein 5	O43920;Q6IBA0	1.2218	1.0305	1.149
CAST	calpastatin isoform a;calpastatin isoform g;calpastatin isoform h;calpastatin isoform e;calpastatin isoform f;Isoform 1 of Calpastatin;Isoform 2 of Calpastatin;calpastatin isoform b;Isoform 4 of Calpastatin;calpastatin isoform l;CAST protein (Fragment);cDNA FLJ77737, highly similar to Homo sapiens calpastatin (CAST), transcript variant 3, mRNA	Q59HE3;Q05DE8;P20810-1;P20810;Q13940;Q9Y2M4;P20810-2;P20810-4;Q7Z4K0;P20810-3;B2RCJ7;Q86YM9;Q6AZE3;A8K8C4;B2RDU1;Q15786		1.1327
NME1;NDPKA;NM23	non-metastatic cells 1, protein (NM23A) expressed in isoform a;Nucleoside diphosphate kinase A;9 kDa protein	Q86XQ2;P15531;Q6FGK3	1.1598	1.0038	1.2343
CAPZA2	F-actin-capping protein subunit alpha-2;Putative uncharacterized protein CAPZA2;20 kDa protein;cDNA FLJ50113, highly similar to F-actin capping protein alpha-2 subunit;cDNA FLJ51827, highly similar to F-actin capping protein alpha-2 subunit	P47755;A4D0V4;Q53GC7;Q53GE2;A8MW68;B4DE01;B4DG50	1.0996	1.1747	1.1234
C15orf24;C11orf3;HT022;UNQ905/PRO1926	UPF0480 protein C15orf24;22 kDa protein;19 kDa protein	Q9NPA0;B2RC00	1.182	1.1614	1.0535
TAP2;DAAP-57C1.2-001;DADB-78A10.1-001;DASS-193J13.1-001;DAMC-27I8.2-001;ABCB3;PSF2;RING11;Y1;DAMC-27I8.2-002;DAAP-57C1.2-002;DADB-78A10.1-002;DAMA-353C16.1-002;DAQB-69D7.2-002;DASS-193J13.1-002;XXbac-BCX32M13.2-002;XXbac-BPG246D15.3-002;hCG_2001583	transporter 2, ATP-binding cassette, sub-family B isoform 1;Transporter 2, ATP-binding cassette, sub-family B;Antigen peptide transporter 2;cDNA FLJ57033, highly similar to Antigen peptide transporter 2;Transporter 2, ATP-binding cassette, sub-family B;transporter 2, ATP-binding cassette, sub-family B isoform 2	Q53FI6;Q59H06;Q5HY71;Q96PT8;B0V2J8;Q03519;O95410;Q5JNW1;Q9UMW6;Q9UQ60;B4DS72;B0V2J7;Q15547;Q96P38;Q9H4M2;Q9UP03	1.2261	1.0663	1.1042
RABIF;MSS4;RASGRF3	Guanine nucleotide exchange factor MSS4	P47224;B2R4P4;Q53EV1	1.1316
IL4I1;FIG1;UNQ636/PRO1265	interleukin 4 induced 1 isoform 2;Isoform 1 of L-amino-acid oxidase	Q96RQ9-2;Q96RQ9;A2RRH1;Q1WMJ3;Q96RQ9-1		1.1316
PPP1R7;SDS22	Isoform 1 of Protein phosphatase 1 regulatory subunit 7;Protein;Isoform 2 of Protein phosphatase 1 regulatory subunit 7;34 kDa protein;32 kDa protein;Isoform 3 of Protein phosphatase 1 regulatory subunit 7;Putative uncharacterized protein PPP1R7;Isoform 4 of Protein phosphatase 1 regulatory subunit 7;Putative uncharacterized protein PPP1R7	Q15435-1;Q15435;Q15435-2;B4DFD4;Q15435-3;B5MBZ8;Q15435-4;B5MCY6	1.1209	1.1296	1.1443
ANKRD44	Isoform 2 of Ankyrin repeat domain-containing protein 44;Isoform 1 of Ankyrin repeat domain-containing protein 44;Isoform 4 of Ankyrin repeat domain-containing protein 44	Q8N8A2-2;Q8N8A2;Q8N8A2-1;Q53SL9;Q8N8A2-4	1.1764	1.0981	1.1202
HDGF;HMG1L2;RP11-66D17.10-003;RP11-66D17.10-002;hCG_1775235	Hepatoma-derived growth factor;hepatoma-derived growth factor isoform b;hepatoma-derived growth factor isoform c	P51858;B2RDE8;Q5SZ07;A8K8G0;B3KU21;Q5SZ08	1.1437	1.1405	1.1104
PSMA1;PROS30;PSC2	Isoform Long of Proteasome subunit alpha type-1;Isoform Short of Proteasome subunit alpha type-1;Proteasome subunit alpha type;cDNA FLJ57957, highly similar to Proteasome subunit alpha type 1;cDNA FLJ57764, highly similar to Proteasome subunit alpha type 1	P25786-2;P25786;P25786-1;A8K400;A8MVJ4;Q53YE8;B4DEV8;B4E0X6	1.1101	1.121	1.1596
CAP1;CAP	adenylyl cyclase-associated protein;Adenylyl cyclase-associated protein 1	B2RDY9;B4DI38;B4DNW7;B4DNY3;Q01518	1.1594	1.0668	1.1639
PPP2R4;RP11-247A12.4-010;hCG_30599;PTPA;RP11-247A12.4-020;RP11-247A12.4-017;RP11-247A12.4-012;RP11-247A12.4-021;RP11-247A12.4-018	Protein phosphatase 2A activator, regulatory subunit 4;Isoform 2 of Serine/threonine-protein phosphatase 2A regulatory subunit B';Protein phosphatase 2A activator, regulatory subunit 4;Isoform 1 of Serine/threonine-protein phosphatase 2A regulatory subunit B';Isoform 3 of Serine/threonine-protein phosphatase 2A regulatory subunit B';cDNA FLJ54705, highly similar to Serine/threonine-protein phosph…	A9IZU4;Q15257-1;Q15257;Q5T948;A6PVN5;Q15257-2;Q15257-3;B4DXM4;B4DZF8;A6PVN9;Q5T949;Q15257-4;A2A347;A6PVN6;A6PVN8		1.0979	1.1611
SLC39A14;KIAA0062;ZIP14	Isoform 1 of Zinc transporter ZIP14;solute carrier family 39 (zinc transporter), member 14 isoform b;Isoform 2 of Zinc transporter ZIP14	Q15043-1;Q15043;B4DIW3;B6EU88;Q15043-2			1.1295
PRDX2;NKEFB;TDPX1;hCG_172488	Peroxiredoxin-2;cDNA FLJ60461, highly similar to Peroxiredoxin-2;Putative uncharacterized protein PRDX2	P32119;B4DF70;A6NIW5	1.1256	1.1141	1.145
PFDN4;PFD4	Prefoldin subunit 4	Q9NQP4;B2R548	1.2676	0.99042	1.1259
	similar to peptidyl-Pro cis trans isomerase		1.1433	1.0376	1.2015
GAK	Cyclin G-associated kinase	O14976;B4DS37;Q59HA5;Q5U4P5		1.1272
SEC22B;SEC22L1	Vesicle-trafficking protein SEC22b	O75396;A8K1G0	1.1214	1.1544	1.1043
MYCBP;AMY1	MYCBP protein;C-Myc-binding protein	Q6IB68;Q99417;B2R4N0	1.3116	0.94152
	UPF0538 protein C2orf76	Q3KRA6	1.1729	1.08
NMI	N-myc-interactor	Q13287;A4UCT9;A8K683;B4DQD4;B5BU69;Q8WTW2	1.2512	0.99384	1.1337
NPLOC4;KIAA1499;NPL4	Isoform 2 of Nuclear protein localization protein 4 homolog;Isoform 1 of Nuclear protein localization protein 4 homolog	Q8TAT6-2;Q8TAT6;B4DG89;Q8TAT6-1	1.0438	1.3717	0.9604
VPS35;MEM3;TCCCTA00141	Vacuolar protein sorting-associated protein 35	Q96QK1;Q53FR4;Q5HYM2	1.1225	1.0628	1.1904
MGST1;GST12;MGST	Microsomal glutathione S-transferase 1;12 kDa protein	P10620;A8K533;Q6LET6	0.80304	1.0085	1.5638
BAG2	BAG family molecular chaperone regulator 2	O95816;B3KM36;B3KN59;B4DXE2	1.0876	1.1831	1.1046
GATAD2B;KIAA1150	Transcriptional repressor p66-beta	Q8WXI9;B3KSZ4			1.1248
PSMA6;PROS27	Proteasome subunit alpha type-6;Similar to Prosomal P27K protein	P60900;B2R7J9;B4DQR4;B4DXJ9;Q9BZ93	1.1017	1.1708	1.1014
BNIP1;NIP1;SEC20L;TRG8	Isoform 1 of Vesicle transport protein SEC20;Isoform 3 of Vesicle transport protein SEC20;Isoform 2 of Vesicle transport protein SEC20;Isoform 4 of Vesicle transport protein SEC20	Q12981-4;Q12981;Q12981-1;Q12981-2;Q12981-3			1.1246
NDUFV1;UQOR1	Isoform 1 of NADH dehydrogenase [ubiquinone] flavoprotein 1, mitochondrial;Isoform 2 of NADH dehydrogenase [ubiquinone] flavoprotein 1, mitochondrial;cDNA FLJ57201, highly similar to NADH-ubiquinone oxidoreductase 51 kDa subunit, mitochondrial	P49821-1;P49821;B4DE93;Q53G70;Q6IBR3;Q96ID4;P49821-2;B4DUN7		1.1101	1.1391
OGDH	2-oxoglutarate dehydrogenase E1 component, mitochondrial;cDNA FLJ59557, highly similar to 2-oxoglutarate dehydrogenase E1 component, mitochondrial;OGDH protein (Fragment)	Q02218;A2VCT3;B4DF00;B4DH65;B4DZ95;B4E2U9;B4DK55;B4E3E9;A2VCT2;A5XEI0	1.2195	1.0776	1.0759
GNAI2;GNAI2B;hCG_1997820	Galphai2 protein;Isoform 1 of Guanine nucleotide-binding protein G(i), alpha-2 subunit;Isoform 2 of Guanine nucleotide-binding protein G(i), alpha-2 subunit;cDNA FLJ61561, highly similar to Guanine nucleotide-binding protein G;27 kDa protein	Q6B6N3;P04899-1;P04899;Q93020;Q96C71;P04899-2;B3KP24;B3KTZ0;B3KX51;B4DYA0;B4E2X5;Q6LCB5	1.1435	1.0186	1.2105
GOT1	Aspartate aminotransferase, cytoplasmic	P17174;B2R6R7;Q2TU84	1.1805	1.1133	1.0782
PSMB3	Proteasome subunit beta type-3;13 kDa protein;12 kDa protein	P49720	1.1329	1.1014	1.1354
SPAG9;HSS;KIAA0516;MAPK8IP4;SYD1	Isoform 7 of C-jun-amino-terminal kinase-interacting protein 4;146 kDa protein;Isoform 1 of C-jun-amino-terminal kinase-interacting protein 4;145 kDa protein;Isoform 2 of C-jun-amino-terminal kinase-interacting protein 4;Isoform 4 of C-jun-amino-terminal kinase-interacting protein 4;Isoform 3 of C-jun-amino-terminal kinase-interacting protein 4;Isoform 5 of C-jun-amino-terminal kinase-interacting…	O60271-7;O60271;O60271-1;A6H8U5;O60271-2;Q719J0;Q7Z5Q8;O60271-4;B4DHH2;B4DS36;Q5JB53;O60271-3;O60271-5		1.1229
VPS26A;VPS26	Vacuolar protein sorting-associated protein 26A;vacuolar protein sorting 26 A isoform 2	O75436;A8K3C1;B2RDD3;B4DLT1;A8MZ56	1.1166	1.1183	1.1334
PPP3R1;CNA2;CNB;WDR92	Calcineurin subunit B type 1;HZGJ	P63098;B2RC10;B5MDU4;Q96MX6;Q6QHF3;Q86YQ0;Q96CR6	1.1224
CSNK2A2;CK2A2	Casein kinase II subunit alpha'	P19784	1.1853	1.0941	1.0864
UGDH	UDP-glucose 6-dehydrogenase	O60701;B3KUU2;B4DN25;Q9NQ81;Q9NQ82;Q9NQ83;Q9NY20	1.1585	1.0852
PSMD7;MOV34L	26S proteasome non-ATPase regulatory subunit 7	P51665;B2RD27;B4DXI8	1.1415	1.1201	1.1023
LGALS3;MAC2	Galectin-3	P17931;B2RC38;Q59FR8;Q6FGL0;Q6IBA7;Q6NVH9;Q86TY5;Q8IXB9	1.259	0.97329	1.1316
PSMC3;TBP1	26S protease regulatory subunit 6A	P17980;A8K781;B2R8V1	1.1685	1.1179	1.0756
ACOT7;BACH	Isoform 1 of Cytosolic acyl coenzyme A thioester hydrolase;acyl-CoA thioesterase 7 isoform hBACHa;Isoform 5 of Cytosolic acyl coenzyme A thioester hydrolase;Isoform 6 of Cytosolic acyl coenzyme A thioester hydrolase;Isoform 3 of Cytosolic acyl coenzyme A thioester hydrolase;Isoform 2 of Cytosolic acyl coenzyme A thioester hydrolase;27 kDa protein	O00154-1;O00154;A8K232;O00154-4;A8K0K7;B3KQ12;O00154-5;A8K837;O00154-6;A8K6B8;B4DUX0;O00154-3;O00154-2	1.139	1.1112	1.1098
PSMD12;hCG_1749256	26S proteasome non-ATPase regulatory subunit 12;Putative uncharacterized protein PSMD12	O00232;A6NP15	1.1358	1.1008	1.1223
RAB2A;RAB2	Ras-related protein Rab-2A;24 kDa protein;21 kDa protein;Protein	P61019;B2R5W8;B4DMQ5;O75546	1.162	1.0725	1.1242
NUDCD2	NudC domain-containing protein 2	Q8WVJ2;B2R4V0		1.1187
RRS1;KIAA0112;RRR	Ribosome biogenesis regulatory protein homolog	Q15050		1.4168	0.81913
SLC25A1;SLC20A3;hCG_17246	Tricarboxylate transport protein, mitochondrial;cDNA FLJ60026, highly similar to Tricarboxylate transport protein, mitochondrial (Solute carrier family 25 (Mitochondrial carrier	P53007;A8K8E8;Q6LAP8;B4DP62	1.2082	1.0183	1.1271
LETM1	LETM1 and EF-hand domain-containing protein 1, mitochondrial	O95202;B4DED2	1.1929	1.1061	1.0541
ZBTB8OS;ARCH	cDNA FLJ75987, highly similar to Homo sapiens zinc finger and BTB domain containing 8 opposite strand (ZBTB8OS), mRNA;Isoform 2 of Protein archease;similar to ZBTB8OS protein	Q8IWT0-1;Q8IWT0;A8K0B5;Q8IWT0-2		1.1176
CHCHD3	Coiled-coil-helix-coiled-coil-helix domain-containing protein 3, mitochondrial	Q9NX63;A4D1N4	1.118	1.1063	1.1276
YWHAG	14-3-3 protein gamma;cDNA FLJ52141, highly similar to 14-3-3 protein gamma	P61981;B3KNB4;B4DHC4;B4DE78	1.085	1.0849	1.1809
URB1;C21orf108;KIAA0539;NPA1	Nucleolar pre-ribosomal-associated protein 1	O60287;B5ME92	0.67034	1.563
SLC29A1;ENT1	Solute carrier family 29 (Nucleoside transporters), member 1, isoform CRA_b	Q99808;B3KQV7;B3KQY5	1.2046	1.0281
DERA;CGI-26	Putative deoxyribose-phosphate aldolase	Q9Y315;Q53HN9;Q6PHW2	1.1031		1.1292
CORO7	Coronin-7	P57737;B3KSY4;B3KUH7;B4DFD6;B4DKU9;B4DL18;Q17RK4	1.0306	1.0983	1.2194
MIF;GLIF;MMIF	Macrophage migration inhibitory factor	P14174;A5Z1R8;A6MUU8;B2R4S3;Q6FHV0	1.0991	1.025	1.2237
ECHS1	Enoyl-CoA hydratase, mitochondrial	P30084	1.0989	1.125	1.1225
PDE6D;PDED	Retinal rod rhodopsin-sensitive cGMP 3',5'-cyclic phosphodiesterase subunit delta	O43924;Q6IB24		1.115
CSNK2A1;CK2A1;hCG_21984;hCG_39868	CSNK2A1 protein;Casein kinase II subunit alpha;Casein kinase 2 alpha isoform;Casein kinase II alpha subunit;casein kinase II alpha 1 subunit isoform b	B2R6D7;B5BUH5;Q5U5J2;P68400;Q5U065;Q2I0Y7;Q8NEV1;B4DYS6	1.2308	1.025	1.0892
ME2;hCG_23687	NAD-dependent malic enzyme, mitochondrial;Malic enzyme	P23368;B2R8J2;Q9BWL6	1.1405	1.1065	1.098
UBE2L3;UBCE7;UBCH7;MSK10	cDNA FLJ59750, highly similar to Ubiquitin-conjugating enzyme E2 L3;Ubiquitin-conjugating enzyme E2 L3;cDNA FLJ59174, highly similar to Ubiquitin-conjugating enzyme E2 L3;ubiquitin-conjugating enzyme E2L 3 isoform 2;Ubiquitin carrier protein	B4DSZ4;P68036;A8K4W8;B2R4A7;B4DDG1;A8MZN7	1.1076	1.1066	1.1282
PSMC1	26S protease regulatory subunit 4;33 kDa protein	P62191;B4DR63;Q53HB3;Q53XL8;Q6NW36	1.1379	1.0317	1.1716
SAPS1;KIAA1115;PP6R1	Isoform 1 of SAPS domain family member 1;Isoform 2 of SAPS domain family member 1;cDNA FLJ56462, highly similar to SAPS domain family member 1	Q9UPN7-1;Q9UPN7;Q9UPN7-2;Q96ID3;B4DLT9	1.1069	1.1395	1.0945
DIAPH1;DIAP1	Isoform 1 of Protein diaphanous homolog 1;diaphanous 1 isoform 2;Isoform 2 of Protein diaphanous homolog 1	O60610-1;O60610;B4E2I7;Q6URC4;A0RZB7;A0RZB8;B4DVR3;Q17RN4;Q96IL1;O60610-2;Q6UUU0;Q7KZJ7	1.1475	1.0754	1.1179
PSMB2	Proteasome subunit beta type-2	P49721	1.1769	1.0895	1.0719
RHOA;ARH12;ARHA;RHO12;RHOC;RP11-426L16.4-005;RP11-426L16.4-010	Transforming protein RhoA;Ras homolog gene family, member C;Ras homolog gene family, member C;12 kDa protein	P61586;B4DKN9;Q53HM4;Q9BVT0;Q5JR05;Q5JR07	1.1258	1.0857	1.1259
USP9X;DFFRX;USP9	ubiquitin specific protease 9, X-linked isoform 3;ubiquitin specific protease 9, X-linked isoform 4	Q93008-2;Q93008;Q93008-1;B4DGX9;Q59EZ5;Q6P468;Q86X58	1.084	1.077	1.1763
PSMA7;RP5-1005F21.4-005	Isoform 1 of Proteasome subunit alpha type-7;Isoform 2 of Proteasome subunit alpha type-7;Proteasome subunit alpha type	O14818-1;O14818;B2R515;Q05DH1;O14818-2;Q5JXJ2	1.0744	1.145	1.1176
KTN1;CG1;KIAA0004	Isoform 1 of Kinectin;cDNA FLJ61494, highly similar to Kinectin;Isoform 2 of Kinectin;kinectin 1 isoform b	Q86UP2-1;Q86UP2;Q5GGW3;B4DZ88;Q86UP2-2;B3KP76;Q3SWV9;Q6NZ46;Q6PDF7;B3KWP6;Q17RZ5	1.111	1.1309	1.0951
MRPL12;RPML12	39S ribosomal protein L12, mitochondrial	P52815;Q96Q74	1.2286	1.015	1.093
FAH	Fumarylacetoacetase;33 kDa protein;18 kDa protein	P16930;B2R9X1;Q53XA7	1.1248	1.1724	1.0392
NAPG;SNAPG	Gamma-soluble NSF attachment protein;cDNA FLJ61104, highly similar to Gamma-soluble NSF attachment protein	Q99747;Q6FHY4;B4DFC9	1.2118		1.0124
LARP5;KIAA0217	Putative uncharacterized protein LARP5;La-related protein 5	A6NEL6;Q92615;A7MD20		1.3855	0.83786
TPM4	Isoform 1 of Tropomyosin alpha-4 chain;Isoform 2 of Tropomyosin alpha-4 chain;cDNA FLJ52936, weakly similar to Tropomyosin alpha-4 chain	P67936-1;P67936;B4DVY2;Q5U0D9;P67936-2;B4DTB1;Q9UCS4	1.0754	1.0814	1.1775
PSMA2;PSC3	Proteasome subunit alpha type-2	P25787;Q53GF5;Q6ICS6;Q6MZI6	1.1183	1.094	1.1216
NDUFA9;NDUFS2L	NADH dehydrogenase [ubiquinone] 1 alpha subcomplex subunit 9, mitochondrial	Q16795;A8K4V2;Q9BTT5	1.209	1.0979	1.0266
CACYBP;S100A6BP;SIP;PNAS-107;RP1-102G20.6-002	Isoform 1 of Calcyclin-binding protein;cDNA FLJ36106 fis, clone TESTI2021531, highly similar to Calcyclin-binding protein	Q9HB71-1;Q9HB71;Q5R371;Q6NVY0;B3KSF1;Q5R370	1.1214	1.1091	1.1021
RAB11B;YPT3;RAB11A;RAB11	Ras-related protein Rab-11B;cDNA FLJ61136, highly similar to Ras-related protein Rab-11A	Q15907;A5YM50;B2R7I4;B4DMK0;B4DT13;Q5U0I1;Q6FHR0;Q6FI42;P62491;B2R4B6;B4DMN1	1.1152	1.1223	1.0909
PEX11B	Peroxisomal membrane protein 11B	O96011;B3KN85;B4DXH9		1.1092
PSMD8;hCG_42853	proteasome 26S non-ATPase subunit 8;26S proteasome non-ATPase regulatory subunit 8;cDNA FLJ52462, moderately similar to Mus musculus proteasome (prosome, macropain) 26S subunit, non-ATPase, 8 (Psmd8), mRNA	B4DX18;Q5U0B3;P48556;Q6P1L7;B4E2Y4	1.0853	1.0851	1.157
DPYSL2;CRMP2	Dihydropyrimidinase-related protein 2	Q16555;A8K5H2;A9CQZ2;B4DR31;Q53ET2;Q59GB4;Q8NAN9	0.99921	1.197	1.1306
PPP2R2A;PPP2R2D;KIAA1541	Serine/threonine-protein phosphatase 2A 55 kDa regulatory subunit B alpha isoform;Serine/threonine-protein phosphatase 2A 55 kDa regulatory subunit B delta isoform;CDNA FLJ26613 fis, clone MPB05565, highly similar to Serine/threonine protein phosphatase 2A, 55 kDa regulatory subunit B, alpha isoform	P63151;B2RBU8;Q66LE6;Q6ZP32	1.1452	1.0726
EFTUD1	Isoform 1 of Elongation factor Tu GTP-binding domain-containing protein 1;Isoform 2 of Elongation factor Tu GTP-binding domain-containing protein 1;Isoform 3 of Elongation factor Tu GTP-binding domain-containing protein 1	Q7Z2Z2-1;Q7Z2Z2;Q7Z2Z2-2;B3KPR5;Q7Z2Z2-3		1.1088
STAT1	Isoform Alpha of Signal transducer and activator of transcription 1-alpha/beta;83 kDa protein;Isoform Beta of Signal transducer and activator of transcription 1-alpha/beta	P42224-1;P42224;A8K989;B2RCA0;Q68D00;P42224-2;Q53XW4	1.1075	1.1269	1.0915
PEX14	Peroxisomal membrane protein PEX14	O75381;B2R7N1;B3KML6	0.94508	1.271
STMN1;LAP18;OP18;RP1-125I3.5-006;RP1-125I3.5-004	Stathmin;Stathmin;Stathmin;Stathmin	P16949;B2R4E7;B5BU83;Q96CE4;A2A2D2;A2A2D0;Q59G27	1.115	1.0071	1.202
PPIA;CYPA	similar to peptidylprolyl isomerase A-like;Peptidyl-prolyl cis-trans isomerase A;Peptidyl-prolyl cis-trans isomerase;cDNA FLJ53060, moderately similar to Peptidyl-prolyl cis-trans isomerase A;Peptidyl-prolyl cis-trans isomerase	P62937;A8K220;A8K486;B2RE56;Q567Q0;Q71V99;B4DM82;A8MSH2	1.0682	1.1594	1.0953
C2orf4;MEMO1;NS5ATP7;CGI-27	C2orf4 protein;Protein MEMO1;mediator of cell motility 1 isoform 2;RcC2orf4 (Fragment)	Q5R2V8;Q9Y316;A8K3Y8;B4DLS0;Q2VIM3	1.037	1.171	1.1145
GPI	Glucose-6-phosphate isomerase;cDNA FLJ56429, highly similar to Glucose-6-phosphate isomerase;Glucose-6-phosphate isomerase;cDNA FLJ53666, highly similar to Glucose-6-phosphate isomerase	P06744;Q9BRD3;B4DE36;B4DG39;B4DVJ0	1.1003	1.0262	1.1953
TIFA;T2BP	TRAF-interacting protein with FHA domain-containing protein A	Q96CG3	1.1149	1.0914	1.1144
LBR	Lamin-B receptor	Q14739;B2R5P3	1.4053	0.91911	0.99373
UBQLN1;DA41;PLIC1;UBQLN2;N4BP4;PLIC2;HRIHFB2157	Isoform 1 of Ubiquilin-1;Isoform 2 of Ubiquilin-1;Ubiquilin-2;cDNA FLJ56541, highly similar to Ubiquilin-2;cDNA FLJ60127, highly similar to Ubiquilin-2	Q9UMX0-1;Q9UMX0;B3KNI2;B3KNI8;Q5T6J9;Q9UMX0-2;Q59FJ2;Q5T6J5;Q9UHD9;Q5D027;B4DZF1;B4DM19	1.0829	1.0009	1.2331
SRPRB;PSEC0230	Signal recognition particle receptor subunit beta;11 kDa protein	Q9Y5M8;Q549N5;Q6P595	1.0731	1.2143	1.0276
BCAT2;BCATM;BCT2;ECA40	Branched chain aminotransferase 2, mitochondrial variant;Isoform A of Branched-chain-amino-acid aminotransferase, mitochondrial;cDNA FLJ36308 fis, clone THYMU2004916, highly similar to Branched-chain-amino-acid aminotransferase, mitochondrial	Q53EW7;O15382-1;O15382;B2RB87;O15382-2;B3KSI3	1.1612	0.97946	1.1743
PSMC5;SUG1;hCG_41818	26S protease regulatory subunit 8;Proteasome (Prosome, macropain) 26S subunit, ATPase, 5, isoform CRA_b;Proteasome 26S ATPase subunit 5 variant (Fragment)	P62195;A8K763;A8K3Z3;Q59GS3	1.1314	1.0871	1.0954
C1QBP;GC1QBP;HABP1;SF2P32	Complement component 1 Q subcomponent-binding protein, mitochondrial;20 kDa protein;16 kDa protein	Q07021;A8K651	1.1226	1.1251	1.0649
ATL3	Isoform 1 of Atlastin-3	Q6DD88-1;Q6DD88;B4DXC4	1.1848	1.0735	1.0527
SUMO1;SMT3C;SMT3H3;UBL1;OK/SW-cl.43;LOC391257	16 kDa protein;Small ubiquitin-related modifier 1;LOC391257 protein	P63165;B2R4I5;Q6P094	1.3197	1.0129	0.97728
NUDC;NPD011	Nuclear migration protein nudC;Putative uncharacterized protein NUDC (Fragment);NPD011;24 kDa protein	Q9Y266;A8MU04;Q9H2R7	1.1418	1.0966	1.0713
HRSP12;PSP	Ribonuclease UK114;11 kDa protein;8 kDa protein	P52758;Q6IBG0	1.2004	0.95316	1.1538
SF3B3;KIAA0017;SAP130	Isoform 1 of Splicing factor 3B subunit 3	Q15393-1;Q15393;A8K6V3;B3KM77;B3KQH1	1.0792	1.1236	1.103
CPOX;CPO;CPX	Coproporphyrinogen III oxidase, mitochondrial	P36551;A8K275;B4DSD5;Q53F08	1.1541	1.0776	1.0694
UBE2G1;UBE2G	26 kDa protein;Ubiquitin-conjugating enzyme E2 G1	P62253;B2R7P2	1.0434	1.0836	1.1741
PIK3R4	Phosphoinositide 3-kinase regulatory subunit 4	Q99570;A0JP11;B2RAJ6	0.98681	1.2121
NUDT4;DIPP2;KIAA0487;HDCMB47P	Isoform 2 of Diphosphoinositol polyphosphate phosphohydrolase 2;Isoform 3 of Diphosphoinositol polyphosphate phosphohydrolase 2	Q9NZJ9-2;Q9NZJ9;B2RE29;Q9NZJ9-3		1.099
PSMD13	HSPC027	Q9UNM6;B2RBM7;B4DJ66;Q53GN6;Q53XU2;Q9UNM7;Q9Y6E3	1.1368	1.0663	1.0924
GBP2;hCG_1811329	Interferon-induced guanylate-binding protein 2;cDNA, FLJ95085, highly similar to Homo sapiens guanylate binding protein 2, interferon-inducible(GBP2), mRNA	P32456;Q6GPH0;Q8TCE5;Q6IAU2		1.0908	1.106
PSMA5	Proteasome subunit alpha type-5	P28066;B2R8F6;B4E2V4;Q5U0A0	1.0985	1.118	1.0783
TPM3;RP11-205M9.1-009;DKFZp686J1372;RP11-205M9.1-010;hCG_1997142;RP11-205M9.1-005;RP11-205M9.1-011	Isoform 2 of Tropomyosin alpha-3 chain;tropomyosin 3 isoform 4;Putative uncharacterized protein DKFZp686J1372;Isoform 3 of Tropomyosin alpha-3 chain;tropomyosin 3 isoform 5;Tropomyosin 3;cDNA FLJ50720, highly similar to Homo sapiens tropomyosin 3 (TPM3), transcript variant 2, mRNA;Tropomyosin 3	P06753-2;P06753;B2RDE1;Q2QD06;Q5VU66;Q5HYB6;Q5VU59;P06753-3;Q5VU72;B4DQ80;Q5VU61;Q6LDX7;Q8NAG3;Q8NI98;B4DWT5;Q5VU63	1.0363	1.0982	1.1599
XPO7;KIAA0745;RANBP16	exportin 7 isoform a;exportin 7 isoform c;Exportin-7	A8K607;Q9UIA9;B4DSP8	1.2329	0.88982	1.1712
PSME2	Putative uncharacterized protein PSME2;proteasome activator subunit 2	Q9UL46;A8MZ76;Q2TNB3;Q6FHK9;Q86SZ7	1.1006	1.0962	1.0968
PSMD5;KIAA0072	26S proteasome non-ATPase regulatory subunit 5;cDNA FLJ52877, highly similar to 26S proteasome non-ATPase regulatory subunit 5	Q16401;A8K4T6;B4DZM8	1.2035	1.1137	0.97635
EIF4A2;DDX2B;EIF4F;hCG_1784041	Isoform 2 of Eukaryotic initiation factor 4A-II;Isoform 1 of Eukaryotic initiation factor 4A-II;Eukaryotic translation initiation factor 4A, isoform 2, isoform CRA_b;25 kDa protein;cDNA FLJ58834, highly similar to Eukaryotic initiation factor 4A-II;26 kDa protein;25 kDa protein	Q14240-2;Q14240;Q14240-1;Q53XJ6;Q86WD0;Q96B07;Q9NZE6;B4DJX6	1.195	0.97449	1.1237
DHPS;DS	Isoform Long of Deoxyhypusine synthase;Isoform Short of Deoxyhypusine synthase;deoxyhypusine synthase isoform c	P49366-1;P49366;A8K688;P49366-2	1.037		1.1583
TPI1;TPI	Isoform 1 of Triosephosphate isomerase;cDNA FLJ52069, highly similar to Triosephosphate isomerase;Isoform 2 of Triosephosphate isomerase;22 kDa protein;Triosephosphate isomerase (Fragment);similar to rcTPI1 isoform 4	P60174-1;P60174;Q53HE2;Q6FHP9;B4DUI5;P60174-2;Q2QD09	1.003	1.0907	1.1979
AMPD2	Adenosine monophosphate deaminase 2;98 kDa protein;Isoform Ex1B-3 of AMP deaminase 2;Isoform Ex1A-2-3 of AMP deaminase 2;Isoform Ex1A-3 of AMP deaminase 2	Q01433-1;Q01433;B2RB47;Q5T694;Q01433-4;B4DZI5;Q01433-2;B4DK50;Q5T695;Q01433-3;Q5T693	1.0965
ACADSB	Short/branched chain specific acyl-CoA dehydrogenase, mitochondrial	P45954;B4DQ51;Q5SQN6	1.1107	1.0819	1.0951
C11orf73;HSPC138;HSPC179;HSPC248	Uncharacterized protein C11orf73	Q53FT3	1.087	1.0393	1.1613
MAPBPIP;HSPC003;RP11-336K24.9;RP11-336K24.9-003;RP11-336K24.9-002	Mitogen-activated protein-binding protein-interacting protein;Mitogen-activated protein-binding protein-interacting protein;Mitogen-activated protein-binding protein-interacting protein	Q9Y2Q5;Q5VY97;Q5VY98	1.0773	1.1525	1.0572
USP5;ISOT	Isoform Long of Ubiquitin carboxyl-terminal hydrolase 5;Isoform Short of Ubiquitin carboxyl-terminal hydrolase 5	P45974-1;P45974;P45974-2	1.0653	1.1151	1.1065
KIAA0196	Putative uncharacterized protein KIAA0196 (Fragment);Strumpellin	Q53EL1;Q12768;A8K4R7;B4DLF2	1.0459	1.1441
HNRNPA2B1;HNRPA2B1	Isoform B1 of Heterogeneous nuclear ribonucleoproteins A2/B1;43 kDa protein;Isoform A2 of Heterogeneous nuclear ribonucleoproteins A2/B1;HNRPA2B1 protein	P22626-1;P22626;P22626-2;Q9BWA9	0.92325	1.3058	1.0558
FKBP1A;FKBP1;FKBP12	Peptidyl-prolyl cis-trans isomerase FKBP1A	P62942;Q1JUQ3;Q3V793;Q9UH88	1.1387	0.98821	1.1577
SH3BGRL3;P1725;RP11-569G9.2-002	Putative uncharacterized protein;SH3 domain-binding glutamic acid-rich-like protein 3;SH3 domain binding glutamic acid-rich protein like 3	Q86Z22;Q9H299;Q5T122;Q5T123		1.0674	1.1222
MX1	Interferon-induced GTP-binding protein Mx1	P20591;B2RDA5;B3KU10;Q96CI3	1.0768	1.1344	1.0725
NDUFAF2;NDUFA12L	Mimitin, mitochondrial	Q8N183;A8K5I1		1.1295	1.0593
DKFZp781C0425;BET1	Putative uncharacterized protein DKFZp781C0425;BET1 homolog	Q68DU7;O15155;Q53XK0;Q96EA0	1.2565	0.8325	1.1925
RAB18;RP11-148B2.1-005;RP11-148B2.1-003	Ras-related protein Rab-18;RAB18 long isoform 1;RAB18, member RAS oncogene family;RAB18, member RAS oncogene family	Q9NP72;B3KMC7;Q56UN9;Q5W0I9;Q59EW3;Q5W0J0	1.0984	1.1185	1.0623
SERPINB1;ELANH2;MNEI;PI2	Leukocyte elastase inhibitor	P30740;A8K5L2;B4DNT0;B4E3A8	1.2493	1.0167	1.0131
AKR1A1;ALDR1;ALR	Alcohol dehydrogenase [NADP+]	P14550;A8KAL8;Q6IAZ4	1.1291	1.0106	1.138
TMEM11;C17orf35;PM1	Transmembrane protein 11;19 kDa protein	P17152;Q53YB2		1.0922
PFN1	Profilin-1	P07737;Q53Y44	1.1225	1.0499	1.1035
UGP2;UGP1	cDNA FLJ56155, highly similar to UTP--glucose-1-phosphate uridylyltransferase 2;Isoform 1 of UTP--glucose-1-phosphate uridylyltransferase;Isoform 2 of UTP--glucose-1-phosphate uridylyltransferase	B4DUP2;Q16851-1;Q16851;B2RAN1;Q53QE9;Q16851-2	1.1306	1.076	1.0684
PSMD10;RP5-889N15.3-006;RP5-889N15.3-004;RP5-889N15.3-002	26S proteasome non-ATPase regulatory subunit 10;Proteasome (Prosome, macropain) 26S subunit, non-ATPase, 10;Proteasome (Prosome, macropain) 26S subunit, non-ATPase, 10;proteasome 26S non-ATPase subunit 10 isform 2	O75832;Q5U0B2;B1AJY7;B1AJY5;Q8IZK9	1.0524	1.1154	1.1065
HSD17B10;ERAB;HADH2;SCHAD;XH98G2;RP3-339A18.2-004	Isoform 1 of 3-hydroxyacyl-CoA dehydrogenase type-2;Isoform 2 of 3-hydroxyacyl-CoA dehydrogenase type-2;Hydroxysteroid (17-beta) dehydrogenase 10	Q99714-1;Q99714;Q6IBS9;Q99714-2;Q5H927;Q5H928	1.0901	1.1159	1.0678
UBTF;UBF;UBF1	Isoform UBF1 of Nucleolar transcription factor 1;Isoform UBF2 of Nucleolar transcription factor 1;Ribosomal RNA upstream binding transcription factor (Fragment)	P17480-1;P17480;A8K6R8;A8K962;P17480-2;B4DLB0;B4DNQ1;Q05BZ1;Q9BQR2;O00164		1.4081	0.77429
DHX16;DBP2;DDX16;KIAA0577;DADB-129D20.3-002;DAMA-178G23.3-002;DAMC-83F13.2-002;DASS-182C6.7-002;XXbac-BCX48F10.8-002;XXbac-BPG27H4.6-002;hCG_26008;DAQB-47P19.12-001;DAAP-285E11.5-001;DAQB-47P19.12-002;DAAP-285E11.5-002	Putative pre-mRNA-splicing factor ATP-dependent RNA helicase DHX16;DEAH;DEAD/H (Asp-Glu-Ala-Asp/His) box polypeptide 16;DEAH (Asp-Glu-Ala-His) box polypeptide 16;DEAD/H (Asp-Glu-Ala-Asp/His) box polypeptide 16;DEAH (Asp-Glu-Ala-His) box polypeptide 16	O60231;B4DZ28;Q5SQH4;Q6PKC8;Q5SQH5;Q5JP45;B0V0F8;Q5JP46;Q9P186;B0V0F7		1.0911
QDPR;DHPR;hCG_39606	Dihydropteridine reductase;Quinoid dihydropteridine reductase, isoform CRA_e	P09417;A8K158;B3KW71	1.2783	0.9445	1.0503
LACTB2;CGI-83	Beta-lactamase-like protein 2	Q53H82;A8K2D6	1.1117	1.0659	1.0953
	22 kDa protein		1.2362	1.2586	0.77729
UBE2V2;MMS2;UEV2	Ubiquitin-conjugating enzyme E2 variant 2;12 kDa protein	Q15819;A0M8W4	1.1434	1.0567	1.0714
GDI2;RABGDIB;RP11-318E3.2-002;RP11-318E3.2-005	cDNA FLJ60299, highly similar to Rab GDP dissociation inhibitor beta;GDP dissociation inhibitor 2 isoform 2;GDP dissociation inhibitor 2	P50395;B4DLV7;Q6IAT1;B3KVE3;Q5SX88;Q8TB95;Q5SX87	1.1155	1.0859	1.0681
DSTN;ACTDP;DSN;hCG_2019292	Destrin;destrin isoform b	P60981;B2R6N2;B4DYA6	1.0868	0.986	1.1965
GTF3C3	Isoform 1 of General transcription factor 3C polypeptide 3	Q9Y5Q9-1;Q9Y5Q9;Q4ZG48		1.0895
CRNKL1;CRN;CGI-201;MSTP021	Isoform 1 of Crooked neck-like protein 1;Crn, crooked neck-like 1;Isoform 3 of Crooked neck-like protein 1	Q9BZJ0-1;Q9BZJ0;Q9BZJ0-2;A8K9T4;Q5JY65;Q69YP1;Q8IXG0;Q9BZJ0-3		1.0895
LARS;KIAA1352	Leucyl-tRNA synthetase, cytoplasmic;cDNA FLJ58466, highly similar to Leucyl-tRNA synthetase, cytoplasmic	Q9P2J5;A7E266;B2RCM2;B4DER1;Q0VGM8;Q2YDT1;Q6NVI4;A2RRR4;B3KXA9;B4DJ10;B4E266;Q2TU79;Q9H8E3;Q9HAM7;Q9NPU8;Q9NVC0;Q9NVP8	1.0969	1.1124	1.0583
RUVBL2;TIP48;TIP49B;CGI-46	RuvB-like 2	Q9Y230;B3KNL2;B3KQ59	1.126	1.1116	1.0296
NOLA1;GAR1	26 kDa protein;Isoform 1 of H/ACA ribonucleoprotein complex subunit 1;Isoform 2 of H/ACA ribonucleoprotein complex subunit 1	Q9NY12-1;Q9NY12;Q9NY12-2		1.0914	1.0865
MYLC2B;MRLC2;MRLC3;MLCB;RLC;MYL9;MLC2;MRLC1;MYRL2	Myosin regulatory light chain MRCL3 variant;Myosin regulatory light chain MRLC2;Myosin regulatory light chain MRLC3;Myosin regulatory light chain;Myosin regulatory light polypeptide 9;13 kDa protein	Q53HL1;O14950;P19105;Q2F834;Q53X45;P24844;Q6IBG1;Q71U02	0.89554	1.3177	1.0535
RBBP4;RBAP48	Histone-binding protein RBBP4;46 kDa protein;retinoblastoma binding protein 4 isoform b;retinoblastoma binding protein 4 isoform c	Q09028;B2R6G9;B4DRH0;B4DRT0	1.0535	1.2411	0.97189
OGFR	Isoform 1 of Opioid growth factor receptor;OGFR protein;Isoform 2 of Opioid growth factor receptor;67 kDa protein;OGFR protein	Q9NZT2-1;Q9NZT2;B3KMQ6;Q05BV5;Q4VXW3;Q9NZT2-2;Q4VXW4;Q6PK21		1.1111	1.0657
NDUFAF1;CIA30;CGI-65	Complex I intermediate-associated protein 30, mitochondrial	Q9Y375		1.0883
MYO1C variant protein;MYO1C	myosin IC isoform a;myosin IC isoform b;Myosin-Ic;56 kDa protein	Q4LE56;O00159;A1L180	0.89151	1.1868	1.1855
C20orf77	Regulation of nuclear pre-mRNA domain-containing protein 1B	Q9NQG5	1.084	1.0595	1.1203
RNH1;PRI;RNH	Ribonuclease inhibitor;Ribonuclease/angiogenin inhibitor	P13489;Q59GB3;Q96FD7;Q9BQ80;Q8IZK8	1.1198	0.98318	1.1599
RUVBL1;NMP238;TIP49;TIP49A	Isoform 1 of RuvB-like 1;Isoform 2 of RuvB-like 1;cDNA FLJ34844 fis, clone NT2NE2011154, highly similar to RuvB-like 1	Q9Y265-1;Q9Y265;B2R5S0;B5BUB1;Q9Y265-2;B3KRS7	1.1053	1.133	1.0245
SACM1L;KIAA0851	Phosphatidylinositide phosphatase SAC1	Q9NTJ5;B3KX17;B4DK71;B4DVV3;Q68D59		1.0876
PARK7	Protein DJ-1	Q99497;B2R4Z1	1.0892	1.0414	1.1319
SETD3;C14orf154	Isoform 1 of SET domain-containing protein 3;Isoform 2 of SET domain-containing protein 3;Putative uncharacterized protein SETD3	Q86TU7-1;Q86TU7;A5PLP0;B4DZE8;Q86TU7-2;A0PJU3;Q86TU7-3;Q6NXR6		1.0874
VPS29;DC7;DC15;MDS007	26 kDa protein;Isoform 2 of Vacuolar protein sorting-associated protein 29;Isoform 1 of Vacuolar protein sorting-associated protein 29	Q9UBQ0-2;Q9UBQ0;Q9UBQ0-1;Q5JPE4	1.0913	1.1039	1.0666
BAK;BAK1;BCL2L7;CDN1	Pro-apoptotic protein BAKM variant;Putative uncharacterized protein DKFZp686D0345	B3KRK7;Q8NFF3;Q16611;A8K7S8;B4DEB4;Q5HCI0;Q6I9T6	1.0723	1.1014
PSMA4;PSC9	Proteasome subunit alpha type-4;27 kDa protein;Proteasome subunit beta type;26 kDa protein;proteasome alpha 4 subunit isoform 2;20 kDa protein	P25789;B2RDG0;Q53XP2;Q7Z474;Q567Q5	1.0921	1.0527	1.1154
FAM114A2;C5orf3	Isoform 1 of Protein FAM114A2;Isoform 2 of Protein FAM114A2;cDNA FLJ54229	Q9NRY5-1;Q9NRY5;Q9NRY5-2;B2R8D8;B3KTE4;B4DQT0;B4E1J2		1.0865
NDUFS2	NADH dehydrogenase [ubiquinone] iron-sulfur protein 2, mitochondrial	O75306;Q53HG2;Q9HC11;Q9HC12	1.1345	1.1723	0.9522
PSMC2;MSS1	26S protease regulatory subunit 7	P35998;A4D0Q1;Q3LIA5;Q75L23	1.167	1.0556	1.0352
IPO9;IMP9;KIAA1192;RANBP9;HSPC273	Importin-9	Q96P70;B1ASV5	1.0947	1.0222	1.1402
SUMO2;SMT3B;SMT3H2;SUMO3;hCG_401304;SMT3A;SMT3H1;SUMO4;hCG_2044856;SMT3H4	Small ubiquitin-related modifier 2;SMT3 suppressor of mif two 3 homolog 2 isoform b precursor;10 kDa protein;SMT3 suppressor of mif two 3 homolog 2 isoform b precursor;Putative uncharacterized protein SUMO2;cDNA FLJ57440, moderately similar to Small ubiquitin-related modifier 3;Putative uncharacterized protein SUMO2;Small ubiquitin-related modifier 3;SMT3 suppressor of mif two 3 homolog 4;Small u…	P61956;B2R4I2;A8MU27;B4DUW4;A8MUA9;P55854;B2R5X4;A1L3W5;Q6EEV6	1.0148	1.0925	1.1491
RAB3GAP1;KIAA0066;RAB3GAP	Isoform 1 of Rab3 GTPase-activating protein catalytic subunit	Q15042-1;Q15042;A6H8Z3	1.1395	1.0326	1.0842
ATP6V1B2;ATP6B2;VPP3	V-type proton ATPase subunit B, brain isoform;Similar to Vacuolar ATP synthase subunit B, brain isoform	P21281;B2R5Z3;B4DFM5;B4DQI9;Q59HF3	1.1605	0.98896	1.1058
PYGB	Glycogen phosphorylase, brain form	P11216;B4DSD8;Q59GM9	1.1183	1.0426	1.0937
G6PD	Isoform Long of Glucose-6-phosphate 1-dehydrogenase;glucose-6-phosphate dehydrogenase isoform a;Isoform Short of Glucose-6-phosphate 1-dehydrogenase;cDNA FLJ56794, highly similar to Glucose-6-phosphate 1-dehydrogenase;37 kDa protein;Glucose-6-phosphate dehydrogenase	P11413-2;P11413;A8K8D9;P11413-1;Q0PHS4;Q2Q9B7;Q2Q9H2;Q2VF42;B4DYA7;Q0PHS1;A2IBT6;A7IZZ3;Q0PHS2;Q0PHS3;Q0PHS5;Q0PHS6	1.1034	1.0434	1.1065
RAB7A;RAB7	Ras-related protein Rab-7a	P51149;B4DPH9	1.0934	1.0734	1.0854
ATPIF1;ATPI	Putative uncharacterized protein DKFZp564G0422	Q9UII2;Q5JXL8;Q6IAQ7;Q9BSL9		1.084
RAB21;KIAA0118	Ras-related protein Rab-21	Q9UL25;Q96GX3	1.0898	1.0801	1.082
MAT2B;TGR;MSTP045;Nbla02999;UNQ2435/PRO4995	Isoform 1 of Methionine adenosyltransferase 2 subunit beta;Isoform 2 of Methionine adenosyltransferase 2 subunit beta;Isoform 4 of Methionine adenosyltransferase 2 subunit beta;Isoform 3 of Methionine adenosyltransferase 2 subunit beta	Q9NZL9-1;Q9NZL9;A8K7A4;B2R5Y6;Q9NZL9-2;Q9NZL9-4;Q9NZL9-3	1.0152	1.0023	1.2343
NUTF2;NTF2	Nuclear transport factor 2	P61970;B2R4G7	1.1402	1.039	1.071
CSNK2B;DADB-127H9.2-004;DAMA-236L13.2-004;DAMC-157M7.2-004;DAQB-195H10.8-004;DASS-336N12.7-004;XXbac-BCX88C14.4-004;hCG_43725;CK2N;G5A;DADB-127H9.2-002;DAMA-236L13.2-002;DAMC-157M7.2-002;DAQB-195H10.8-002;DASS-336N12.7-002;XXbac-BCX88C14.4-002;XXbac-BPG32J3.6-002	Casein kinase 2, beta polypeptide;Casein kinase II subunit beta;Casein kinase 2, beta polypeptide;18 kDa protein	Q5SRQ6;P67870;B0UXA9;Q5SRQ3	1.1362	1.0852	1.0287
ALDH9A1;ALDH4;ALDH7;ALDH9	aldehyde dehydrogenase 9A1;4-trimethylaminobutyraldehyde dehydrogenase	B4DX14;P49189;B2R6X1;B4DE91;B4DXY7;B4DYY1	1.0748	1.0708	1.1038
RANBP6	Ran-binding protein 6	O60518;B4DTX6;B4E340	1.0158	1.1546	1.0779
ABHD11;WBSCR21;PP1226	Isoform 1 of Abhydrolase domain-containing protein 11;Isoform 4 of Abhydrolase domain-containing protein 11	Q8NFV4-1;Q8NFV4;Q8NFV4-4		1.0827
SLC25A10;DIC	Isoform 2 of Mitochondrial dicarboxylate carrier;Isoform 1 of Mitochondrial dicarboxylate carrier;25 kDa protein	Q9UBX3-2;Q9UBX3;Q9UBX3-1;B4DLN1;B4E1E9;Q542Z3		0.99978	1.1655
PSMB1;PSC5	Proteasome subunit beta type-1;Proteasome beta 1 subunit variant (Fragment)	P20618;B5BU76;Q53FT8;Q59GN1	1.0759	1.0703	1.1013
STAT2	Isoform Long of Signal transducer and activator of transcription 2;Isoform Short of Signal transducer and activator of transcription 2	P52630-1;P52630;A0JLQ9;B4DLC7;B4DLC8;Q6LD48;Q6N0A7;Q9UDL4;P52630-2	1.2031	0.95687	1.0867
PSMC4;MIP224;TBP7	Isoform 1 of 26S protease regulatory subunit 6B;similar to 26S proteasome ATPase subunit;Isoform 2 of 26S protease regulatory subunit 6B	P43686-1;P43686;A8K2M0;P43686-2	1.1236	1.0199	1.1015
FLII;FLIL	Protein flightless-1 homolog;cDNA FLJ50164, highly similar to Protein flightless-1 homolog;cDNA FLJ51784, highly similar to Protein flightless-1 homolog	Q13045;B4DIX0;B4DIL0;B4DNA8;Q59H95	1.0059	1.113	1.1259
RPIA;RPI	Ribose-5-phosphate isomerase;Ribose-5-phosphate isomerase	P49247;Q53R32;Q53SB2	1.1727	1.0916	0.97998
COX6B1;COX6B	12 kDa protein;Cytochrome c oxidase subunit VIb isoform 1	P14854;B2R5C9	1.174	0.98875
ARHGDIB;GDIA2;GDID4;RAP1GN1	Rho GDP-dissociation inhibitor 2;21 kDa protein;21 kDa protein;13 kDa protein	P52566;B2R4F3;B5BU79	1.0325	1.092	1.1194
LRBA;BGL;CDC4L;LBA	Lipopolysaccharide-responsive and beige-like anchor protein	P50851;B3KVI6;Q4W5J4;Q4W5L6;Q59HC1;Q68D03;Q6P1X2;Q8NFQ0;Q969R7	1.075	1.0418	1.1236
HSPA4L;APG1;OSP94;hCG_37382	Heat shock 70 kDa protein 4L;cDNA FLJ55529, highly similar to Heat shock 70 kDa protein 4L	O95757;A2ICT2;B3KNM0;B4DXT2;B4DZR0;Q53ZP9	1.117	1.116	1.0059
PSMD11	Proteasome 26S non-ATPase subunit 11 variant (Fragment)	O00231;A8K3I7;B4DTS5;Q53FT5	1.0942	1.1147	1.03
EIF3B;EIF3S9	Isoform 2 of Eukaryotic translation initiation factor 3 subunit B;Isoform 1 of Eukaryotic translation initiation factor 3 subunit B	P55884-2;P55884;P55884-1;A4D208;A4D210;B4DV79;B4DXN6;Q59FS8;Q86UM1;Q96G38	1.1206	1.0195	1.0978
DNAJC13;KIAA0678;RME8	DnaJ homolog subfamily C member 13;84 kDa protein	O75165;A7E2Y5;B3KN02;Q0D2M7	1.0561	0.96339	1.2184
PSMD3	26S proteasome non-ATPase regulatory subunit 3	O43242;B3KMW9;B3KNN7;B4DEB0;B4DPM7;B4DT72;B4DV84;Q6IBN0;Q8N9M2;Q96N86	1.0572	1.0891	1.0902
UFC1;CGI-126;HSPC155	Ufm1-conjugating enzyme 1	Q9Y3C8;A8K9R1;Q5VTX1	1.1502	1.0374	1.0481
C1orf77;HT031;PP7704;RP1-178F15.2-002;RP1-178F15.2-005	Isoform 2 of Uncharacterized protein C1orf77;Isoform 1 of Uncharacterized protein C1orf77;24 kDa protein;Chromosome 1 open reading frame 77;Chromosome 1 open reading frame 77	Q9Y3Y2-3;Q9Y3Y2;Q0VAQ8;Q9Y3Y2-1;Q5T7Y9;Q5T7Y7		1.0784
PAFAH1B1;LIS1;MDCR;MDS;PAFAHA	Isoform 1 of Platelet-activating factor acetylhydrolase IB subunit alpha;cDNA FLJ51164, highly similar to Platelet-activating factor acetylhydrolase IB alpha subunit;cDNA FLJ52123, highly similar to Platelet-activating factor acetylhydrolase IB alpha subunit	P43034-1;P43034;B2R7Q7;A8MYH0;B4DZN3;B4DF38	1.0789	1.076	1.0798
PSD2	PH and SEC7 domain-containing protein 2	Q9BQI7	1.0781
RAB1A;RAB1	Isoform 1 of Ras-related protein Rab-1A;23 kDa protein;Isoform 2 of Ras-related protein Rab-1A	P62820-1;P62820;Q5U0I6;P62820-2;Q96RD8	1.1016	1.0023	1.1302
ISCU;NIFUN	Isoform 1 of Iron-sulfur cluster assembly enzyme ISCU, mitochondrial;Isoform 2 of Iron-sulfur cluster assembly enzyme ISCU, mitochondrial;cDNA FLJ32689 fis, clone TESTI2000207, highly similar to NifU-like N-terminal domain-containing protein, mitochondrial;cDNA FLJ59835, highly similar to NifU-like N-terminal domain-containing protein, mitochondrial;cDNA FLJ51257, highly similar to NifU-like N-te…	Q9H1K1-1;Q9H1K1;Q9H1K1-2;B3KQ30;B4DDI1;B4DNC9;B1P7G3	1.0164	1.1391
AP1S2;DC22;DKFZp779P0659	cDNA FLJ60015, highly similar to Adapter-related protein complex 1 sigma- 1B subunit;hypothetical protein;cDNA FLJ52741, highly similar to Mus musculus adaptor-related protein complex 1, sigma 2 subunit (Ap1s2), mRNA;Putative uncharacterized protein AP1S2;Putative uncharacterized protein DKFZp779P0659;Protein	B4DIM6;P56377;B4DSU4;Q549M9;A6NH01;Q7Z677	0.99557	1.1594
DIABLO;SMAC	Diablo homolog, mitochondrial precursor;diablo isoform 3 precursor;Isoform 2 of Diablo homolog, mitochondrial;19 kDa protein;18 kDa protein	Q9NR28-1;Q9NR28;B2RDQ0;Q53HB7;Q6W3F3;Q9NR28-2;Q502X2	1.0251	0.99176	1.2142
NIT1;RP11-544M22.11-002	Isoform 4 of Nitrilase homolog 1;Isoform 2 of Nitrilase homolog 1;Isoform 5 of Nitrilase homolog 1;Isoform 1 of Nitrilase homolog 1;Putative uncharacterized protein NIT1 (Fragment);Nitrilase 1	Q86X76-3;Q86X76;Q86X76-1;B1AQP3;B2R8D1;Q86X76-4;Q86X76-2;A8MVF4;B1AQP4	1.4923	0.82247	0.91625
DCTD;hCG_17052	dCMP deaminase isoform a;Deoxycytidylate deaminase;cDNA FLJ52248, highly similar to Deoxycytidylate deaminase	Q5M7Z8;P32321;B2R836;B4DDC2	1.0052	0.97993	1.2449
GART;PGFT;PRGS	Isoform Long of Trifunctional purine biosynthetic protein adenosine-3;Isoform Short of Trifunctional purine biosynthetic protein adenosine-3	P22102-1;P22102;A8K945;A8KA32;B4DJ93;Q15374;Q3B7A7;Q59HH3;Q71VH3;P22102-2;Q52M77	1.1183	1.0701	1.041
RAB1B;rab1b;RAB1C	Ras-related protein Rab-1B;Small GTP-binding protein;RAB1B protein;Putative Ras-related protein Rab-1C	Q9H0U4;A8K7S1;Q92927;Q6FIG4;Q92928	1.0761	1.0527	1.1006
CPSF7	Isoform 1 of Cleavage and polyadenylation specificity factor subunit 7;Isoform 2 of Cleavage and polyadenylation specificity factor subunit 7	Q8N684-1;Q8N684;B3KU04;B4DGF8;Q8N684-2		1.1541	0.99862
TIPRL	Isoform 1 of TIP41-like protein;Isoform 2 of TIP41-like protein	O75663-1;O75663;B2R8V3;O75663-2	0.9844	1.2236	1.0196
RAB3GAP2;KIAA0839	Isoform 1 of Rab3 GTPase-activating protein non-catalytic subunit	Q9H2M9-1;Q9H2M9;A6H8V0;B3KNG8	1.1058	0.99261	1.1289
CHUK;IKKA;TCF16	Inhibitor of nuclear factor kappa-B kinase subunit alpha	O15111;Q562E6;Q59GT1		1.0754
PSMC6;SUG2	proteasome 26S ATPase subunit 6;44 kDa protein	P62333;B2R975	1.1324	1.0464	1.0447
CCT1;CCTA;TCP1	T-complex protein 1 subunit alpha;T-complex protein 1 isoform b	P17987	1.1085	1.0406	1.0744
SEC24D;KIAA0755	Isoform 2 of Protein transport protein Sec24D;Isoform 1 of Protein transport protein Sec24D;CDNA FLJ20702 fis, clone KAIA2174	O94855-2;O94855;Q4W5D3;O94855-1;A8K6V0;B3KM89;B3KWV9;Q49AI3;Q9NWP5		1.0646	1.0829
PPIF;CYP3	Peptidyl-prolyl cis-trans isomerase, mitochondrial	P30405;B2R6X6		1.1404	1.007
GMFB	Glia maturation factor, beta;18 kDa protein	P60983;B2R499;Q9BS35	1.0878	0.93555	1.1952
UBA3;UBE1C	NEDD8-activating enzyme E1 catalytic subunit;ubiquitin-activating enzyme 3 isoform 2;13 kDa protein	Q8TBC4;A8K027;B2RBP3;A6NLB5		1.0727
TSNAX;TRAX;RP11-17H4.1-003	Translin-associated protein X;Translin-associated factor X	Q99598;B1APC6;Q5VVQ1;Q9NRI2	1.0901	1.1218	1.0058
VAPB;UNQ484/PRO983	Isoform 1 of Vesicle-associated membrane protein-associated protein B/C;Putative uncharacterized protein VAPB	O95292-1;O95292;B3KVU7;Q53XM7;A6NLV9;Q6ZSP7	1.1099	1.035
CCDC58	Coiled-coil domain-containing protein 58	Q4VC31	1.1086	0.959	1.1495
CUGBP1;BRUNOL2;CELF1;CUGBP;NAB50	Isoform 4 of CUG-BP- and ETR-3-like factor 1;Isoform 1 of CUG-BP- and ETR-3-like factor 1;Isoform 3 of CUG-BP- and ETR-3-like factor 1;Isoform 2 of CUG-BP- and ETR-3-like factor 1	Q92879-4;Q92879;Q92879-1;B4E2U5;Q92879-3;Q92879-2		1.0719
CFL1;CFL	Cofilin-1;cDNA FLJ51435, moderately similar to Cofilin-1	P23528;B3KUQ1;B4E112	1.06	1.0751	1.0796
SEC23IP;MSTP053	Isoform 1 of SEC23-interacting protein;Isoform 2 of SEC23-interacting protein	Q9Y6Y8-1;Q9Y6Y8;B3KM47;B3KN10;B4DWG1;Q9Y6Y8-2	1.0059	1.0706	1.1381
SMU1	WD40 repeat-containing protein SMU1;cDNA FLJ54259, highly similar to Smu-1 suppressor of mec-8 and unc-52 protein homolog	Q2TAY7;A0MNN4;A8MXW4;B4E3L0	1.0544	1.1001	1.0589
AKT2	RAC-beta serine/threonine-protein kinase;AKT2 protein;25 kDa protein	P31751;B2RBD8;B3KP61;B4DG79;Q05BV0;Q0VAN0		1.0645	1.0776
RALB;hCG_17321	cDNA FLJ55177, highly similar to Ras-related protein Ral-B;V-ral simian leukemia viral oncogene homolog B (Ras related	P11234;B4E040;B4E364;Q53T32;Q6ZS74		0.94811	1.1937
HSPA9;GRP75;HSPA9B	Stress-70 protein, mitochondrial	P38646;A1XP52;Q2F839;Q8N1C8	1.0975	1.062	1.0529
RHOG;ARHG	Rho-related GTP-binding protein RhoG	P84095;Q6ICQ8	1.0285	1.0356	1.1477
PPP5C;PPP5	Serine/threonine-protein phosphatase 5;Serine/threonine protein phosphatase	P53041;B2R6R6;B4DDZ8;B4DLP6;Q53FR0;Q53XV2;Q9BPW0;A8MU39	1.1496	0.96896	1.0928
COPZ1;COPZ;CGI-120;HSPC181	Coatomer subunit zeta-1;cDNA FLJ59844, highly similar to Coatomer subunit zeta-1	P61923;Q53FU3;B4DDX8	1.0908	1.0532	1.0634
LDHB	L-lactate dehydrogenase B chain;L-lactate dehydrogenase;15 kDa protein	P07195;Q5U077;A8MW50	1.1085	1.0688	1.0282
TERF2IP;RAP1;PP8000	Telomeric repeat-binding factor 2-interacting protein 1	Q9NYB0;B4DQN4;Q4W4Y2;Q5XKJ9		1.0685
NME1-NME2;hCG_2001850;NME2;NM23B	Nucleoside diphosphate kinase;NME1-NME2 protein;Nucleoside diphosphate kinase B	Q32Q12;Q1WM23;P22392;Q6FHN3	1.1162	1.0689	1.0201
C17orf25;GLOD4;CGI-150;My027	Uncharacterized protein C17orf25;Isoform 1 of Glyoxalase domain-containing protein 4;Isoform 2 of Glyoxalase domain-containing protein 4;cDNA FLJ59092;Isoform 3 of Glyoxalase domain-containing protein 4	A8K8F0;Q9Y3E8;Q9HC38-1;Q9HC38;Q9HC38-2;B3KV49;B4DX01;Q9HC38-3	1.0031	1.1449	1.0561
PSMB4	Proteasome subunit beta type-4	P28070;B2R9L3;B4DFL3;Q6IBI4	1.0537	1.0518	1.0984
SPR	Sepiapterin reductase;cDNA FLJ56734, moderately similar to Sepiapterin reductase	P35270;Q93041;Q9UEC5;B4DSF0		1.0679
ABHD10	Abhydrolase domain-containing protein 10, mitochondrial	Q9NUJ1	1.141	0.98169	1.0808
NDUFS1	cDNA FLJ55978, highly similar to NADH-ubiquinone oxidoreductase 75 kDa subunit, mitochondrial	P28331;B4DIN9;B4DJ81;B4DJA0;B4DPG1;B4DUC1;Q9P1A0	1.0995	1.1588	0.94513
CAPZB;RP4-657E11.7-008;hCG_41078;RP4-657E11.7-002;RP4-657E11.7-009;RP4-657E11.7-005	cDNA, FLJ93598, highly similar to Homo sapiens capping protein (actin filament) muscle Z-line, beta (CAPZB), mRNA;Isoform 2 of F-actin-capping protein subunit beta;cDNA FLJ60094, highly similar to F-actin capping protein subunit beta;Isoform 1 of F-actin-capping protein subunit beta;Capping protein (Actin filament) muscle Z-line, beta;Capping protein (Actin filament) muscle Z-line, beta;Capping p…	B2R7T8;P47756-2;P47756;B1AK87;Q32Q68;B1AK88;B4DWA6;P47756-1;B1AK85;B1AK86;B1AP83;B1AK84;B1AP81	1.023	1.0609	1.1184
MYO1E;MYO1C	Myosin-Ie	Q12965;Q4KMR3	0.98913	1.1318	1.0808
GATM;AGAT	cDNA FLJ56372, highly similar to Glycine amidinotransferase, mitochondrial;Isoform Mitochondrial of Glycine amidinotransferase, mitochondrial;Isoform Cytoplasmic of Glycine amidinotransferase, mitochondrial	B4DPI3;Q53EQ4;P50440-1;P50440;B4DH99;P50440-2	1.0559	1.0701	1.0757
LANCL1;GPR69A	LanC-like protein 1	O43813;B2R602;B4DGM7;Q53TN2;Q6FHH6	1.0692	1.0212	1.11
BAZ1A;ACF1;WCRF180;HSPC317	Isoform 1 of Bromodomain adjacent to zinc finger domain protein 1A;Isoform 2 of Bromodomain adjacent to zinc finger domain protein 1A	Q9NRL2-1;Q9NRL2;Q9NRL2-2;B3KND8;Q05CW0;Q32ND1;Q59G54		1.0664
PFAS;KIAA0361	Phosphoribosylformylglycinamidine synthase	O15067;A6H8V8;A8K8N7;A8K9T9;B4DJ26;Q6P4B4;Q9BR56	1.0807	1.0558	1.0617
TRA2A	Isoform Long of Transformer-2 protein homolog;Isoform Short of Transformer-2 protein homolog	Q13595-1;Q13595;B4DQI6;B4DUA9;Q549U1;Q13595-2			1.066
AP1G1;ADTG;CLAPG1	cDNA FLJ46199 fis, clone TESTI4007965, highly similar to AP-1 complex subunit gamma-1;adaptor-related protein complex 1, gamma 1 subunit isoform a;Putative uncharacterized protein;Putative uncharacterized protein	O43747;B3KXW5;Q8IY97;B4DS96;B4DDL1	1.1737	1.0278	0.99586
CS	Citrate synthase, mitochondrial;48 kDa protein;cDNA FLJ38537 fis, clone HCHON2001233, highly similar to Citrate synthase, mitochondrial	O75390;B4DJV2;B3KTN4;Q0QEL2	1.1466	1.0838	0.96695
NANS;SAS	Sialic acid synthase	Q9NR45;B2RE98	1.121	0.90718	1.1684
SUPT4H1;SPT4H;SUPT4H	Transcription elongation factor SPT4	P63272;B2R4X8	1.0951	0.75196	1.3495
RABGAP1;HSPC094	Isoform 1 of Rab GTPase-activating protein 1	Q9Y3P9-1;Q9Y3P9		1.0648
ETFB;FP585	Isoform 2 of Electron transfer flavoprotein subunit beta;Isoform 1 of Electron transfer flavoprotein subunit beta	P38117-2;P38117;B3KNY2;P38117-1;A8K766	1.0552	1.0772	1.0615
PFDN2;PFD2;HSPC231	Prefoldin subunit 2	Q9UHV9;B1AQP2	1.0863	0.9972	1.1102
RAB43;RAB41	Ras-related protein Rab-43;Putative Rab-43-like protein ENSP00000330714	Q86YS6;A8K4P9;A6NDJ8		1.0643
HERC4;KIAA1593	Isoform 1 of Probable E3 ubiquitin-protein ligase HERC4;Isoform 2 of Probable E3 ubiquitin-protein ligase HERC4;Isoform 3 of Probable E3 ubiquitin-protein ligase HERC4;Isoform 6 of Probable E3 ubiquitin-protein ligase HERC4	Q5GLZ8-1;Q5GLZ8;Q5VXS9;Q9Y4U2;Q5GLZ8-2;A8K9U4;Q5GLZ8-3;Q5GLZ8-6	1.0197	1.1011	1.0718
WDR43;KIAA0007	WD repeat-containing protein 43;21 kDa protein	Q15061;Q8TB67		1.0639
RANGRF;MOG1;RANGNRF;HSPC165;HSPC236;MDS5	Isoform 1 of Ran guanine nucleotide release factor;Isoform 2 of Ran guanine nucleotide release factor;Isoform 3 of Ran guanine nucleotide release factor;Isoform 4 of Ran guanine nucleotide release factor	Q9HD47-1;Q9HD47;Q9HD47-2;Q9HD47-3;Q9HD47-4		1.0637
ARPC4;ARC20	Actin-related protein 2/3 complex subunit 4;actin related protein 2/3 complex subunit 4 isoform b;Similar to Actin-related protein 2/3 complex subunit 4	P59998;B2RCJ2	1.0493	1.0785	1.0631
BLVRA;BLVR;BVR	Biliverdin reductase A	P53004;A8K747	1.027	1.0944	1.0685
CCT7;CCTH;NIP7-1	T-complex protein 1 subunit eta;chaperonin containing TCP1, subunit 7 isoform b	Q99832;A8K7E6;Q53HV2;Q6IBT3;A8MWI8	1.0677	1.0371	1.0846
UBE2K;HIP2;LIG	Isoform 1 of Ubiquitin-conjugating enzyme E2 K;Isoform 2 of Ubiquitin-conjugating enzyme E2 K;cDNA FLJ57995, moderately similar to Ubiquitin-conjugating enzyme E2-25 kDa;ubiquitin-conjugating enzyme E2-25K isoform 2	P61086-1;P61086;B2RDF8;P61086-2;A8K5Y9;B3KSH4;B4DIZ2	1.1034	1.0291	1.056
COPB2	Coatomer subunit beta'	P35606;B4DZI8	1.0416	1.0698	1.0757
ACTBL2	Beta-actin-like protein 2	Q562R1;B2RPJ1	0.99886	1.1498	1.0373
UROD;RP11-69J16.2-003	Uroporphyrinogen decarboxylase;Uroporphyrinogen decarboxylase	P06132;A8K762;Q53YB8;Q53ZP6;Q71UD5;Q5T450;Q71UD4	1.0895	1.0345	1.061
SEC23A	Protein transport protein Sec23A;cDNA FLJ52821, highly similar to Protein transport protein Sec23A	Q15436;B2R5P4;B3KXI2;B4DF60;B4DSQ5;B4E0Q9	1.0952	1.0277
TBCE	Tubulin-specific chaperone E	Q15813;A8K8C2	1.113	1.0963	0.97476
COPG;COPG1	Coatomer subunit gamma	Q9Y678;A8K6M8;B3KMF6;B3KW21;Q54AC4;Q8WUI6	1.0721	1.0585	1.053
LRRFIP1;GCF2;TRIP	Isoform 2 of Leucine-rich repeat flightless-interacting protein 1;Isoform 3 of Leucine-rich repeat flightless-interacting protein 1;Isoform 1 of Leucine-rich repeat flightless-interacting protein 1	Q32MZ4-2;Q32MZ4;Q32MZ4-3;Q05D04;Q32MZ4-1	1.0177	1.0079	1.158
GSTZ1;MAAI;hCG_22265	Maleylacetoacetate isomerase;glutathione transferase zeta 1 isoform 1;24 kDa protein;Glutathione transferase zeta 1 variant (Fragment);glutathione transferase zeta 1 isoform 3;glutathione transferase zeta 1 isoform 2	O43708;B2RCK3;B2RDN1;Q6IB17;Q59FU9;A6NNB8;A6NED0	1.0528	0.98735	1.1433
NUDT5;HSPC115	Putative uncharacterized protein NUDT5;ADP-sugar pyrophosphatase;Putative uncharacterized protein NUDT5;Putative uncharacterized protein NUDT5	A6NFX8;Q9UKK9;A8K516;A6NJU6;A6NHE8	1.0778	1.0223	1.0833
RTCD1;RPC;RPC1;RTC1	Isoform 2 of RNA 3'-terminal phosphate cyclase;Isoform 1 of RNA 3'-terminal phosphate cyclase	O00442-2;O00442;A8K8K1;Q5VVL5;O00442-1;B4DSL0;Q5VVL6	1.0378	1.1843	0.96079
SAMD9;C7orf5;DRIF1;KIAA2004;OEF1	Isoform 1 of Sterile alpha motif domain-containing protein 9;Isoform 3 of Sterile alpha motif domain-containing protein 9;Isoform 2 of Sterile alpha motif domain-containing protein 9	Q5K651-1;Q5K651;B3KWI1;B3KWI8;Q5K651-3;Q5K651-2		1.0604
SLC1A5;ASCT2;M7V1;RDR;RDRC	Neutral amino acid transporter B(0)	Q15758;A8K9H5;B4DWS4;Q59ES3;Q71UA6	1.1479	0.97287
RAB5A;RAB5	Ras-related protein Rab-5A	P20339;B4DJA5;Q6FI44	1.0115	1.1078	1.0603
NRBP1;BCON3;NRBP	61 kDa protein;Nuclear receptor-binding protein	Q9UHY1;B3KV40;B4DW31		1.0598
NIT2;CUA002	33 kDa protein;Nitrilase homolog 2	Q9NQR4;B2R9A3;B4DFB1	1.0424	1.0897	1.0472
YWHAB	Isoform Long of 14-3-3 protein beta/alpha;Isoform Short of 14-3-3 protein beta/alpha	P31946-1;P31946;A8K9K2;B5BU24;P31946-2	1.0516	1.0491	1.0782
GOSR2;GS27	Isoform B of Golgi SNAP receptor complex member 2;Isoform A of Golgi SNAP receptor complex member 2;23 kDa protein;cDNA FLJ61028, highly similar to Golgi SNAP receptor complex member 2;golgi SNAP receptor complex member 2 isoform C;19 kDa protein;17 kDa protein	O14653-2;O14653;O14653-1;B4E141;Q8N4B8	1.0802	1.1567	0.94159
SNX2;TRG9	Sorting nexin-2	O60749;B3KML1;B3KN44;B3KN57;B4DEK4;Q53GG3	0.96533	1.0602	1.1517
YWHAZ	14-3-3 protein zeta/delta;28 kDa protein;cDNA, FLJ79516, highly similar to 14-3-3 protein zeta/delta	P63104;A8K1N0;B0AZS6;Q2F831	1.0277	1.0099	1.1395
NAG	Isoform 1 of Neuroblastoma-amplified gene protein;Isoform 2 of Neuroblastoma-amplified gene protein	A2RRP1-1;A2RRP1;A2RRP1-2;Q4ZG05;Q53TK6	1.1883	0.92917
CDC37;CDC37A	Hsp90 co-chaperone Cdc37	Q16543;A1L0W4;Q53YA2;Q6FG59	1.0287	1.0658	1.0817
HBS1L;HBS1;KIAA1038;RP11-349J5.1-003	Isoform 1 of HBS1-like protein;Isoform 2 of HBS1-like protein;Isoform 3 of HBS1-like protein;HSPC276 (Fragment);HBS1-like	Q9Y450-1;Q9Y450;A8K9E1;B3KNB9;Q4VX90;Q9Y450-2;Q9Y450-3;Q4VX89;Q9P0A5;Q5T7G1		1.0587
NFU1;HIRIP5;CGI-33	NFU1 iron-sulfur cluster scaffold homolog, mitochondrial;HIRA interacting protein 5 isoform 1;HIRA interacting protein 5 isoform 3	Q9UMS0;B4DUL9	1.1111	0.99322	1.0711
XPOT	Exportin-T	O43592;A8KA19	1.1596	1.0784	0.93594
PSMD6;KIAA0107;PFAAP4;hCG_23509	26S proteasome non-ATPase regulatory subunit 6;Proteasome (Prosome, macropain) 26S subunit, non-ATPase, 6, isoform CRA_d;34 kDa protein	Q15008;A8K2E0;B3KT66;Q6UV22	1.0831	1.0783	1.0121
ALDOA;ALDA	cDNA FLJ56890, highly similar to Fructose-bisphosphate aldolase A;Fructose-bisphosphate aldolase A	B4DXI7;P04075;A4UCS9;A4UCT0;Q6FI10;Q9UCN2	1.0127	1.0029	1.1578
VTA1;C6orf55;HSPC228;My012;RP3-451B21.3-002	Vacuolar protein sorting-associated protein VTA1 homolog;Vps20-associated 1 homolog;LYST-interacting protein LIP5 (Fragment)	Q9NP79;Q5TGM0;Q9C063	1.0277		1.0875
TKT;DKFZp686J13123	cDNA FLJ54957, highly similar to Transketolase;transketolase isoform 2;cDNA FLJ32530 fis, clone SMINT2000185, highly similar to TRANSKETOLASE;37 kDa protein	P29401;A8K089;B4DE31;B4E022;Q53EM5;B3KSI4;B4DVU1;Q6MZE3;B3KPZ8	1.0486	1.0449	1.077
NDUFS8	NADH dehydrogenase [ubiquinone] iron-sulfur protein 8, mitochondrial;cDNA FLJ57061, highly similar to NADH-ubiquinone oxidoreductase 23 kDa subunit, mitochondrial	O00217;B2RB86;Q08E91;Q53G17;B4DYI3	1.065	1.1047	1.0001
HPRT1;HPRT	Hypoxanthine-guanine phosphoribosyltransferase;Putative uncharacterized protein HPRT1	P00492;B2R8M9;Q6LET3;A8MSU4	1.0441	1.0632	1.0622
STAT3;APRF	Isoform Del-701 of Signal transducer and activator of transcription 3	P40763-2;P40763	1.0495	1.0207	1.0991
NLN;AGTBP;KIAA1226;DKFZp564F123	Neurolysin, mitochondrial;NLN protein;cDNA FLJ14696 fis, clone NT2RP2005775, highly similar to NEUROLYSIN	Q9BYT8;A8K9T8;B3KU23;Q9BQD0;Q8NDD9;Q96K48	1.0859	1.0021	1.0813
PRPF8;PRPC8	Pre-mRNA-processing-splicing factor 8	Q6P2Q9;B4DK16;Q53GM6;Q6JH02;Q6JH03	0.9959	1.1225	1.0506
MRPS36;DC47	Putative uncharacterized protein MRPS36;28S ribosomal protein S36, mitochondrial	A8MWD6;P82909	1.0973	1.0158	1.0554
PRKACA;PKACA;PRKACB;RP11-82H13.1-005	Isoform 1 of cAMP-dependent protein kinase catalytic subunit alpha;Isoform 2 of cAMP-dependent protein kinase catalytic subunit alpha;Protein kinase, cAMP-dependent, catalytic, beta	P17612-1;P17612;A8K8B9;P17612-2;Q15136;B1APG4	1.0761	1.0981	0.99319
ARL2BP;BART;BART1	Isoform 1 of ADP-ribosylation factor-like protein 2-binding protein;Isoform 2 of ADP-ribosylation factor-like protein 2-binding protein;cDNA FLJ61153, highly similar to Homo sapiens ADP-ribosylation factor-like 2 binding protein (ARL2BP), mRNA	Q9Y2Y0-1;Q9Y2Y0;B3KQJ5;Q9Y2Y0-2;B4DQD8	1.0095	1.1019
AAMP	Angio-associated migratory cell protein	Q13685;Q59EM1		1.0556
IDE	Insulin-degrading enzyme	P14735;B2R721;B3KSB8;Q59GA5	1.1603	0.94319	1.0629
COPS5;CSN5;JAB1	COP9 signalosome complex subunit 5;COP9 signalosome subunit 5 variant (Fragment)	Q92905;Q59GH5	1.1374	0.99718	1.0314
EIF3A;EIF3S10;KIAA0139	Eukaryotic translation initiation factor 3 subunit A	Q14152;B1AMV5;B4DYS1;Q05BS0;Q24JU4;Q3B770;Q6P1R0;Q7Z5T5	1.1069	0.95502	1.1028
GMFG	Glia maturation factor gamma	O60234;Q6IB37;Q8TDZ6	1.0494	0.96203	1.1524
PMPCB;MPPB	Mitochondrial-processing peptidase subunit beta;cDNA FLJ58513, highly similar to Mitochondrial-processing peptidase subunit beta, mitochondrial	O75439;A8K1E9;B3KM34;B3KQ85;Q96CP5;Q9UG64;B4DM90	1.143	0.9656
LSM1;CASM	U6 snRNA-associated Sm-like protein LSm1	O15116;B2R5E6	1.0194	0.97878	1.1644
MAGOHB;MAGOH2;MAGOH;RP5-1024G6.4-002;hCG_33396	Protein mago nashi homolog 2;Protein mago nashi homolog;12 kDa protein;Putative uncharacterized protein MAGOHB;Mago-nashi homolog, proliferation-associated;11 kDa protein	Q96A72;P61326;B2R5A2;A6NEC0;B1ARP8	0.9824	1.0831	1.0967
TSN	Translin	Q15631;B3KRM8;Q53GR3	1.0846	1.0006	1.0765
FAM49B;BM-009;BM009	Protein FAM49B;33 kDa protein;Putative uncharacterized protein BM009	Q9NUQ9;Q68D08;Q9NW21;Q3ZTR9		0.97749	1.1301
EIF4A3;DDX48;KIAA0111	Eukaryotic initiation factor 4A-III	P38919;Q6IBQ2	0.9403	1.1656	1.055
RAB14	Ras-related protein Rab-14;20 kDa protein	P61106;B3KR31	1.0678	1.0134	1.0793
CORO1C;CRNN4	Coronin-1C_i3 protein;cDNA FLJ50992, highly similar to Coronin-1C	Q9ULV4;A7MAP0;A7MAP1;B3KN06;B3KU12;B4E3S0;Q53G58;Q59EA2;B4DMH3	0.92248	1.1153	1.1227
UBA6;MOP4;UBE1L2	Isoform 1 of Ubiquitin-like modifier-activating enzyme 6;Isoform 2 of Ubiquitin-like modifier-activating enzyme 6	A0AVT1-1;A0AVT1;B2RAV3;B3KSS1;A0AVT1-2	1.0453	1.055	1.0599
ARL1	ADP-ribosylation factor-like protein 1;cDNA FLJ50309, highly similar to ADP-ribosylation factor-like protein 1;cDNA FLJ53084, highly similar to ADP-ribosylation factor-like protein 1	P40616;B4DWW1;Q53XB1;B4DZG7;B4DR16	1.1236	0.97299	1.0634
HNRNPUL2;HNRPUL2	Heterogeneous nuclear ribonucleoprotein U-like protein 2	Q1KMD3	0.89124	1.1844	1.0843
UBE2D3;hCG_2028213;UBCH5C;UBE2D2;UBC4;UBCH5B;PUBC1;hCG_26910	29 kDa protein;ubiquitin-conjugating enzyme E2D 3 isoform 3;Putative uncharacterized protein UBE2D3P (Fragment);ubiquitin-conjugating enzyme E2D 3 isoform 2;Ubiquitin-conjugating enzyme E2 D3;Ubiquitin-conjugating enzyme E2 D2;ubiquitin-conjugating enzyme E2D 2 isoform 2	A6NJB1;A6NJ93;Q8N924;P61077;P62837;Q3MN78;Q96RP6	1.1542	0.96302	1.0421
ENO2	Gamma-enolase;37 kDa protein	P09104;A8K3B0;Q6FHV6		1.0525
THUMPD1;DKFZp686C1054	Putative uncharacterized protein DKFZp686C1054;THUMP domain-containing protein 1	Q6MZT3;Q9NXG2;B4DFY9;O60362	1.0581	0.95926	1.1401
C1orf128;AD039;HT014;PP603	Isoform 1 of UPF0424 protein C1orf128;Isoform 2 of UPF0424 protein C1orf128;cDNA FLJ60641	Q9GZP4-1;Q9GZP4;B2R7J4;Q9GZP4-2;B4DKP7	1.1713	1.0549	0.93
VCL	Isoform 2 of Vinculin;Isoform 1 of Vinculin	P18206-1;P18206;B4E3Q9;Q5JQ13;P18206-2;B3KXA2	1.1597	1.0541	0.94214
TMEM33;DB83	Transmembrane protein 33	P57088;A6QKW0;B3KSS8	1.0076	1.1007	1.0469
PRDX6;AOP2;KIAA0106	Peroxiredoxin-6	P30041;A4UCS6;A8JZY7	1.014	1.0471	1.0931
TRAPPC3;BET3;CDABP0066;hCG_38279	Trafficking protein particle complex subunit 3;Putative uncharacterized protein TRAPPC3;Putative uncharacterized protein TRAPPC3	O43617;B2RDN2;A6NDN0;A6NKE1	1.0204	1.0004	1.1327
LSM3;MDS017	U6 snRNA-associated Sm-like protein LSm3	P62310;B2R5H5;Q6IAH0	1.0583		1.0437
SP100	Isoform Sp100-HMG of Nuclear autoantigen Sp-100;Isoform Sp100-C of Nuclear autoantigen Sp-100;Isoform Sp100-B of Nuclear autoantigen Sp-100;SP140 nuclear body protein-like;Isoform Sp100-A of Nuclear autoantigen Sp-100;Isoform SpAlt-C of Nuclear autoantigen Sp-100;Isoform 2 of Nuclear body protein SP140-like protein	P23497-1;P23497;Q53TD0;P23497-4;Q68DS7;Q6ZMK3;P23497-3;Q9H930-1;Q9H930;P23497-2;P23497-5;B4DDX5;B4E2B9;Q4ZG64;Q8TE34;Q9P0W1;Q9H930-2		1.0504	1.0515
IPO5;KPNB3;RANBP5	importin 5	O00410;B3KWG6;B4DZA0;B4E0R6;Q5T578;Q86XC7;Q9BVS9	1.0526	1.0148	1.085
DPP3	Isoform 1 of Dipeptidyl-peptidase 3	Q9NY33-1;Q9NY33;B2RDB5;B4DLX4;B4E357;Q53GT4;Q53HL4;Q5JPB8	1.0683	1.023	1.0609
DDT;DDTL	14 kDa protein;D-dopachrome decarboxylase;cDNA FLJ59607, moderately similar to D-dopachrome decarboxylase;Putative uncharacterized protein DDT;D-dopachrome decarboxylase-like protein;cDNA FLJ60602, moderately similar to D-dopachrome decarboxylase;Putative uncharacterized protein DDT	P30046;Q53Y51;B4E259;B5MCS6;A6NHG4;B4DJJ7;B4DJQ7;B5MC82	1.1347	0.95364	1.0638
	Isoform 1 of UPF0598 protein C8orf82;Isoform 2 of UPF0598 protein C8orf82;17 kDa protein	Q6P1X6-1;Q6P1X6;Q6P1X6-2		1.0507
HMGA1;HMGIY	cDNA FLJ54188, moderately similar to High mobility group protein HMG-I/HMG-Y;Isoform HMG-R of High mobility group protein HMG-I/HMG-Y;Isoform HMG-I of High mobility group protein HMG-I/HMG-Y	B4DWA0;P17096-3;P17096;P17096-1;Q5T6U9		1.5021	0.5992
PGAM1;PGAMA;CDABP0006	Uncharacterized protein ENSP00000348237;Phosphoglycerate mutase 1	A6NJ80;P18669;B4DJA4;B4DKL5;B4DMJ7;Q0D2Q6;Q53G35;Q6FHK8;Q6FHU2;Q6P6D7	0.98047	1.0649	1.1063
NDUFA5;DKFZp781K1356	NADH dehydrogenase [ubiquinone] 1 alpha subcomplex subunit 5;Putative uncharacterized protein DKFZp781K1356	Q16718;B2RD98;Q5H9R2	1.1428	1.018	0.9893
CDK4	Cell division protein kinase 4	P11802;B2R9A0;B4DNF9;Q6FG61;Q6LC83		1.1041	0.99533
PFDN5;MM1;PFD5;mm-1;hCG_23361	Prefoldin subunit 5;prefoldin subunit 5 isoform gamma;11 kDa protein;10 kDa protein	Q99471;A8K9A8;Q9C083	1.1382	0.99937	1.0102
OLA1;GTPBP9;PTD004;PRO2455	Isoform 1 of Obg-like ATPase 1;Isoform 3 of Obg-like ATPase 1;cDNA FLJ58890, highly similar to GTP-binding protein PTD004;Isoform 2 of Obg-like ATPase 1	Q9NTK5-1;Q9NTK5;Q9NTK5-3;Q53SW9;B4DK14;Q9NTK5-2;Q53SQ6	1.1091	1.0563	0.98225
SEC13;D3S1231E;SEC13L1;SEC13R	cDNA FLJ56334, highly similar to SEC13-related protein;Protein SEC13 homolog;Protein SEC13 homolog;SEC13 protein isoform 2;SEC13-like 1 isoform b variant (Fragment);Putative uncharacterized protein SEC13;28 kDa protein;30 kDa protein	B4DXJ1;Q53GB2;P55735;A8MV37;Q59FA6;A8MXL6	0.97632	1.1024	1.0688
EIF3C;EIF3S8;EIF3CL	Eukaryotic translation initiation factor 3 subunit C;Putative uncharacterized protein EIF3CL;cDNA FLJ53378, highly similar to Eukaryotic translation initiation factor 3 subunit 8;cDNA FLJ55750, highly similar to Eukaryotic translation initiation factor 3 subunit 8	Q99613;A1KYQ7;B2RXG3;B3KNZ4;B4DDN4;B4DVQ5;B4E1D5;B4E2Z6;Q3B7B9;B5ME19;B4DVU3;B4DRU0	1.0923	1.0462	1.0069
PHPT1;PHP14;CGI-202;HSPC141	14 kDa phosphohistidine phosphatase	Q9NRX4;B1AMX1;Q6FIE5	1.0769	1.026	1.0421
ARF5	ADP-ribosylation factor 5;17 kDa protein;cDNA FLJ51495, highly similar to ADP-ribosylation factor 5	P84085;A4D0Z3;B4DLJ3	0.99385	0.98258	1.1685
PITPNB	Isoform 1 of Phosphatidylinositol transfer protein beta isoform;Isoform 2 of Phosphatidylinositol transfer protein beta isoform	P48739-1;P48739;B2R7P6;P48739-2;B3KVT6;B3KYB8	1.0054	1.0218	1.1167
LGALS9;hCG_1749919	Isoform Long of Galectin-9;Isoform Short of Galectin-9;Galectin-9;cDNA FLJ52505, highly similar to Homo sapiens lectin, galactoside-binding, soluble 9, transcript variant short, mRNA	O00182-1;O00182;A7VJG6;O00182-2;B3KWW5;Q3B8N1;Q53FQ0;Q8WYQ7;B4DJD7	1.1189	1.0874	0.93712
PRKAR1A;PKR1;PRKAR1;TSE1	cAMP-dependent protein kinase type I-alpha regulatory subunit	P10644;B2R5T5;Q68DQ4	1.0386	1.0107	1.0929
NUDT2;APAH1	Bis(5'-nucleosyl)-tetraphosphatase [asymmetrical]	P50583	0.98886	0.97299	1.18
HK2	Hexokinase-2	P52789;A8K2U2;Q09LL6;Q53QX9;Q53SG7;Q68E10;Q7Z7Q6	1.1075	1.0708	0.95942
KYNU	Kynureninase	Q16719;A8K4D5;A8K7T0;B2RCZ5;Q53F63;Q53SY0;Q6I9T2	1.077	1.0166	1.0441
SORD	Sorbitol dehydrogenase	Q00796;B2R655;B4DKI2	1.1086	0.98151	1.0469
IARS2	Isoleucyl-tRNA synthetase, mitochondrial	Q9NSE4;A8K5W7;B2RPG8	1.1891	0.83573	1.1108
RBM12B	Isoform 1 of RNA-binding protein 12B;Isoform 2 of RNA-binding protein 12B	Q8IXT5-1;Q8IXT5;A8MYB5;Q8IXT5-2	1.2766	0.81347
OTUB1;OTB1;OTU1;HSPC263	cDNA FLJ56307, highly similar to Ubiquitin thioesterase protein OTUB1	Q96FW1-1;Q96FW1;B4DPD5;Q659F9	1.0031	1.0396	1.0917
PPP2CA;PPP2CB	Serine/threonine-protein phosphatase 2A catalytic subunit alpha isoform;Serine/threonine-protein phosphatase 2A catalytic subunit beta isoform;Serine/threonine protein phosphatase	P67775;B3KQ51;B3KUN1;P62714;B3KRM2;Q5U0I7;Q6FHK5;Q8WZ56;Q6I9T8	1.1582	0.97296	1.0026
TRIM21;RNF81;RO52;SSA1	52 kDa Ro protein	P19474;Q5XPV5	1.0444
CORO1A;CORO1	Coronin-1A;40 kDa protein	P31146;B2RBL1	1.023	1.1418	0.9679
ADH5;ADHX;FDH	Alcohol dehydrogenase class-3;similar to rcADH5;similar to hCG17981	P11766;Q5U043;Q6FI45;Q6IRT1;Q2VIM7	1.12	0.94553	1.0671
SUPT5H;SPT5;SPT5H	Isoform 1 of Transcription elongation factor SPT5;121 kDa protein;Isoform 2 of Transcription elongation factor SPT5	O00267-1;O00267;B4DZJ7;O00267-2;B4DJK4;B4E0Q4	1.1286	0.96715	1.0362
EIF5A;EIF5AL1;EIF5A2	Isoform 2 of Eukaryotic translation initiation factor 5A-1;Isoform 1 of Eukaryotic translation initiation factor 5A-1;Eukaryotic translation initiation factor 5A-1-like;Eukaryotic translation initiation factor 5A-2	P63241-2;P63241;P63241-1;A8K9A0;Q6IS14;Q9GZV4;B2R4V5	1.0235	1.0784	1.0297
UFD1L	Isoform Long of Ubiquitin fusion degradation protein 1 homolog;39 kDa protein;Isoform Short of Ubiquitin fusion degradation protein 1 homolog;cDNA FLJ59614, highly similar to Ubiquitin fusion degradation protein 1 homolog;ubiquitin fusion degradation 1-like isoform B;Putative uncharacterized protein UFD1L	Q92890-1;Q92890;Q92890-2;Q541A5;B4E3I3;A6NJ11;A8MW31	0.98603		1.1016
SEC23B	Protein transport protein Sec23B	Q15437;B4DJW8;B4DRA5;B4DS04;Q503A9	1.0325	1.0209	1.0775
SMEK2;KIAA1387	Isoform 1 of SMEK homolog 2;Isoform 2 of SMEK homolog 2;Isoform 3 of SMEK homolog 2	Q5MIZ7-1;Q5MIZ7;B4DKA9;Q5MIZ7-2;Q5MIZ7-3		1.0436
FKBP8;FKBP38	Isoform 2 of FK506-binding protein 8;Isoform 1 of FK506-binding protein 8	Q14318-2;Q14318;B2R8G6;Q14318-1	1.0873	0.99982
ARPC1B;ARC41	Actin-related protein 2/3 complex subunit 1B;similar to p41-Arc	O15143;A4D275	1.0672	1.0214	1.0417
ECM29;KIAA0368	KIAA0368 protein	Q5VYK3;B3KV72;B3KXF2	1.0705	1.0266	1.033
TTLL12;KIAA0153;Z82214.4-003	Tubulin--tyrosine ligase-like protein 12;Tubulin tyrosine ligase-like family, member 12	Q14166;B1AH89	1.044	1.0627	1.023
NDUFS3	NADH dehydrogenase [ubiquinone] iron-sulfur protein 3, mitochondrial	O75489;B2R9J1;B4DFM8;Q53FM7;Q9UF24	1.0447	1.1068	0.97788
CSDA;DBPA;YBX2;CSDA3;MSY2	Isoform 1 of DNA-binding protein A;Isoform 3 of DNA-binding protein A;Isoform 2 of DNA-binding protein A;CSDA protein variant (Fragment);Y-box-binding protein 2	P16989-1;P16989;B2RBW6;P16989-3;P16989-2;Q96B76;Q96GD7;Q59EB5;Q9Y2T7;B2RCC2		1.043
ROCK1	Rho-associated protein kinase 1;Rho-associated protein kinase 1	B0YJ91;Q13464;Q2KHM4;Q59GZ4		1.0846	1.0013
NUP155;KIAA0791	Isoform 1 of Nuclear pore complex protein Nup155;Isoform 2 of Nuclear pore complex protein Nup155	O75694-1;O75694;B4DLT2;O75694-2;B3KMK3	1.0978	1.0267	1.0027
RAB6A;RAB6	Isoform 1 of Ras-related protein Rab-6A;Isoform 2 of Ras-related protein Rab-6A;Rab6A variant 3	P20340-1;P20340;A8K133;Q53ET8;Q6FGX3;Q9UL29;P20340-2;Q9UL30;Q1W5D8	1.0531	1.0318	1.0421
IDH1;PICD	Isocitrate dehydrogenase [NADP] cytoplasmic	O75874;B2R5M8;B4DXS4;Q0QER2;Q567U4;Q6FHQ6;Q6FI37;Q6FIA4;Q7Z3V0	1.0976	0.99196	1.0373
NAP1L4;NAP2	cDNA FLJ59403, highly similar to Nucleosome assembly protein 1-like 4;Putative uncharacterized protein NAP1L4;20 kDa protein	Q99733;A8MZ22;B2R6J4;B4DS05;A8CGI3;A8MXH2	1.0754	1.0102	1.0388
SEC24C;KIAA0079	Protein transport protein Sec24C	P53992;B4DSN3;B4DZT4	1.0537	1.0197	1.0509
PFKM;PFKX	Isoform 1 of 6-phosphofructokinase, muscle type;cDNA FLJ44241 fis, clone THYMU3008436, highly similar to 6-phosphofructokinase, muscle type;Isoform 2 of 6-phosphofructokinase, muscle type;Phosphofructokinase	P08237-1;P08237;B4E162;Q6ZTT1;P08237-2;Q96I60;Q7KYX9	1.0169	1.0256	1.0817
TSPAN33;PEN	Tetraspanin-33	Q86UF1		1.0413
ACSL1;FACL1;FACL2;LACS;LACS1;LACS2	Isoform 1 of Long-chain-fatty-acid--CoA ligase 1;cDNA FLJ54220, highly similar to Long-chain-fatty-acid--CoA ligase 1;Isoform 2 of Long-chain-fatty-acid--CoA ligase 1	P33121-1;P33121;A8K9T3;Q108N1;B4E0R0;P33121-2	0.99023	1.0923	1.0403
APOBEC3G;MDS019	Isoform 1 of DNA dC->dU-editing enzyme APOBEC-3G;Apolipoprotein B mRNA editing enzyme catalytic polypeptide-like 3G	Q9HC16-1;Q9HC16;B2LYL6;B2RDR9;Q05JX5	1.0993	1.1483	0.87522
SPTBN1;SPTB2	276 kDa protein;Isoform Long of Spectrin beta chain, brain 1;Isoform Short of Spectrin beta chain, brain 1	Q01082-1;Q01082;B2ZZ89;B4DIF8;Q01082-2;Q53RC4	0.96601	1.1055	1.0509
RPL22	60S ribosomal protein L22;11 kDa protein	P35268;B2R495;Q7Z4W8;Q8WYP0;Q9BYF5	1.0374	1.0965	0.98646
TPD52L2;RP4-591C20.2-003;hCG_22755;RP4-591C20.2-007	tumor protein D52-like 2 isoform a;tumor protein D52-like 2 isoform c;Putative uncharacterized protein TPD52L2 (Fragment);Isoform 1 of Tumor protein D54	Q5JWU6;Q5U0E0;A6NG42;O43399-1;O43399;B4DDV4;Q53GA0;Q6FGS1	1.0549	1.012	1.0528
DAZAP1	Isoform 1 of DAZ-associated protein 1;Isoform 2 of DAZ-associated protein 1	Q96EP5-1;Q96EP5;B3KS63;Q96EP5-2	1.0277	0.91182	1.1799
ALDH4A1;ALDH4;P5CDH;RP11-128M10.1-003	Delta-1-pyrroline-5-carboxylate dehydrogenase, mitochondrial;Aldehyde dehydrogenase 4 family, member A1	P30038;B4DGE4;Q5TF55		1.0398
YWHAE	14-3-3 protein epsilon;22 kDa protein;cDNA FLJ60092, highly similar to 14-3-3 protein epsilon	P62258;B3KY71;Q4VJB6;B4DJB0	1.0604	1.0318	1.0264
	cDNA, FLJ94609	B2R9Y2;Q9P0E1	0.94302	1.1358
FAM91A1	Protein FAM91A1;Putative uncharacterized protein FAM91A1	Q658Y4;B4DUD8;A8MSR0		1.0392
SEC31A;KIAA0905;SEC31L1;HSPC275;HSPC334	Isoform 8 of Protein transport protein Sec31A;Isoform 1 of Protein transport protein Sec31A;Isoform 2 of Protein transport protein Sec31A;Isoform 4 of Protein transport protein Sec31A;Isoform 3 of Protein transport protein Sec31A;Isoform 6 of Protein transport protein Sec31A;Isoform 7 of Protein transport protein Sec31A;Isoform 5 of Protein transport protein Sec31A	O94979-8;O94979;O94979-1;O94979-2;B4DIW6;O94979-4;O94979-3;O94979-6;O94979-7;O94979-5	1.0309	0.96184	1.1231
ITGB7	Isoform Long of Integrin beta-7;Isoform Short of Integrin beta-7	P26010-1;P26010;P26010-2;Q9UCP7	1.1534	0.92371
ARHGAP1;CDC42GAP;RHOGAP1	cDNA FLJ60782, highly similar to Rho-GTPase-activating protein 1	Q07960;B4DPZ4	1.0876	1.0469	0.97976
WDR77;MEP50;HKMT1069;Nbla10071;RP11-552M11.3-004	Methylosome protein 50;WD repeat domain 77;cDNA FLJ55120, moderately similar to Methylosome protein 50	Q9BQA1;B3KMW6;Q5QNY9;B4DP38		1.1277	0.94817
CCT5;CCTE;KIAA0098	T-complex protein 1 subunit epsilon;cDNA FLJ54333, highly similar to T-complex protein 1 subunit epsilon;cDNA FLJ59103, highly similar to T-complex protein 1 subunit epsilon	P48643;A8JZY8;A8K2X8;B4DDU6;B4DE30;B4DX08;B4DYC8;B4DYD8;Q96GI1;Q9BU08;Q9HB74;B4DXI1;B4DZT5;B4DZY9	1.0474	1.0093	1.0546
TTC35;KIAA0103	Tetratricopeptide repeat protein 35	Q15006;A8K4K9;Q53HG5		1.0938	0.9803
FDPS;FPS;KIAA1293	Farnesyl pyrophosphate synthetase;farnesyl diphosphate synthase isoform b;cDNA FLJ12779 fis, clone NT2RP2001748, moderately similar to FARNESYL PYROPHOSPHATE SYNTHETASE	P14324;B3KMW3	1.0812	0.97009	1.0593
PRMT5;HRMT1L5;IBP72;JBP1;SKB1;hCG_41976	Protein arginine N-methyltransferase 5;protein arginine methyltransferase 5 isoform b;cDNA FLJ54078, highly similar to Protein arginine N-methyltransferase 5;Putative uncharacterized protein PRMT5	O14744;B2RDD7;B5BU10;A8MZ91;B4DV00;B4DX49;B4DY30;A8MTP3	1.0284	1.0608	1.0209
POLR2I	DNA-directed RNA polymerase II subunit RPB9	P36954;B2R5J2		1.0366
TUBB2A;TUBB2	Tubulin beta-2A chain	Q13885;A5D906;A5D907	1.0327	1.0405
BDH1;BDH	D-beta-hydroxybutyrate dehydrogenase, mitochondrial	Q02338;A1E284	1.1154	1.0528	0.94065
OXSR1;KIAA1101;OSR1	Serine/threonine-protein kinase OSR1	O95747	0.97028	1.0651	1.0725
RAB5C;RABL	Ras-related protein Rab-5C;19 kDa protein	P51148	1.0747	1.0073	1.0255
PDHA1;PHE1A;PDHA1/LOC79064	Mitochondrial PDHA1;Pyruvate dehydrogenase E1 component subunit alpha, somatic form, mitochondrial;PDHA1/LOC79064 protein (Fragment)	A5YVE9;Q5JPU1;Q99725;P08559;A5YPB6;B2R5P7;Q53GE3;Q53H41;Q5JPT8;A5PHJ9	0.87355	1.4213	0.81209
RRAS2;TC21;RRAS	Ras-related protein R-Ras2;Ras-related protein R-Ras;hypothetical protein;related RAS viral (r-ras) oncogene homolog 2 isoform b	P62070;B2R9Z3;P10301;Q6FH12	1.0601	1.0116	1.0344
CCT3;CCTG;TRIC5;RP11-443G18.6-002	T-complex protein 1 subunit gamma;chaperonin containing TCP1, subunit 3 isoform b;chaperonin containing TCP1, subunit 3 isoform c	P49368;B4DUR8;Q2TU64;Q59H77;B3KX11;Q5SZY0;A6NE14	1.0626	0.98135	1.0621
TRIM22;RNF94;STAF50	Isoform 1 of Tripartite motif-containing protein 22;Isoform 2 of Tripartite motif-containing protein 22;35 kDa protein;26 kDa protein	Q8IYM9-1;Q8IYM9;A8K319;B4DQA9;B4DQS5;B4DVR0;Q05CQ0;Q4A1P5;Q8IYM9-2		1.0348
CAB39L;RP11-103J18.3-002;hCG_30046	Calcium-binding protein 39-like;Calcium binding protein 39-like;Putative uncharacterized protein CAB39L	Q9H9S4;Q5TAW7;A6NI97	1.0347
PSMB8;LMP7;RING10;Y2;DAAP-57C1.3-002;DAMA-91I23.1-002;DAMC-27I8.3-002;DAQB-69D7.6-002;DASS-67H14.1-002;XXbac-BCX32M13.6-002;XXbac-BPG246D15.6-002;hCG_17507;DADB-78A10.2-004;DAAP-57C1.3-004;DAMA-91I23.1-004;DAMC-27I8.3-004;DAQB-69D7.6-004;DASS-67H14.1-004;XXbac-BCX32M13.6-004;XXbac-BPG246D15.6-004	Isoform 1 of Proteasome subunit beta type-8;proteasome beta 8 subunit isoform E2 proprotein;Isoform 2 of Proteasome subunit beta type-8;Proteasome (Prosome, macropain) subunit, beta type, 8;Proteasome (Prosome, macropain) subunit, beta type, 8	P28062-1;P28062;B0UZC0;Q5QNR8;P28062-2;Q5JNW6;Q6FHU0;B0UZC1;Q5JNW7	1.071	1.0052	1.027
STAT3;APRF	Isoform 1 of Signal transducer and activator of transcription 3;signal transducer and activator of transcription 3 isoform 3	P40763-1;P40763;A8K7B8;B4DNP0;B4DVR6;B5BTZ6;Q9BXH2		1.0341
APRT	Adenine phosphoribosyltransferase;adenine phosphoribosyltransferase isoform b	P07741	1.065	0.99358	1.0437
PPP2R1A	Serine/threonine-protein phosphatase 2A 65 kDa regulatory subunit A alpha isoform;cDNA FLJ56133, highly similar to Serine/threonine-protein phosphatase 2A 65 kDa regulatory subunit A alpha isoform;cDNA FLJ56053, highly similar to Serine/threonine-protein phosphatase 2A 65 kDa regulatory subunit A alpha isoform;cDNA FLJ34068 fis, clone FCBBF3001918, highly similar to SERINE/THREONINE PROTEIN PHOSP…	P30153;A8K3H8;A8K7B7;B4DDF7;B4DQY1;B4DE69;Q8NB89;B3KQV6	1.0456	0.99686	1.0591
APBB1IP;PREL1;RARP1;RIAM	Amyloid beta A4 precursor protein-binding family B member 1-interacting protein;cDNA FLJ61520, highly similar to Amyloid beta A4 protein-bindingfamily B member 1- interacting protein	Q7Z5R6;B4E100	1.0215	1.1168	0.96299
RBBP9;BOG;RBBP10	Isoform 1 of Retinoblastoma-binding protein 9;Isoform 2 of Retinoblastoma-binding protein 9;Similar to Retinoblastoma-binding protein 9 (RBBP-9) (Retinoblastoma-binding protein 10) (RBBP-10) (B5T overexpressed gene protein) (Bog protein). Isoform 2	O75884-1;O75884;Q5JPH9;O75884-2		1.0335
VPS13C;KIAA1421	Isoform 1 of Vacuolar protein sorting-associated protein 13C;Isoform 3 of Vacuolar protein sorting-associated protein 13C;vacuolar protein sorting 13C protein isoform 2B;408 kDa protein;vacuolar protein sorting 13C protein isoform 1B	Q709C8-1;Q709C8;Q709C8-3;B3KW10;B4E2S9;Q709C8-2;Q709C8-4;Q6ZQY1	1.0376	0.98408	1.0788
SCFD1;C14orf163;KIAA0917;STXBP1L2;FKSG23	Putative uncharacterized protein SCFD1;Sec1 family domain-containing protein 1;vesicle transport-related protein isoform b	A8K2Z5;A8MVJ7;Q53GW1;Q8WVM8;A8MU36	1.0779	0.97643	1.0461
PEBP1;PBP;PEBP	Phosphatidylethanolamine-binding protein 1;22 kDa protein;cDNA FLJ51535, highly similar to Phosphatidylethanolamine-binding protein 1	P30086;B2R4S1;B4DRT4	1.0516	0.99829	1.0501
CCT6A;CCT6;CCTZ	T-complex protein 1 subunit zeta;chaperonin containing TCP1, subunit 6A isoform b	P40227;A1JUI8;B2R9K8;B4DPJ8;Q59ET3;A6NCD2;B4DN39	1.0582	1.0312	1.0096
IFI44L;C1orf29	Interferon-induced protein 44-like;26 kDa protein	Q53G44;B2R5Q5;B4DDY4;B4E019		1.0326
GLO1	Lactoylglutathione lyase	Q04760;B2R6P7;B4DDV0;Q59EL0	0.9943	1.0521	1.0494
EFTUD2;KIAA0031;SNRP116	116 kDa U5 small nuclear ribonucleoprotein component;cDNA FLJ44205 fis, clone THYMU3001379, highly similar to 116 kDa U5 small nuclear ribonucleoprotein component	Q15029;A8KAP3;B3KX19;B4DK30;B4DMC0;B4DZB1;Q6IBM8;Q8IXJ3;B3KWY2	1.0333	1.1018	0.95948
SRP14	Signal recognition particle 14 kDa protein;8 kDa protein	P37108;B5BUF5;Q96Q14	1.0165	1.0561	1.0217
TMEM126B;HT007	Isoform 1 of Transmembrane protein 126B;Isoform 2 of Transmembrane protein 126B;Isoform 5 of Transmembrane protein 126B;Isoform 4 of Transmembrane protein 126B;Isoform 3 of Transmembrane protein 126B;HT026	Q8IUX1-1;Q8IUX1;B4DP48;Q8IUX1-2;Q8IUX1-5;A8K535;Q8IUX1-4;Q8IUX1-3;Q9H2Q3		1.031
DCPS;DCS1;HINT5;HSPC015	Scavenger mRNA-decapping enzyme DcpS	Q96C86;Q53G42	1.0914	0.86951	1.132
IDH3B	Isocitrate dehydrogenase 3, beta subunit isoform a precursor;Isoform A of Isocitrate dehydrogenase [NAD] subunit beta, mitochondrial	O43837-1;O43837;B2RDR1;O43837-2	1.043	1.0226	1.0265
EIF3I;EIF3S2;TRIP1	Eukaryotic translation initiation factor 3 subunit I	Q13347;Q53HU7;Q5U0F4;Q9P1D9	1.0781	0.97191	1.0408
IAH1;hCG_1685787	Isoamyl acetate-hydrolyzing esterase 1 homolog;IAH1 protein (Fragment);cDNA FLJ60023	Q2TAA2;Q05D21;Q6PCA9;B4DMV3;Q6NVV8		1.0218	1.0379
HRPAP20;C6orf66;HSPC125;My013	Protein HRPAP20	Q9P032;B2R4J5	1.2592	0.90883	0.92043
RNF213;C17orf27;KIAA1554	Isoform 1 of RING finger protein 213	Q63HN8-1;Q63HN8	1.034	1.0245
RABGAP1L;HHL;KIAA0471;RP1-102G20.1-004	Isoform 3 of RAB GTPase-activating protein 1-like;Putative uncharacterized protein RABGAP1L;Isoform 1 of RAB GTPase-activating protein 1-like;Isoform 4 of RAB GTPase-activating protein 1-like;Isoform 2 of RAB GTPase-activating protein 1-like;RAB GTPase activating protein 1-like	Q5R372-3;Q5R372;B5MC30;Q5R372-1;Q5R372-4;Q5R372-2;Q5JZA9	1.2014	0.9212	0.9644
RALY;hCG_37136;HNRPCL2;P542;RP1-64K7.1-007;RP1-64K7.1-004;RP1-64K7.1-003	RNA binding protein, autoantigenic (HnRNP-associated with lethal yellow homolog (Mouse)), isoform CRA_a (Fragment);Isoform 2 of RNA-binding protein Raly;Isoform 1 of RNA-binding protein Raly;RNA binding protein, autoantigenic;RNA binding protein, autoantigenic;RNA binding protein, autoantigenic	Q53GL6;Q9UKM9-1;Q9UKM9;Q9UKM9-2;A8K4T9;Q5QPL9;B4DSJ1;Q5QPM1;Q5QPM2	0.89704	1.1494	1.0402
TUFM	Tu translation elongation factor, mitochondrial precursor	P49411	1.0332	1.056	0.99703
ARPC5;ARC16;RP1-127C7.3-004	Isoform 1 of Actin-related protein 2/3 complex subunit 5;Isoform 2 of Actin-related protein 2/3 complex subunit 5;Actin-related protein 2/3 complex subunit 5	O15511-1;O15511;O15511-2;B1ALC0	1.0431	0.98174	1.0613
CPT2;CPT1	Carnitine O-palmitoyltransferase 2, mitochondrial	P23786;B2R6S0;Q53G79	0.96423	1.0919
EZR;VIL2	Ezrin;69 kDa protein;Ezrin	P15311;B2R6J2;Q6NUR7;Q9UJZ2;Q9UJZ6;Q9UJZ7;Q9UJZ8;Q9UK20	0.97171	1.1717	0.94027
GPX1	glutathione peroxidase 1 isoform 1	P07203;Q6NSD4	0.96361	1.0475	1.0723
EIF2B1;EIF2BA	Translation initiation factor eIF-2B subunit alpha;cDNA FLJ60506, highly similar to Translation initiation factor eIF-2B subunit alpha;21 kDa protein	Q14232;B4DGX0	0.99106	1.0793	1.0124
TRNT1;CGI-47	Isoform 1 of tRNA-nucleotidyltransferase 1, mitochondrial;Isoform 2 of tRNA-nucleotidyltransferase 1, mitochondrial	Q96Q11-1;Q96Q11;A8K2Z6;Q96Q11-2	1.0768		0.97833
TPM1;C15orf13;TMSA;DKFZp586K2222;hCG_33495	Isoform 1 of Tropomyosin alpha-1 chain;Isoform 4 of Tropomyosin alpha-1 chain;Sarcomeric tropomyosin kappa;Isoform 3 of Tropomyosin alpha-1 chain;tropomyosin 1 alpha chain isoform 2;tropomyosin 1 alpha chain isoform 3;Tropomyosin 1 alpha variant 6;tropomyosin 1 alpha chain isoform 7;Tropomyosin isoform;Isoform 2 of Tropomyosin alpha-1 chain	P09493-1;P09493;Q6DV89;P09493-4;Q8TCG4;Q6DV90;P09493-3;Q9Y427;Q6ZN40;P09493-5;Q07413;Q1ZYL5;Q59GR8;Q7Z6L8;Q15657;P09493-2	1.0295	1.101	0.94984
GBP1	Interferon-induced guanylate-binding protein 1;Guanylate binding protein 1, interferon-inducible, 67kD variant (Fragment)	P32455;B4E1L5;Q5D1D5;Q59H47	1.0516	1.0782	0.95049
FAM62A;ESYT1;KIAA0747;MBC2	Isoform 2 of Extended synaptotagmin-1;Isoform 1 of Extended synaptotagmin-1;cDNA FLJ46898 fis, clone UTERU3022168, highly similar to Protein FAM62A	Q9BSJ8-2;Q9BSJ8;B3KMV5;Q9BSJ8-1;B3KY56	1.0437	0.93844	1.098
SUCLG1	succinate-CoA ligase, GDP-forming, alpha subunit;Succinyl-CoA ligase [GDP-forming] subunit alpha, mitochondrial	A8K4W7;B2R8A1;P53597;Q6IAL5		1.0392	1.0141
PPP1R14B;PLCB3N;PNG;LIMK2;hCG_2010534	Protein phosphatase 1 regulatory subunit 14B;LIM domain kinase 2 isoform 1;Putative uncharacterized protein LIMK2	Q96C90;Q7L3H5;B5MC51	1.0102	0.9723	1.097
PFDN1;PFD1	Prefoldin subunit 1	O60925;B2RD02	1.1212	0.93135
PCK2;PEPCK2	mitochondrial phosphoenolpyruvate carboxykinase 2 isoform 1 precursor;Phosphoenolpyruvate carboxykinase [GTP], mitochondrial	B4DW73;Q6IB91;Q16822	1.138	1.0407	0.90012
OSBP;OSBP1	Isoform 1 of Oxysterol-binding protein 1	P22059-1;P22059;B4DR25		1.0259
EPB41L2;DKFZp781H1755	Band 4.1-like protein 2;Putative uncharacterized protein DKFZp781H1755;erythrocyte membrane protein band 4.1-like 2 isoform b	O43491;Q6R5J7;Q68DV2;B4DHI8;Q59FD8;Q8N4C4	1.0713	0.9704	1.0355
NAE1;APPBP1;HPP1	Putative uncharacterized protein NAE1;NEDD8-activating enzyme E1 regulatory subunit;NEDD8 activating enzyme E1 subunit 1 isoform b;NEDD8 activating enzyme E1 subunit 1 isoform c	A6NCK0;B3KUP9;Q13564;B2R700;A6NFN4;A8MU28	1.0255	0.93564	1.1158
ESD	S-formylglutathione hydrolase;28 kDa protein;Protein	P10768	0.99592	1.0457	1.0325
BAT3;G3;DADB-70P7.10-002;DAMA-236L13.16-002;DAMC-157M7.11-002;hCG_2005629;DADB-70P7.10-003;DAMA-236L13.16-003;DAMC-157M7.11-003;XXbac-BPG296P20.4-014;XXbac-BPG296P20.4-010;DAMA-236L13.16-004;DAMA-236L13.16-005	Isoform 3 of Large proline-rich protein BAT3;HLA-B associated transcript 3;Isoform 1 of Large proline-rich protein BAT3;HLA-B associated transcript 3;Isoform 2 of Large proline-rich protein BAT3;114 kDa protein;HLA-B associated transcript 3;cDNA FLJ60983, highly similar to Large proline-rich protein BAT3;HLA-B associated transcript 3;HLA-B associated transcript 3	P46379-3;P46379;B0UX84;P46379-1;B0UX83;B4E3V4;P46379-2;A2AB52;A2AB53;A2ADK5;A6PWG5;B0UX91;B0UX92;B0UZ40;B0UZ41;B0UZM7;B0UZM8;B1B0J8;B1B0J9;Q5SQ40;Q5STC0;A2AB51;A2AB56;A2ADJ9;A2ADK2;A6PWF8;A6PWG3;A6PWT8;A6PWU1;B0UX88;B0UX89;B0UZ37;B0UZ38;B0UZM4;B0UZM5;B1B0J5;B1B0J6;B4DZ12;B0UX85;B0UZ59;B0UZE0;B0UZM1;B0UX86;B0UZ60;B0UZE1;B0UZM2;B1B0J3;Q5SQ39;Q5SRP7;Q5STB9	1.1323	0.93518	1.0066
GSTO1;GSTTLP28;RP11-99N20.1-004	Glutathione S-transferase omega-1;Glutathione S-transferase omega 1	P78417;B2R983;Q5TA02	0.9965	1.0223	1.0552
STIM1;GOK	Stromal interaction molecule 1	Q13586	0.8038	1.2455
COMMD5;HT002	COMM domain-containing protein 5;hypothetical protein	Q9GZQ3		1.0246
ARHGDIA;GDIA1	Rho GDP-dissociation inhibitor 1;28 kDa protein;26 kDa protein;Uncharacterized protein ENSP00000383556;22 kDa protein;cDNA FLJ50748, highly similar to Rho GDP-dissociation inhibitor 1;cDNA FLJ53102, moderately similar to Rho GDP-dissociation inhibitor 1;9 kDa protein	P52565;B2R5X1;Q6IBM5;A8MXW0;B4DDD3;B4DUV9	0.99884	1.0182	1.0563
TNPO2	transportin 2 (importin 3, karyopherin beta 2b) isoform 3;Isoform 1 of Transportin-2;Isoform 2 of Transportin-2;cDNA FLJ31621 fis, clone NT2RI2003205, highly similar to Transportin-2	Q05D48;Q6IN77;O14787-1;O14787;O14787-2;B4DRY5;Q4LE60;B3KPC8	1.1289	1.1212	0.82302
TTC1;TPR1	Tetratricopeptide repeat protein 1	Q99614;B2RCT2;Q53GE7;Q53HD9	1.0625	1.0469	0.96369
PPA2;HSPC124	Isoform 2 of Inorganic pyrophosphatase 2, mitochondrial;Isoform 1 of Inorganic pyrophosphatase 2, mitochondrial;inorganic pyrophosphatase 2 isoform 5 precursor;Isoform 3 of Inorganic pyrophosphatase 2, mitochondrial;cDNA FLJ59863, highly similar to Inorganic pyrophosphatase 2, mitochondrial	Q9H2U2-2;Q9H2U2;Q9H2U2-1;B4DR66;Q4W5E9;Q96HR1;Q9H2U2-3;A8K0P2;B4DFH3	1.0391	0.99528	1.0377
NUP160;KIAA0197;NUP120	nucleoporin 160kDa;Isoform 1 of Nuclear pore complex protein Nup160	Q12769-2;Q12769;B4E2J9;Q08AD3;Q7Z5X6;Q12769-1	1.0218	1.0392	1.0108
STX8	Syntaxin-8;16 kDa protein;14 kDa protein	Q9UNK0;Q53XT8	1.1673	0.97969	0.92465
ACAT2;ACTL	Acetyl-CoA acetyltransferase, cytosolic	Q9BWD1;A8K4W5;Q59GW6	1.0843	0.96148	1.0257
IMPA1;IMPA	Inositol monophosphatase;cDNA FLJ58981, highly similar to Inositol monophosphatase	P29218;B2R733;B4DLN3	1.0442	1.0192	1.0077
ENSA;RP11-54A4.10-004;DKFZp779B2258;RP11-54A4.10-006;hCG_1998376;RP11-54A4.10-005;RP11-54A4.10-008;RP11-54A4.10-007;ARPP19	Endosulfine alpha;19 kDa protein;Putative uncharacterized protein DKFZp779B2258;endosulfine alpha isoform 1;endosulfine alpha isoform 2;endosulfine alpha isoform 5;Isoform 1 of Alpha-endosulfine;Isoform 2 of Alpha-endosulfine;endosulfine alpha isoform 6;endosulfine alpha isoform 7;14 kDa protein;Isoform ARPP-19 of cAMP-regulated phosphoprotein 19;hypothetical protein LOC643896;Isoform ARPP-16 of …	Q5T5H1;Q68D48;Q6VUC9;A6NMQ3;Q6VUC7;O43768-1;O43768;Q6FHW0;Q6IAM4;Q6NUL2;Q6VUC8;O43768-2;Q6VUD0;Q6VUC6;A8K1Z9;Q5T5H2;P56211-1;P56211;B2R497;P56211-2	0.86724	1.1797
DCXR	L-xylulose reductase;26 kDa protein;26 kDa protein	Q7Z4W1		1.1101	0.93677
ISG15;G1P2;UCRP	Interferon-induced 17 kDa protein	P05161;Q5SVA4	0.99683	1.0154	1.0576
AP1M1;CLTNM	adaptor-related protein complex 1, mu 1 subunit isoform 1;AP-1 complex subunit mu-1;cDNA FLJ58317, highly similar to Adaptor-relatedprotein complex 1 mu-1 subunit	B3KNH5;Q4TTY5;Q59EK3;Q9BXS5;B4DDG7;B4DN99	1.0851	0.97766	1.0068
PARF;C9orf86;RP11-216L13.9-008;RP11-216L13.9-001	Isoform 1 of Putative GTP-binding protein Parf;54 kDa protein;Isoform 2 of Putative GTP-binding protein Parf;Isoform 3 of Putative GTP-binding protein Parf;Isoform 4 of Putative GTP-binding protein Parf;Chromosome 9 open reading frame 86;Isoform 5 of Putative GTP-binding protein Parf;Chromosome 9 open reading frame 86	Q3YEC7-1;Q3YEC7;A8QVZ7;B3KSV0;B3KXX7;Q9NW45;Q9NWD6;Q3YEC7-2;Q3YEC7-3;A8QVZ8;Q3YEC7-4;B1AMX4;Q3YEC7-5;B1AMX3	1.088	0.95818
GPSM3;AGS4;C6orf9;G18;hCG_2001537	G-protein-signaling modulator 3;G18	Q9Y4H4;A2BFJ3;P78548	0.96189	1.0826	1.0244
TBC1D15;hCG_25175	Isoform 1 of TBC1 domain family member 15;Isoform 2 of TBC1 domain family member 15;cDNA FLJ58591, highly similar to TBC1 domain family member 15;TBC1 domain family, member 15, isoform CRA_d	Q8TC07-1;Q8TC07;Q8TC07-2;B4DMT9;A8K8E1;Q9NSR4		1.1859	0.8599
CCT8;CCTQ;KIAA0002	T-complex protein 1 subunit theta;59 kDa protein	P50990;B4DEM7;B4DQH4;Q53HU0;Q7Z759	1.0625	0.96559	1.0388
PGPEP1;PGPI;hCG_37051	Pyroglutamyl-peptidase 1;Pyroglutamyl-peptidase I, isoform CRA_c	Q9NXJ5;Q8IVT1		1.0221
DCUN1D1;DCUN1L1;RP42;SCCRO	DCN1-like protein 1;cDNA FLJ57531, highly similar to DCN1-like protein 1;23 kDa protein	Q96GG9;B2RB37;B4DM76		1.0972	0.94527
KIF5B;KNS;KNS1	Kinesin-1 heavy chain	P33176;A8K048;Q2TA90;Q66K46;Q6P164	1.0887	1.002	0.97245
RAB31;RAB22B	RAB31, member RAS oncogene family;17 kDa protein	Q13636;B2RBT7;Q53EY4		1.021
ACLY	ATP-citrate synthase	P53396	1.0466	1.008	1.008
RPS6KA1;RSK1	ribosomal protein S6 kinase, 90kDa, polypeptide 1 isoform b;Ribosomal protein S6 kinase alpha-1;Putative uncharacterized protein RPS6KA1	A6NGG4;A8K9K7;Q15418;B2RDY8;B5MCJ0	0.9418	1.0089	1.1094
MICAL1;MICAL;NICAL;FLJ00407	Isoform 1 of NEDD9-interacting protein with calponin homology and LIM domains;Isoform 2 of NEDD9-interacting protein with calponin homology and LIM domains;FLJ00407 protein (Fragment)	Q8TDZ2-1;Q8TDZ2;Q8TDZ2-2;Q5TED7;Q6ZMJ8	0.87568	1.0107	1.1725
CAT	Catalase	P04040;B4DWK8;Q8TAK2	1.0829	0.95554
PAFAH1B2;PAFAHB	Platelet-activating factor acetylhydrolase IB subunit beta;Intracellular platelet-activating factor acetylhydrolase alpha 2 subunit variant 3	P68402;A8DPS5;A8DPS6;Q6IBR6;A8DPS7	1.018	1.0543	0.98406
C12orf10;MST024	UPF0160 protein MYG1;cDNA FLJ57902, highly similar to Protein MYG1;MSTP024;23 kDa protein	Q9HB07;Q86UA3;B4DE37;Q96CT6;Q8WYI2	1.059	0.97279	1.0245
PPM1A;PPPM1A	protein phosphatase 1A isoform 3;Isoform Alpha-1 of Protein phosphatase 1A;Isoform Alpha-2 of Protein phosphatase 1A	B2R8E4;B5BUD5;P35813-1;P35813;B5BU11;P35813-2;Q5JB49	1.0746	1.0032	0.97781
SET;RP11-216B9.3-010	Isoform 1 of Protein SET;Putative uncharacterized protein SET;SET translocation;similar to template acyivating factor-I alpha	Q01105-1;Q01105;B2REB7;Q5VXV3;A6NGV1;B2REB8	1.0089	1.0155	1.0303
ZFR	Zinc finger RNA binding protein;Putative uncharacterized protein ZFR	Q96KR1;A8K849;B2RNR5;B2RNR6;B3KP82;B3KVS4;B5MEH6		1.0182
HUWE1;KIAA0312;KIAA1578;UREB1;HSPC272;RP3-339A18.4-002	482 kDa protein;Isoform 1 of E3 ubiquitin-protein ligase HUWE1;Isoform 3 of E3 ubiquitin-protein ligase HUWE1;Isoform 2 of E3 ubiquitin-protein ligase HUWE1;HECT, UBA and WWE domain containing 1	Q7Z6Z7-1;Q7Z6Z7;B4DGF6;Q7Z6Z7-3;Q7Z6Z7-2;Q5H924	1.0221	0.9674	1.0637
PSCD1;D17S811E	Isoform 1 of Cytohesin-1;Isoform 2 of Cytohesin-1;22 kDa protein;19 kDa protein	Q15438-1;Q15438;A8MWB4;B4DLA7;Q15438-2			1.0176
LSM4	U6 snRNA-associated Sm-like protein LSm4	Q9Y4Z0	1.0962	0.94644	1.0101
RAB35;RAB1C;RAY	Ras-related protein Rab-35	Q15286;B2R6E0;B4E390	1.047	0.99582	1.0091
NDUFC2;HLC1	NADH dehydrogenase [ubiquinone] 1 subunit C2	O95298;Q549M5;Q6FIH8	1.4571	0.46212	1.1319
PSMB10;MECL1	Proteasome subunit beta type-10	P40306;B2R5J4;Q6IB22	0.99055	1.0453	1.0149
SIPA1;SPA1	Signal-induced proliferation-associated protein 1;cDNA FLJ60386, moderately similar to Signal-induced proliferation-associated protein 1	Q96FS4;B4E0W3	0.91031	1.1226
PCMT1	Isoform 2 of Protein-L-isoaspartate(D-aspartate) O-methyltransferase;Isoform 1 of Protein-L-isoaspartate(D-aspartate) O-methyltransferase	P22061-2;P22061;P22061-1;A8K109	1.056	0.96757	1.0255
SNRPD3	19 kDa protein;Small nuclear ribonucleoprotein Sm D3;cDNA FLJ51872, highly similar to Small nuclear ribonucleoprotein Sm D3;7 kDa protein	P62318;B5BU13;B4DJP7	1.0399	1.0054	1.0028
GLRX3;PICOT;TXNL2;HUSSY-22	Glutaredoxin-3	O76003;B3KMP7;B3KMQ5	1.062	1.0219	0.96285
KIF2C;KNSL6;RP11-269F19.1-004;KIF2B	Isoform 1 of Kinesin-like protein KIF2C;Kinesin family member 2C;Isoform 2 of Kinesin-like protein KIF2C;Kinesin-like protein KIF2B;cDNA FLJ53902, highly similar to Homo sapiens kinesin family member 2B (KIF2B), mRNA	Q99661-1;Q99661;A8K3S3;B3ITR9;Q6ICU1;Q5JR89;Q99661-2;Q5JR88;Q8N5N1;Q8N4N8;B4DY48		1.0153
RAP1A;KREV1	Ras-related protein Rap-1A;RAP1A, member of RAS oncogene family	P62834;A8KAH9;Q5U0C3	1.0601	0.93717	1.0484
PRPF6;C20orf14	Pre-mRNA-processing factor 6	O94906;B2RAR5;B3KMC6	1.0417	0.96454	1.0391
HNRNPD;AUF1;HNRPD	Isoform 1 of Heterogeneous nuclear ribonucleoprotein D0;Isoform 3 of Heterogeneous nuclear ribonucleoprotein D0;Isoform 2 of Heterogeneous nuclear ribonucleoprotein D0;Isoform 4 of Heterogeneous nuclear ribonucleoprotein D0;P37 AUF1	Q14103-1;Q14103;Q14103-3;Q14103-2;A8K9J2;B4DTC3;B4E0W4;Q14103-4;Q9UCE8;Q12771	0.97386	1.0529	1.017
DYNC1H1;DHC1;DNCH1;DNCL;DNECL;DYHC;KIAA0325	Cytoplasmic dynein 1 heavy chain 1	Q14204;B0I1R0;B4DSR6	1.0089	1.079	0.95566
APOA1BP;AIBP;RP11-284F21.3-004	cDNA FLJ56357, highly similar to Homo sapiens apolipoprotein A-I binding protein (APOA1BP), mRNA;Isoform 2 of Apolipoprotein A-I-binding protein;Apolipoprotein A-I binding protein	Q8NCW5-1;Q8NCW5;B4DP80;Q8NCW5-2;B4DGY3;Q5T3I4	1.0177	0.99455	1.0307
CHCHD4;MIA40	Isoform 2 of Mitochondrial intermembrane space import and assembly protein 40;Isoform 1 of Mitochondrial intermembrane space import and assembly protein 40	Q8N4Q1-2;Q8N4Q1;Q8N4Q1-1;A8K3Z9	1.0192	0.91243	1.1108
CCT2;99D8.1;CCTB	T-complex protein 1 subunit beta	P78371;A8K402;B5BTY7;Q9H369	1.0436	0.97996	1.0188
ISG20;HEM45	Isoform 1 of Interferon-stimulated gene 20 kDa protein	Q96AZ6-1;Q96AZ6	0.91734	1.0047	1.1198
COPA	Isoform 2 of Coatomer subunit alpha;Isoform 1 of Coatomer subunit alpha	P53621-2;P53621;P53621-1	0.99084	1.0128	1.0379
TPRKB;CGI-121;My019	Isoform 3 of TP53RK-binding protein;Isoform 1 of TP53RK-binding protein;CGI-121;Isoform 2 of TP53RK-binding protein;cDNA FLJ59202, moderately similar to Homo sapiens CGI-121 protein (CGI-121), mRNA	Q9Y3C4-3;Q9Y3C4;Q9Y3C4-1;A8K4V6;A9UK02;Q9Y3C4-2;B4DHS0		0.98157	1.0458
PGM2;MSTP006	Phosphoglucomutase-2	Q96G03;B4DN40;B4E0G8;Q4W5D6	1.0311	1.0151	0.99305
MAPK1;ERK2;PRKM1;PRKM2	Mitogen-activated protein kinase 1;Extracellular signal-regulated kinase-2 splice variant	P28482;B4DHN0;Q1HBJ4;Q499G7;A8CZ64	1.0202	1.0328	0.98479
NUDT3;DIPP;DIPP1	Diphosphoinositol polyphosphate phosphohydrolase 1	O95989;B2R8N4	1.03	1.03	0.97779
HLA-F;DASS-38I7.12-003;DADB-68M4.2-003;DAMA-364L23.3-003;DAQB-335A13.17-003;XXbac-BCX231I11.4-003;XXbac-BPG170G13.20-006;XXbac-BPG170G13.20-003;hCG_25628;HLA-5.4;HLAF;XXbac-BPG170G13.20-001;XXbac-BCX231I11.4-006;DAQB-335A13.17-006	Major histocompatibility complex class I F;Major histocompatibility complex, class I, F;cDNA FLJ53112, highly similar to HLA class I histocompatibility antigen, alpha chain F;cDNA FLJ60056, highly similar to HLA class I histocompatibility antigen, alpha chain F;major histocompatibility complex, class I, F isoform 1 precursor;cDNA FLJ60325, highly similar to HLA class I histocompatibility antigen,…	B1AZU4;Q5SPT7;A2AAS3;B4DYG3;B3KUD8;B4DT81;Q861E9;Q861F0;Q5JQI8;Q95HC0;P30511;B4DQ99;Q54A71;Q6DU20;Q6DU28;A8MVU7;Q8MGQ1;A2ACE9;B1AZU5;A2AQM6;B0S899;B0UYZ4;Q7YP62;A8MV00;Q6ZUW0			1.0124
ASCC3L1;HELIC2;KIAA0788	Isoform 1 of U5 small nuclear ribonucleoprotein 200 kDa helicase;hypothetical protein, partial	O75643-1;O75643;A2RRQ7;A4FU77;B4E0P5;B4E150;Q5ZF01;Q7L5W4;Q9H8B9;Q9P172;Q9UNV9	0.97773	1.0609	0.99751
UBE2M;UBC12	NEDD8-conjugating enzyme Ubc12	P61081	1.0534	0.98621	0.99623
C14orf129;HSPC210	UPF0279 protein C14orf129	Q9P0R6;B3KSZ0	1.0701	1.067	0.89852
PTK2B;FAK2;PYK2;RAFTK	Isoform 2 of Protein tyrosine kinase 2 beta;Isoform 1 of Protein tyrosine kinase 2 beta	Q14289-2;Q14289;Q14289-1;Q59GM4;Q6PID4	1.0336	0.9892	1.0127
NCAPD3;CAPD3;KIAA0056	Condensin-2 complex subunit D3	P42695;Q96FA6		1.0118
WDR1	Isoform 1 of WD repeat-containing protein 1;Putative uncharacterized protein WDR1;Isoform 2 of WD repeat-containing protein 1;cDNA FLJ45763 fis, clone N1ESE2000698, highly similar to WD repeat protein 1	O75083-1;O75083;A8K6E9;A8MVA9;Q53H17;A8MPU4;Q53GN4;Q59ER5;O75083-2;O75083-3;B3KXN4;B4DY05	1.017	0.99803	1.02
IQGAP2	Isoform 1 of Ras GTPase-activating-like protein IQGAP2;cDNA FLJ76812, highly similar to Homo sapiens IQ motif containing GTPase activating protein 2 (IQGAP2), mRNA;180 kDa protein	Q13576-1;Q13576;Q59HA3;Q13576-2;A8K4V1	1.0546	0.82142	1.1589
LSM8	U6 snRNA-associated Sm-like protein LSm8	O95777;A4D0W0;Q86XF3	1.0779	0.93868	1.0183
UBE2J1;NCUBE1;CGI-76;HSPC153;HSPC205	Ubiquitin-conjugating enzyme E2 J1	Q9Y385;A8K3F9;B4DUF8;Q53F25	1.0316		0.99056
TXNL1;TRP32;TXL;TXNL	cDNA, FLJ94230, highly similar to Homo sapiens thioredoxin-like 1 (TXNL1), mRNA;Thioredoxin-like protein 1	B2R960;O43396;B3KT45;Q59G46	1.0063	1.0031	1.0235
NIF3L1;ALS2CR1;MDS015;My018	Isoform 1 of NIF3-like protein 1;Isoform 2 of NIF3-like protein 1;NIF3L1 isoform beta;NIF3L1 isoform gamma	Q9GZT8-1;Q9GZT8;Q9GZT8-2;Q658J0;Q6X735;Q6X734		1.002	1.0199
VPS4B;SKD1;VPS42	Vacuolar protein sorting-associating protein 4B	O75351;A8K4G7;A8K5D8;Q69HW4	1.0234	0.97109	1.0372
ACLY variant protein	cDNA FLJ56442, highly similar to ATP-citrate synthase	B4DIM0;B4E3P0;Q4LE36;Q8N9C4	1.0104
HAGH;GLO2;HAGH1	hydroxyacyl glutathione hydrolase isoform 1;Hydroxyacylglutathione hydrolase	A8K290;B4DRA7;B4DT01;Q16775	1.0103
TNFAIP8	Isoform 1 of Tumor necrosis factor, alpha-induced protein 8;Isoform 2 of Tumor necrosis factor, alpha-induced protein 8;Isoform 3 of Tumor necrosis factor, alpha-induced protein 8	O95379-1;O95379;B3KMH1;B3KUI2;O95379-2;O95379-3;B3KMI2	1.0747	1.0164	0.93875
ALDH16A1	Isoform 1 of Aldehyde dehydrogenase family 16 member A1;cDNA FLJ60673, highly similar to Homo sapiens aldehyde dehydrogenase 16 family, member A1 (ALDH16A1), mRNA	Q8IZ83-1;Q8IZ83;B4DQ15;B4DVV1;B4DLQ1	1.1692	0.92606	0.93435
PRKAG1	cDNA FLJ40287 fis, clone TESTI2027909, highly similar to 5'-AMP-ACTIVATED PROTEIN KINASE, GAMMA-1 SUBUNIT;5'-AMP-activated protein kinase subunit gamma-1;AMP-activated protein kinase, noncatalytic gamma-1 subunit isoform 2	Q8N7V9;P54619;B4DDT7;B4E094	0.95716	1.0187	1.0535
RBM25;RNPC7	RNA binding motif protein 25	P49756;A0PJL9;B2RNA8;B3KT03;Q16083;Q2TA72;Q5XJ17;Q6P665;Q9H6A1	0.96555	1.0281	1.0357
ADA	45 kDa protein;Adenosine deaminase	P00813	1.0894	0.91379	1.0259
PWP2;PWP2H	Periodic tryptophan protein 2 homolog	Q15269;B2RAG8		1.0096
LYPLA2;RP5-886K2.5-010;RP5-886K2.5-008;RP5-886K2.5-005;RP5-886K2.5-007;RP5-886K2.5-004	Acyl-protein thioesterase 2;Lysophospholipase II;Lysophospholipase II;Lysophospholipase II;Lysophospholipase II;Lysophospholipase II	O95372;Q5QPQ0;Q5QPQ2;Q5QPQ3;Q5QPQ1;Q5QPN9	0.97465	1.0326	1.0202
THOP1	Thimet oligopeptidase;cDNA FLJ56247, highly similar to Thimet oligopeptidase	P52888;Q96CV8;B4DU96;Q9BW75	1.0113	0.97397	1.0421
LASP1;MLN50	Isoform 1 of LIM and SH3 domain protein 1;Isoform 2 of LIM and SH3 domain protein 1;cDNA FLJ51834, highly similar to LIM and SH3 domain protein 1;19 kDa protein	Q14847-1;Q14847;A8K1D2;Q14847-2;B4DGQ0	1.1198	0.89807	1.008
CSTF2;CSTF2T;KIAA0689	BetaCstF-64 variant 2;Isoform 1 of Cleavage stimulation factor 64 kDa subunit;Isoform 2 of Cleavage stimulation factor 64 kDa subunit;cDNA FLJ58787, highly similar to Cleavage stimulation factor 64 kDa subunit;Cleavage stimulation factor 64 kDa subunit, tau variant	B3V096;P33240-1;P33240;P33240-2;B4DUD5;Q9H0L4;B2RAR9	0.87501	1.1416
PXMP2;PMP22	Peroxisomal membrane protein 2;similar to 22kDa peroxisomal membrane protein-like;18 kDa protein	Q9NR77		1.0081
PPIL1;CYPL1;CGI-124;UNQ2425/PRO4984	Peptidyl-prolyl cis-trans isomerase-like 1	Q9Y3C6;Q5TDC9	1.023	1.0656	0.93569
FBL;FIB1;FLRN	rRNA 2'-O-methyltransferase fibrillarin	P22087;B4DLD4;B5BUE8;Q96BS4	0.94054	1.0359	1.0468
SAFB;HAP;HET;SAFB1	Scaffold attachment factor B;Scaffold attachment factor B1	A0AV56;Q15424;A8K329;Q68DW3	0.87763	1.09	1.0547
UBLCP1	Ubiquitin-like domain-containing CTD phosphatase 1	Q8WVY7	1.0518	0.9755	0.99502
ENOPH1;MASA;MSTP145	Isoform 1 of Enolase-phosphatase E1;MasA;Isoform 2 of Enolase-phosphatase E1	Q9UHY7-1;Q9UHY7;Q7Z508;Q9UHY7-2	0.95071	1.053	1.0185
LTA4H;LTA4	Isoform 1 of Leukotriene A-4 hydrolase;Isoform 2 of Leukotriene A-4 hydrolase;cDNA FLJ51009, highly similar to Leukotriene A-4 hydrolase	P09960-1;P09960;B4DVZ8;Q6IAT6;P09960-2;B4DNQ9	0.95462	1.0198	1.047
KIAA1033	Isoform 1 of Uncharacterized protein KIAA1033	Q2M389-1;Q2M389	1.0392	0.97507
NDUFA3	Putative uncharacterized protein NDUFA3 (Fragment);NADH dehydrogenase [ubiquinone] 1 alpha subcomplex subunit 3	A8MXT3;O95167;Q6FGG4			1.0068
TXNDC17;TXNL5	Thioredoxin domain-containing protein 17;11 kDa protein;9 kDa protein	Q9BRA2;A8K7E8	1.0523	0.96878	0.99877
NHLRC2	Isoform 1 of NHL repeat-containing protein 2;Isoform 2 of NHL repeat-containing protein 2	Q8NBF2-1;Q8NBF2;Q7Z658;Q8NBF2-2		1.0066
HDHD1A;DXF68S1E;FAM16AX;GS1	haloacid dehalogenase-like hydrolase domain containing 1A isoform a;haloacid dehalogenase-like hydrolase domain containing 1A isoform b	Q08623;B2R7X6	0.9635	0.96595	1.0901
UBE2H;hCG_18056;tcag7.352	Ubiquitin-conjugating enzyme E2 H;ubiquitin-conjugating enzyme E2H isoform 2	P62256;A4D1L5;A4D1L6;Q75MF5;Q7Z6F4	1.1086	0.96481	0.94577
AKR7A2;AFAR;AFAR1;AKR7	Aflatoxin B1 aldehyde reductase member 2	O43488	1.1036	0.93884	0.97673
SKP1;EMC19;OCP2;SKP1A;TCEB1L	Isoform 1 of S-phase kinase-associated protein 1;Isoform 2 of S-phase kinase-associated protein 1;similar to S-phase kinase-associated protein 1A	P63208-1;P63208;P63208-2	1.013	1.0006	1.0048
HIBADH	3-hydroxyisobutyrate dehydrogenase, mitochondrial;55 kDa protein	P31937;Q546Z2		1.0061
SSB	Lupus La protein	P05455;B5BUB5;Q14730;Q15367;Q2F832;Q53XJ4;Q9UMH5;Q9UMH6;Q9UMH7	0.99464	0.98955	1.0333
LDHAL6B;LDHAL6;LDHL	L-lactate dehydrogenase A-like 6B;Similar to Lactate dehydrogenase A-like protein	Q9BYZ2	0.99101	0.92772	1.0987
NUP133	Nuclear pore complex protein Nup133;Putative uncharacterized protein NUP133	Q8WUM0;B2RAZ8;B4E206;B4E3T7;A6NGS4;Q5T8N1	1.0087	1.0006	1.0079
ABHD14B;CIB	Isoform 1 of Abhydrolase domain-containing protein 14B;cDNA FLJ52710, highly similar to Abhydrolase domain-containing protein 14B;Putative uncharacterized protein ABHD14B;cDNA FLJ52723, highly similar to Abhydrolase domain-containing protein 14B	Q96IU4-1;Q96IU4;B4DNR3;A6NGU1;B4DQI4	1.0196	0.94159	1.056
UBE2I;LA16c-358B7.1-006;UBC9;UBCE9	Ubiquitin carrier protein;SUMO-conjugating enzyme UBC9	B0QYN7;Q7KZS0;P63279;A8K503	0.98458	1.0506	0.98195
ARFGEF2;ARFGEP2;BIG2	Brefeldin A-inhibited guanine nucleotide-exchange protein 2	Q9Y6D5;B3KMT7;B4DYN7;Q59FR3;Q86TH5		1.0054
TIMM44;MIMT44;TIM44	Mitochondrial import inner membrane translocase subunit TIM44	O43615;A8K0R9;Q53G69;Q6AI07;Q9UPE4	1.2152	0.92173	0.87924
NUMA1;NUMA;NUMA1 variant protein	Isoform 1 of Nuclear mitotic apparatus protein 1;NUMA1 variant protein;Isoform 2 of Nuclear mitotic apparatus protein 1	Q14980-1;Q14980;Q9UNL7;Q4LE64;Q14980-2;A8K394;Q3SYK8;Q59HB8;Q7Z757;Q96HN5;Q9UPG3	1.0482	0.91259	1.0553
CARHSP1	Calcium-regulated heat stable protein 1	Q9Y2V2;B2R4C3	0.93775	1.0075	1.0708
RAC2;RP1-151B14.8-007;hCG_1811995;RP1-151B14.8-004;RP1-151B14.8-003	Ras-related C3 botulinum toxin substrate 2;Ras-related C3 botulinum toxin substrate 2;Ras-related C3 botulinum toxin substrate 2;Ras-related C3 botulinum toxin substrate 2	P15153;B1AH80;B1AH77;B1AH78	0.99489	0.98689	1.0339
PRRC1	Isoform 2 of Protein PPRC1;Isoform 3 of Protein PPRC1;Isoform 1 of Protein PPRC1;Putative uncharacterized protein PRRC1 (Fragment);Isoform 5 of Protein PPRC1;Isoform 4 of Protein PPRC1	Q96M27-2;Q96M27;Q96M27-3;Q96M27-1;B5MEG3;Q96M27-5;Q96M27-4	1.0229	0.92922	1.0632
UPF1;KIAA0221;RENT1	Isoform 1 of Regulator of nonsense transcripts 1;Isoform 2 of Regulator of nonsense transcripts 1	Q92900-1;Q92900;Q92900-2;B3KY55;O60385	1.0083	0.99371	1.0133
ACP1	Isoform 1 of Low molecular weight phosphotyrosine protein phosphatase;Isoform 2 of Low molecular weight phosphotyrosine protein phosphatase;Isoform 3 of Low molecular weight phosphotyrosine protein phosphatase;acid phosphatase 1, soluble isoform d;9 kDa protein	P24666-1;P24666;Q3KQX8;Q59EH3;P24666-2;A8K1L9;P24666-3;B5MCC7	1.0464	0.96202	1.0067
DHRS1	Dehydrogenase/reductase SDR family member 1	Q96LJ7		0.9508	1.0589
GAPDH;GAPD;CDABP0047;OK/SW-cl.12	Glyceraldehyde-3-phosphate dehydrogenase;39 kDa protein;32 kDa protein;Glyceraldehyde 3-phosphate dehydrogenase;Glyceraldehyde-3-phosphate dehydrogenase;cDNA FLJ58855, highly similar to Glyceraldehyde-3-phosphate dehydrogenase;18 kDa protein	P04406;Q2TSD0;Q53X65;A4UCT1;Q16768;Q5ZEY3;Q0QET7;B4DRV9	0.99344	0.9909	1.0299
SNF8;EAP30	Isoform 1 of Vacuolar-sorting protein SNF8;Isoform 2 of Vacuolar-sorting protein SNF8;16 kDa protein	Q96H20-1;Q96H20;Q96H20-2		1.0047
OPA1;KIAA0567	optic atrophy 1 isoform 8;118 kDa protein;Isoform 3 of Dynamin-like 120 kDa protein, mitochondrial;Isoform 2 of Dynamin-like 120 kDa protein, mitochondrial;Isoform 5 of Dynamin-like 120 kDa protein, mitochondrial;optic atrophy 1 isoform 6;optic atrophy 1 isoform 5;Isoform 7 of Dynamin-like 120 kDa protein, mitochondrial;Isoform 1 of Dynamin-like 120 kDa protein, mitochondrial;Isoform 8 of Dynamin…	O60313-6;O60313;O60313-3;O60313-2;O60313-5;O60313-4;O60313-7;O60313-1;O60313-8;Q6PEK6	1.0308	1.0568	0.92608
IWS1;IWS1L	Isoform 1 of Protein IWS1 homolog;cDNA FLJ54017, highly similar to IWS1 homolog;cDNA FLJ53983, highly similar to IWS1 homolog;Isoform 3 of Protein IWS1 homolog;Isoform 2 of Protein IWS1 homolog	Q96ST2-1;Q96ST2;B4DJ84;B4DL52;B4DGM5;Q96ST2-3;Q96ST2-2		1.004
NDUFA8	NADH dehydrogenase [ubiquinone] 1 alpha subcomplex subunit 8	P51970;B1AM93	1.0395	0.94249	1.03
RAD23A	UV excision repair protein RAD23 homolog A	P54725;A8K1J3;B4DDJ7;Q59EU8;Q5M7Z1		1.0036
DNAJA1;DNAJ2;HDJ2;HSJ2;HSPF4	DnaJ homolog subfamily A member 1;HDJ2 protein (Fragment)	P31689;Q5T7Q0;Q86TL9;Q9NXZ8	1.0077	1.0607	0.94196
SF3A1;SAP114	Splicing factor 3 subunit 1;splicing factor 3a, subunit 1, 120kDa isoform 2	Q15459;B4E091	0.91969	1.1049	0.98521
HNRNPH1;HNRPH;HNRPH1	51 kDa protein;Heterogeneous nuclear ribonucleoprotein H	P31943;B3KW86;B4DP00;Q68DG4	0.94791	1.1081	0.95251
	Ribosomal protein L1	A8MXH3		1.0028
CAPNS1;CAPN4;CAPNS	Calpain small subunit 1	P04632;A8K0P1	0.99609	1.0048	1.0069
MARS	Methionyl-tRNA synthetase, cytoplasmic;cDNA FLJ53309, highly similar to Methionyl-tRNA synthetase;cDNA FLJ55046, highly similar to Methionyl-tRNA synthetase	P56192;A8K492;B3KVK7;B4DF61;B4E0E9	1.0475	0.97729	0.98256
EPRS;GLNS;PARS;QARS;QPRS;PIG32	Bifunctional aminoacyl-tRNA synthetase;cDNA FLJ56021, highly similar to Bifunctional aminoacyl-tRNA synthetase[Includes: Glutamyl-tRNA synthetase (Fragment)	P07814;B4DP50;Q3KQZ8;B4DKX5	1.0161	0.9318	1.0583
UNC45A;SMAP1	Isoform 1 of Protein unc-45 homolog A;Isoform 2 of Protein unc-45 homolog A	Q9H3U1-1;Q9H3U1;Q9H3U1-2;A8K6F7	0.98728	1.0813	0.93751
DPH5;AD-018;CGI-30;HSPC143;NPD015	Isoform 5 of Diphthine synthase;Isoform 1 of Diphthine synthase;Isoform 4 of Diphthine synthase;diphthine synthase isoform b;Isoform 2 of Diphthine synthase;Isoform 3 of Diphthine synthase	Q9H2P9-5;Q9H2P9;Q9H2P9-1;B3KWP1;Q9H2P9-4;A8JZY6;Q9H2P9-2;Q96DC6;Q9H2P9-3	0.83432	1.1386	1.0324
CAPN1;CANPL1	Calpain-1 catalytic subunit;cDNA FLJ53224, highly similar to Calpain-1 catalytic subunit	P07384;B2RDI5;Q2TTR0;Q6DHV4;B4DWH5	0.99762	1.0272	0.98048
TBL3	transducin beta-like 3;83 kDa protein;TBL3 protein	Q59GD6;Q8IVB7;Q96A78;A0JLS5		1.0014
TCEB2	elongin B isoform b;Transcription elongation factor B polypeptide 2	Q15370	1.0415	0.94206	1.0205
ZCCHC6;KIAA1711	Isoform 1 of Zinc finger CCHC domain-containing protein 6;Isoform 6 of Zinc finger CCHC domain-containing protein 6;Isoform 4 of Zinc finger CCHC domain-containing protein 6;Isoform 2 of Zinc finger CCHC domain-containing protein 6;Isoform 3 of Zinc finger CCHC domain-containing protein 6;Isoform 5 of Zinc finger CCHC domain-containing protein 6	Q5VYS8-1;Q5VYS8;Q5VYS8-6;Q5VYS8-4;Q5VYS8-2;Q5VYS8-3;Q5VYS9;Q5VYS8-5		1.0013
PFKL;DKFZp686L2097	Isoform 1 of 6-phosphofructokinase, liver type;6-phosphofructokinase, liver type (EC 2.7.1.11) (Phosphofructokinase 1) (Phosphohexokinase) (Phosphofructo-1-kinase isozyme B) (PFK-B). Isoform 2;cDNA FLJ30173 fis, clone BRACE2000969, highly similar to 6-phosphofructokinase, liver type	P17858-1;P17858;P17858-2;B3KNQ7;B4E108;Q59GI2;Q6MZK4;Q7L2M7;Q7Z3R9;Q9BSP4	0.95106	1.0109	1.0411
CCT4;CCTD;SRB	T-complex protein 1 subunit delta;Putative uncharacterized protein CCT4;T-complex protein 1, delta subunit	P50991;B2R6I3;B5MCQ1;A8K3C3	1.0306	0.98263	0.98923
HNRNPH2;FTP3;HNRPH2	Heterogeneous nuclear ribonucleoprotein H2;cDNA FLJ57964, highly similar to Heterogeneous nuclear ribonucleoprotein H'	P55795;A1L400;B4DFK9	0.96692	1.0554	0.97911
SRRM2;KIAA0324;SRL300;SRM300;HSPC075	Isoform 1 of Serine/arginine repetitive matrix protein 2;Isoform 2 of Serine/arginine repetitive matrix protein 2	Q9UQ35-1;Q9UQ35;A0AUK8;O60382;Q9UQ35-2;Q05BI2;Q05CV9;Q9UQ39	1.0838	0.89409	1.0235
PTMS	15 kDa protein;Parathymosin	P20962		1.0004
TNPO1;KPNB2;MIP1;TRN	transportin 1 isoform 1;Transportin-1;cDNA FLJ58732, highly similar to Transportin-1	Q92973;B4DVC6	1.034	0.97537	0.9915
AK2;ADK2	Isoform 1 of Adenylate kinase isoenzyme 2, mitochondrial;Isoform 2 of Adenylate kinase isoenzyme 2, mitochondrial;Isoform 3 of Adenylate kinase isoenzyme 2, mitochondrial;Isoform 4 of Adenylate kinase isoenzyme 2, mitochondrial	P54819-1;P54819;A8K6L1;B4DHH7;P54819-2;B4DL64;Q5EB54;P54819-3;B4DLK2;P54819-4	0.99417	0.99732	1.0073
AP1B1;ADTB1;BAM22;CLAPB2	Isoform A of AP-1 complex subunit beta-1;Isoform B of AP-1 complex subunit beta-1;AP1B1 protein;65 kDa protein	Q10567-1;Q10567;B4DG47;B4DS79;Q10567-2;B4DKH5;Q20WL3;Q86X54	0.98688	0.97275	1.039
HSD17B12	Estradiol 17-beta-dehydrogenase 12	Q53GQ0;A8K9B0;B3KQJ0;B4DWS6	1.0065	1.0608	0.93104
UCHL3;RP11-173B14.3-003	Ubiquitin carboxyl-terminal hydrolase isozyme L3;Ubiquitin carboxyl-terminal esterase L3	P15374;B2R970;Q5TBK7	1.0153	1.0221	0.95949
JMJD1B;C5orf7;JHDM2B;KIAA1082	Isoform 1 of JmjC domain-containing histone demethylation protein 2B	Q7LBC6-1;Q7LBC6;A4FUT8;A6H8X7		0.9989
YWHAQ	14-3-3 protein theta;Putative uncharacterized protein YWHAQ	P27348;B4DMT8;B4DY04;Q53S41;Q53RR5	1.0044	0.98422	1.0073
TBR1	T-box brain protein 1	Q16650;B0AZS4;B2R6G5;Q56A81			0.9986
APOOL;CXorf33;FAM121A;UNQ8193/PRO23204	Apolipoprotein O-like	Q6UXV4;Q68DW4		0.9986
PDLIM1;CLIM1;CLP36	PDZ and LIM domain protein 1	O00151;B2RBS6	1.0067	0.97358	1.0153
CSTF3	Cleavage stimulation factor 77 kDa subunit	Q12996;A8K471;B4DFQ5;B4DMA4	0.87029	1.1266
GOLGA7;GCP16;HDCKB03P;HSPC041	Golgin subfamily A member 7	Q7Z5G4		0.92797	1.0687
PKN1;PKN;PRK1;PRKCL1	protein kinase N1 isoform 1;Serine/threonine-protein kinase N1	A8K7W5;B2R9R4;B3KVN3;Q16512;Q15523;Q504U4;Q9UD44	1.0473	1.0095	0.93734
MTA1	79 kDa protein;Full-length cDNA 5-PRIME end of clone CS0DK005YC03 of HeLa cells of Homo sapiens;Isoform Long of Metastasis-associated protein MTA1;Isoform Short of Metastasis-associated protein MTA1;MTA1 protein	Q86SW2;Q13330-1;Q13330;A5PLK4;Q13330-2;Q86TR6;Q59FW1;Q9BRL8		0.99801
COPB1;COPB;MSTP026	Coatomer subunit beta	P53618	0.99189	1.0058	0.99605
AP3B1;ADTB3A	Isoform 1 of AP-3 complex subunit beta-1;cDNA FLJ51426, highly similar to Adapter-related protein complex 3 beta-1 subunit	O00203-1;O00203;A8K586;Q3MNE1;O00203-2;B4E0B2	0.98861	1.0113	0.99382
RPL35;LOC154880;tcag7.829	60S ribosomal protein L35;Similar to 60S ribosomal protein L35;similar to ribosomal protein L35;similar to ribosomal protein L35;similar to ribosomal protein L35;similar to ribosomal protein L35;11 kDa protein	P42766;A8K4V7;A4D2M5	1.0094	1.0177	0.96639
RAB8A;MEL;RAB8	Ras-related protein Rab-8A;cDNA FLJ53028, highly similar to Ras-related protein Rab-8A	P61006;B4DEK7	0.99758	0.98228	1.0136
ATG3;APG3;APG3L	Isoform 1 of Autophagy-related protein 3;Isoform 2 of Autophagy-related protein 3	Q9NT62-1;Q9NT62;Q9NT62-2		1.0104	0.98513
EXOC3;SEC6;SEC6L1;DKFZp762K123	Isoform 1 of Exocyst complex component 3;Sec6 protein;Isoform 2 of Exocyst complex component 3	O60645-1;O60645;B2RE06;Q69YP2;Q6P2E8;Q6ZNJ2;O60645-2		0.99762
CBR1;CBR;CRN;hCG_401084	Carbonyl reductase [NADPH] 1;Putative uncharacterized protein CBR1;cDNA FLJ60474, highly similar to Carbonyl reductase	P16152;B2RBZ7;A8MTM1;B4DFK7	0.95994	1.0138	1.0171
CPNE1;RP1-309K20.2-005;hCG_38213;CPN1;RP1-309K20.2-032	copine I isoform b;Copine-1;Copine I;47 kDa protein	B0QZ18;Q99829;Q59EI4;A6PVH9	1.0415	0.95669	0.99207
GBE1	1,4-alpha-glucan-branching enzyme	Q04446;B3KWV3;B4DNJ3;B4DUF1;Q59ET0	1.021	0.95356	1.0153
TUBB4;TUBB5	Tubulin beta-4 chain;cDNA FLJ53341, highly similar to Tubulin beta-4 chain;cDNA FLJ52536, highly similar to Tubulin beta-4 chain	P04350;B3KQP4;B4DE77;B4DJ43;B4DFH6	0.99449	1.0721	0.92321
CDV3;H41	Isoform 1 of Protein CDV3 homolog;carnitine deficiency-associated gene expressed in ventricle 3 isoform c;Isoform 2 of Protein CDV3 homolog	Q9UKY7-1;Q9UKY7;B3KUC2;Q9UKY7-2	0.86125	1.0616	1.0666
DAK	Dihydroxyacetone kinase	Q3LXA3;Q2L9C1;Q9UFX5		0.95402	1.0388
IMPDH2;IMPD2	Inosine-5'-monophosphate dehydrogenase 2	P12268	1.0372	0.93061	1.0203
AP2M1;CLAPM1;KIAA0109	cDNA FLJ53069, highly similar to AP-2 complex subunit mu-1;Isoform 1 of AP-2 complex subunit mu-1;Isoform 2 of AP-2 complex subunit mu-1;32 kDa protein	B4DNB9;Q96CW1-1;Q96CW1;B4DFM1;B4DJB1;B4DTI4;Q96CW1-2;B4E304	1.04	0.9469	1.0012
SF3B1;SAP155	Splicing factor 3B subunit 1	O75533;A0JLT9;A0PJH5;A8K355;Q32Q20;Q7Z497;Q9NTB4	0.94563	1.0133	1.0287
TEX10;L18;Nbla10363	Testis-expressed sequence 10 protein;cDNA FLJ54377	Q9NXF1;B4DYV2;B4E149;B4DQR0		0.95992	1.0317
MFF;C2orf33;AD030;AD033;GL004	Isoform 1 of Mitochondrial fission factor;Isoform 2 of Mitochondrial fission factor;Isoform 3 of Mitochondrial fission factor;Isoform 5 of Mitochondrial fission factor;Isoform 4 of Mitochondrial fission factor	Q9GZY8-1;Q9GZY8;Q9GZY8-2;Q9GZY8-3;Q9GZY8-5;Q9GZY8-4		0.99567
ASNA1;ARSA	Arsenical pump-driving ATPase;cDNA FLJ60230, highly similar to Arsenical pump-driving ATPase	O43681;B4DEE5	1.0783		0.91268
ARPC2;ARC34;PRO2446	Actin-related protein 2/3 complex subunit 2;PNAS-139	O15144;Q53R19;Q9BXV5	0.97237	1.0301	0.98385
RDH11;ARSDR1;PSDR1;CGI-82	Isoform 1 of Retinol dehydrogenase 11;Isoform 2 of Retinol dehydrogenase 11;cDNA FLJ53708, highly similar to Retinol dehydrogenase 11	Q8TC12-1;Q8TC12;B2RB26;B3KQ19;Q0QD40;Q8TC12-2;A8K062;B4DDW0	0.98146	1.0133	0.99132
SLTM;MET	Isoform 1 of SAFB-like transcription modulator;modulator of estrogen induced transcription isoform b;70 kDa protein;68 kDa protein	Q9NWH9-1;Q9NWH9;B2RTX3;A8K5V8	0.85755	1.1323
EIF5	Eukaryotic translation initiation factor 5	P55010;Q05DF3;Q32Q19;Q53XB3;Q6IBU0	1.0845	0.97751	0.92231
EXOSC8;OIP2;RRP43;DKFZp564C0482	Exosome complex exonuclease RRP43;Putative uncharacterized protein DKFZp564C0482	Q96B26;Q5JXM0		0.99474
NRAS;HRAS1	GTPase NRas	P01111;Q5U091	1.0539	0.97157	0.95802
TSTA3	GDP-L-fucose synthetase;cDNA FLJ57685, highly similar to GDP-L-fucose synthetase;cDNA FLJ39433 fis, clone PROST2004142, highly similar to GDP-L-fucose synthetase	Q13630;B2R8Y7;B4DZW9;B3KU96		1.0337	0.95523
SNAPIN;SNAP25BP;SNAPAP	SNARE-associated protein Snapin	O95295;Q5SXU8	0.99445
PPA1;IOPPP;PP;RP11-367H5.1-004	Inorganic pyrophosphatase;Pyrophosphatase (Inorganic) 1	Q15181;Q5SQT6	0.94428	1.0281	1.0103
POLR2A	DNA-directed RNA polymerase II subunit RPB1	P24928;A6NN93;B4DET1;B4E3V7;Q6NX41	1.0355	1.0556	0.89149
MARCKS;MACS;PRKCSL	Myristoylated alanine-rich C-kinase substrate	P29966;Q05C82;Q6NVI1		0.96386	1.0245
RANGAP1;KIAA1835;SD	Ran GTPase-activating protein 1	P46060;B4DY16;B4E0U0;Q8WUS7;Q9BSK3	1.0653	1.0388	0.87745
SNRPE;SNRPEL1	Small nuclear ribonucleoprotein E;Putative small nuclear ribonucleoprotein polypeptide E-like protein 1;similar to hCG23490;Putative uncharacterized protein SNRPEL1	P62304;B2R5B9;Q5VYJ4;A6NHK2	1.0282	0.94202	1.0104
PREP;PEP	Prolyl endopeptidase	P48147;B2RAH7;Q9UM02		0.96616	1.0202
CHMP4A;C14orf123;SHAX2;CDA04;HSPC134	chromatin modifying protein 4A	Q9BY43;Q14D22	0.86089	1.1099	1.0084
LDHA;PIG19	Isoform 1 of L-lactate dehydrogenase A chain;cDNA FLJ52549, highly similar to L-lactate dehydrogenase A chain;L-lactate dehydrogenase A isoform 2;Isoform 2 of L-lactate dehydrogenase A chain;L-lactate dehydrogenase	P00338-1;P00338;B4DJI1;B4DKQ2;P00338-2;A8MXQ4;Q9UDE9	0.94813	0.9286	1.101
NIPSNAP1	Protein NipSnap homolog 1;Protein	Q9BPW8;A8K4I8;B2RAY3;B4DQI7	1.0419	0.95753	0.97807
LSP1;WP34;pp52	cDNA FLJ34752 fis, clone NESOP2000452, highly similar to Lymphocyte-specific protein 1;38 kDa protein;Lymphocyte-specific protein 1;31 kDa protein;lymphocyte-specific protein 1 isoform 2;Pp52 protein;20 kDa protein;14 kDa protein	B3KRR6;P33241;A8K2L4;A8K7L8;B3KPP1;Q53H48;Q6FHM3;Q9UEV8;Q16002;Q9UEV7	0.92527	0.96432	1.0878
CIB1;CIB;KIP;PRKDCIP	Calcium and integrin-binding protein 1	Q99828;B5BU40	0.94455	0.86504	1.1672
YKT6	Synaptobrevin homolog YKT6;cDNA FLJ50174, highly similar to Homo sapiens SNARE protein Ykt6 (YKT6), mRNA	O15498;A4D2J0;B5BU81;Q9UES0;B4DR94	0.99358	0.98857	0.99319
SNRPD1	16 kDa protein;Small nuclear ribonucleoprotein Sm D1	P62314;B5BTZ1;Q7Z5A3	1.0616	0.98544	0.92787
USP14;TGT	Ubiquitin carboxyl-terminal hydrolase (Fragment);Ubiquitin carboxyl-terminal hydrolase 14;ubiquitin specific protease 14 isoform b;cDNA, FLJ96494, highly similar to Homo sapiens ubiquitin specific peptidase 14 (tRNA-guanine transglycosylase) (USP14), mRNA	A8MYA5;P54578;Q53XY5;A6NJA2;B3KTG4;B2RD79	1.0297	0.94015	1.0048
CRKL	Crk-like protein	P46109;A8KA44	1.042	0.92009	1.0107
HIST1H1B;H1F5	Histone H1.5	P16401		1.0787	0.90295
GPSN2;SC2	Isoform 1 of Synaptic glycoprotein SC2;cDNA FLJ36768 fis, clone ADIPS1000064, highly similar to Synaptic glycoprotein SC2	Q9NZ01-1;Q9NZ01;B2RD55;B3KM97;B3KSQ1	1.0545	0.99851	0.91859
USP24;KIAA1057	Ubiquitin carboxyl-terminal hydrolase 24;Similar to Ubiquitin carboxyl-terminal hydrolase 24	Q9UPU5		0.99051
CLPP	Putative ATP-dependent Clp protease proteolytic subunit, mitochondrial	Q16740;A4UCS4;B2R4W5	1.016	1.0154	0.93998
BRCC3;C6.1A;CXorf53;RP11-143H17.2-007	Putative uncharacterized protein BRCC3;Putative uncharacterized protein BRCC3;Isoform 1 of BRCA1/BRCA2-containing complex subunit 3;BRCA1/BRCA2-containing complex, subunit 3	P46736-1;P46736;A8MUX5;B4DQN7;Q53YX5;A8MWH0;A9Z1Y0;P46736-2;B1B062;A6QRF9		0.97449	1.0056
TWF2;PTK9L;MSTP011	Twinfilin-2	Q6IBS0	0.89322	1.1017	0.97492
ACOT2;PTE2;PTE2A;ACOT1;CTE1	Isoform 1 of Acyl-coenzyme A thioesterase 2, mitochondrial;Acyl-coenzyme A thioesterase 1;Isoform 2 of Acyl-coenzyme A thioesterase 2, mitochondrial	P49753-1;P49753;A1L172;Q53EK4;Q86TX2;A1L173;B3KSA0;B4DV16;P49753-2		0.98991
ALDH3A2;ALDH10;FALDH	Isoform 2 of Fatty aldehyde dehydrogenase;Isoform 1 of Fatty aldehyde dehydrogenase	P51648-2;P51648;P51648-1;Q59H65;Q68D64;Q6I9T3	0.90278	1.0748	0.99118
TAGLN2;KIAA0120;CDABP0035	24 kDa protein;Transgelin-2;21 kDa protein	P37802;Q6FGI1	1.0084	1.0153	0.94416
RILPL2;RLP2	RILP-like protein 2	Q969X0		1.0149	0.96334
SEMA4D;CD100;SEMAJ	Semaphorin-4D;cDNA FLJ56938, highly similar to Semaphorin-4D	Q92854;Q4LE41;B4DER0	0.97472	1.0035
UTP18;WDR50;CDABP0061;CGI-48	U3 small nucleolar RNA-associated protein 18 homolog	Q9Y5J1;B2RAX6		0.98896
KCNAB2;KCNA2B;KCNK2;RP1-233K16.1-007	cDNA FLJ16180 fis, clone BRHIP3000240, highly similar to Homo sapiens potassium channel beta 2 subunit (HKvbeta2.2) mRNA;Isoform 1 of Voltage-gated potassium channel subunit beta-2;Isoform 2 of Voltage-gated potassium channel subunit beta-2;KCNAB2 protein;Potassium voltage-gated channel, shaker-related subfamily, beta member 2	Q6ZNE4;Q13303-1;Q13303;A8K1A4;A8K1X9;B0AZM0;B2R615;Q13303-2;B0AZR7;B2R776;Q6FG22;Q6FG44;Q2YD85;Q5TG80	0.90867	1.1236	0.93404
ATIC;PURH;OK/SW-cl.86	Bifunctional purine biosynthesis protein PURH	P31939;A8K202;B2R7P8;B4DP06;Q53S28	0.98525	0.97841	1.0023
TRAPPC1;BET5;MUM2	Trafficking protein particle complex subunit 1;12 kDa protein	Q9Y5R8;B2RA50	1.0498	0.89839	1.0177
STAT5B	Signal transducer and activator of transcription 5B	P51692;Q59H39;Q8WW55	0.98425	0.97583	1.0053
HCLS1;HS1	Hematopoietic lineage cell-specific protein;cDNA FLJ59379, highly similar to Hematopoietic lineage cell-specific protein	P14317;Q53Y93;Q6IBK9;B4DQ92;B4DTP2	0.93665	1.0247	1.0029
COPS3;CSN3	COP9 signalosome complex subunit 3;36 kDa protein	Q9UNS2;B2R683;B4DN01;B4DY81	1.0997	0.93911	0.92542
UXT;HSPC024;RP1-212G6.2-003	ubiquitously-expressed transcript isoform 1;Protein UXT;Ubiquitously-expressed transcript	Q9UBK9;B2R561;B1AJQ0		0.98798
DR1	Protein Dr1	Q01658;Q53F47;Q658N3		0.98788
PTP4A2;PRL2;PTPCAAX2;BM-008;PTP4A1;PRL1;PTPCAAX1;RP5-1148A21.2-001	Isoform 1 of Protein tyrosine phosphatase type IVA 2;Protein tyrosine phosphatase type IVA 1;cDNA FLJ57530, highly similar to Protein tyrosine phosphatase type IVA protein 2;Protein tyrosine phosphatase type IVA, member 1	Q12974-1;Q12974;A8K9I8;Q93096;B2R6C8;B5BU78;B4DM39;Q5TCM7	0.94034	1.0567	0.96622
DNAJC11;RP1-126A5.3-009;RP1-126A5.3-003	Isoform 1 of DnaJ homolog subfamily C member 11;Isoform 2 of DnaJ homolog subfamily C member 11;Isoform 3 of DnaJ homolog subfamily C member 11;DnaJ (Hsp40) homolog, subfamily C, member 11;Putative uncharacterized protein	Q9NVH1-1;Q9NVH1;B4DGD5;B4DPK2;Q9NVH1-2;Q9NVH1-3;B3KTC6;B1AK20;Q5TH61;Q9UMU8	1.1296		0.84589
EHD1;PAST;PAST1;CDABP0131	EH domain-containing protein 1;cDNA FLJ55166, highly similar to EH-domain-containing protein 1;35 kDa protein	Q9H4M9;B2R5U3;B4DMV9;B4DR44;B4DTR4;B4DZH9	0.95096	1.0091	1.0031
CAB39;MO25;CGI-66	Calcium-binding protein 39	Q9Y376;A8K8L7;Q53RN7;Q7Z4X0	1.0797	0.98556	0.89683
NCF1C;SH3PXD1C;NCF1;NOXO2;SH3PXD1A;NCF1B;SH3PXD1B	Putative neutrophil cytosol factor 1C;Isoform 1 of Neutrophil cytosol factor 1;Putative neutrophil cytosol factor 1B;neutrophil cytosolic factor 1;cDNA, FLJ79451, highly similar to Neutrophil cytosol factor 1;Isoform 2 of Neutrophil cytosol factor 1	A8MVU1;P14598-1;P14598;A6NI72;Q53FR5;B4DQ63;B4DQC4;B4DW70;B4E3W8;P14598-2	0.9606	1.0556	0.94497
MAPK14;CSBP;CSBP1;CSBP2;CSPB1;MXI2	Isoform CSBP2 of Mitogen-activated protein kinase 14;Isoform CSBP1 of Mitogen-activated protein kinase 14;Isoform Exip of Mitogen-activated protein kinase 14;Isoform Mxi2 of Mitogen-activated protein kinase 14	Q16539-1;Q16539;B4E0K5;Q16539-2;Q16539-4;Q16539-3;B5TY32;B5TY33;Q15454	1.0026	1.0482	0.90885
ACTR3;ARP3	Actin-related protein 3	P61158;B4DT29;B4DTI0;B4DXW1;Q53QM2;Q59FV6	1.0205	1.0008	0.93784
TRIM25;EFP;RNF147;ZNF147	Tripartite motif-containing protein 25	Q14258;Q59GW5	0.90029	0.96238	1.0949
MOBKL2A;MOB3A	Mps one binder kinase activator-like 2A	Q96BX8;B3KTF1	0.97924	0.96624	1.0112
CUGBP2;BRUNOL3;CELF2;ETR3;NAPOR	CUG triplet repeat, RNA binding protein 2 isoform 2;Isoform 3 of CUG-BP- and ETR-3-like factor 2;Isoform 1 of CUG-BP- and ETR-3-like factor 2;Isoform 2 of CUG-BP- and ETR-3-like factor 2;Isoform 5 of CUG-BP- and ETR-3-like factor 2;cDNA FLJ50653, highly similar to Rattus norvegicus CUG triplet repeat, RNA binding protein 2	O95319-4;O95319;B2RA86;B4DS31;O95319-3;O95319-1;B4DDE7;Q5VZZ6;O95319-2;A8MQ42;B4DIB6;O95319-5;B4DM66;B4DT00;B4DZ01;B4DSZ2	1.0033	1.074	0.87911
NUP54	Nucleoporin 54kDa variant (Fragment);Isoform 2 of Nucleoporin p54	Q7Z3B4-1;Q7Z3B4;B2RCK7;B4DRV5;B4DT35;Q53FD7;Q53H29;Q7Z3B4-2		0.98523
ARS2;ASR2	Isoform 1 of Arsenite-resistance protein 2;Isoform 3 of Arsenite-resistance protein 2;Isoform 2 of Arsenite-resistance protein 2;Isoform 4 of Arsenite-resistance protein 2	Q9BXP5-1;Q9BXP5;Q6NT74;Q9BXP5-3;A4D2E6;B4DJL4;B4DZA6;Q8TDQ5;Q9BXP5-2;Q9BXP5-4	0.99476	1.0389	0.92167
UBE2A;RAD6A;hCG_23186	Ubiquitin-conjugating enzyme E2 A;ubiquitin-conjugating enzyme E2A isoform 2;ubiquitin-conjugating enzyme E2A isoform 3	P49459;B2R7R9;B4DWT6;Q53G67;Q53G86;Q8WXB3;A6NGR2;A6NFE9	1.0738	0.8964
KPNB1;NTF97	Importin subunit beta-1	Q14974;B2RBR9;Q53XN2	0.9975	0.97707	0.98057
PIK3R1;GRB1	Isoform 4 of Phosphatidylinositol 3-kinase regulatory subunit alpha;Isoform 1 of Phosphatidylinositol 3-kinase regulatory subunit alpha;Isoform 2 of Phosphatidylinositol 3-kinase regulatory subunit alpha;Isoform 3 of Phosphatidylinositol 3-kinase regulatory subunit alpha	P27986-4;P27986;P27986-1;P27986-2;P27986-3;B3KT19;B3KWZ7	1.0319	1.0421	0.88108
ISOC1;CGI-111	Isochorismatase domain-containing protein 1;CGI-111 protein	Q96CN7;Q9Y3B5	0.89736	1.0535	1.004
ARL3;ARFL3	ADP-ribosylation factor-like protein 3	P36405;B2R6C7;Q53X83	0.96189	0.99095	1.0014
EIF4G3	Isoform 1 of Eukaryotic translation initiation factor 4 gamma 3;EIF4G3 protein;cDNA FLJ59298, highly similar to Eukaryotic translation initiation factor 4 gamma 3	O43432-1;O43432;B4DXR2;Q59GJ0;B4DZE1;Q504Z1;A8MZE8;B4DH17	0.79466	1.1748
NME2P1	Putative nucleoside diphosphate kinase	O60361	1.0928	0.97306	0.88782
	6 kDa protein				0.98423
MAP2K1;MEK1;PRKMK1	Dual specificity mitogen-activated protein kinase kinase 1;Protein	Q02750;A4QPA9;B4DFY5	1.0343	0.97209	0.9455
VAV2	Isoform 1 of Guanine nucleotide exchange factor VAV2;101 kDa protein;Isoform 2 of Guanine nucleotide exchange factor VAV2;Isoform 3 of Guanine nucleotide exchange factor VAV2;97 kDa protein	P52735-1;P52735;P52735-2;A6NKJ3;P52735-3;A1A583	0.88106	0.87052	1.1993
GRB2;ASH	Isoform 1 of Growth factor receptor-bound protein 2;19 kDa protein;Isoform GRB3-3 of Growth factor receptor-bound protein 2	P62993-1;P62993;B0LPF3;B3KR50;Q6ICN0;P62993-2	0.94317	0.92687	1.0805
KIAA1618;ALO17	Isoform 1 of Protein ALO17	Q9HCF4-1;Q9HCF4	0.97285	0.92146	1.0556
USP47	Isoform 1 of Ubiquitin carboxyl-terminal hydrolase 47;Isoform 2 of Ubiquitin carboxyl-terminal hydrolase 47	Q96K76-1;Q96K76;Q96K76-2;A0PJ80;B3KRV9;B3KXF5	0.98326
MX2	Interferon-induced GTP-binding protein Mx2	P20592;Q75MY7;Q75MY8		0.98264
NUBP2;NUBP1	Nucleotide-binding protein 2;C447E6.1	Q9Y5Y2;B2RDN3;Q2YS46	0.91378	0.93082	1.1032
YARS	Tyrosyl-tRNA synthetase, cytoplasmic	P54577;B3KWK4	0.94767	0.9818	1.0182
CDC42;RP1-224A6.5-004	cDNA FLJ54776, highly similar to Cell division control protein 42 homolog;Isoform 2 of Cell division control protein 42 homolog;cDNA FLJ55107, highly similar to Cell division control protein 42 homolog;Isoform 1 of Cell division control protein 42 homolog;Cell division cycle 42	B4E1U9;P60953-2;P60953;B4DMH5;P60953-1;Q9UJM1;Q5JYX0;Q9UJM0	0.97503	0.9595	1.013
MTAP;MSAP	cDNA FLJ59758, highly similar to S-methyl-5-thioadenosine phosphorylase;16 kDa protein	Q13126;B4DUC8;Q05DJ2;Q5T3P3;Q6FHP1;Q6FHT1	0.98043	0.97357	0.99341
SNRPD2;SNRPD1	Small nuclear ribonucleoprotein Sm D2;similar to hCG2040270	P62316;A8K797	1.0418	0.89732	1.0081
DCTN2;DCTN50;hCG_2016464	dynactin 2;Dynactin 2 (P50), isoform CRA_b;26 kDa protein	Q13561;B2RBK5;B3KTX4;Q53H88;A8K8J9	1.1304	0.75518	1.0615
ADK	Isoform Long of Adenosine kinase;Isoform Short of Adenosine kinase	P55263-1;P55263;Q5JQ11;Q86U79;P55263-2;Q5JQ10;Q9HB33	1.0477	0.89735	1.0006
PGLS	6-phosphogluconolactonase	O95336	0.97086	1.0024	0.97196
EIF3M;HFLB5;PCID1;GA17;PNAS-125	Eukaryotic translation initiation factor 3 subunit M	Q7L2H7;A8K7X4;B4E2Q4	1.0483	0.98841	0.90775
ARPC3;ARC21	Putative uncharacterized protein ARPC3 (Fragment);Actin-related protein 2/3 complex subunit 3;cDNA FLJ51245, highly similar to Actin-related protein 2/3 complex subunit 3	A8MYY8;O15145;B2R4D5;Q2LE71;B4DM63	1.0336	0.99327	0.91736
RAD23B;RP11-131A5.1-002	UV excision repair protein RAD23 homolog B;cDNA FLJ56531, highly similar to UV excision repair protein RAD23 homolog B	P54727;B3KWK8;Q53F10;Q7Z5K8;B4DEA3;Q5W0S5	0.97168	0.95216	1.0195
POLA1;POLA	DNA polymerase;DNA polymerase alpha catalytic subunit	A6NMQ1;P09884	0.91668	1.0454
SCP2	Isoform SCPx of Non-specific lipid-transfer protein;Isoform SCP2 of Non-specific lipid-transfer protein;sterol carrier protein 2 isoform 2 precursor;cDNA FLJ58965, highly similar to Nonspecific lipid-transfer protein	P22307-1;P22307;B2R761;B4DGJ9;B4DHP6;Q5VVZ1;P22307-2;B4E0J3	1.1008	0.95023	0.8918
SUCLA2;RP11-528D24.2-010	Isoform 1 of Succinyl-CoA ligase [ADP-forming] subunit beta, mitochondrial;Isoform 2 of Succinyl-CoA ligase [ADP-forming] subunit beta, mitochondrial;cDNA FLJ54097, highly similar to Succinyl-CoA ligase (ADP-forming) beta-chain, mitochondrial	Q9P2R7-1;Q9P2R7;B2RDE7;Q5T9Q4;Q6N0B1;Q9P2R7-2;B4DRV2;Q7Z503;B4DY87;Q5T9Q5;Q9Y4T0			0.9809
ITPA;C20orf37;My049;OK/SW-cl.9;RP4-794I6.1-007;hCG_39262	Inosine triphosphate pyrophosphatase;inosine triphosphatase isoform b;Inosine triphosphatase	Q9BY32;B2BCH7;Q5NT82;A2A2N2	0.95539	0.98761	0.99851
MOBKL3;MOB3;PREI3;CGI-95;hCG_20091	Isoform 1 of Mps one binder kinase activator-like 3;Mps One Binder kinase activator-like 3 isoform 3;Isoform 2 of Mps one binder kinase activator-like 3	Q9Y3A3-1;Q9Y3A3;A8K012;Q53SE0;B4DML0;Q9Y3A3-2;B4DM50		0.9534	1.0071
RPSA;LAMBR;LAMR1;LAMR1P15	33 kDa protein;40S ribosomal protein SA;Similar to Ribosomal protein 40;similar to 40S ribosomal protein SA (p40) (34/67 kDa laminin receptor) (Colon carcinoma laminin-binding protein) (NEM/1CHD4) (Multidrug resistance-associated protein MGr1-Ag) isoform 1;Uncharacterized protein ENSP00000346598;Laminin receptor-like protein LAMRL5;similar to Ribosomal protein SA pseudogene isoform 1;17 kDa prote…	P08865;A6NE09;Q96RS2;A6NIS7	0.99863	0.95866	0.98339
PLEC1;hCG_1994702	Isoform 1 of Plectin-1;Isoform 2 of Plectin-1;Isoform 3 of Plectin-1;plectin 1 isoform 10;Isoform 4 of Plectin-1;plectin 1 isoform 8;plectin 1 isoform 2;plectin 1 isoform 3;plectin 1 isoform 7	Q15149-1;Q15149;Q15149-2;Q6S383;Q15149-3;Q6S377;Q15149-4;Q6S378;Q8WXV5;Q6S382;Q6S381;Q6S379;Q96IE3	0.83648	0.99505	1.1082
FDXR;ADXR	cDNA FLJ53329, highly similar to NADPH:adrenodoxin oxidoreductase, mitochondrial;cDNA FLJ59457, highly similar to NADPH:adrenodoxin oxidoreductase, mitochondrial;Isoform Short of NADPH:adrenodoxin oxidoreductase, mitochondrial;Isoform Long of NADPH:adrenodoxin oxidoreductase, mitochondrial;cDNA FLJ59386, highly similar to NADPH:adrenodoxin oxidoreductase, mitochondrial;cDNA FLJ36801 fis, clone AD…	B4DHX5;B4DDI7;P22570-1;P22570;B4DDI9;B4DX24;Q6GSK2;P22570-2;B4DQQ4;B3KSQ6		0.96097	0.99863
RAB22A;RAB22	Ras-related protein Rab-22A;Ras-related protein Rab-22A	Q9UL26;B3KR86;Q96IY7		0.97953
HYPK;HSPC136	Isoform 1 of Huntingtin-interacting protein K;Isoform 2 of Huntingtin-interacting protein K	Q9NX55-1;Q9NX55;Q9NX55-2	0.98749	0.97149
PLRG1	Putative uncharacterized protein PLRG1;Isoform 1 of Pleiotropic regulator 1;Isoform 2 of Pleiotropic regulator 1	A8MW61;O43660-1;O43660;B3KMK4;O43660-2		0.70691	1.2519
C20orf116	Isoform 1 of Uncharacterized protein C20orf116;Isoform 2 of Uncharacterized protein C20orf116	Q96HY6-1;Q96HY6;Q96HY6-2			0.97936
C12orf5	Uncharacterized protein C12orf5	Q9NQ88;B2R840	1.0315	1.0392	0.86713
FXN;FRDA;X25	Isoform 1 of Frataxin, mitochondrial;frataxin isoform 2 preproprotein;Isoform 2 of Frataxin, mitochondrial;19 kDa protein	Q16595-1;Q16595;A8MXJ6;Q16595-2	1.1479	0.81026
CIAPIN1;CUA001;PRO0915	40 kDa protein;Isoform 1 of Anamorsin;Isoform 3 of Anamorsin;cDNA FLJ58887, highly similar to Anamorsin	Q6FI81-1;Q6FI81;Q6FI81-3;A8K8B6;A8MXX9;B4DHB9	0.87917	1.1028	0.95482
IDH3A	Isoform 1 of Isocitrate dehydrogenase [NAD] subunit alpha, mitochondrial;Isoform 2 of Isocitrate dehydrogenase [NAD] subunit alpha, mitochondrial;cDNA FLJ52894, highly similar to Isocitrate dehydrogenase	P50213-1;P50213;B4DJB4;Q53GF8;P50213-2;B4DSY4	0.99545	0.88577	1.0552
DBNL;CMAP;SH3P7;PP5423	Isoform 3 of Drebrin-like protein;Isoform 2 of Drebrin-like protein;Isoform 1 of Drebrin-like protein;cDNA FLJ52531, highly similar to Drebrin-like protein;cDNA FLJ59450, highly similar to Drebrin-like protein	Q9UJU6-3;Q9UJU6;Q9UJU6-2;B4DXL9;Q9UJU6-1;B4DDU5;B4DEM2;B4DKZ4;B4DNX5;Q59FH4;B4DDP6;B4DDD6;B4DUF9	0.99838	0.95967	0.97798
C21orf70;PRED56	Isoform A of Uncharacterized protein C21orf70;Isoform B of Uncharacterized protein C21orf70;22 kDa protein	Q9NSI2-1;Q9NSI2;Q9NSI2-2		0.97781
CSK	Tyrosine-protein kinase CSK;cDNA FLJ51496, highly similar to Tyrosine-protein kinase CSK	P41240;A8K3B6;B2R6Q4;B4DMZ0;B5BU52;Q53EL3;B4DP99	1.0033	0.98156	0.94846
SSSCA1	Sjoegren syndrome/scleroderma autoantigen 1	O60232	1.046	0.93711	0.94998
GPS1;COPS1;CSN1	G protein pathway suppressor 1 isoform 1;G protein pathway suppressor 1 isoform 2;Isoform 3 of COP9 signalosome complex subunit 1	Q13098-1;Q13098;A8K070;Q13098-2;B4DND6;Q13098-3	1.0318	0.9233
OSTF1	cDNA FLJ75699, highly similar to Homo sapiens osteoclast stimulating factor 1 (OSTF1), mRNA;Osteoclast-stimulating factor 1	A8K646;Q92882	0.9946	0.96334	0.97465
ARL2	ADP-ribosylation factor-like protein 2;cDNA FLJ58989, moderately similar to ADP-ribosylation factor-like protein 2;Similar to ADP-ribosylation factor-like protein 2	P36404;Q53YD8;B4DGG0	0.99117	0.91614	1.025
MST4;MASK;RP6-213H19.1;hCG_1783468	cDNA FLJ54528, highly similar to Serine/threonine-protein kinase MST4;Serine/threonine-protein kinase MST4;Serine/threonine protein kinase MST4;cDNA FLJ90669 fis, clone PLACE1005519, moderately similar to Homo sapiens STE20-like kinase 3 (mst-3) mRNA;serine/threonine protein kinase MST4 isoform 2;serine/threonine protein kinase MST4 isoform 3	B4E0Y9;Q9P289;B2RAU2;Q499L9;Q8NBY1;Q8NC04;Q96SR7;Q9NWX4;Q9BXC3	0.99832	0.97041	0.96347
RNMT;KIAA0398	cDNA FLJ77439, highly similar to Homo sapiens hCMT1b mRNA (guanine-7-)methyltransferase;Isoform 2 of mRNA cap guanine-N7 methyltransferase	O43148-1;O43148;A8K946;B0YJ90;Q05D80;Q05DQ2;Q9UEB8;O43148-2		0.977
NOC3L;AD24;C10orf117;FAD24	Nucleolar complex protein 3 homolog;Putative uncharacterized protein NOC3L	Q8WTT2;A8K905;B4DXL4;A6NJZ9	0.87966	1.0734
EIF2B2;EIF2BB	Translation initiation factor eIF-2B subunit beta	P49770;Q53XC2;Q9BPX4		0.97652
VAV1;VAV	Proto-oncogene vav	P15498;B2R8B5;B4DVK9;Q96D37	0.93848	1.0139
COPS4;CSN4	COP9 signalosome complex subunit 4	Q9BT78;B3KM48;B3KN88;B3KST5;Q53FV3	1.0371	0.95349	0.93771
RAD21;HR21;KIAA0078;NXP1	Double-strand-break repair protein rad21 homolog	O60216;A8K0E0		0.97583
EIF2B5;EIF2BE	Translation initiation factor eIF-2B subunit epsilon;49 kDa protein	Q13144;Q541Z1;Q59HD8	1.0338	0.91735
UBE2O;KIAA1734	Ubiquitin-conjugating enzyme E2 O;107 kDa protein	Q9C0C9	0.99203	0.93391	1.0005
YTHDC1;KIAA1966;YT521	Isoform 1 of YTH domain-containing protein 1;Isoform 2 of YTH domain-containing protein 1	Q96MU7-1;Q96MU7;Q96MU7-2	0.83894	1.1119
LRRC40	Leucine-rich repeat-containing protein 40	Q9H9A6	0.87618	1.0739
CNBP;RNF163;ZNF9	zinc finger protein 9 isoform 1;zinc finger protein 9 isoform 2;Isoform 1 of Cellular nucleic acid-binding protein;zinc finger protein 9 isoform 4;zinc finger protein 9 isoform 5;Isoform 2 of Cellular nucleic acid-binding protein;Isoform 3 of Cellular nucleic acid-binding protein	A8K7V4;Q5U0E9;P62633-1;P62633;B2RAV9;Q4JGY0;Q4JGY1;P62633-2;P62633-3;B4DP17;Q6T598	1.008	1.0523	0.86469
LSM2;C6orf28;G7b	U6 snRNA-associated Sm-like protein LSm2	Q9Y333;Q6FGG1	0.96335	0.98673	0.97471
XPO6;KIAA0370;RANBP20	129 kDa protein;Exportin-6;127 kDa protein	Q96QU8;A1L3W4;B3KW08	0.95553	0.95743	1.0117
ACTR2;ARP2	45 kDa protein;actin-related protein 2 isoform a;Actin-related protein 2;cDNA FLJ51655, highly similar to Actin-like protein 2	P61160;B2RCP5;B4DHK9;Q8IY98;B4DWQ5	0.98119	1.0149	0.92827
RPS17	40S ribosomal protein S17;16 kDa protein;Uncharacterized protein ENSP00000352682;similar to 40S ribosomal protein S17;Similar to 40S ribosomal protein S17	P08708;B2R4U4;A6NH77	0.96263	0.97744	0.98351
APEH;D3F15S2;D3S48E;DNF15S2	Acylamino-acid-releasing enzyme;57 kDa protein	P13798	1.0009	0.96253	0.95997
SF3A3;SAP61	Splicing factor 3A subunit 3;cDNA FLJ58737, highly similar to Splicing factor 3A subunit 3	Q12874;A8K566;A8K7V1;B3KY12;Q53HM6;B4DW90	0.92755	1.0499	0.94592
TOP2A;TOP2	Isoform 4 of DNA topoisomerase 2-alpha;DNA topoisomerase 2 (Fragment);Isoform 1 of DNA topoisomerase 2-alpha;Isoform 3 of DNA topoisomerase 2-alpha;Isoform 2 of DNA topoisomerase 2-alpha	P11388-4;P11388;A6NDM0;P11388-1;B2RTS1;P11388-3;P11388-2		0.974
CDK6	Cell division protein kinase 6	Q00534;A4D1G0	0.98543	0.92867	1.0055
PPP1CC	Isoform Gamma-2 of Serine/threonine-protein phosphatase PP1-gamma catalytic subunit;Isoform Gamma-1 of Serine/threonine-protein phosphatase PP1-gamma catalytic subunit	P36873-2;P36873;P36873-1;B4DNE3;Q9UPN1			0.97308
C9orf64;RP11-575L7.5-002;hCG_2042994;RP11-575L7.5-003	UPF0553 protein C9orf64;Chromosome 9 open reading frame 64;Chromosome 9 open reading frame 64	Q5T6V5;B2RPI6;Q5T6V7;Q5T6V6	1.048		0.89804
TUBB6	TUBB6 protein	Q9BUF5;B3KM76;B3KS31;Q2NKY5	0.99462	1.0014	0.92278
MYO9B;MYR5;MYO9B variant protein	myosin IXB isoform 1;myosin IXB isoform 2;Isoform Long of Myosin-IXb	Q13459-2;Q13459;B0I1T6;Q14788;Q8WVD2;Q4LE74;Q13459-1	0.90494	1.0405
HSPB11;C1orf41;HSPC034;hCG_1780523	Heat shock protein beta-11;Putative uncharacterized protein HSPB11	Q9Y547;A6NIR2	1.0227	0.87445	1.0209
SMEK1;KIAA2010;MSTP033	Isoform 1 of SMEK homolog 1;Isoform 2 of SMEK homolog 1;Isoform 3 of SMEK homolog 1;Isoform 5 of SMEK homolog 1	Q6IN85-1;Q6IN85;Q6IN85-2;Q6IN85-3;Q6IN85-5	0.9617	0.98347
LYPLA1;APT1;LPL1	cDNA FLJ60607, highly similar to Acyl-protein thioesterase 1;Isoform 2 of Acyl-protein thioesterase 1;cDNA FLJ52008, highly similar to Acyl-protein thioesterase 1	O75608-1;O75608;B4DJV9;Q6IAQ1;O75608-2;B4DP64	0.99878	0.90621	1.0127
NDUFA4	NADH dehydrogenase [ubiquinone] 1 alpha subcomplex subunit 4	O00483;A4D109	0.95341	0.94083	1.0211
CARS2;OK/SW-cl.10	Probable cysteinyl-tRNA synthetase, mitochondrial	Q9HA77;Q6AW83;Q6MZE5		0.9717
PTPN11;PTP2C;SHPTP2	Isoform 1 of Tyrosine-protein phosphatase non-receptor type 11;Isoform 2 of Tyrosine-protein phosphatase non-receptor type 11;Isoform 3 of Tyrosine-protein phosphatase non-receptor type 11	Q06124-1;Q06124;Q06124-2;A8K1D9;Q06124-3;B3GUD3;B3GUD4;B3GUD5;Q16344	0.967	0.9758
STX5;STX5A	Isoform 1 of Syntaxin-5;Isoform 3 of Syntaxin-5;Isoform 2 of Syntaxin-5;Protein	Q13190-1;Q13190;Q13190-3;Q13190-2;B2R8T2;B4DKR0		1.0104	0.9321
MGLL;hCG_40840	monoglyceride lipase isoform 1;Monoglyceride lipase;Lysophospholipase-like protein;Monoacylglycerol lipase isoform 2	B3KRC2;Q6IBG9;Q99685;Q2VYF8;B2ZGL7	0.97343	1.0507	0.88914
PSMG3;C7orf48;PAC3	Proteasome assembly chaperone 3	Q9BT73;A8MPW2	1.0486	0.91733	0.94606
SND1;TDRD11	Staphylococcal nuclease domain-containing protein 1;cDNA FLJ54574, highly similar to Staphylococcal nuclease domain-containing protein 1	Q7KZF4;B2R5U1;B3KU67;Q59FF0;B4E299;Q86UF7	0.92694	1.0206	0.96367
FHOD1;FHOS;FHOS1	FH1/FH2 domain-containing protein 1;cDNA FLJ55372, highly similar to FH1/FH2 domain-containing protein	Q9Y613;B4DVN5		0.9702
NAP1L1;NRP;hCG_2015037	Nucleosome assembly protein 1-like 1;cDNA FLJ30458 fis, clone BRACE2009421, highly similar to NUCLEOSOME ASSEMBLY PROTEIN 1-LIKE 1;15 kDa protein;Nucleosome assembly protein 1-like 1, isoform CRA_c	P55209;B3KNT8;B3KV44	0.97096	0.94684	0.99079
CLIC4	Chloride intracellular channel protein 4;cDNA FLJ38640 fis, clone HHDPC2003472, highly similar to CHLORIDE INTRACELLULAR CHANNEL PROTEIN 4	Q9Y696;B4DWC4;Q6FIC5;Q9NVF8;B3KTR3	1.0449	0.88631	0.9771
APIP;CGI-29	Isoform 1 of APAF1-interacting protein;Putative uncharacterized protein APIP (Fragment);cDNA FLJ58961, highly similar to APAF1-interacting protein;Isoform 2 of APAF1-interacting protein	Q96GX9-1;Q96GX9;A8K9D3;A8MWR0;B4DY17;Q96GX9-2	0.94763	0.94294	1.0172
RRP9;RNU3IP2;U355K	U3 small nucleolar RNA-interacting protein 2	O43818;B2R996		0.96896
NUP205;C7orf14;KIAA0225	Nuclear pore complex protein Nup205	Q92621;A6H8X3;B4DE72;Q4VBX7;Q6DKH1;Q6P486	0.90274	0.98875	1.0136
IDH3G	Isocitrate dehydrogenase [NAD] subunit gamma, mitochondrial;isocitrate dehydrogenase 3 (NAD+) gamma isoform b precursor;NAD (H)-specific isocitrate dehydrogenase gamma subunit;NAD (H)-specific isocitrate dehydrogenase gamma subunit;Isocitrate dehydrogenase 3 gamma;22 kDa protein	P51553;O15385;O15384;Q2Q9C5;Q2Q9S4	1.0909	1.0567	0.75731
FAHD2A;CGI-105;FAHD2B	Fumarylacetoacetate hydrolase domain-containing protein 2A;Fumarylacetoacetate hydrolase domain-containing protein 2B	Q96GK7;Q6P2I3		0.96434	0.97162
GOLGA3	Isoform 1 of Golgin subfamily A member 3;Isoform 3 of Golgin subfamily A member 3;Isoform 2 of Golgin subfamily A member 3	Q08378-1;Q08378;Q08378-3;Q08378-2;A5PKX6	0.96976	0.83821	1.0959
UBE3A;E6AP;EPVE6AP;HPVE6A	Isoform II of Ubiquitin-protein ligase E3A;Isoform III of Ubiquitin-protein ligase E3A;Isoform I of Ubiquitin-protein ligase E3A	Q05086-1;Q05086;Q9BUI6;Q05086-3;A8K8Z9;Q5W7F7;Q05086-2;Q96GR7;Q9H2G0;Q9UBN9		0.96774
MRPS5	Isoform 1 of 28S ribosomal protein S5, mitochondrial	P82675-1;P82675		1.1683	0.76699
MYL6	Isoform Smooth muscle of Myosin light polypeptide 6;Isoform Non-muscle of Myosin light polypeptide 6;16 kDa protein;13 kDa protein;13 kDa protein;11 kDa protein;10 kDa protein;11 kDa protein;8 kDa protein	P60660-2;P60660;Q561V9;Q6IBG5;P60660-1	0.87874	1.1212	0.90282
C1orf123;RP5-1024G6.3-007	UPF0587 protein C1orf123;Chromosome 1 open reading frame 123	Q9NWV4;B1ARP7	0.95547	0.92374	1.0234
NUP214;CAIN;CAN;KIAA0023;RP11-544A12.7-003	Isoform 5 of Nuclear pore complex protein Nup214;Isoform 3 of Nuclear pore complex protein Nup214;Isoform 1 of Nuclear pore complex protein Nup214;Isoform 4 of Nuclear pore complex protein Nup214;Isoform 2 of Nuclear pore complex protein Nup214;Putative uncharacterized protein DKFZp686J0330	P35658-5;P35658;P35658-3;P35658-1;P35658-4;P35658-2;B4DYZ6;B4DZN4;Q5JUP9;Q7Z3C4	0.96006	0.82851	1.1139
BAT1;UAP56;XXbac-BCX270M2.2-006;XXbac-BPG296P20.6-019;DAAP-97M17.4-003;DAAP-97M17.4-006;DASS-161H22.1-017;DASS-161H22.1-009;DASS-161H22.1-018;DASS-161H22.1-014;DAAP-97M17.4-019	Isoform 2 of Spliceosome RNA helicase BAT1;Isoform 1 of Spliceosome RNA helicase BAT1;HLA-B associated transcript 1;cDNA FLJ53073, highly similar to Spliceosome RNA helicase Bat1;HLA-B associated transcript 1;HLA-B associated transcript 1;HLA-B associated transcript 1;HLA-B associated transcript 1 variant (Fragment);HLA-B associated transcript 1;HLA-B associated transcript 1;HLA-B associated tran…	Q13838-2;Q13838;Q13838-1;Q5STA0;Q5STU3;A2AB31;A2BF53;A6PWH0;B0S4X1;B0S8C2;B0UZ17;B0UZ98;B4DP52;B0V2L1;B0V2L2;A2BF54;A6PWH1;B0S4X2;B0S8C3;B0UZ18;B0UZ99;Q59G92;A2BF56;B0S4X4;B0S8B3;B0UZ21;B0UZA2;Q5STA2;Q5STU9;A2BF57;A6PWH2;B0S4X3;B0S8B2;B0UZ20;B0UZA1;A2BF55;A6PWH3;B0S8C4;B0UZ19;B0UZA0;Q5RJ65;B0V2L0	0.89561	1.031	0.9755
COPS7B;CSN7B	Isoform 1 of COP9 signalosome complex subunit 7b;Isoform 2 of COP9 signalosome complex subunit 7b	Q9H9Q2-1;Q9H9Q2;B3KV02;B3KW51;Q53GQ2;Q53S22;Q9H9Q2-2	0.93286	0.87499	1.0941
PPIH;CYP20;CYPH;hCG_21746	Peptidyl-prolyl cis-trans isomerase H;16 kDa protein;Peptidyl-prolyl cis-trans isomerase	O43447;Q6FH36;Q6FH57;A6NNE7	0.90618	0.96228	1.0332
AACS;ACSF1	Isoform 1 of Acetoacetyl-CoA synthetase;Isoform 2 of Acetoacetyl-CoA synthetase;Isoform 3 of Acetoacetyl-CoA synthetase;cDNA FLJ60054, highly similar to Homo sapiens acetoacetyl-CoA synthetase (AACS), mRNA	Q86V21-1;Q86V21;Q86V21-2;Q86V21-3;Q9H7A6;B4E296	0.96691
PSMD4;MCB1;RP11-126K1.1-014	Proteasome;Isoform Rpn10A of 26S proteasome non-ATPase regulatory subunit 4;Proteasome (Prosome, macropain) 26S subunit, non-ATPase, 4	P55036-2;P55036;Q5VWC4;P55036-1;A6PVX3	0.99314	0.90584	1.0011
MMAB	Cob(I)yrinic acid a,c-diamide adenosyltransferase, mitochondrial;19 kDa protein	Q96EY8;B2R6J3;B4DHP4			0.96642
TUBAL3	Isoform 1 of Tubulin alpha chain-like 3;50 kDa protein;Isoform 2 of Tubulin alpha chain-like 3	A6NHL2-1;A6NHL2;B4DKL2;A6NHL2-2	0.96633
EIF3H;EIF3S3	Eukaryotic translation initiation factor 3, subunit 3 gamma, 40kDa, isoform CRA_b	O15372;B3KS98;B4DJN9;Q53HG0;Q53HR0;Q5BKY2;Q6IB98	1.0124	0.90137	0.98464
FNBP1;FBP17;KIAA0554	Isoform 1 of Formin-binding protein 1;Isoform 2 of Formin-binding protein 1;Isoform 3 of Formin-binding protein 1;Isoform 4 of Formin-binding protein 1;Putative uncharacterized protein FNBP1	Q96RU3-1;Q96RU3;A8MPY8;Q96RU3-2;Q96RU3-3;Q96RU3-4;A8MS86	0.87225	1.0905	0.93519
GLTP	Glycolipid transfer protein;similar to glycolipid transfer protein	Q9NZD2		0.96597
C6orf115;HSPC280;PRO2013	Uncharacterized protein C6orf115	Q9P1F3;Q5SZC8	0.97692		0.95454
EEF1E1;P18	Eukaryotic translation elongation factor 1 epsilon-1;eukaryotic translation elongation factor 1 epsilon 1 isoform 2	O43324	0.92958	0.96906	0.99834
PNPO	Pyridoxine-5'-phosphate oxidase;cDNA FLJ59109, highly similar to Pyridoxine-5'-phosphate oxidase;cDNA FLJ59599, highly similar to Pyridoxine-5'-phosphate oxidase	Q9NVS9;B4E1D7;Q53FP0;B4E0V0;B4E152	0.90652	1.0586	0.9315
PYCARD;ASC;CARD5;TMS1	Isoform 1 of Apoptosis-associated speck-like protein containing a CARD;Isoform 3 of Apoptosis-associated speck-like protein containing a CARD;Isoform 2 of Apoptosis-associated speck-like protein containing a CARD	Q9ULZ3-1;Q9ULZ3;B2RAZ4;Q9ULZ3-3;Q9ULZ3-2	1.0047	0.906	0.98477
TMOD3	Tropomodulin-3	Q9NYL9;B2R6G7;Q5HYL6	1.0067	1.0958	0.79233
CENTD2;ARAP1;KIAA0782	Isoform 6 of Centaurin-delta-2;Isoform 3 of Centaurin-delta-2;Isoform 1 of Centaurin-delta-2;Isoform 4 of Centaurin-delta-2;Isoform 2 of Centaurin-delta-2;ArfGAP with RhoGAP domain, ankyrin repeat and PH domain 1 isoform d	Q96P48-6;Q96P48;A3KLL7;Q96P48-3;Q96P48-1;Q96P48-4;Q96P48-2;Q96P48-5;B2RTS2	0.91508	1.0018	0.97763
FMNL1;C17orf1;C17orf1B;FMNL	Isoform 2 of Formin-like protein 1;Isoform 1 of Formin-like protein 1	O95466-2;O95466;O95466-1	0.92358	0.9658	1.005
FKBP5;AIG6;FKBP51	FK506-binding protein 5;Peptidyl-prolyl cis-trans isomerase (Fragment)	Q13451;Q2TA84;Q53GX4;Q5TGM6;Q59EB8	1.0198	0.98238	0.89116
DUSP23;LDP3;VHZ	Dual specificity protein phosphatase 23	Q9BVJ7	1.0548	1.0278	0.81068
PFKP;PFKF;PFK-P	6-phosphofructokinase type C;Phosphofructokinase, platelet	Q01813;Q5VSR8;B3KS15;O14943;Q49A78;Q5VSR7;Q8WTZ9	0.95601	0.89784	1.0389
NUP88	Nuclear pore complex protein Nup88	Q99567;B4DP20	1.0373	0.89092
PDCD5;TFAR19	Programmed cell death protein 5;cDNA FLJ52456, moderately similar to Programmed cell death protein 5	O14737;B4DE64	1.0514	0.89153	0.94845
PSME4;KIAA0077	Isoform 1 of Proteasome activator complex subunit 4;Proteasome activator complex subunit 4 (Proteasome activator PA200). Isoform 2;Isoform 3 of Proteasome activator complex subunit 4	Q14997-1;Q14997;Q14997-2;Q14997-3		0.99048	0.93698
PRPF3;HPRP3;PRP3	Isoform 1 of U4/U6 small nuclear ribonucleoprotein Prp3;cDNA FLJ50575, highly similar to U4/U6 small nuclear ribonucleoprotein Prp3;Isoform 2 of U4/U6 small nuclear ribonucleoprotein Prp3	O43395-1;O43395;B2R791;B4DLS8;B4DSY9;Q53GV6;B4DM28;O43395-2		0.95342	0.97297
NDUFV2	28 kDa protein;NADH dehydrogenase [ubiquinone] flavoprotein 2, mitochondrial;Uncharacterized protein ENSP00000343430 (Fragment)	P19404;A8K750;Q6IB76;Q6IPW4;Q6LEN9;Q9UEH5;A6NK33	0.9426	0.95555	0.99135
DYNC1I2;DNCI2;DNCIC2	Isoform 2A of Cytoplasmic dynein 1 intermediate chain 2;Isoform 2E of Cytoplasmic dynein 1 intermediate chain 2;Isoform 2B of Cytoplasmic dynein 1 intermediate chain 2;Isoform 2C of Cytoplasmic dynein 1 intermediate chain 2;Isoform 2F of Cytoplasmic dynein 1 intermediate chain 2;Putative uncharacterized protein DNCI2	Q13409-1;Q13409;B4DPZ3;Q59GU5;Q13409-5;Q13409-2;Q13409-3;B4DX93;Q9H5W7;Q13409-6;Q53SA6	0.94622	0.97941
MTPN	Myotrophin	P58546;Q69YG1	1.0384	0.90529	0.94446
SMS	45 kDa protein;Isoform 1 of Spermine synthase;Isoform 2 of Spermine synthase;cDNA FLJ50114, highly similar to Spermine synthase	P52788-1;P52788;B2R9M0;P52788-2;B4DE40	1.0421	0.81912	1.026
RAN;ARA24;OK/SW-cl.81	26 kDa protein;27 kDa protein;Putative uncharacterized protein RAN;GTP-binding nuclear protein Ran;cDNA FLJ52168, highly similar to GTP-binding nuclear protein Ran	B5MDF5;P62826;A8K3Z8;B4DV51	0.93801	1.0277	0.92119
ZC3HC1;NIPA;HSPC216	Isoform 1 of Nuclear-interacting partner of ALK;Isoform 2 of Nuclear-interacting partner of ALK;Isoform 3 of Nuclear-interacting partner of ALK	Q86WB0-1;Q86WB0;Q86WB0-2;A4D1L4;Q86WB0-3	1.0721	0.85244
DDX27;RHLP;HSPC259;PP3241	Probable ATP-dependent RNA helicase DDX27	Q96GQ7;B3GQE6;Q3MI07;Q53G15	0.88288	1.041
STAT6	Isoform 1 of Signal transducer and activator of transcription 6;Isoform 2 of Signal transducer and activator of transcription 6	P42226-1;P42226;A8K316;A8K4S9;B2R680;B4DQB3;B4DR42;Q5FBW6;Q6LCD8;Q9BQD2;P42226-2	0.99706	0.95402	0.93402
ANP32A;C15orf1;LANP;MAPM;PHAP1	Acidic leucine-rich nuclear phosphoprotein 32 family member A;ANP32A protein (Fragment)	P39687;B2R6T4;Q08AJ6;Q3KPI8;Q6PKH8	0.98445	0.94012	0.95972
VAC14;TAX1BP2;TRX	Protein VAC14 homolog	Q08AM6;B3KPJ5;B4DMP4;Q9NW56		0.96141
PDCD10;CCM3;TFAR15	Programmed cell death protein 10;18 kDa protein;15 kDa protein	Q9BUL8;A8K515	1.0197	1.0271	0.83605
TRIP13	Isoform 1 of Thyroid receptor-interacting protein 13;Isoform 2 of Thyroid receptor-interacting protein 13	Q15645-1;Q15645;Q15645-2	0.96082
RASSF2;KIAA0168	Ras association domain-containing protein 2	P50749			0.96077
NHP2L1;CTA-216E10.8-008	NHP2 non-histone chromosome protein 2-like 1;NHP2-like protein 1	B1AHD1;P55769;Q6FHM6	0.93574	0.99691	0.94957
SCYE1;EMAP2	cDNA FLJ61202, highly similar to Multisynthetase complex auxiliary component p43;Multisynthetase complex auxiliary component p43;cDNA FLJ52127, highly similar to Multisynthetase complex auxiliary component p43	B4E1S7;Q12904;B3KTR2;B4DNK3	0.95959	0.9714	0.95092
HIST2H2AA3;H2AFO;HIST2H2AA;HIST2H2AA4;HIST2H2AC;H2AFQ	Histone H2A type 2-A;Histone H2A type 2-C	Q6FI13;B2R5F0;Q16777		0.91474	1.0057
RAB8B	Ras-related protein Rab-8B	Q92930;B4DMS1;Q5JPC4	0.95996	0.9447	0.97521
RNPEP;APB	Aminopeptidase B	Q9H4A4;Q7RU04	1.0506	0.9513	0.87762
TXNDC9;APACD	Thioredoxin domain-containing protein 9	O14530;B2R9G8;Q53HG4;Q8TB70	0.97583	0.94376
PRPF40A;FBP11;FLAF1;FNBP3;HYPA;HSPC225	Isoform 1 of Pre-mRNA-processing factor 40 homolog A;Isoform 3 of Pre-mRNA-processing factor 40 homolog A;107 kDa protein;formin binding protein 3;Isoform 4 of Pre-mRNA-processing factor 40 homolog A;cDNA FLJ59286, highly similar to Pre-mRNA-processing factor 40 homolog A (Fragment)	O75400-1;O75400;O75400-3;O75400-2;Q05C41;O75400-4;Q4ZG51;B4DPY2	0.84106	1.0246	1.0136
HDDC2;C6orf74;NS5ATP2;CGI-130	Isoform 1 of HD domain-containing protein 2;Isoform 2 of HD domain-containing protein 2	Q7Z4H3-1;Q7Z4H3;Q7Z4H3-2	1.0191	0.87026	0.98958
HAT1;hCG_16790	Histone acetyltransferase type B catalytic subunit;histone acetyltransferase 1 isoform b	O14929;Q6P594;Q8WWB9	1.0201	0.93708	0.92097
FABP5	Fatty acid-binding protein, epidermal;Putative uncharacterized protein FABP5;similar to fatty acid binding protein homologue	Q01469;B2R4K0;A8MTQ5	1.0337	0.88384	0.96057
PDLIM5;ENH;hCG_40208	PDZ and LIM domain protein 5;PDZ and LIM domain 5 isoform b;Enigma homolog (Fragment);PDZ and LIM domain 5 isoform d;PDZ and LIM domain 5 isoform e	Q96HC4;Q4W5K9;Q9P1D1;Q59FC9;A6NFZ5;Q8WVK0		0.9593
SET	Isoform 2 of Protein SET	Q01105-2;Q01105;B2RCX0;B4DUE2;Q5VXV2	0.95926
CRLF3;CREME9;CYTOR4;P48	Cytokine receptor-like factor 3	Q8IUI8;B2R8C3;B4DJU5			0.9591
BXDC1;RP11-397G5.1-003;RP11-397G5.1-002	Brix domain-containing protein 1;Brix domain containing 1;Brix domain containing 1	Q9H7B2;A8K800;B4DWS5;Q5VXN1;Q5VXN0;Q5VXM9	0.80153	1.3211	0.75428
C7orf24	Isoform 1 of Gamma-glutamylcyclotransferase;cDNA FLJ11717 fis, clone HEMBA1005241	O75223-1;O75223;B3KMN7	0.93121	0.95639	0.98513
PMM2	Phosphomannomutase 2;Phosphomannomutase 2 variant (Fragment)	O15305;A8K672;B2R6D4;Q59F02	0.91948	0.93969	1.0134
ELMO1;KIAA0281	Isoform 1 of Engulfment and cell motility protein 1;cDNA FLJ44602 fis, clone BLADE2008809;Isoform 2 of Engulfment and cell motility protein 1	Q92556-1;Q92556;A4D1X5;B4DJV6;Q6ZTJ0;Q92556-2;A4D1X6	0.89573	1.1141	0.86126
TUBA1C;TUBA6	Tubulin alpha-1C chain;TUBA1C protein;29 kDa protein	Q9BQE3;Q53GA7;Q8N532	0.94221	1.0008	0.92781
RPL31	60S ribosomal protein L31;ribosomal protein L31 isoform 2;ribosomal protein L31 isoform 3	P62899;B2R4C1;Q76N53;Q6IRZ0	0.91166	0.98299	0.97551
ATAD3A;RP5-832C2.1-002	Isoform 2 of ATPase family AAA domain-containing protein 3A;Isoform 1 of ATPase family AAA domain-containing protein 3A;cDNA FLJ31537 fis, clone NT2RI2000704, highly similar to ATPase family AAA domain-containing protein 3A	Q9NVI7-2;Q9NVI7;Q9NVI7-1;B3KPB3;Q5SV24	0.92608	0.96208	0.98111
MRPS17;RPMS17;HSPC011	28S ribosomal protein S17, mitochondrial precursor	Q9Y2R5;Q8IY71;Q96Q59	1.0073	0.9732	0.88638
PAICS;ADE2;AIRC;PAIS;DKFZp781N1372	Multifunctional protein ADE2;phosphoribosylaminoimidazole carboxylase, phosphoribosylaminoimidazole succinocarboxamide synthetase isoform 1	P22234;B4DGX3;Q68CQ5	1.0152	0.91451	0.93716
EXOSC4;RRP41;SKI6	Exosome complex exonuclease RRP41	Q9NPD3	0.96501	0.95081	0.95094
GORASP2	cDNA FLJ59712, highly similar to Golgi reassembly-stacking protein 2;Isoform 2 of Golgi reassembly-stacking protein 2	Q9H8Y8-1;Q9H8Y8;B4DKT0;B4DNR1;Q53TE3;Q9H8Y8-2;B4DEI4;B4DQF1	1.0353	0.87569
UBA2;SAE2;UBLE1B;HRIHFB2115	SUMO-activating enzyme subunit 2	Q9UBT2;B2RDF5;B3KMZ6;B3KNA3;B3KWB9	0.90696	0.94128	1.0182
ETHE1;HSCO	Protein ETHE1, mitochondrial	O95571;B2RCZ7	0.97994	0.94878	0.93739
SUCLG2;DKFZp586M2023	Succinyl-CoA ligase [GDP-forming] subunit beta, mitochondrial;Putative uncharacterized protein DKFZp586M2023;similar to hCG1791842;similar to hCG1791842 isoform 1	Q96I99;Q3ZCW5;Q9Y436	1.0634	0.96141	0.84112
RAP2C;RAP2A	Ras-related protein Rap-2c;Ras-related protein Rap-2a	Q9Y3L5;B3KWD6;P10114;B2RCJ1		0.95524
HCFC1;HCF1;HFC1	Putative uncharacterized protein HCFC1;Isoform 1 of Host cell factor;Isoform 2 of Host cell factor;Isoform 3 of Host cell factor	A6NEM2;P51610-1;P51610;Q05C05;P51610-2;P51610-3	0.85525	1.0545
NUDT16	U8 snoRNA-decapping enzyme	Q96DE0;B4DIZ6		0.85247	1.0552
SPTAN1;SPTA2	Isoform 1 of Spectrin alpha chain, brain;Putative uncharacterized protein SPTAN1;Isoform 2 of Spectrin alpha chain, brain;cDNA FLJ61399, highly similar to Spectrin alpha chain, brain;Isoform 3 of Spectrin alpha chain, brain	Q13813-1;Q13813;B4DGT1;Q14917;Q9UG16;A6NG51;Q13813-2;B4DTV8;Q13813-3	0.92442	0.9617	0.97506
FAF1;CGI-03	Isoform Long of FAS-associated factor 1;Isoform Short of FAS-associated factor 1;cDNA FLJ37524 fis, clone BRCAN2007119, highly similar to FAS-associated factor 1	Q9UNN5-1;Q9UNN5;A8K9X5;B4DEJ6;Q549F0;Q9UNN5-2;B1AKE3;B3KT28	0.98448	0.92286
CUL2;RP11-297A16.3-005;RP11-297A16.3-007	Cullin-2;Cullin 2;Cullin 2	Q13617;B3KT95;Q5T2B5;Q5T2B7	0.93736	0.97929	0.94419
SASH3;CXorf9;SLY	cDNA FLJ51236, highly similar to SH3 protein expressed in lymphocytes;SAM and SH3 domain-containing protein 3	B4DKQ0;O75995;B2RBY7	0.92706	0.98004
POLE3;CHRAC17	DNA polymerase epsilon subunit 3	Q9NRF9	0.77736	1.1297
PDCD11;KIAA0185	Protein RRP5 homolog	Q14690;B4DES7;B4DH82;Q2TA92;Q6P2J3	0.94686	0.966	0.94687
EDC4;HEDLS	Isoform 1 of Enhancer of mRNA-decapping protein 4;132 kDa protein;Isoform 2 of Enhancer of mRNA-decapping protein 4	Q6P2E9-1;Q6P2E9;A8K4T4;Q6P2E9-2;A6NGM1	0.94412	0.90148	1.0137
KIAA1279;KBP	KIF1-binding protein	Q96EK5		0.9531
CCBL2;KAT3;RBMXL1	Isoform 1 of Kynurenine--oxoglutarate transaminase 3;kynurenine aminotransferase III isoform 2;Putative uncharacterized protein CCBL2	Q6YP21-1;Q6YP21;B4DW13;B3KQ13;A8MY75		0.94665	0.95896
SRA1;PP7684	Steroid receptor RNA activator 1, isoform CRA_a;Isoform 2 of Steroid receptor RNA activator 1	Q9HD15-1;Q9HD15;B3KNT3;Q9HD15-2			0.9528
RHOT2;ARHT2;C16orf39	Isoform 1 of Mitochondrial Rho GTPase 2;56 kDa protein;Isoform 2 of Mitochondrial Rho GTPase 2	Q8IXI1-1;Q8IXI1;A2IDC2;Q8IXI1-2		0.99887	0.90665
ARFIP1	Isoform B of Arfaptin-1;Isoform A of Arfaptin-1;cDNA FLJ39190 fis, clone OCBBF2004647, highly similar to ARFAPTIN 1;cDNA FLJ60846, highly similar to Arfaptin-1	P53367-1;P53367;B4E273;P53367-2;Q2M2X4;Q8N8M9;B4DS69			0.95195
APPL1;APPL;DIP13A;KIAA1428	DCC-interacting protein 13-alpha	Q9UKG1;B4DQX8	1.1189	0.78452
SF3A2;SAP62	SF3A2 protein (Fragment)	Q15428;B2RBU1;Q05DF2	0.97663	0.9212	0.95646
ACTL6A;BAF53;BAF53A	Isoform 1 of Actin-like protein 6A;Isoform 2 of Actin-like protein 6A	O96019-1;O96019;B3KMN1;Q53FS0;Q6FI97;O96019-2	0.93048	1.1695	0.75405
PGM1	Isoform 1 of Phosphoglucomutase-1;cDNA, FLJ92549, highly similar to Homo sapiens phosphoglucomutase 1 (PGM1), mRNA;Isoform 2 of Phosphoglucomutase-1	P36871-1;P36871;B4DDQ8;B4DFP1;B4DPV0;Q9H1D2;B2R5N9;P36871-2;Q16106	0.89352	0.90138	1.0587
ACOX3;BRCOX;PRCOX	Isoform 1 of Peroxisomal acyl-coenzyme A oxidase 3;Isoform 2 of Peroxisomal acyl-coenzyme A oxidase 3	O15254-1;O15254;B2R856;O15254-2		0.95116
CSE1L;CAS;XPO2	Isoform 1 of Exportin-2;Isoform 3 of Exportin-2;cDNA FLJ54022, highly similar to Exportin-2	P55060-1;P55060;B2R5T4;B4DUC5;P55060-3;A3RLL6;B4DM67;B4DPS6;B4DM31	0.97966	0.89805	0.97565
PCYT1A;CTPCT;PCYT1	Choline-phosphate cytidylyltransferase A;cDNA FLJ53135, highly similar to Choline-phosphate cytidylyltransferase A;15 kDa protein;14 kDa protein	P49585;B2R8P1;B4E322			0.95059
DNM1L;DLP1;DRP1	cDNA FLJ55044, highly similar to Dynamin-1-like protein;Isoform 1 of Dynamin-1-like protein;cDNA FLJ56381, highly similar to Dynamin-1-like protein;Isoform 2 of Dynamin-1-like protein;Isoform 5 of Dynamin-1-like protein;Isoform 4 of Dynamin-1-like protein;cDNA FLJ59504, highly similar to Dynamin-1-like protein	B4DSU8;Q59GN9;O00429-1;O00429;O00429-3;B4DYR6;O00429-2;O00429-5;O00429-4;A8K4X9;B4DPZ9;Q32Q67;B4DGC9	0.96101	0.91347	0.97719
NOL5;NOP5;HSPC120	Nucleolar protein 5	Q9Y2X3;B3KN82;B4DUY3	0.85748	0.98721	1.0069
MCM2;BM28;CCNL1;CDCL1;KIAA0030	DNA replication licensing factor MCM2	P49736;B3KXZ4;B4DSV5;Q9BWF4	0.94595	0.92743	0.97741
MRPS14	28S ribosomal protein S14, mitochondrial	O60783;B2R4A5;Q96Q61	0.88453		1.0159
AP3D1;PRO0039	Isoform 5 of AP-3 complex subunit delta-1;Isoform 1 of AP-3 complex subunit delta-1;Isoform 4 of AP-3 complex subunit delta-1;Isoform 2 of AP-3 complex subunit delta-1;Isoform 3 of AP-3 complex subunit delta-1	O14617-5;O14617;O14617-1;Q6PK82;O14617-4;O14617-2;O14617-3;B0AZV8;B3KSV6;Q9UEA9;Q9UEB0	0.91845	0.99349	0.93859
UNC84B;FRIGG;KIAA0668;RAB5IP;SUN2;RP3-508I15.15-002	cDNA FLJ55508, highly similar to Sad1/unc-84-like protein 2;UNC84B protein	Q9UH99;B4DIU6;B4E2A6;Q2T9F7;Q6NT72;A8K129;B0QY62;Q504T5	0.86171	0.94997	1.0386
NUDT21;CFIM25;CPSF25;CPSF5	Cleavage and polyadenylation specificity factor subunit 5	O43809;B2R6U8	0.91491	1.0507	0.88403
ARHGAP18	Isoform 1 of Rho GTPase-activating protein 18;Isoform 2 of Rho GTPase-activating protein 18	Q8N392-1;Q8N392;A9UK01;Q8N392-2		0.94946
UCHL5;RP11-101E13.2-006;RP11-101E13.2-007;UCH37;AD-019;CGI-70;RP11-101E13.2-005;RP11-101E13.2-011;RP11-101E13.2-012	Ubiquitin carboxyl-terminal hydrolase L5;Ubiquitin carboxyl-terminal hydrolase L5;Isoform 1 of Ubiquitin carboxyl-terminal hydrolase isozyme L5;Isoform 3 of Ubiquitin carboxyl-terminal hydrolase isozyme L5;Isoform 4 of Ubiquitin carboxyl-terminal hydrolase isozyme L5;Ubiquitin carboxyl-terminal hydrolase L5;Isoform 2 of Ubiquitin carboxyl-terminal hydrolase isozyme L5;Ubiquitin carboxyl-terminal …	Q5LJA9;Q5LJA5;Q9Y5K5-1;Q9Y5K5;B2RB07;Q9Y5K5-3;B4DKB3;Q9Y5K5-4;Q5LJA3;Q9Y5K5-2;B4DW59;Q5LJB0;Q5LJB2	0.96074	0.88716	1.0001
HNRNPL;HNRPL;P/OKcl.14	Heterogeneous nuclear ribonucleoprotein L;heterogeneous nuclear ribonucleoprotein L isoform b	P14866;B2R959;Q6NTA2;A6NIT8	0.81403	1.0847	0.94888
RAB30;DKFZp686J07132	Ras-related protein Rab-30;Putative uncharacterized protein DKFZp686J07132	Q15771;A8K5R1;Q6MZH2		0.94911
TCEA1;GTF2S;TFIIS	Isoform 1 of Transcription elongation factor A protein 1;Isoform 2 of Transcription elongation factor A protein 1	P23193-1;P23193;A6NF25;A8K339;P23193-2	0.88133	1.0776	0.88827
TXN2;TRX2	cDNA FLJ55158, highly similar to Thioredoxin, mitochondrial;Thioredoxin, mitochondrial	B4DX69;Q99757	1.1561	0.82954	0.86136
GRAP;LOC400581	GRB2-related adapter protein;Putative uncharacterized protein GRAP;22 kDa protein;LOC400581 protein	Q13588;A8MW78;Q8TC17;B2RXI8			0.94849
TRAPPC4;SBDN;CGI-104;HSPC172;PTD009	Trafficking protein particle complex subunit 4;cDNA FLJ55104, moderately similar to Trafficking protein particle complex subunit4;cDNA FLJ53004, highly similar to Trafficking protein particle complex subunit 4	Q9Y296;A8K3A5;B4DME1;B4DF86	0.89301	0.85736	1.0948
EXOSC6;MTR3	Exosome complex exonuclease MTR3	Q5RKV6	1.0096		0.8871
PIN1	Peptidyl-prolyl cis-trans isomerase NIMA-interacting 1;cDNA FLJ40239 fis, clone TESTI2023436, highly similar to Peptidyl-prolyl cis-trans isomerase NIMA-interacting 1	Q13526;A8K4V9;Q8NFL2;B3KUM4	1.0183	0.90923	0.91639
URM1;C9orf74;RP11-339B21.4-002	ubiquitin related modifier 1 homolog isoform b;Ubiquitin-related modifier 1 homolog;Ubiquitin related modifier 1 homolog	B4DV08;Q9BTM9;B3KMH3;Q5T4B4	1.0278	0.86537	0.94969
RABGGTA	Geranylgeranyl transferase type-2 subunit alpha	Q92696;A8K5N2;B4E069;Q6FHF7	0.94634	0.94876
RFTN1;KIAA0084;MIG2	cDNA FLJ56561;Proliferation-inducing protein 10	Q14699;B4DVC8;B4E2S3;B4E1H7;Q5JB43;Q8N5I0;Q9BRA3	0.87215	1.0288	0.94069
BID	28 kDa protein;Isoform 2 of BH3-interacting domain death agonist;Isoform 1 of BH3-interacting domain death agonist;Isoform 4 of BH3-interacting domain death agonist	P55957-2;P55957;B3KT21;P55957-1;A8ASI8;B1PL87;P55957-4;B2ZP79	0.91353	1.0157	0.91113
HDLBP;HBP;VGL;DKFZp686L08115	Vigilin;cDNA FLJ56889, moderately similar to Vigilin;cDNA FLJ55700, moderately similar to Vigilin;Protein	Q00341;B2R5V9;Q2HJC8;Q53QU2;Q96CF6;B4DTQ2;B4DKR8;Q5HYC5	0.93546	0.90411	0.99927
SAFB2;KIAA0138	Scaffold attachment factor B2;Putative uncharacterized protein SAFB2	Q14151;A0PJ47;A8MXT5;B4DU53	0.71685	1.3596	0.7619
SNAP23	Isoform SNAP-23a of Synaptosomal-associated protein 23;Isoform SNAP-23b of Synaptosomal-associated protein 23;19 kDa protein;14 kDa protein;14 kDa protein;12 kDa protein	O00161-1;O00161;A8K287;O00161-2	0.94864	0.9187	0.9709
HNRNPH3;HNRPH3	Isoform 1 of Heterogeneous nuclear ribonucleoprotein H3;Isoform 2 of Heterogeneous nuclear ribonucleoprotein H3;Isoform 3 of Heterogeneous nuclear ribonucleoprotein H3;cDNA FLJ57726, highly similar to Heterogeneous nuclear ribonucleoprotein H3;Isoform 4 of Heterogeneous nuclear ribonucleoprotein H3;Isoform 5 of Heterogeneous nuclear ribonucleoprotein H3;Isoform 6 of Heterogeneous nuclear ribonucl…	P31942-1;P31942;Q53F48;P31942-2;A8K682;P31942-3;B4DHY1;P31942-4;B3KRE1;P31942-5;P31942-6	0.79945	1.1154	0.92288
NOL5A;NOP56;RP4-686C3.1-016;RP4-686C3.1-010	Nucleolar protein 5A;Nucleolar protein 5A;Nucleolar protein 5A	O00567;A0PJ92;A8K9K6;Q9BSN3;Q5JXT2;Q5JXT4	0.87014	1.05	0.91731
PRPS1;RP11-540N4.1-003	Ribose-phosphate pyrophosphokinase 1;Phosphoribosyl pyrophosphate synthetase 1	P60891;B2R6T7;B4DNL6;Q53FW2;B1ALA9	0.94569
GAPVD1;GAPEX5;KIAA1521;RAP6	Isoform 6 of GTPase-activating protein and VPS9 domain-containing protein 1;Isoform 1 of GTPase-activating protein and VPS9 domain-containing protein 1;Isoform 2 of GTPase-activating protein and VPS9 domain-containing protein 1;Isoform 5 of GTPase-activating protein and VPS9 domain-containing protein 1;Isoform 4 of GTPase-activating protein and VPS9 domain-containing protein 1;Isoform 3 of GTPase…	Q14C86-6;Q14C86;B0QZ65;Q14C86-1;Q14C86-2;B0QZ63;B4DK42;Q14C86-5;Q14C86-4;B0QZ64;B3KN67;Q14C86-3;B0QZ62;B4DGD8;B5MDH9;B3KTX2			0.94557
UNC13D	cDNA FLJ61434, highly similar to Unc-13 homolog D;cDNA FLJ54883, highly similar to Unc-13 homolog D	Q70J99-1;Q70J99;B4DWG9;B4DTQ6	0.94854	0.85956	1.0286
PPP1R2;IPP2;PPP1R2P3	Protein phosphatase inhibitor 2;Putative protein phosphatase inhibitor 2-like protein 3;cDNA FLJ43962 fis, clone TESTI4016822, highly similar to Protein phosphatase inhibitor 2;hypothetical protein;7 kDa protein	P41236;Q6NXS1;Q6ZU68	0.9525	0.93786
DDB1;XAP1	DNA damage-binding protein 1;cDNA FLJ51067, highly similar to DNA damage-binding protein 1;cDNA FLJ51165, highly similar to DNA damage-binding protein 1	Q16531;B2R648;B4DSA8;B4DZP5	0.9348	1.0123	0.88703
TPD52	N8 protein long isoform (Fragment);Isoform 1 of Tumor protein D52;tumor protein D52 isoform 2;Isoform 2 of Tumor protein D52;12 kDa protein	Q53EK8;Q9UCX8;P55327-1;P55327;A6NCF2;P55327-2	0.94646	0.86622	1.0201
SF3B14;CGI-110;HSPC175;HT006	Pre-mRNA branch site protein p14	Q9Y3B4;Q53TM1	1.005	0.92421	0.90352
CIAO1;WDR39	Protein CIAO1	O76071;B2RDJ6			0.94421
SF3B2;SAP145;DKFZp781L0540	splicing factor 3B subunit 2;Putative uncharacterized protein DKFZp781L0540 (Fragment)	Q13435;A8K485;B4DT19;Q7L4T5;Q7Z627;Q9BWD2;Q7Z3K9;Q96CM6	0.90344	0.94585	0.9824
CHMP4B;C20orf178;SHAX1	Charged multivesicular body protein 4b	Q9H444		0.85733	1.0303
EIF3F;EIF3S5	HCG1784554, isoform CRA_a	O00303;A8K0S2;B3KSH1;B4DEW9;B4DMT5	0.99625	0.9453	0.88908
SWAP70;KIAA0640;HSPC321	Switch-associated protein 70	Q9UH65;B4E245	0.99642	0.93335	0.90049
COPS2;CSN2;TRIP15	Isoform 2 of COP9 signalosome complex subunit 2;Isoform 1 of COP9 signalosome complex subunit 2	P61201-2;P61201;Q59EL2;P61201-1;B2R6N0;B4DIH5;Q53HJ0	0.97624	0.89316	0.96077
TTC37;KIAA0372	Tetratricopeptide repeat protein 37	Q6PGP7	0.9298	1.0004	0.89898
AQR;KIAA0560	Intron-binding protein aquarius	O60306;A5YKK3;A8K6F0;B0AZM4	0.94326	0.97391	0.91176
RPL23A;hCG_1988529	Putative uncharacterized protein RPL23A;Putative uncharacterized protein RPL23A;Protein;60S ribosomal protein L23a;18 kDa protein;18 kDa protein;similar to ribosomal protein L23a;similar to ribosomal protein L23a;similar to ribosomal protein L23a;hypothetical protein LOC729617;similar to ribosomal protein L23a;similar to ribosomal protein L23a	A8MUS3;A8MXA8;P62750;B2R5B2	0.97656	0.91241	0.93945
DDX39	cDNA FLJ55484, highly similar to ATP-dependent RNA helicase DDX39	O00148;B4DX78;Q69YT6	0.89858	1.0072	0.92206
CLIC1;NCC27	Chloride intracellular channel protein 1;18 kDa protein	O00299;Q53FB0;Q5SRT3	0.87828	0.93131	1.0182
SFRS7;hCG_15878	Isoform 1 of Splicing factor, arginine/serine-rich 7;cDNA FLJ59182, highly similar to Splicing factor, arginine/serine-rich 7;Isoform 2 of Splicing factor, arginine/serine-rich 7;Isoform 3 of Splicing factor, arginine/serine-rich 7	Q16629-1;Q16629;B4DLU6;Q564D3;Q8NB80;A6NNE8;B4DEK2;Q16629-2;Q16629-3	0.92538	0.94377	0.95777
HNRNPUL1;E1BAP5;HNRPUL1	Isoform 1 of Heterogeneous nuclear ribonucleoprotein U-like protein 1;Isoform 2 of Heterogeneous nuclear ribonucleoprotein U-like protein 1;Isoform 4 of Heterogeneous nuclear ribonucleoprotein U-like protein 1;Isoform 3 of Heterogeneous nuclear ribonucleoprotein U-like protein 1	Q9BUJ2-1;Q9BUJ2;A8K3W4;A8K5K0;A8K6U7;B3KMW7;Q9BUJ2-2;Q9BUJ2-4;B3KM60;Q9BUJ2-3	1.0021	0.95408	0.87017
MRPL15;HSPC145	39S ribosomal protein L15, mitochondrial	Q9P015;B2R739	1.0042	0.91313	0.90793
RAD50	Isoform 2 of DNA repair protein RAD50;Isoform 1 of DNA repair protein RAD50;Isoform 3 of DNA repair protein RAD50	Q92878-2;Q92878;Q92878-1;Q32P42;Q92878-3	0.81135	1.1121	0.90127
TBL1XR1;IRA1;TBLR1;TBL1X;TBL1	F-box-like/WD repeat-containing protein TBL1XR1;transducin beta-like 1X;F-box-like/WD repeat-containing protein TBL1X	Q9BZK7;A8K044;A8K4J7;O60907;Q59F53		0.9412
GBAS;NIPSNAP2	Protein NipSnap homolog 2	O75323;Q53X96	0.87086	1.0126	0.93783
EIF3G;EIF3S4	Eukaryotic translation initiation factor 3 subunit G	O75821;A8K5K5;Q6IAM0	0.94673	0.98063	0.89377
PDHB;PHE1B	Isoform 1 of Pyruvate dehydrogenase E1 component subunit beta, mitochondrial;Isoform 2 of Pyruvate dehydrogenase E1 component subunit beta, mitochondrial;35 kDa protein	P11177-1;P11177;B2R7L0;P11177-2;B4DDD7	0.9555	1.003	0.86151
TUBB2C	Tubulin beta-2C chain;cDNA FLJ11352 fis, clone HEMBA1000020, highly similar to Tubulin beta-2C chain	P68371;A2BFA2;B2R6L0;Q8IWP6;Q8IZ29;Q8N6N5;Q96HX0;A4UCT2;B3KML9	0.98166	0.92558	0.91198
GLMN;FAP48;FAP68;VMGLOM	Isoform 1 of Glomulin;Isoform 2 of Glomulin	Q92990-1;Q92990;B4DJ85;Q5VVC3;Q92990-2		0.93724	0.94213
UNQ6390/PRO21135	Isoform 1 of Translation initiation factor eIF-2B subunit alpha/beta/delta-like protein;Isoform 2 of Translation initiation factor eIF-2B subunit alpha/beta/delta-like protein	Q9BV20-1;Q9BV20;Q9BV20-2	0.92368	0.88031	1.0149
DRG2	Developmentally-regulated GTP-binding protein 2;Putative uncharacterized protein DRG2;Developmentally regulated GTP binding protein 2 variant (Fragment)	P55039;B2R8G5;Q53Y50;A8MZF9;Q59FW9	1.0071	0.9982	0.81346
RPL36AL;RPL36A;RPL44;MIG6	Protein;60S ribosomal protein L36a-like;Ribosomal protein L36a;Uncharacterized protein ENSP00000382197;similar to mCG7611;similar to mCG7611;similar to mCG7611;similar to large subunit ribosomal protein L36a	Q969Q0;B2R4V2;P83881;B2REA7;Q08ES5;A8MWY5	0.85415	0.99311	0.97147
COPS8;CSN8;hCG_1776875	COP9 signalosome complex subunit 8;COP9 signalosome subunit 8 isoform 2	Q99627;B2R8N1;Q53QS9;A8K1H6;B4DFF9	0.91857	0.98864	0.91068
TUBB;TUBB5;OK/SW-cl.56;DAAP-285E11.4-003;DADB-118P11.3-003;DAMA-26D6.3-003;DAMC-316D20.4-003;DAQB-47P19.9-004;DASS-191K16.2-003;XXbac-BCX111D4.2-003;XXbac-BPG252P9.4-003;XTP3TPATP1	Tubulin beta chain;Tubulin, beta polypeptide;Tubulin, beta;cDNA FLJ53063, highly similar to Tubulin beta-7 chain;cDNA FLJ52029, highly similar to Tubulin beta-7 chain	P07437;B4DY90;Q5SU16;Q6LC01;B4DQN9;Q5JP53;A4UCU2;B4E052;Q1KSF8;Q5ST81;Q6P602;Q96B85;Q9BUU9;B4DMU8;B4DXZ5	0.93888	0.97805	0.90054
RAC1;MIG5;hCG_14926;tcag7.839;RAC3	Isoform B of Ras-related C3 botulinum toxin substrate 1;Isoform A of Ras-related C3 botulinum toxin substrate 1;ras-related C3 botulinum toxin substrate 1 isoform Rac1c;Ras-related C3 botulinum toxin substrate 3	P63000-2;P63000;A4D2P0;P63000-1;A4D2P1;A4D2P2;P60763	0.99886	0.89377	0.92471
SFRS2;hCG_27842;SFRS2B;SRP46	Splicing factor, arginine/serine-rich 2;cDNA FLJ52570, highly similar to Splicing factor, arginine/serine-rich 2;cDNA FLJ35170 fis, clone PLACE6012942, highly similar to SPLICING FACTOR, ARGININE/SERINE-RICH 2;Isoform 1 of Splicing factor, arginine/serine-rich 2B;Isoform 2 of Splicing factor, arginine/serine-rich 2B;Uncharacterized protein ENSP00000381889;cDNA FLJ39750 fis, clone SMINT2017736, mo…	Q01130;B3KUY1;B3KWD5;Q53FN0;B4DN89;B3KVY2;Q8NAK9;Q9BRL6-1;Q9BRL6;B2R6B8;Q9BRL6-2;A8MVW9;B3KUF7;Q6NXQ0;Q8N220;B3KX15		0.94202	0.93615
CECR5	Isoform 2 of Cat eye syndrome critical region protein 5;Isoform 1 of Cat eye syndrome critical region protein 5	Q9BXW7-1;Q9BXW7;B2RCK5;Q9BXW7-2	0.98817	0.96673	0.86182
SAR1B;SARA2;SARB	GTP-binding protein SAR1b	Q9Y6B6;Q53F37;Q9H029	0.97445	0.93497	0.90552
AARSD1	cDNA FLJ56441;Isoform 2 of Alanyl-tRNA synthetase domain-containing protein 1	Q9BTE6-1;Q9BTE6;B3KSP9;B4DI73;Q9BTE6-2			0.93816
RPS26;RP11-151A6.3-001;LOC285938;hCG_1745083;tcag7.125;RPS26L1	40S ribosomal protein S26;Ribosomal protein 26 (RPS26) pseudogene;Putative uncharacterized protein RPS26;10 kDa protein;Putative 40S ribosomal protein S26-like 1;similar to 40S ribosomal protein S26;hypothetical protein LOC644928;similar to ribosomal protein S26;similar to hCG15685;13 kDa protein;13 kDa protein	P62854;Q76N56;Q5JVH5;Q75MH1;Q5JNZ5	0.91716	0.92571	0.97075
IPO7;RANBP7	Importin-7	O95373;B2R786;B3KNG9;B3KQG6	0.92187	0.94204	0.94968
H2AFY;MACROH2A1	Isoform 2 of Core histone macro-H2A.1;H2A histone family, member Y isoform 2;Isoform 1 of Core histone macro-H2A.1;cDNA FLJ55076, highly similar to Core histone macro-H2A.1;H2A histone family, member Y isoform 2 variant (Fragment)	O75367-1;O75367;O75367-2;B4DJC3;Q59FH0			0.93786
CUL3;KIAA0617	Isoform 1 of Cullin-3;Isoform 2 of Cullin-3;Isoform 3 of Cullin-3	Q13618-1;Q13618;A8K536;Q53S54;Q13618-2;Q13618-3;Q53RD1	0.91135	0.88591	1.0163
NUDT1;MTH1;hCG_18431;tcag7.546	Isoform p26 of 7,8-dihydro-8-oxoguanine triphosphatase;nudix-type motif 1 isoform p22;Isoform p22 of 7,8-dihydro-8-oxoguanine triphosphatase;Isoform p18 of 7,8-dihydro-8-oxoguanine triphosphatase;nudix-type motif 1 isoform p18	P36639-1;P36639;P36639-3;A4D205;P36639-2;P36639-4;Q8IV95;Q7Z7N6	0.97813	0.81716	1.0178
GLDC;GCSP	115 kDa protein;Glycine dehydrogenase [decarboxylating], mitochondrial	P23378;Q2M2F8;Q9HDA3	0.80741	1.0351	0.97032
EMD;EDMD;STA;XX-FW88778H2.1-010;hCG_41343	Emerin;Emerin	P50402;Q6FI02;Q5HY57		1.011	0.864
PMVK;PMKI	Phosphomevalonate kinase	Q15126;Q5TZW9;Q6FGV9	0.90832	0.98962	0.91421
NUP93;KIAA0095	Nuclear pore complex protein Nup93;cDNA FLJ32075 fis, clone OCBBF1000146, highly similar to Nuclear pore complex protein Nup93	Q8N1F7;A8K897;B3KPQ8	0.82085	1.0264	0.96416
VBP1;PFDN3	Von Hippel-Lindau binding protein 1	P61758;B2R8L5;B4DWR3;Q6FH24	0.97848	0.90828	0.924
ARF6	ADP-ribosylation factor 6	P62330;Q5U025;Q6FGZ2;Q6FH17	0.92699	0.88516	0.99757
SH3GLB1;KIAA0491;CGI-61	Isoform 2 of Endophilin-B1;Isoform 1 of Endophilin-B1	Q9Y371-2;Q9Y371;Q9Y371-1;B4E182	0.94209	0.95444	0.9129
EFHD2;SWS1;RP3-467K16.3-002	EF-hand domain-containing protein D2;EF-hand domain family, member D2	Q96C19;Q5JYW8	0.71765	1.1432	0.94853
PPIE;RP1-118J21.1-003;CYP33;RP1-118J21.1-007	Peptidyl-prolyl cis-trans isomerase;Isoform A of Peptidyl-prolyl cis-trans isomerase E;Isoform B of Peptidyl-prolyl cis-trans isomerase E;Peptidyl-prolyl cis-trans isomerase;peptidylprolyl isomerase E isoform 3	Q3S611;Q5TGA3;Q9UNP9-1;Q9UNP9;A8KAM9;B2R971;B4E3F2;Q9UNP9-2;Q5TGA2;Q5TGA1;B3KSZ1			0.93633
GFPT1;GFAT;GFPT	Isoform 1 of Glucosamine--fructose-6-phosphate aminotransferase [isomerizing] 1;Isoform 2 of Glucosamine--fructose-6-phosphate aminotransferase [isomerizing] 1	Q06210-1;Q06210;Q06210-2;Q53QE6	0.96585	0.91559	0.92754
SMC1A;DXS423E;KIAA0178;SB1.8;SMC1;SMC1L1	Structural maintenance of chromosomes protein 1A	Q14683;A8K7A6;Q68EN4;Q6MZR8;Q6P2R1	0.71704	1.3069	0.78405
CSRP1;CSRP;CYRP	Cysteine and glycine-rich protein 1	P21291;A8K268;B3KVC9;B4DY28;B4E2T4;Q59EQ5;Q5U0J2;Q6AI18;Q6AWD1;Q6ZMS3;Q9BTA4	0.87861	0.98774	0.94107
HMBS;PBGD;UPS	Isoform 1 of Porphobilinogen deaminase;Isoform 2 of Porphobilinogen deaminase	P08397-1;P08397;A8K2L0;P08397-2;B5U9V4;Q0G847;Q68Y91;Q6LER4	1.0316	0.86174	0.9137
GLRX5;C14orf87	Glutaredoxin-related protein 5	Q86SX6;Q0X088	0.97312	0.91993	0.91364
SFRS11;RP4-677H15.3-002;hCG_22837	Splicing factor, arginine/serine-rich 11;Splicing factor, arginine/serine-rich 11, isoform CRA_b;SFRS11 protein (Fragment);cDNA FLJ58939, highly similar to Splicing factor arginine/serine-rich 11;cDNA FLJ52287, highly similar to Splicing factor arginine/serine-rich 11	Q05519;Q8IWE6;Q05BU6;Q5T760;Q6PJB9;Q6PJY9;Q6PKC9;B4DTC1;B4DWT1	0.88096	0.98713	0.93853
CTBP1;CTBP;hCG_1981976	C-terminal-binding protein 1;C-terminal binding protein 1 isoform 2	Q13363;Q4KMQ8;Q4W5N3;Q7Z2Q5;Q9NSY3	0.91602	0.99812	0.89137
THRAP3;TRAP150	Thyroid hormone receptor-associated protein 3	Q9Y2W1;Q05D20;Q6P0P7;Q6PJV4;Q7Z5U1	0.88394	0.94979	0.97151
COASY;hCG_16963;PSEC0106	coenzyme A synthase isoform c;Bifunctional coenzyme A synthase;coenzyme A synthase isoform b	B2RA78;B4DLU0;Q13057		0.93504
EXOSC2;RRP4;RP11-57C19.4-003;RP11-57C19.4-006;RP11-57C19.4-002;hCG_2024976;RP11-57C19.4-005	Exosome complex exonuclease RRP4;Exosome component 2;Exosome component 2;Exosome component 2;Exosome component 2	Q13868;A2VCR1;A3KFL3;B3KQW2;A3KFL5;B4DKK6;B4E001;A3KFL2;A3KFL4;A3KFL1	0.91602	0.95611	0.9326
PRMT1;HMT2;HRMT1L2;IR1B4	HMT1 hnRNP methyltransferase-like 2 isoform 1;HMT1 hnRNP methyltransferase-like 2 isoform 3;40 kDa protein;Isoform 2 of Protein arginine N-methyltransferase 1;Isoform 3 of Protein arginine N-methyltransferase 1;cDNA FLJ60588, highly similar to Protein arginine N-methyltransferase 1	Q99873-1;Q99873;B4E3C3;Q8WUW5;Q99873-2;Q6LEU5;Q99873-3;Q2VP93;Q5U8W9;B4DJ87	0.98911	0.94114	0.87415
PPP1CA;PPP1A	protein phosphatase 1, catalytic subunit, alpha isoform 3;Serine/threonine-protein phosphatase PP1-alpha catalytic subunit;cDNA FLJ45714 fis, clone FEKID2002637, highly similar to Serine/threonine-protein phosphatase PP1-alphacatalytic subunit;protein phosphatase 1, catalytic subunit, alpha isoform 2	Q07161;P62136;B2R908;B3KXM2;A6NNR3	0.94193	0.96767	0.89389
EIF3E;EIF3S6;INT6	Eukaryotic translation initiation factor 3 subunit E	P60228;B2R806;B3KW56;Q6FG33;Q6IAX5	0.97355	0.92829	0.90132
PGAM5	Isoform 1 of Phosphoglycerate mutase family member 5;Isoform 2 of Phosphoglycerate mutase family member 5;similar to Phosphoglycerate mutase family member 5 precursor	Q96HS1-1;Q96HS1;A9LN06;Q96HS1-2		1.1188	0.74974
VPS25;DERP9;EAP20	Vacuolar protein-sorting-associated protein 25	Q9BRG1;B2R581	1.0096	0.87883	0.91399
XPO1;CRM1	Exportin-1;cDNA FLJ55480, highly similar to Exportin-1	O14980;B3KWD0;B4DR01	0.94607	0.90003	0.95612
RARS	Isoform Complexed of Arginyl-tRNA synthetase, cytoplasmic;Isoform Monomeric of Arginyl-tRNA synthetase, cytoplasmic	P54136-1;P54136;B2RBS9;B4DXW6;Q53GY4;P54136-2	0.95591	0.91604	0.92992
GSTK1;hCG_20682;HDCMD47P	Glutathione S-transferase kappa 1, isoform CRA_a;Glutathione S-transferase kappa 1;cDNA FLJ57730, highly similar to Glutathione S-transferase kappa 1	Q6P4H0;Q9Y2Q3;B3KTA6;B4DSY2;Q2NLC8;Q6FII1;B4DIH1	0.94422	0.92936	0.92807
HNRNPAB;ABBP1;HNRPAB	Isoform 2 of Heterogeneous nuclear ribonucleoprotein A/B;Putative uncharacterized protein HNRNPAB;Isoform 3 of Heterogeneous nuclear ribonucleoprotein A/B;Isoform 1 of Heterogeneous nuclear ribonucleoprotein A/B;Isoform 4 of Heterogeneous nuclear ribonucleoprotein A/B	Q99729-2;Q99729;B4DMY3;Q53F64;B5MD22;Q99729-3;B3KNN5;Q99729-1;Q99729-4	0.89417	0.97089	0.93493
MBNL1;EXP;KIAA0428;MBNL;hCG_28028;MBNL2;MBLL;MBLL39;MLP1;DKFZp686P06174;hCG_27557	Isoform EXP42 of Muscleblind-like protein 1;muscleblind-like 1 isoform a;Isoform 1 of Muscleblind-like protein 2;Isoform EXP40 of Muscleblind-like protein 1;Isoform 2 of Muscleblind-like protein 2;39 kDa protein;Isoform 3 of Muscleblind-like protein 2;muscleblind-like 1 isoform g;Muscleblind-like protein EXP40s;muscleblind-like 1 isoform e;Isoform EXP35 of Muscleblind-like protein 1;Muscleblind-l…	Q9NR56-1;Q9NR56;B4E233;Q86VM6;Q96P92;Q5VZF2-1;Q5VZF2;Q9NR56-2;Q5VZF2-2;Q5VZF2-3;A0PJJ3;A2A3S3;Q9P1F2;Q86UV8;Q86UV9;Q68DD0;Q96RE3;Q9NR56-3;B4DLS5;O95205		1.0161	0.85027
MTMR14;C3orf29	Isoform 1 of Myotubularin-related protein 14;Isoform 2 of Myotubularin-related protein 14;Isoform 3 of Myotubularin-related protein 14;Putative uncharacterized protein	Q8NCE2-1;Q8NCE2;Q8NCE2-2;Q8NCE2-3;Q8WYY9	0.98345	0.9043	0.91149
TROVE2;RO60;SSA2;RP11-101E13.3-005;hCG_41054;RP11-101E13.3-006;RP11-101E13.3-003	Isoform Long of 60 kDa SS-A/Ro ribonucleoprotein;TROVE domain family, member 2;TROVE domain family, member 2 isoform 1;TROVE domain family, member 2;cDNA FLJ13982 fis, clone Y79AA1001711, highly similar to 60 kDa SS-A/Ro ribonucleoprotein	P10155-1;P10155;B2RBB9;Q86WL3;Q5LJ99;Q5LJA0;Q86WL4;Q5LJ98;B3KN94	0.85795	0.93863	1.0021
PARVG	Isoform 1 of Gamma-parvin;Isoform 2 of Gamma-parvin;Isoform 3 of Gamma-parvin	Q9HBI0-1;Q9HBI0;Q9HBI0-2;Q9HBI0-3	0.89288	1.0807	0.82502
GCA;GCL	Grancalcin	P28676;B2R5X3	0.87391	0.98884	0.93583
POLDIP2;PDIP38;POLD4;HSPC017	Polymerase delta-interacting protein 2	Q9Y2S7;B2R846;B4DEM9;Q9UG21	0.9616	0.92009	0.91495
RBBP7;RBAP46;RP11-716A19.5-008;RP11-716A19.5-010;RP11-716A19.5-004;RP11-716A19.5-007	Histone-binding protein RBBP7;Retinoblastoma binding protein 7;Retinoblastoma binding protein 7;Retinoblastoma binding protein 7;Retinoblastoma binding protein 7	Q16576;Q5JNZ9;Q6FHQ0;A8K6A2;Q5JP00;B0R0W4;Q5JP01;Q5JNZ6	0.93613	1.0082	0.85108
IDH2	Isocitrate dehydrogenase [NADP], mitochondrial	P48735;B2R6L6;B4DFL2;B4DSZ6;Q13584;Q53GL5	0.98326	0.89402	0.91717
TFAM;TCF6L2	Transcription factor A, mitochondrial;Putative uncharacterized protein TFAM;Protein	Q00059;A9QXC6;B5BU05;Q6LES8;A8MRB2;Q05D31;Q3SX57	0.80066	1.3838	0.60959
RPL5;MSTP030	60S ribosomal protein L5	P46777;A2RUM7;B3KTM6;Q32LZ3;Q59GX9;Q8WYP1;Q9BUV4	0.97421	0.92204	0.89692
RANBP2;NUP358	E3 SUMO-protein ligase RanBP2	P49792;Q13073;Q5JC45;Q5JC46	0.99303	0.79003	1.0101
RALA;RAL	Ras-related protein Ral-A;cDNA FLJ40085 fis, clone TESTI2002993	P11233;A4D1W3;Q8N836	0.83808	0.95624	0.99856
GABARAPL2;FLC3A;GEF2	Gamma-aminobutyric acid receptor-associated protein-like 2	P60520;Q6FG91	1.0973	0.85012	0.84506
THOC5;C22orf19;KIAA0983	THO complex subunit 5 homolog;Protein;21 kDa protein	Q13769		0.93067
LYRM7;C5orf31	Putative uncharacterized protein LYRM7 (Fragment);LYR motif-containing protein 7	A8MPQ9;Q5U5X0	1.0611	0.85288	0.87593
DHX9;DDX9;LKP;NDH2	ATP-dependent RNA helicase A	Q08211;B2RNV4;B3KU66;Q05CI5;Q12803;Q32Q22;Q58F26;Q6PJK6	0.9146	1.027	0.84804
RPE;HUSSY-17;LOC729020;hCG_2024410	Isoform 1 of Ribulose-phosphate 3-epimerase;cDNA FLJ52962, highly similar to Ribulose-phosphate 3-epimerase;RcRPE (Fragment);Isoform 2 of Ribulose-phosphate 3-epimerase	Q96AT9-1;Q96AT9;A8K4S0;B4E016;Q2QD12;Q96AT9-2	0.98915	0.929	0.87092
WDR12	WD repeat-containing protein 12	Q9GZL7;B3KPA9;B4DRY7;Q53T99	0.88801	1.0099	0.89053
TUBA4A;TUBA1;hCG_2013418	Tubulin alpha-4A chain;Putative uncharacterized protein TUBA4A	P68366;B3KNQ6;A8MUB1	0.95852	0.93504	0.89453
VAPA;VAP33	Vesicle-associated membrane protein-associated protein A;cDNA, FLJ96653, Homo sapiens VAMP (vesicle-associated membrane protein)-associated protein A, 33kDa (VAPA), mRNA;vesicle-associated membrane protein-associated protein A isoform 1;Putative uncharacterized protein VAPA	Q9P0L0;A8KA83;A6NDZ0;A8MY38	0.93253	0.97377	0.88178
	Similar to His3		0.92883
C17orf49	20 kDa protein;Uncharacterized potential DNA-binding protein C17orf49;14 kDa protein	Q8IXM2;B4DIV3	0.87533	0.9975	0.91347
UBE2G2;hCG_1641424	Ubiquitin-conjugating enzyme E2 G2;Ubiquitin carrier protein (Fragment);ubiquitin-conjugating enzyme E2G 2 isoform 2	P60604;A8K3L4;A8MW66;A6NMQ7		0.92871
AIM1;hCG_33516	Absent in melanoma 1 protein;cDNA FLJ61405, highly similar to Absent in melanoma 1 protein	Q9Y4K1;B3KPT0;B3KWJ0;B4DLI1;B4DU04;Q6P5P8;Q96QW7	0.91036	0.94692
CNOT1;CDC39;KIAA1007;NOT1;AD-005	Isoform 1 of CCR4-NOT transcription complex subunit 1;Isoform 2 of CCR4-NOT transcription complex subunit 1;Isoform 3 of CCR4-NOT transcription complex subunit 1;Isoform 4 of CCR4-NOT transcription complex subunit 1	A5YKK6-1;A5YKK6;B3KPW6;B3KS60;B4DYL7;A5YKK6-2;A5YKK6-3;A5YKK6-4;B4DTM8	0.95661	0.90071	0.92773
NP;PNP	cDNA FLJ25678 fis, clone TST04067, highly similar to PURINE NUCLEOSIDE PHOSPHORYLASE;Purine nucleoside phosphorylase	Q8N7G1;P00491;B2R8S5;Q9P1G4	0.90651	0.9381	0.94014
SLC12A2;NKCC1	Isoform 1 of Solute carrier family 12 member 2;Isoform 2 of Solute carrier family 12 member 2	P55011-1;P55011;Q4G117;Q53ZR1;P55011-3;Q59GB7		0.92758
WDR5;BIG3	WD repeat-containing protein 5	P61964	0.82662	1.0628	0.89307
U2AF1;U2AF35;U2AFBP;DKFZp313J1712;hCG_401287	Splicing factor U2AF 35 kDa subunit;U2 small nuclear RNA auxillary factor 1 isoform b;U2 small nuclear RNA auxillary factor 1 isoform c;hypothetical protein	Q01081;B5BU08;Q7Z780;Q69YM7;Q701P4;Q71RF1	0.83906	1.0171	0.92626
MAFK	cDNA FLJ55268, highly similar to Septin-9	A2VCQ5;B4E0N2	0.95711	1.2161	0.6091
GNB2L1	Lung cancer oncogene 7;Guanine nucleotide-binding protein subunit beta-2-like 1;cDNA FLJ38347 fis, clone FCBBF4000173, highly similar to Guanine nucleotide-binding protein subunit beta 2-like 1;Proliferation-inducing gene 21;cDNA FLJ60170, highly similar to Guanine nucleotide-binding protein subunit beta 2-like 1	Q53HU2;Q5VLR4;P63244;Q6FH47;B3KTJ0;Q5J8M6;B4DVD2	0.98088	0.92022	0.87982
BLMH	61 kDa protein;Bleomycin hydrolase;cDNA FLJ57650, highly similar to Bleomycin hydrolase	Q13867;B2R796;B4DXF3	0.93229	0.88473	0.96388
ANP32E;RP4-790G17.1-002;hCG_1998392;RP4-790G17.1-004	Acidic leucine-rich nuclear phosphoprotein 32 family member E;acidic (leucine-rich) nuclear phosphoprotein 32 family, member E isoform 3;cDNA FLJ54218, highly similar to Acidic leucine-rich nuclear phosphoprotein 32 family member E;Acidic (Leucine-rich) nuclear phosphoprotein 32 family, member E	Q9BTT0;Q53F20;Q5TB18;Q5TB20;B4E0D5;Q5TB19	0.9083	0.89387	0.97698
NONO;NRB54	Non-POU domain-containing octamer-binding protein;Protein	Q15233;A8K525	0.80339	0.90994	1.0658
GMPPA	Isoform 2 of Mannose-1-phosphate guanyltransferase alpha;Isoform 1 of Mannose-1-phosphate guanyltransferase alpha	Q96IJ6-2;Q96IJ6;Q96IJ6-1;B3KMT4	1.0307	0.81255	0.93484
STRAP;MAWD;UNRIP	cDNA FLJ51909, highly similar to Serine-threonine kinase receptor-associatedprotein;19 kDa protein	Q9Y3F4;B0AZV0;B2R5S5;B4DNJ6	0.95076	0.92808	0.89824
RPS6KA3;ISPK1;RSK2;RPS6KA2;RSK3	Ribosomal protein S6 kinase alpha-3;Isoform 2 of Ribosomal protein S6 kinase alpha-2;ribosomal protein S6 kinase, 90kDa, polypeptide 2 isoform b;Isoform 1 of Ribosomal protein S6 kinase alpha-2	P51812;B2R9V4;B4DG22;B4DKZ2;Q7Z2J3;Q7Z2J4;Q15349-2;Q15349;A6NND1;B3KTK9;Q15349-1		0.92556
ADSL;AMPS	cDNA FLJ59367, highly similar to Adenylosuccinate lyase	P30566-1;P30566;B4DP46;B4DUM2;Q71UA4	0.93693	0.8997	0.93993
MRPS10;MSTP040	28S ribosomal protein S10, mitochondrial	P82664;B2RE89;B4DP77;Q9BZS5	0.97864	0.91628	0.88144
ARPC5L	Actin-related protein 2/3 complex subunit 5-like protein	Q9BPX5;B3KPC7	0.90265	0.94886	0.92429
FAM105B	Protein FAM105B	Q96BN8			0.92484
MAP2K2;MEK2;MKK2;PRKMK2;hCG_23544	Dual specificity mitogen-activated protein kinase kinase 2;Mitogen-activated protein kinase kinase 2, isoform CRA_d	P36507;Q7Z370;B3KS97	0.95913	0.95598	0.85863
IFIT5;RI58	Interferon-induced protein with tetratricopeptide repeats 5;cDNA FLJ53857, highly similar to Interferon-induced protein with tetratricopeptide repeats 5	Q13325;B2R5X9;Q6IAX3;B4DDV1		0.92404
CTPS	CTP synthase 1	P17812;B4DMB5;B4DR64;B4E1E0	0.92514	0.96498	0.88163
SFRS10;TRA2B	Splicing factor, arginine/serine-rich 10 (Transformer 2 homolog, Drosophila) variant;cDNA, FLJ96718, highly similar to Homo sapiens splicing factor, arginine/serine-rich 10 (transformer 2 homolog, Drosophila) (SFRS10), mRNA;Isoform 1 of Splicing factor, arginine/serine-rich 10;cDNA FLJ40872 fis, clone TUTER2000283, highly similar to Homo sapiens transformer-2-beta (SFRS10) gene;13 kDa protein	Q59GA1;B2RDQ3;P62995-1;P62995;Q68DZ9;P62995-3;B4DVK2;Q8N1H4	0.95007	0.88201	0.93912
ACADVL;VLCAD	cDNA FLJ56425, highly similar to Very-long-chain specific acyl-CoAdehydrogenase, mitochondrial;Isoform 2 of Very long-chain specific acyl-CoA dehydrogenase, mitochondrial	P49748-1;P49748;B4DEA8;B4DEB6;Q53HR2;P49748-2;B3KPA6;B3KPX1	0.83094	0.99903	0.94106
MATR3;KIAA0723	Putative uncharacterized protein MATR3;Matrin-3	A8MXP9;P43243;B3KM87;B4DF66;B4DRS1;Q5CZA7;Q68D11;Q9H4N1	0.78931	1.0831	0.89828
SRP68	Isoform 1 of Signal recognition particle 68 kDa protein;Isoform 2 of Signal recognition particle 68 kDa protein	Q9UHB9-1;Q9UHB9;B3KMI9;B3KWY7;B4DVI7;Q9UHB9-2;B3KUU5;Q96K97	0.89106	0.98186	0.89412
ILF3;DRBF;MPHOSPH4;NF90	Isoform 4 of Interleukin enhancer-binding factor 3;Isoform 1 of Interleukin enhancer-binding factor 3;Isoform 3 of Interleukin enhancer-binding factor 3;Isoform 6 of Interleukin enhancer-binding factor 3;Isoform 2 of Interleukin enhancer-binding factor 3;Isoform 5 of Interleukin enhancer-binding factor 3;Interleukin enhancer binding factor 3 isoform c variant (Fragment)	Q12906-4;Q12906;Q12906-1;Q12906-3;Q12906-6;A8K590;A8K6F2;Q12906-2;Q12906-5;B4DDF3;B4DFG4;Q59GP7	0.86052	0.95752	0.94688
USP4;UNP;UNPH	Isoform UNPEL of Ubiquitin carboxyl-terminal hydrolase 4;Ubiquitin carboxyl-terminal hydrolase (Fragment);Isoform UNPES of Ubiquitin carboxyl-terminal hydrolase 4;Ubiquitin carboxyl-terminal hydrolase (Fragment)	Q13107-1;Q13107;A8K6Y0;Q08AK7;Q53FJ3;Q13107-2;Q53H56	0.80738		1.0355
PTPN6;HCP;PTP1C	Isoform 2 of Tyrosine-protein phosphatase non-receptor type 6;Isoform 1 of Tyrosine-protein phosphatase non-receptor type 6;protein tyrosine phosphatase, non-receptor type 6 isoform 3;Isoform 3 of Tyrosine-protein phosphatase non-receptor type 6	P29350-3;P29350;Q53EL0;Q53XS4;P29350-1;A8K306;B4DPS0;B4DTD7;Q9UK67;P29350-2	0.82974	1.0565	0.8777
EML4;C2orf2;EMAPL4	Echinoderm microtubule-associated protein-like 4;EML4 protein;Putative uncharacterized protein EML4	Q9HC35;B2RBK3;B2RTW7;A6H8Y6;B5MCW9;B4DIT9;B5MD40	0.81225	0.99152	0.95865
PABPN1;PAB2;PABP2	Isoform 1 of Polyadenylate-binding protein 2;Isoform 2 of Polyadenylate-binding protein 2	Q86U42-1;Q86U42;Q86U42-2;B4DEH8	0.82689	1.1357	0.79957
TRIM28;KAP1;RNF96;TIF1B	Isoform 1 of Transcription intermediary factor 1-beta;Isoform 2 of Transcription intermediary factor 1-beta	Q13263-1;Q13263;B2R8R5;Q13263-2	0.95803	0.89819	0.90593
EIF3EIP;AL022311.1-001;EIF3S6IP;HSPC021;HSPC025;MSTP005;AL022311.1-002;hCG_41840	Eukaryotic translation initiation factor 3, subunit E interacting protein;Eukaryotic translation initiation factor 3 subunit E-interacting protein;cDNA FLJ59381, highly similar to Eukaryotic translation initiation factor 3 subunit 6-interacting protein;Eukaryotic translation initiation factor 3, subunit E interacting protein	B0QY89;B3KPB9;Q9Y262;B2RDG6;B4DQF6;B4DYB2;B0QY90;B3KNG0;Q7Z5X3;Q8N7H0	0.90238	0.90268	0.95669
IQGAP1;KIAA0051	Ras GTPase-activating-like protein IQGAP1	P46940;A4QPB0;A7MBM3;B4DNP4;B4E2M0;Q05DN7;Q5FWG8;Q6P1N4;Q96PA3	0.89518	0.83734	1.028
HDAC1;RPD3L1;RP4-811H24.2-010	Histone deacetylase 1;Histone deacetylase 1	Q13547;B4DRG0;B5BU61;B5MGH2;Q5HYD4;Q6IT96;Q5TEE2	0.82306	1.0719	0.86528
SRP72	Signal recognition particle 72 kDa protein	O76094;A0PJJ5;Q0D2M6;Q71V07;Q86X80	0.89039	0.91484	0.95484
LSM7	U6 snRNA-associated Sm-like protein LSm7	Q9UK45;O75243	0.98746	0.89685	0.87571
HNRNPU;RP11-11N7.3-002;HNRPU;SAFA;U21.1;RP11-11N7.3-004;RP11-11N7.3-003	heterogeneous nuclear ribonucleoprotein U isoform a;Isoform Long of Heterogeneous nuclear ribonucleoprotein U;Isoform Short of Heterogeneous nuclear ribonucleoprotein U;cDNA FLJ54020, highly similar to Heterogeneous nuclear ribonucleoprotein U;cDNA FLJ44920 fis, clone BRAMY3011501, highly similar to Heterogeneous nuclear ribonucleoprotein U	Q5RI17;Q96BA7;Q00839-1;Q00839;Q00839-2;Q9UEL2;B4DLR3;Q5RI19;Q7Z4Q5;B3KX72;Q5RI18	0.8346	0.99156	0.93372
EIF6;EIF3A;ITGB4BP;OK/SW-cl.27	Eukaryotic translation initiation factor 6;eukaryotic translation initiation factor 6 isoform c	P56537;Q6IBN8;Q96TD5	0.91408	0.94479	0.90049
EEF2;EF2	Elongation factor 2;cDNA FLJ56548, highly similar to Elongation factor 2	P13639;B2RMP5;B4DMC6;B4DRE8;Q6PK56;Q8TA90;B4DPU3	0.92011	0.94904	0.88921
MTA2;MTA1L1;PID	Metastasis-associated protein MTA2	O94776;Q68DB1	0.82325	1.1808	0.75317
MRPS12;RPMS12;RPSM12	28S ribosomal protein S12, mitochondrial	O15235;Q53X98		0.91903
SSNA1;NA14	Sjoegren syndrome nuclear autoantigen 1	O43805	0.90691	0.93037
SFRS5;HRS;SRP40	CS0DF038YO05 variant (Fragment);Isoform SRP40-1 of Splicing factor, arginine/serine-rich 5;Isoform SRP40-4 of Splicing factor, arginine/serine-rich 5;Isoform SRP40-2 of Splicing factor, arginine/serine-rich 5	Q59EK7;Q13243-1;Q13243;B4DJK0;B4DUA4;Q86U32;Q13243-3;Q13243-2;B5BUD8;Q6FGE0	0.90269	1.1021	0.75062
HNRPDL;JKTBP	Isoform 1 of Heterogeneous nuclear ribonucleoprotein D-like;Isoform 2 of Heterogeneous nuclear ribonucleoprotein D-like;Isoform 3 of Heterogeneous nuclear ribonucleoprotein D-like	O14979-1;O14979;B4DGN3;B4DTA2;O14979-2;O14979-3	0.85337	0.97891	0.92251
PSMG2;HCCA3;PAC2;TNFSF5IP1	Proteasome assembly chaperone 2;20 kDa protein;20 kDa protein;HSPC260 (Fragment)	Q969U7;B0YJB3;Q9NRV1;Q9P1R6;A6NNV5;Q9P0C1	0.97354	0.93174	0.84924
GNPNAT1;GNA1	Glucosamine 6-phosphate N-acetyltransferase	Q96EK6	0.8859	0.96068	0.90661
CISD2;CDGSH2;ERIS;ZCD2	CDGSH iron sulfur domain-containing protein 2	Q8N5K1	1.0283	0.87534	0.84939
SRM;SPS1;SRML1	Spermidine synthase	P19623;B1AKP9		0.89002	0.94459
ZC3H13;KIAA0853	Isoform 1 of Zinc finger CCCH domain-containing protein 13;Isoform 2 of Zinc finger CCCH domain-containing protein 13	Q5T200-1;Q5T200;B3KQG8;Q5T200-2;A0PJJ2;B3KMG8;Q32Q34;Q6PJ96		0.91675
PIH1D1;NOP17	PIH1 domain-containing protein 1	Q9NWS0			0.91671
FUBP3;FBP3	Isoform 1 of Far upstream element-binding protein 3;Putative uncharacterized protein FUBP3	Q96I24-1;Q96I24;A3KFK8;Q96I24-2;A3KFL0;A6NJ37	0.73767	1.1081	0.90422
ACBD6	Acyl-CoA-binding domain-containing protein 6	Q9BR61;B2RAA8		0.91666
ACAA1;ACAA;PTHIO	3-ketoacyl-CoA thiolase, peroxisomal;acetyl-Coenzyme A acyltransferase 1 isoform b	P09110;B4DEN6;Q8NCW8;Q96CA6	1.0136	1.0291	0.70625
IPO11;RANBP11	Ran binding protein 11 isoform 1;Importin-11	B4DZ73;Q9UI26;B3KN03	1.0251	0.87802	0.84538
RBM14;SIP	Isoform 1 of RNA-binding protein 14;RNA binding motif protein 14 variant (Fragment)	Q96PK6-1;Q96PK6;B3KMN4;B4DNG4;Q59GV2	0.83557	1.0932	0.81971
RAP1B;OK/SW-cl.11	Ras-related protein Rap-1b;Ras-related protein Rap-1b-like protein;18 kDa protein;cDNA FLJ50714, moderately similar to Ras-related protein Rap-1b;PNAS-140 (Fragment);cDNA FLJ50711, moderately similar to Ras-related protein Rap-1b	P61224;B2R5Z2;A6NIZ1;B4DQI8;B4DW94;Q9BXV4;B4DW74		0.96997	0.86162
INPP5B	Isoform 1 of Type II inositol-1,4,5-trisphosphate 5-phosphatase;Isoform 2 of Type II inositol-1,4,5-trisphosphate 5-phosphatase;Isoform 3 of Type II inositol-1,4,5-trisphosphate 5-phosphatase;Isoform 4 of Type II inositol-1,4,5-trisphosphate 5-phosphatase	P32019-1;P32019;P32019-2;B3KMW4;P32019-3;P32019-4	1.0509	0.78066
DDX19A;DDX19L;DDX19B;DBP5;DDX19;DKFZp686C21137;hCG_1998531	ATP-dependent RNA helicase DDX19A;Isoform 1 of ATP-dependent RNA helicase DDX19B;cDNA FLJ50635, highly similar to ATP-dependent RNA helicase DDX19A;DEAD (Asp-Glu-Ala-As) box polypeptide 19 isoform 3;DDX19-like protein variant (Fragment)	Q9NUU7;B2RPL0;B4DRZ7;Q69YM2;Q9UMR2-1;Q9UMR2;B3KNE9;Q2NL95;Q53G16;Q7Z4W5;Q9HBZ9;B4DS24;Q68DY7;B4DL69;Q96KE7;Q59FQ9	0.95239	0.95473	0.84
PPID;CYP40;CYPD	40 kDa peptidyl-prolyl cis-trans isomerase	Q08752;B2R9V2;Q05DH6;Q6FGM6		0.94135	0.88978
TCEB1	Transcription elongation factor B polypeptide 1;12 kDa protein;11 kDa protein;9 kDa protein	Q15369	0.96502	0.91462	0.86611
ADD1;ADDA;RP11-520M5.1-003;hCG_20629;LA04NC01-25A3.2-001	Isoform 3 of Alpha-adducin;Isoform 1 of Alpha-adducin;adducin 1 (alpha) isoform d;Adducin 1;OTTHUMP00000041238	P35611-3;P35611;P35611-1;A2A3P0;A2A3N8;B4DI79;B4DPW4;P35611-2;Q16155;Q86XM2;Q96D30;Q4TT76		0.91501
KIAA0776	UPF0555 protein KIAA0776	O94874;A0PJ53;B4DJ57;Q49AT0	0.97612		0.8531
CROP;CREAP1;O48	Isoform 1 of Cisplatin resistance-associated overexpressed protein	O95232-1;O95232;A8K3C5;B3KN54;B4DJ96;Q6PKC2;Q86Y74		0.91413
KIF2A;KIF2;KNS2	Isoform 4 of Kinesin-like protein KIF2A;Isoform 3 of Kinesin-like protein KIF2A;Isoform 1 of Kinesin-like protein KIF2A;Isoform 2 of Kinesin-like protein KIF2A	O00139-4;O00139;B4DM85;O00139-3;O00139-1;B0AZS5;O00139-2;B4DY54		0.91407
CHERP;DAN26;SCAF6	Isoform 1 of Calcium homeostasis endoplasmic reticulum protein;cDNA FLJ51519, highly similar to Homo sapiens calcium homeostasis endoplasmic reticulum protein (CHERP), mRNA	Q8IWX8-1;Q8IWX8;B4DL82;B4DPM4;Q59ET1	0.96831	0.95224	0.81996
HCCS;CCHL	Cytochrome c-type heme lyase	P53701;B3KUS1;Q68D50		0.91321
MYH10	Isoform 3 of Myosin-10;Isoform 2 of Myosin-10;Isoform 1 of Myosin-10	P35580-3;P35580;B2RWP9;Q4LE45;P35580-2;Q149N4;Q15753;Q9UE82;P35580-1;Q6PK16;Q9BWG0;Q9UMG3	0.91317
HDDC3	Isoform 1 of HD domain-containing protein 3;Isoform 2 of HD domain-containing protein 3	Q8N4P3-1;Q8N4P3;Q8N4P3-2		0.62455	1.2013
RPS15A;OK/SW-cl.82	40S ribosomal protein S15a;similar to hCG1994130;hypothetical protein	P62244;A8K7H3;B2R4W8	0.89964	0.95051	0.88745
WDR61	WD repeat-containing protein 61;23 kDa protein	Q9GZS3		0.92989	0.89455
ACAD9;hCG_2022772	Acyl-CoA dehydrogenase family member 9, mitochondrial;Acyl-Coenzyme A dehydrogenase family, member 9, isoform CRA_b	Q9H845;Q59FN3;Q9H9W4		1.0542	0.76944
GSPT1;ERF3A	G1 to S phase transition 1 isoform 1;G1 to S phase transition 1 isoform 2;Eukaryotic peptide chain release factor GTP-binding subunit ERF3A	A8K2W7;B2RCT6;Q96GF2;P15170;Q7KZX8	0.91509	0.96093	0.85907
DECR1;DECR	2,4-dienoyl-CoA reductase, mitochondrial	Q16698;Q7LDK6	0.78397	1.0286	0.9221
EIF3D;EIF3S7	Putative uncharacterized protein EIF3D;Eukaryotic translation initiation factor 3 subunit D	A8MWD3;O15371;B2R7D4;B4DTF8;B4DVY1;B4E1K8	0.8752	0.94524	0.91187
SKI2W;SKIV2L;DADB-112B14.3-001;DAMC-178C20.6-001;DAQB-331I12.7-001;DASS-264H16.1-001;hCG_43698;DDX13;SKIV2;W	superkiller viralicidic activity 2-like homolog;Superkiller viralicidic activity 2-like;Helicase SKI2W	B4DF09;B4DM01;B4DSY1;B4E0N1;O76046;Q59F56;Q5ST66;Q96BC0;Q9BQJ5;Q9NPK3;Q5JP73;Q15477	0.97177		0.8497
COMMD1;C2orf5;MURR1	COMM domain-containing protein 1	Q8N668;B4DFQ4;Q53EN2;Q53Q75;Q53QP8;Q53SJ8		0.91058
MOB4A;MOBKL1A;MOBKL1B;C2orf6;MOB4B;MOBK1B;hCG_1641487	30 kDa protein;cDNA FLJ52228, highly similar to Mps one binder kinase activator-like 1A;Mps one binder kinase activator-like 1A;Isoform 1 of Mps one binder kinase activator-like 1B;Isoform 2 of Mps one binder kinase activator-like 1B;Putative uncharacterized protein MOBKL1B (Fragment);MOB1, Mps One Binder kinase activator-like 1A (Yeast), isoform CRA_a	B4DRY3;Q4W5E0;Q7L9L4;B2R8U6;Q9H8S9-1;Q9H8S9;Q9H8S9-2;A6NDE7;B3KSH6	0.87442	0.89225	0.96492
SRP19;hCG_2039564	Signal recognition particle 19 kDa protein;HCG2039564, isoform CRA_d	P09132;B2R4E9;Q05D77	0.93363	0.88735
CDK2;CDK2deltaT	Cell division protein kinase 2;cyclin-dependent kinase 2 isoform 2;29 kDa protein;cDNA FLJ54979, highly similar to Homo sapiens cyclin-dependent kinase 2 (CDK2), transcript variant 2, mRNA	P24941;A8K7C6;O75100;B4DDL9		0.94047	0.88051
	Uncharacterized protein C2orf79	Q6GMV3	1.0225	0.7636	0.94522
UBXD7;KIAA0794	Isoform 1 of UBX domain-containing protein 7;Isoform 2 of UBX domain-containing protein 7;23 kDa protein	O94888-1;O94888;B4E126;O94888-2		0.74696	1.0734
STXBP2;hCG_22249;UNC18B	syntaxin binding protein 2 isoform b;cDNA FLJ54775, highly similar to Syntaxin-binding protein 2;cDNA FLJ53447, highly similar to Syntaxin-binding protein 2	Q9BU65;Q15833;B4E175;O00184;Q53GF4;B4DY46	0.97134	0.91434	0.84467
BLOC1S1;BLOS1;GCN5L1;RT14	Biogenesis of lysosome-related organelles complex 1 subunit 1;9 kDa protein	P78537;A1L4Q9	1.0581	1.0482	0.62391
RPS13	40S ribosomal protein S13	P62277;B2R549	0.87789	0.94506	0.90722
EBNA1BP2;EBP2	EBNA1 binding protein 2	Q99848;Q6IB29		1.0497	0.77003
RPL36	60S ribosomal protein L36	Q9Y3U8;B2R4Y1;Q9BYF3	0.8991	0.88457	0.94587
ILF2;NF45;PRO3063	Interleukin enhancer-binding factor 2;Interleukin enhancer binding factor 2 variant (Fragment)	Q12905;B2R8G7;B4DY09;Q53FG3	0.8685	0.99495	0.86594
GTF2E1;TF2E1	General transcription factor IIE subunit 1	P29083;Q05DN6;Q53F88		0.90973
JTV1;PRO0992	Multisynthetase complex auxiliary component p38;28 kDa protein;Putative uncharacterized protein ENSP00000383327	Q13155;B2R7M3;A8MU58	0.93672	0.92632	0.86319
CAD	CAD protein;Putative uncharacterized protein CAD	P27708;Q53SY7;Q53SZ4;Q96CK3	0.91853	0.87628	0.93133
SRRM1;SRM160	Putative uncharacterized protein SRRM1;Isoform 1 of Serine/arginine repetitive matrix protein 1	Q8IYB3-2;Q8IYB3;A9Z1X7;Q8IYB3-1	0.89076	0.94949	0.8855
C2orf47	Uncharacterized protein C2orf47, mitochondrial	Q8WWC4	1.0159	0.86967	0.83975
N6AMT1;C21orf127;HEMK2;PRED28;hCG_401157	N(6)-adenine-specific DNA methyltransferase 1;N-6 adenine-specific DNA methyltransferase 1 isoform 2	Q9Y5N5;B2RA97;Q96F73		0.90838
PSMG1;C21LRP;DSCR2;PAC1	Isoform 1 of Proteasome assembly chaperone 1;Isoform 2 of Proteasome assembly chaperone 1	O95456-1;O95456;B2RD51;O95456-2;B5BUN2	1.032	0.87455	0.81805
POLR1A	DNA-directed RNA polymerase I subunit RPA1	O95602;Q53T12;Q6GMQ2;Q96AG9;Q9H6T2		0.90815
MMS19;MMS19L;RP11-452K12.5-020	cDNA FLJ55586, highly similar to MMS19-like protein;Isoform 4 of MMS19 nucleotide excision repair protein homolog;Isoform 5 of MMS19 nucleotide excision repair protein homolog;MMS19 nucleotide excision repair homolog	Q96T76-1;Q96T76;B3KPE5;B4DQX2;B4E2I3;Q96T76-4;Q96T76-5;B0QZ75;B0QZ74	0.97028	0.73876	1.0152
EIF4E;EIF4EL1;EIF4F	eukaryotic translation initiation factor 4E isoform 2;eukaryotic translation initiation factor 4E isoform 3;Eukaryotic translation initiation factor 4E;similar to hCG1777996	A8MX72;Q32Q75;P06730	0.89785	0.9102	0.91571
TUBA4B;TUBA4	Putative tubulin-like protein alpha-4B	Q9H853	0.89103	0.99006	0.84211
IK;RED;RER	RED protein;Protein Red	B2R5Y4;B4DEH2;Q6IPD8;Q95HA6;Q9H4P6;Q9UK43;Q9Y3Z5;Q13123		0.90772
CKAP5;KIAA0097	Isoform 1 of Cytoskeleton-associated protein 5;Isoform 2 of Cytoskeleton-associated protein 5	Q14008-1;Q14008;Q0VAX7;Q8IYN5;Q14008-2;Q2TA89;Q6NSH4		0.90755
DDX46;KIAA0801	cDNA FLJ78679, highly similar to Homo sapiens DEAD (Asp-Glu-Ala-Asp) box polypeptide 46 (DDX46), mRNA	Q7L014;A8K6X3;Q0VGL8	0.92243	0.89605	0.90376
KPNA4;QIP1	Importin subunit alpha-4	O00629;A8K4S6	0.87086	0.96176	0.88961
PWP1	Periodic tryptophan protein 1 homolog;cDNA FLJ51512, highly similar to Periodic tryptophan protein 1 homolog	Q13610;A8K3R6;B4DJV5;Q05BL3;Q53FW9;Q6PIN4;Q6PKI5;Q86X79;Q9BV37;B4DNL1		0.90726
ISOC2;hCG_38648	Isoform 2 of Isochorismatase domain-containing protein 2, mitochondrial;Isoform 1 of Isochorismatase domain-containing protein 2, mitochondrial;isochorismatase domain containing 2 isoform 3	Q96AB3-2;Q96AB3;Q96AB3-1;Q6ZN91	0.9125	0.89282	0.91605
KARS;hCG_21765;KIAA0070	lysyl-tRNA synthetase isoform 1;Lysyl-tRNA synthetase;cDNA FLJ44621 fis, clone BRACE2016896, highly similar to Lysyl-tRNA synthetase	A8MSK1;Q9HB23;Q15046;Q6ZTI3	0.92912	0.91536	0.87683
PSMD9	Isoform p27-L of 26S proteasome non-ATPase regulatory subunit 9;Isoform p27-S of 26S proteasome non-ATPase regulatory subunit 9;13 kDa protein;9 kDa protein	O00233-1;O00233;B2RD35;O00233-2	0.91865	0.85283	0.94917
DKFZp686N09117;ZRANB2;ZIS;ZNF265	Putative uncharacterized protein DKFZp686N09117;Isoform 1 of Zinc finger Ran-binding domain-containing protein 2;Isoform 2 of Zinc finger Ran-binding domain-containing protein 2	Q68CX7;Q68DP0;O95218-1;O95218;O95218-2	0.90676
MCM4;CDC21	cDNA FLJ54365, highly similar to DNA replication licensing factor MCM4;DNA replication licensing factor MCM4	A4FS09;B4DLA6;P33991;B3KMX0	0.88704	0.91411	0.91841
NUP98;ADAR2	Isoform 5 of Nuclear pore complex protein Nup98-Nup96;Isoform 1 of Nuclear pore complex protein Nup98-Nup96;nucleoporin 98kD isoform 4;Isoform 4 of Nuclear pore complex protein Nup98-Nup96;Protein	P52948-5;P52948;P52948-1;A8KA17;P52948-2;P52948-4;B4DWF8;Q9HDC8		1.0478	0.76523
PAPSS1;ATPSK1;PAPSS	Bifunctional 3'-phosphoadenosine 5'-phosphosulfate synthetase 1	O43252;Q05BW9;Q4W5F0;Q4W5H3;Q6IAX6	0.86903	0.94344
PLAA;PLAP	Phospholipase A-2-activating protein;81 kDa protein	Q9Y263		0.90619
MRPL49;C11orf4;NOF1;OK/SW-cl.67	39S ribosomal protein L49, mitochondrial;Mitochondrial ribosomal protein L49 variant (Fragment)	Q13405;B2R4G6;Q59GE9	0.87491	0.88524	0.95748
CLPB;HSP78;SKD3	Isoform 2 of Caseinolytic peptidase B protein homolog;Isoform 1 of Caseinolytic peptidase B protein homolog;cDNA FLJ53237, highly similar to Caseinolytic peptidase B protein	Q9H078-2;Q9H078;B4DXJ7;B4DXW4;Q7Z777;Q9H078-1;B4DXP7		0.90586
NMD3;CGI-07	Similar to NMD3 homolog;cDNA FLJ57520, highly similar to Homo sapiens NMD3 homolog (NMD3), mRNA;35 kDa protein	Q96D46;B3KMN5;B3KT11;B4DKU1		0.90574
NAT10;ALP;KIAA1709	N-acetyltransferase 10	Q9H0A0;B4DFD5;Q05CW7	0.85482	0.95807	0.904
ZYX;hCG_96060	Zyxin;cDNA FLJ53160, highly similar to Zyxin	Q15942;A4D2G6;B4DY85;Q28617;Q9BUS0;B4DQR8;B4DQX7;Q96AF9	0.91463	0.98005	0.82217
RP3-351K20.2-016;ECHDC1;RP3-351K20.2-006;RP3-351K20.2-007	Novel enoyl-CoA hydratase/isomerase family protein;Isoform 1 of Enoyl-CoA hydratase domain-containing protein 1;Isoform 2 of Enoyl-CoA hydratase domain-containing protein 1;Uncharacterized hypothalamus protein HCDASE;Novel enoyl-CoA hydratase/isomerase family protein;enoyl Coenzyme A hydratase domain containing 1 isoform 3	Q5TEF9;Q9NTX5-1;Q9NTX5;Q9NTX5-2;Q9NZ30;Q5TEF7;Q5TEG0		0.93893	0.87168
MRPL51;MRP64;CDA09;HSPC241	39S ribosomal protein L51, mitochondrial	Q4U2R6	0.90471
FARSB;FARSLB;FRSB;HSPC173	Phenylalanyl-tRNA synthetase beta chain	Q9NSD9;A8K666;B4DFM0;Q4ZFX1;Q57ZJ5;Q9BR63	0.90839	0.95182	0.85362
HNRNPA3;HNRPA3;D10S102	Isoform 1 of Heterogeneous nuclear ribonucleoprotein A3;Isoform 2 of Heterogeneous nuclear ribonucleoprotein A3;cDNA FLJ58832, highly similar to Heterogeneous nuclear ribonucleoprotein A3;FBRNP	P51991-1;P51991;Q66K53;Q8NFG3;P51991-2;B4DDB6;B4E3E6;Q65ZQ3	0.7871	0.99988	0.92684
SFRS3;SRP20;hCG_14802	Splicing factor, arginine/serine-rich 3;cDNA FLJ52832, highly similar to Splicing factor, arginine/serine-rich 3	P84103;B2R6F3;B4E241	0.91968	0.96227	0.83158
HNRNPR;HNRPR;RP5-1057J7.2-002;hCG_38907;DKFZp686A13234	Heterogeneous nuclear ribonucleoprotein R;heterogeneous nuclear ribonucleoprotein R isoform 1;Heterogeneous nuclear ribonucleoprotein-R2;heterogeneous nuclear ribonucleoprotein R isoform 4;heterogeneous nuclear ribonucleoprotein R isoform 3	O43390;B2R7W4;Q9BV64;B4DMB1;B4DT28;Q2L7G6;B4DMD1;Q0VGD6;Q7Z334;Q6MZS5	0.72975	1.0533	0.93028
BOLA2;BOLA2A;My016;BOLA2B	BolA-like protein 2;14 kDa protein;14 kDa protein;Isoform 2 of BolA-like protein 2	Q9H3K6-1;Q9H3K6;A1L454;A7YDY3;Q9H3K6-2	0.96706	0.80782	0.93628
CRK;hCG_28712	v-crk sarcoma virus CT10 oncogene homolog isoform b;Isoform Crk-II of Proto-oncogene C-crk;Isoform Crk-I of Proto-oncogene C-crk	Q96GA9;P46108-1;P46108;B0LPE8;P46108-2		0.90313
PELP1;HMX3;MNAR	Isoform 2 of Proline-, glutamic acid- and leucine-rich protein 1;cDNA FLJ56414, highly similar to Homo sapiens proline-, glutamic acid-, leucine-rich protein 1 (PELP1), mRNA;Putative uncharacterized protein PELP1;cDNA FLJ51806, highly similar to Homo sapiens proline-, glutamic acid-, leucine-rich protein 1 (PELP1), mRNA	Q8IZL8-2;Q8IZL8;Q8IZL8-1;A8K548;B4DR36;A6NDZ9;O15451;B4DEX7	0.74179	1.0554	0.91203
DYNLL1;DLC1;DNCL1;DNCLC1;HDLC1;DYNLL2;DLC2	Dynein light chain 1, cytoplasmic;Dynein light chain 2, cytoplasmic	P63167;Q6FGH9;Q96FJ2;B2R5B4	0.92183	0.87955	0.9075
CCDC25	Coiled-coil domain-containing protein 25;CCDC25 protein;11 kDa protein;CCDC25 protein	Q86WR0;Q6PK69;Q7Z5U5;Q0VGD4		0.86589	0.93998
GBF1;KIAA0248	Golgi-specific brefeldin A-resistance guanine nucleotide exchange factor 1	Q92538;Q05BW6;Q149P0;Q149P1;Q504U7	0.86413	0.81855	1.0261
ELAVL1;HUR	cDNA FLJ60076, highly similar to ELAV-like protein 1	Q15717;B4DVB8;Q53XN6	0.76293	1.0647	0.88014
DEF6;IBP	Differentially expressed in FDCP 6 homolog	Q9H4E7;B2RBP7;B3KSI1	0.8959	0.90915
RPS21;RP5-908M14.8-003;hCG_41768	40S ribosomal protein S21;Ribosomal protein S21	P63220;Q6FGH5;Q8WVC2;Q9BYK1	0.89661	0.90284	0.90805
COPS7A;CSN7A;DERP10	COP9 signalosome complex subunit 7a;18 kDa protein	Q9UBW8;A8K9A6;Q567U8	0.9041	0.95706	0.84585
NDUFA6;LYRM6;NADHB14	NADH dehydrogenase (ubiquinone) 1 alpha subcomplex, 6, 14kDa	P56556;B2RE54;Q6FGW0;Q6IBT8	0.94083	0.85808	0.90717
CUL4B;KIAA0695;hCG_40765	Isoform 2 of Cullin-4B;Putative uncharacterized protein CUL4B;Isoform 1 of Cullin-4B	Q13620-2;Q13620;B1APK5;A6NE76;B3KVX4;Q13620-1		0.90195
PRPF4;PRP4	Isoform 1 of U4/U6 small nuclear ribonucleoprotein Prp4;Isoform 2 of U4/U6 small nuclear ribonucleoprotein Prp4	O43172-1;O43172;B2R7V4;Q59EL4;Q5T1M8;Q6IAP9;O43172-2;Q5T1M7	0.91892	0.87978	0.90709
YWHAH;YWHA1;LL22NC03-44A4.1-004	14-3-3 protein eta;Tyrosine 3-monooxygenase/tryptophan 5-monooxygenase activation protein, eta polypeptide	Q04917;B2R6N6;Q9H4N8;A2IDB2	0.91424	0.91538	0.87608
MYO1G	Isoform 1 of Myosin-Ig;Isoform 4 of Myosin-Ig	B0I1T2-1;B0I1T2;Q6ZNK5;B0I1T2-4	0.79361	0.94921	0.9628
TRAPPC2L;HSPC126	Isoform 3 of Trafficking protein particle complex subunit 2-like protein;Isoform 1 of Trafficking protein particle complex subunit 2-like protein;Isoform 2 of Trafficking protein particle complex subunit 2-like protein;13 kDa protein	Q9UL33-3;Q9UL33;Q9UL33-1;B2R4M9;Q9UL33-2	0.94614	0.76261	0.99632
RPS25	40S ribosomal protein S25;14 kDa protein;7 kDa protein	P62851;B2R4M7	0.81776	0.96597	0.92131
BCKDHB;RP1-279A18.1-002;hCG_1817356	2-oxoisovalerate dehydrogenase subunit beta, mitochondrial;Branched chain keto acid dehydrogenase E1, beta polypeptide	P21953;B4E2N3;Q6LCK9;Q9BQL0;Q5T2J3		0.9256	0.87774
EIF4A1;DDX2A;EIF4A	Eukaryotic initiation factor 4A-I;46 kDa protein;Putative uncharacterized protein (Fragment)	P60842;A8K088;A8K7F6;B2R6L8;B4DNH2;B4E047;Q9BRB1	0.92705	0.93876	0.83888
FTO;KIAA1752	64 kDa protein;Isoform 1 of Protein fto	Q9C0B1-1;Q9C0B1;B3KU60		0.82344	0.97946
TSFM	Isoform 2 of Elongation factor Ts, mitochondrial;Isoform 1 of Elongation factor Ts, mitochondrial;cDNA FLJ60259, highly similar to Elongation factor Ts, mitochondrial	P43897-2;P43897;P43897-1;B4E391;Q561V7;B4DHY8	0.89506	0.89473	0.91449
PSPC1;PSP1	Isoform 1 of Paraspeckle component 1;Isoform 2 of Paraspeckle component 1	Q8WXF1-1;Q8WXF1;B4DWI8;Q8WXF1-2	0.75585	0.90266	1.0453
PRPSAP2	Phosphoribosyl pyrophosphate synthetase-associated protein 2;cDNA FLJ52829, highly similar to Phosphoribosyl pyrophosphatesynthetase-associated protein 2;30 kDa protein	O60256;B2R7R5;B4E329;B4E1M8	0.90993	0.88694	0.90655
RAB4B;PP1596	Isoform 2 of Ras-related protein Rab-4B;Isoform 1 of Ras-related protein Rab-4B	P61018-2;P61018;P61018-1		0.90094
VPRBP;DCAF1;KIAA0800;RIP	Isoform 1 of Protein VPRBP;Isoform 2 of Protein VPRBP;Isoform 3 of Protein VPRBP	Q9Y4B6-1;Q9Y4B6;Q9Y4B6-2;Q9Y4B6-3;B3KN11		1.1558	0.64555
SFRS1;ASF;SF2;SF2P33;OK/SW-cl.3	Isoform ASF-1 of Splicing factor, arginine/serine-rich 1;Isoform ASF-2 of Splicing factor, arginine/serine-rich 1;Isoform ASF-3 of Splicing factor, arginine/serine-rich 1	Q07955-1;Q07955;A8K1L8;B2R6Z7;Q07955-2;Q07955-3;Q59FA2	0.86286	0.93716	0.90126
OGT	Isoform 3 of UDP-N-acetylglucosamine--peptide N-acetylglucosaminyltransferase 110 kDa subunit;Isoform 1 of UDP-N-acetylglucosamine--peptide N-acetylglucosaminyltransferase 110 kDa subunit;Isoform 2 of UDP-N-acetylglucosamine--peptide N-acetylglucosaminyltransferase 110 kDa subunit	O15294-1;O15294;B4DTL6;O15294-3;Q9H5T3;O15294-2;Q548W1	0.8181	0.92639	0.95377
SEC24B	Protein transport protein Sec24B;SEC24 (S. cerevisiae) homolog B isoform b	O95487;B4DTM6;B4E2E1;Q0VG08		0.88703	0.91146
PTBP1;PTB;hCG_20560	Isoform 1 of Polypyrimidine tract-binding protein 1;polypyrimidine tract-binding protein 1 isoform a;Isoform 2 of Polypyrimidine tract-binding protein 1	P26599-1;P26599;Q9BUQ0;P26599-2	0.81695	0.95099	0.92974
AATF;CHE1;DED;HSPC277	Protein AATF	Q9NY61;B3KQ26		0.89912
AP1S1;AP19;CLAPS1	Isoform 1 of AP-1 complex subunit sigma-1A;Isoform 2 of AP-1 complex subunit sigma-1A	P61966-1;P61966;B2R5D8;P61966-2;Q53YA7	0.98308	0.75676	0.95736
FAM82B;CGI-90	Regulator of microtubule dynamics protein 1;cDNA FLJ53118, highly similar to Protein FAM82B;29 kDa protein	Q96DB5;B4DNF5;B4DZW6	0.84293	0.90925	0.9439
MYH9	Isoform 1 of Myosin-9;Isoform 2 of Myosin-9	P35579-1;P35579;A8K6E4;B4E3S1;Q60FE2;Q86XU5;Q99529;P35579-2;Q2PS10;Q9UMJ0	0.60892	1.0575	1.0284
FUBP1	cDNA FLJ53425, highly similar to Far upstream element-binding protein 1;68 kDa protein;Isoform 1 of Far upstream element-binding protein 1;Putative uncharacterized protein FUBP1	B4DT31;Q96AE4-1;Q96AE4;B4DWL1;B4E0X8;Q59FU3;Q6PJY1;A6NL74	0.84355	1.0515	0.79853
SAE1;AOS1;SUA1;UBLE1A	SUMO-activating enzyme subunit 1	Q9UBE0;B2RDP5;B4DY66	0.89659	0.88396	0.913
FAM136A	Protein FAM136A	Q96C01;B0AZT6		0.89782
QIL1	Protein QIL1	Q5XKP0		0.98955	0.80565
WDR18	WD repeat-containing protein 18	Q9BV38		0.89754
SEPT6;KIAA0128;SEP2;RP5-876A24.2-002;hCG_23191	58 kDa protein;cDNA FLJ58821, highly similar to Septin-6;Septin;Septin;49 kDa protein;Isoform V of Septin-6;Isoform I of Septin-6;cDNA FLJ59732, highly similar to Septin-6	Q14141-1;Q14141;B4DZW0;Q6B514;B1AMS2;Q14141-4;Q548C9;Q6NT82;Q14141-2;B4E049;Q541S4;Q14141-3;B4DPT4	0.92786	1.1688	0.59588
ARMC1;ARCP	Armadillo repeat-containing protein 1;cDNA FLJ57447, highly similar to Armadillo repeat-containing protein 1	Q9NVT9;B4E2W7			0.89707
MTHFS	5-formyltetrahydrofolate cyclo-ligase;21 kDa protein;20 kDa protein;19 kDa protein	P49914;Q96EE9		0.82052	0.97336
CPSF1;CPSF160	Cleavage and polyadenylation specificity factor subunit 1	Q10570;B4DEF4;Q9C0J6	0.84792	0.94521	0.89727
HIST1H1C;H1F2;HIST1H1A;H1F1	Histone H1.2;Histone H1.1	P16403;A8K4I2;Q02539	0.77831	0.95402	0.95795
DHX15;DBP1;DDX15	Putative pre-mRNA-splicing factor ATP-dependent RNA helicase DHX15	O43143;B4E0S6	0.85128	0.97464	0.86421
SNRPA	U1 small nuclear ribonucleoprotein A	P09012;B2R802		0.96616	0.8272
IKBKAP;ELP1;IKAP	Elongator complex protein 1	O95163;B3KMT0;B3KNB2;B3KVS1;B3KXE7;B4E3I9;Q4LE38;Q68DI5;Q8N516	0.81013	1.0084	0.87148
GOLGB1	Golgin B1;Golgin subfamily B member 1	B2ZZ91;B4DTZ9;Q14789		0.89654
BTF3L4;hCG_2031635	Transcription factor BTF3 homolog 4;basic transcription factor 3-like 4 isoform 2	Q96K17;B3KNJ1;Q6PJ77	0.91359	1.048	0.72801
SON;C21orf50;DBP5;KIAA1019;NREBP	Isoform I of SON protein;Isoform D of SON protein;Isoform F of SON protein;SON DNA-binding protein isoform F;Isoform G of SON protein;260 kDa protein;Isoform A of SON protein;Isoform C of SON protein;252 kDa protein;Isoform B of SON protein;SON DNA-binding protein isoform B;Isoform J of SON protein;SON protein;Isoform E of SON protein	P18583-9;P18583;P18583-5;P18583-1;P18583-7;P18583-2;P18583-4;P18583-3;P18583-10;P18583-8;A0JLP4;Q3SWV4;Q6PKE0;P18583-6		0.92598	0.86655
SEPT7;CDC10;DKFZp586I031	Isoform 1 of Septin-7;Isoform 2 of Septin-7;cDNA FLJ53636, highly similar to Septin-7	Q16181-1;Q16181;A8K3D0;Q3LIE9;Q59EY4;Q16181-2;A4GYY8;B4DUD6;Q3B7A3;Q8TC62;B4DNE4;B4DPQ6;Q5JXL7	0.92433	1.172	0.59134
OSBPL11;ORP11;OSBP12;pp14733	Oxysterol-binding protein-related protein 11;Oxysterol-binding protein;Putative uncharacterized protein pp14733	Q9BXB4;A8K9I7;A8MZ15;Q9GZM0;Q8WYV5		0.89572
POLR2B	DNA-directed RNA polymerase II subunit RPB2	P30876;A8K1A8	0.91985	0.90117	0.86554
TBCA	16 kDa protein;Tubulin-specific chaperone A	O75347;Q6FGD7	0.99784	0.78778	0.90093
WDR91;HSPC049	Isoform 1 of WD repeat-containing protein 91;Putative uncharacterized protein WDR91;Isoform 2 of WD repeat-containing protein 91;Isoform 3 of WD repeat-containing protein 91	A4D1P6-1;A4D1P6;B5MDH8;A4D1P6-2;A4D1P6-3		0.89524
SUGT1	Isoform 1 of Suppressor of G2 allele of SKP1 homolog;Isoform 2 of Suppressor of G2 allele of SKP1 homolog	Q9Y2Z0-1;Q9Y2Z0;A2A303;A8K5T7;Q9Y2Z0-2;A8K7W3;B4DYC6;Q5TAM6	0.92902	0.92057	0.83455
SFRS9;SRP30C	Splicing factor, arginine/serine-rich 9;cDNA FLJ56571, highly similar to Splicing factor, arginine/serine-rich 9	Q13242;A8K3M9;B4DFT9	0.81216	0.96342	0.90838
MRPS26;C20orf193;RPMS13	28S ribosomal protein S26, mitochondrial	Q9BYN8	1.0119	0.777
HNRNPA1;HNRPA1;HNRPA1L3;HNRNPA1L	Isoform A1-B of Heterogeneous nuclear ribonucleoprotein A1;Isoform A1-A of Heterogeneous nuclear ribonucleoprotein A1;Isoform 2 of Heterogeneous nuclear ribonucleoprotein A1;Similar to Heterogeneous nuclear ribonucleoprotein A1;Putative heterogeneous nuclear ribonucleoprotein A1-like protein 3;29 kDa protein;similar to heterogeneous nuclear ribonucleoprotein A1;similar to heterogeneous nuclear ri…	P09651-1;P09651;P09651-2;A8K4Z8;Q0VAC0;Q3MI39;Q6IPF2;Q9BSM5;P09651-3;P0C7M2;Q32P51;B4E0B5;B4DP35	0.78808	0.99604	0.89888
SFRS12;SRRP86	Isoform 2 of Splicing factor, arginine/serine-rich 12;Isoform 1 of Splicing factor, arginine/serine-rich 12	Q8WXA9-2;Q8WXA9;Q8WXA9-1;A4FTW3;B3KRJ9;Q59EW7;Q69YM5	0.84759	0.94036
EIF2B4;EIF2BD;hCG_1784435	Isoform 2 of Translation initiation factor eIF-2B subunit delta;Isoform 1 of Translation initiation factor eIF-2B subunit delta;eukaryotic translation initiation factor 2B, subunit 4 delta isoform 3	Q9UI10-2;Q9UI10;Q9UI10-1;Q9HBP7;Q53RY7;Q71US4;Q9Y3W7		0.89392
RBM8A;RBM8;HSPC114;MDS014	Isoform 1 of RNA-binding protein 8A;Isoform 2 of RNA-binding protein 8A	Q9Y5S9-1;Q9Y5S9;B3KQI9;Q9Y5S9-2	0.75478	1.0757	0.84932
GSPT2;ERF3B	Eukaryotic peptide chain release factor GTP-binding subunit ERF3B	Q8IYD1;B4DQM6		0.98661	0.79939
IFIH1;MDA5;RH116	Isoform 1 of Interferon-induced helicase C domain-containing protein 1	Q9BYX4-1;Q9BYX4;A8KA76;Q53TB6;Q53TP4		0.89391	0.89182
RARS2;RARSL;RP3-382I10.6-004	Putative uncharacterized protein RARS2 (Fragment);Probable arginyl-tRNA synthetase, mitochondrial;Arginyl-tRNA synthetase 2, mitochondrial	A8MX73;Q5T160;B2RDT7;Q5T161		0.90221	0.88351
TIMM17A;MIMT17;TIM17;TIM17A;TIMM17	Mitochondrial import inner membrane translocase subunit Tim17-A	Q99595;A0PJ74;B2RDM5;Q7RU05		0.89265
SLFN5	Isoform 1 of Schlafen family member 5;Isoform 2 of Schlafen family member 5	Q08AF3-1;Q08AF3;B4E0B1;B4E128;Q08AF3-2		0.89628	0.88902
KIAA1967;DBC1	Isoform 1 of Protein KIAA1967;Isoform 2 of Protein KIAA1967	Q8N163-1;Q8N163;B2RB79;B3KTJ9;Q8N163-2	0.84925	0.90573	0.92102
BTK;AGMX1;ATK;BPK;RP1-164F3.2-007;hCG_20400	Tyrosine-protein kinase BTK;Bruton agammaglobulinemia tyrosine kinase, isoform CRA_b;Tyrosine-protein kinase BTK isoform 65	Q06187;B2RAW1;Q3MS94;Q3MS96;Q9NPI2;Q9NPI3;Q9P0L3;Q9P0L5;Q9P0L6;Q9P0L7;Q9P0M0;Q5JY90;Q9P0L4;Q9P0L8;Q572P5	0.94576	0.88486	0.84478
PPP4C;PPP4;PPX	Serine/threonine-protein phosphatase 4 catalytic subunit	P60510;Q5U086		0.97297	0.81027
GEMIN5	Gem-associated protein 5	Q8TEQ6;Q58EZ8	0.87496	1.0064	0.79337
MYO18A;KIAA0216;MYSPDZ	Isoform 1 of Myosin-XVIIIa;Isoform 4 of Myosin-XVIIIa;Isoform 3 of Myosin-XVIIIa;Isoform 2 of Myosin-XVIIIa;Isoform 5 of Myosin-XVIIIa	Q92614-1;Q92614;Q92614-4;B4DYM1;B4DZ32;Q5QD01;Q92614-3;B3KVF8;B4DFN7;B4E0T8;Q9NYE8;Q92614-2;Q92614-5	0.65925	0.94169	1.0728
PRPS2	Isoform 2 of Ribose-phosphate pyrophosphokinase 2;Isoform 1 of Ribose-phosphate pyrophosphokinase 2	P11908-2;P11908;P11908-1;B2R860	0.90862	0.89912	0.86554
EIF3J;EIF3S1;PRO0391	Eukaryotic translation initiation factor 3 subunit J;cDNA FLJ57599, moderately similar to Eukaryotic translation initiation factor 3 subunit 1	O75822;B4DUI3	0.90993		0.87217
RPL27	60S ribosomal protein L27;60S ribosomal protein L27;60S ribosomal protein L27	P61353;B2R4D8;Q8WTY3;Q6LCU2	0.85466	0.91935	0.89839
BCLAF1;BTF;KIAA0164	Isoform 1 of Bcl-2-associated transcription factor 1;Isoform 2 of Bcl-2-associated transcription factor 1;Isoform 4 of Bcl-2-associated transcription factor 1	Q9NYF8-1;Q9NYF8;A2RU75;Q6DCA8;Q9NYF8-2;Q9NYF8-4;B0AZU3	0.86767	0.95071	0.85402
ADSS;ADSS2	Adenylosuccinate synthetase isozyme 2	P30520;B1AQM5;B4E1L0	0.93478	0.9129	0.82428
CYFIP2;KIAA1168;PIR121	Isoform 2 of Cytoplasmic FMR1-interacting protein 2;Isoform 1 of Cytoplasmic FMR1-interacting protein 2	Q96F07-2;Q96F07;Q96F07-1;Q9NSN1	0.83118	1.0895	0.75085
DARS;PIG40	Aspartyl-tRNA synthetase, cytoplasmic	P14868;A8K3J2;Q53R85;Q53T60;Q68CR9	0.90439	0.87685	0.88886
KHSRP;FUBP2	KH-type splicing regulatory protein;Isoform 2 of Far upstream element-binding protein 2;cDNA FLJ51330, highly similar to Far upstream element-binding protein 2	Q92945-1;Q92945;Q92945-2;B4DV73	0.84194	0.95935	0.86817
RBM12;KIAA0765;HRIHFB2091	RNA-binding protein 12	Q9NTZ6;B3KQH4;B3KRU2;B4DRP9;Q69YJ7	0.98271	0.91973	0.76701
MAPRE1	Microtubule-associated protein RP/EB family member 1;cDNA FLJ52068, highly similar to Microtubule-associated protein RP/EB family member 1	Q15691;A2VCR0;B2R6I7;B4DM33	0.84669	0.96633	0.8554
CDK5	Cell division protein kinase 5;Protein kinase CDK5 splicing variant	Q00535;Q6IAW3;A1XKG3		0.92067	0.85822
COPE;hCG_2001439	Coatomer subunit epsilon;epsilon subunit of coatomer protein complex isoform b;epsilon subunit of coatomer protein complex isoform c	O14579;Q53HJ6;Q6IBB8;Q7Z4Z1;Q9UGP6;A6NKA3;A6NE29		0.93907	0.83978
UBE2E1;UBCH6;hCG_14891	Ubiquitin-conjugating enzyme E2 E1;18 kDa protein;ubiquitin-conjugating enzyme E2E 1 isoform 2	P51965;B2RBX4;A6NDQ7		0.98673	0.79199
RWDD1;DFRP2;CGI-24;PTD013;hCG_20867	RWD domain-containing protein 1;RWD domain containing 1 isoform b	Q9H446;A8K3W2;A8MT24		0.88906
KIAA0409;hucep-1	Cerebral protein 1	O43159		0.88856
FNTA	Protein farnesyltransferase/geranylgeranyltransferase type-1 subunit alpha;farnesyltransferase, CAAX box, alpha isoform c;farnesyltransferase, CAAX box, alpha isoform b;26 kDa protein	P49354;Q53XJ9;A6NJW0;A8MVX8;B3KVN2	0.91791	0.88548	0.86131
VARS;DAAP-21F2.2-001;DAMC-117B11.3-001;G7A;VARS2	Valyl-tRNA synthetase;Valyl-tRNA synthetase	B0V043;P26640;B0V1N1	0.85507	1.0637	0.74559
DDX56;DDX21;NOH61	Probable ATP-dependent RNA helicase DDX56	Q9NY93;A4D2K9;Q53HB9		1.2237	0.55245
RPS24	Isoform 1 of 40S ribosomal protein S24;15 kDa protein;Isoform 2 of 40S ribosomal protein S24	P62847-1;P62847;Q5T0P7;Q7Z3D1;P62847-2;Q5T0P8	0.9029	0.84463	0.91644
IFIT1;G10P1;IFI56;IFNAI1	Interferon-induced protein with tetratricopeptide repeats 1	P09914;B3KS50;Q5T7J1	1.01	0.80277	0.85106
STK4;MST1	Isoform 1 of Serine/threonine-protein kinase 4;Isoform 2 of Serine/threonine-protein kinase 4	Q13043-1;Q13043;B2RCR8;Q59FZ4;Q13043-2;A0PJ51;Q5H9T5;Q9BS84	0.82927	0.88979	0.94446
KPNA3;QIP2	Importin subunit alpha-3	O00505;Q53F09;Q5JVM9;Q8IYQ9	0.87734	0.9133	0.87258
SF3B5;SF3B10	Splicing factor 3B subunit 5	Q9BWJ5;B2R568	0.91196	0.86289
MPHOSPH10;MPP10	U3 small nucleolar ribonucleoprotein protein MPP10	O00566;B3KPV5	0.8825	0.9426	0.83674
SARS;RP11-352P4.2-004;SERS	Seryl-tRNA synthetase;Seryl-tRNA synthetase, cytoplasmic	Q5T5C7;P49591;B2R6Y9;Q0VGA5;Q53HA4	0.84578	0.96646	0.84852
AP3S1;CLAPS3;hCG_1986065	AP-3 complex subunit sigma-1;Putative uncharacterized protein	Q92572;B2R4I8;Q53XL4;B2RXK2	0.87633	0.88704	0.89686
ARPC1A;SOP2L	Actin-related protein 2/3 complex subunit 1A	Q92747;A4D276;Q53GB6;Q59GQ0;Q75MY0		0.8866
FAM120A;C9orf10;KIAA0183	Isoform A of Constitutive coactivator of PPAR-gamma-like protein 1;Isoform D of Constitutive coactivator of PPAR-gamma-like protein 1;Isoform E of Constitutive coactivator of PPAR-gamma-like protein 1;Isoform B of Constitutive coactivator of PPAR-gamma-like protein 1	Q9NZB2-1;Q9NZB2;Q9NZB2-4;Q9NZB2-5;Q9NZB2-2	0.87873	0.87406	0.90691
COMMD9;HSPC166	COMM domain-containing protein 9;COMM domain containing 9 isoform 2	Q9P000;B4DIH0;B4DQW0;Q53FR9		0.8865
MRPS15;RPMS15;DC37	28S ribosomal protein S15, mitochondrial;cDNA FLJ56752, highly similar to 28S ribosomal protein S15, mitochondrial	P82914;B2RD82;B4DYW3;Q59EA6	0.69854	1.0736
COMMD8;MDS022	Putative uncharacterized protein COMMD8;COMM domain-containing protein 8	A8MQB6;Q9NX08		0.93575	0.83512
TP53RK;C20orf64;PRPK;RP1-28H20.1-002	TP53-regulating kinase;TP53 regulating kinase	Q96S44;B2RCM6;B3KU44;Q5JZ02	0.92955	0.997	0.72952
MTHFD1L;FTHFSDC1	Isoform 1 of Monofunctional C1-tetrahydrofolate synthase, mitochondrial	Q6UB35-1;Q6UB35;B2RD24	0.94481	0.84788	0.86297
LARS2;KIAA0028	Probable leucyl-tRNA synthetase, mitochondrial	Q15031;Q9BQR0			0.88452
LARP1;KIAA0731;LARP	Isoform 1 of La-related protein 1;Isoform 2 of La-related protein 1;Isoform 3 of La-related protein 1	Q6PKG0-1;Q6PKG0;Q6PKG0-2;Q6PKG0-3	0.91058	0.86723	0.87459
ERH	Enhancer of rudimentary homolog	P84090;B2R5H2	0.91547	0.85256
CTNNBL1;C20orf33;PP8304	Isoform 1 of Beta-catenin-like protein 1;Isoform 2 of Beta-catenin-like protein 1;Isoform 3 of Beta-catenin-like protein 1	Q8WYA6-1;Q8WYA6;B4DE16;Q0VAM0;Q8WYA6-2;Q8WYA6-3	0.85598	0.91585	0.88018
OAS3;P/OKcl.4	2'-5'oligoadenylate synthetase 3;2'-5'-oligoadenylate synthetase 3	A8KA84;Q2HJ14;Q9Y6K5		0.93917	0.82869
C7orf20;CGI-20	Protein of unknown function DUF410 family protein;36 kDa protein;Isoform 2 of UPF0363 protein C7orf20;19 kDa protein;17 kDa protein	Q7L5D6-1;Q7L5D6;Q7L5D6-2		0.88323
MRPS25;RPMS25	28S ribosomal protein S25, mitochondrial;cDNA FLJ59193, highly similar to Mitochondrial 28S ribosomal protein S25;16 kDa protein;cDNA FLJ54123, moderately similar to Mitochondrial 28S ribosomal protein S25;Mitochondrial ribosomal protein S25	P82663;B4DFJ5;B4DQG6;Q96Q22		0.86064	0.9056
MRPL43;RP11-108L7.13-006;RP11-108L7.13-008;RP11-108L7.13-009	mitochondrial ribosomal protein L43 isoform d;Isoform 1 of 39S ribosomal protein L43, mitochondrial;Isoform 2 of 39S ribosomal protein L43, mitochondrial;Mitochondrial ribosomal protein L43;Mitochondrial ribosomal protein L43;Isoform 3 of 39S ribosomal protein L43, mitochondrial;Isoform 4 of 39S ribosomal protein L43, mitochondrial;Putative uncharacterized protein MRPL43	B1AL06;Q8N983-1;Q8N983;Q8N983-2;B1AL07;B1AL05;B1AL08;Q8N983-3;B1AL09;Q8N983-4;A8K4V4;B1AL10;B5MDQ2	1.0061	0.77905	0.8641
C10orf119	Isoform 1 of UPF0557 protein C10orf119;Isoform 2 of UPF0557 protein C10orf119	Q9BTE3-1;Q9BTE3;Q9BTE3-2;B3KSP7	0.6008	1.1641
SNRPB;COD;SNRPB1;SNRPN;HCERN3;SMN	Isoform SM-B1 of Small nuclear ribonucleoprotein-associated proteins B and B';Putative uncharacterized protein SNRPB;30 kDa protein;cDNA FLJ41124 fis, clone BRACE2014850, highly similar to Small nuclear ribonucleoprotein-associated protein N;Small nuclear ribonucleoprotein B';Isoform SM-B' of Small nuclear ribonucleoprotein-associated proteins B and B';Small nuclear ribonucleoprotein-associated p…	P14678-3;P14678;A8MT02;Q15182;B3KVR1;Q53HE7;Q9UIS4;P14678-1;Q5XPV6;Q6IB35;Q6PKB4;P63162;Q6LBS1;Q9UKR4;P14678-2;B4DVD6;Q66K91	0.82127	0.96066	0.865
ETF1;ERF1;RF1;SUP45L1	Eukaryotic peptide chain release factor subunit 1	P62495;B2R6B4;Q96CG1	0.89777	0.94953	0.79902
RBM7	31 kDa protein;RNA-binding protein 7;Putative uncharacterized protein (Fragment)	Q9Y580;B2R6K8;Q6IRX3;Q59EQ8		0.88162
FBXO6;FBG2;FBX6;RP3-330O12.3-003	F-box only protein 6;F-box protein 6	Q9NRD1;B2RC88;B1AK42		0.83289	0.93017
OVCA2	Ovarian cancer-associated gene 2 protein	Q8WZ82		0.95236	0.81031
C11orf2;ANG2;PP5382	Isoform 1 of Uncharacterized protein C11orf2;Isoform 2 of Uncharacterized protein C11orf2	Q9UID3-1;Q9UID3;Q9UID3-2		0.8811
KIAA0082	FtsJ methyltransferase domain-containing protein 2	Q8N1G2;A8K949	0.90831	0.85046	0.88447
PFDN6;HKE2;PFD6	Prefoldin subunit 6	O15212;Q5STK2	0.97425	0.78776
HSPA14;HSP60;HSP70L1	Heat shock 70 kDa protein 14	Q0VDF9;A8K8F8;B0YIY9;B4DYI5		0.88048
DDX58	Isoform 1 of Probable ATP-dependent RNA helicase DDX58;Isoform 2 of Probable ATP-dependent RNA helicase DDX58	O95786-1;O95786;A2RU81;B3KWW1;Q3B797;O95786-2;A2A376;B3KN51;B4DWT9			0.88026
RAB27A;RAB27	Isoform Long of Ras-related protein Rab-27A;Isoform Short of Ras-related protein Rab-27A	P51159-1;P51159;A2RU94;Q6IAS8;P51159-2		0.86119	0.89844
SNX3	Isoform 1 of Sorting nexin-3;Isoform 4 of Sorting nexin-3;Isoform 2 of Sorting nexin-3	O60493-1;O60493;A8K0B1;Q4TT31;O60493-4;O60493-2;Q4TT29	0.84601	0.86439	0.92862
NUP62	Nuclear pore glycoprotein p62	P37198;B3KWU5;Q8WYU3	0.79831	1.0027	0.83796
ARHGEF7;COOL1;KIAA0142;P85SPR;PAK3BP;PIXB;Nbla10314;RP11-494P5.1-001	Isoform 5 of Rho guanine nucleotide exchange factor 7;Rho guanine nucleotide exchange factor (GEF) 7;Isoform 1 of Rho guanine nucleotide exchange factor 7;Isoform 4 of Rho guanine nucleotide exchange factor 7;Isoform 3 of Rho guanine nucleotide exchange factor 7;Isoform 2 of Rho guanine nucleotide exchange factor 7;Isoform 6 of Rho guanine nucleotide exchange factor 7;78 kDa protein	Q14155-5;Q14155;B1ALK7;Q14155-1;Q5ZEZ2;Q14155-4;B1ALK5;Q5W9H1;Q14155-3;Q14155-2;Q14155-6;Q5ZEZ3	0.7987	1.1195	0.72071
RPS16	40S ribosomal protein S16;cDNA FLJ56786, moderately similar to 40S ribosomal protein S16	P62249;B2RDD5;B4DP32	0.8563	0.87131	0.91081
MRPL2;CGI-22	39S ribosomal protein L2, mitochondrial;cDNA FLJ57498, highly similar to Homo sapiens mitochondrial ribosomal protein L2 (MRPL2), mRNA	Q5T653;B2RC56;B4DVE2		0.87929
EXOSC10;PMSCL;PMSCL2	Isoform 1 of Exosome component 10;Isoform 2 of Exosome component 10;cDNA FLJ60634, highly similar to Exosome component 10	Q01780-1;Q01780;B1AKQ0;Q01780-2;B4DFE4;Q59G73;B4DKG8	0.75608	0.9413	0.93959
WDR36	WD repeat-containing protein 36	Q8NI36;A2RUS4;Q68E02	0.75425	1.0037
PAFAH1B3;PAFAHG	Platelet-activating factor acetylhydrolase IB subunit gamma	Q15102;Q53X88	0.81905	0.8963	0.92145
MUT	Methylmalonyl-CoA mutase, mitochondrial	P22033;A8K953;B2R6K1;Q59HB4		0.87889
BUB3;hCG_41421	Mitotic checkpoint protein BUB3;budding uninhibited by benzimidazoles 3 isoform b;Putative uncharacterized protein BUB3	O43684;B2R6E7;B4DDM6;A6NJ42;B5MCE8	0.84837	0.8998	0.88849
RPLP1;RRP1	60S acidic ribosomal protein P1	P05386;Q6FG99;Q6ICQ4;Q7Z612	0.89032	0.91974	0.82656
AHCY;SAHH	Adenosylhomocysteinase	P23526;A8K307;B3KUN3;Q1RMG2	0.89242	0.88159	0.86128
PNPT1;PNPASE	Polyribonucleotide nucleotidyltransferase 1, mitochondrial;59 kDa protein	Q8TCS8	0.85416	0.92617	0.85461
RQCD1;RCD1	Cell differentiation protein RCD1 homolog;Similar to Protein RCD1 homolog	Q92600;B2RE59;B2RPI0;B4DJE1;B5MDQ4		0.90279	0.85322
MYBBP1A;P160	Isoform 2 of Myb-binding protein 1A;Isoform 1 of Myb-binding protein 1A;cDNA FLJ57836, highly similar to Myb-binding protein 1A	Q9BQG0-2;Q9BQG0;Q9BQG0-1;B4DE42;B4DZZ1	0.88781	0.89082	0.85463
FKBP15;KIAA0674	Isoform 1 of FK506-binding protein 15;Isoform 2 of FK506-binding protein 15	Q5T1M5-1;Q5T1M5;B4DVS2;B4DZS8;Q5T1M5-2	0.92692	0.66884	1.0369
RBMX;HNRPG;RBMXP1	Heterogeneous nuclear ribonucleoprotein G;cDNA FLJ38696 fis, clone KIDNE2001931, highly similar to HETEROGENEOUS NUCLEAR RIBONUCLEOPROTEIN G	P38159;B3KRG5;B4E352;Q8N8Y7	0.75901	1.0135	0.85999
USP39;CGI-21;HSPC332;PRO2855	U4/U6.U5 tri-snRNP-associated protein 2	Q53GS9;A8K086;B3KM40;B3KMG1;B3KPG7;B4DHT4	0.81237	0.9426
MRE11A;HNGS1;MRE11	cDNA FLJ38069 fis, clone CTONG2015434, highly similar to DOUBLE-STRAND BREAK REPAIR PROTEIN MRE11A;Isoform 2 of Double-strand break repair protein MRE11A	P49959-1;P49959;B3KTC7;P49959-2;Q05D78;Q9BS79	0.83225	0.92133
FARSA;FARS;FARSL;FARSLA	Phenylalanyl-tRNA synthetase alpha chain;cDNA FLJ50378, highly similar to Phenylalanyl-tRNA synthetase alpha chain	Q9Y285;Q6IBR2;B4E363	0.93048	0.8348	0.86476
COPG2	Coatomer subunit gamma-2	Q9UBF2;B3KND4;Q2NLA0;Q9H279;Q9H9B7;Q9NUP3		0.88141	0.87143
WDR75	WD repeat-containing protein 75	Q8IWA0;A8K330;Q05D27	0.74292	1.0086
HEATR1;BAP28;RP11-385F5.3-002	HEAT repeat-containing protein 1;HEAT repeat containing 1	Q9H583;A2VDI1;B2RWN5;B4E263;Q8N7L7;Q96ES5;B3KWS1;Q5T3Q7	0.81955	0.96299	0.84346
AP2B1;ADTB2;CLAPB1;hCG_1992160	Isoform 2 of AP-2 complex subunit beta-1;Isoform 1 of AP-2 complex subunit beta-1;Adaptor-related protein complex 2, beta 1 subunit, isoform CRA_f	P63010-2;P63010;A8K0G3;A8K916;B4DWG4;B4E261;Q68DI0;Q96EL6;P63010-1;Q7Z451	0.91717	0.96173	0.74552
CLNS1A;CLCI;ICLN	Methylosome subunit pICln	P54105;B2RCS9;Q9P1H0		0.78583	0.96332
FAU	ubiquitin-like protein fubi and ribosomal protein S30 precursor;40S ribosomal protein S30	P35544;P62861	0.92985	0.7645	0.92821
UQCC;BZFB;C20orf44;RP4-614O4.7-018;RP4-614O4.7-007;RP4-614O4.7-006	Isoform 1 of Ubiquinol-cytochrome c reductase complex chaperone CBP3 homolog;34 kDa protein;Isoform 2 of Ubiquinol-cytochrome c reductase complex chaperone CBP3 homolog;Isoform 4 of Ubiquinol-cytochrome c reductase complex chaperone CBP3 homolog;Chromosome 20 open reading frame 44;Chromosome 20 open reading frame 44;Chromosome 20 open reading frame 44;Chromosome 20 open reading frame 44;Isoform 3…	Q9NVA1-1;Q9NVA1;Q3KRB6;Q9NVA1-2;B5MCA6;Q9NVA1-4;A6NJA7;B1AKV3;B1AKV5;B5MCQ8;B1AKV6;B1AKV4;B5MCM4;Q9NVA1-3	0.9183	0.93602	0.76491
DDX17;RP3-434P1.4-009;RP3-434P1.4-005	DEAD box polypeptide 17 isoform 1;Isoform 3 of Probable ATP-dependent RNA helicase DDX17;Isoform 2 of Probable ATP-dependent RNA helicase DDX17;DEAD (Asp-Glu-Ala-Asp) box polypeptide 17;cDNA FLJ58652, highly similar to Probable ATP-dependent RNA helicase DDX17	Q92841-1;Q92841;Q92841-3;B1AHM0;Q59F66;Q92841-2;B1AHM1;B1AHM2;B4DZQ7	0.78536	0.94839	0.88507
RDX;hCG_39182	Radixin, isoform CRA_a;Radixin	A7YIJ8;A7YIK3;P35241;B0YJ88;Q05CU6;Q6PKD3;Q9NST9		0.89933	0.84539
LRPPRC;LRP130	Leucine-rich PPR motif-containing protein, mitochondrial	P42704;B4DSR0	0.93181	0.84921	0.83536
MCM7;CDC47;MCM2;hCG_2023614;tcag7.648	Isoform 1 of DNA replication licensing factor MCM7;minichromosome maintenance complex component 7 isoform 2	P33993-1;P33993;A4D2A1;B2RBA6;B3KUD7;B4DDF5;A4D2A2;Q9H4N9	0.85445	0.87274	0.88903
MTHFD1;MTHFC;MTHFD	C-1-tetrahydrofolate synthase, cytoplasmic	P11586;B2R5Y2	0.8536	0.88234	0.88009
MPP6;VAM1	MAGUK p55 subfamily member 6	Q9NZW5;A4D157			0.87174
NBEAL2;KIAA0540;UNQ253/PRO290	Isoform 1 of Neurobeachin-like protein 2;Isoform 2 of Neurobeachin-like protein 2;Isoform 4 of Neurobeachin-like protein 2	Q6ZNJ1-1;Q6ZNJ1;Q6ZNJ1-2;B4DDY6;B4DVX0;Q6ZNJ1-4	0.87158
MRPL27;HSPC250	Putative uncharacterized protein MRPL27 (Fragment);39S ribosomal protein L27, mitochondrial;11 kDa protein;10 kDa protein;10 kDa protein	A8MUX6;Q9P0M9;B2RE14	1.045	0.81249	0.7572
RPS18;D6S218E	40S ribosomal protein S18;similar to ribosomal protein;17 kDa protein;similar to ribosomal protein S18	P62269;Q5SUJ3	0.84696	0.89074	0.87634
IDI1	isopentenyl-diphosphate delta isomerase	Q13907;B4E155	0.80698	0.89823	0.90747
RIC8A	resistance to inhibitors of cholinesterase 8 homolog A;Isoform 1 of Synembryn-A;Isoform 2 of Synembryn-A	Q9NPQ8-3;Q9NPQ8;Q9NPQ8-1;Q9NPQ8-2	0.86904	0.88052	0.86296
CXorf26	UPF0368 protein Cxorf26;Putative uncharacterized protein CXorf26	Q9BVG4;Q9P0N4;A6NDF3	0.93325	0.83391	0.84506
SAR1A;SAR1;SARA;SARA1;RP11-367H5.4-004	GTP-binding protein SAR1a;SAR1 gene homolog A	Q9NR31;B2R679;B4DQ19;Q5SQT9;Q6FID4;Q8NG23;Q5SQT8	0.87404	0.88288	0.85416
C16orf80	UPF0468 protein C16orf80;cDNA FLJ58848, highly similar to Homo sapiens transcription factor IIB	Q9Y6A4;B4DN94		0.91367	0.82702
KIAA1797	Uncharacterized protein KIAA1797	Q5VW36;B3KNV9	0.86782	0.89337	0.84874
MKI67IP;NIFK;NOPP34	MKI67 FHA domain-interacting nucleolar phosphoprotein;cDNA FLJ57495, highly similar to MKI67 FHA domain-interacting nucleolar phosphoprotein	Q9BYG3;A8K788;B4DSM4	0.77895	0.98064	0.84713
LCK	Isoform 3 of Proto-oncogene tyrosine-protein kinase LCK;Proto-oncogene tyrosine-protein kinase LCK;cDNA FLJ56184, highly similar to Proto-oncogene tyrosine-protein kinase LCK;Isoform Short of Proto-oncogene tyrosine-protein kinase LCK	P06239-3;P06239;Q573B4;P06239-1;B3KUV3;B4DZS7;Q7RTZ3;P06239-2	1.0321	0.85824	0.71599
PPP6C;PPP6	protein phosphatase 6, catalytic subunit isoform a;Serine/threonine-protein phosphatase 6;protein phosphatase 6, catalytic subunit isoform c	O00743;B2R5V6	0.90603	0.80606	0.89423
PCNA	Proliferating cell nuclear antigen	P12004;B2R897;B4DUA2;Q6FHF5;Q6FI35;Q7Z6A1;Q7Z6A2;Q7Z6A3	0.86836	0.87341	0.86449
NOL6	Isoform 1 of Nucleolar protein 6;Isoform 4 of Nucleolar protein 6;Isoform 2 of Nucleolar protein 6;Isoform 3 of Nucleolar protein 6	Q9H6R4-1;Q9H6R4;Q9H6R4-4;B3KPN5;B4DF80;Q9H6R4-2;Q9H6R4-3	0.87221	0.86642	0.86717
CHD7;KIAA1416	Isoform 1 of Chromodomain-helicase-DNA-binding protein 7	Q9P2D1-1;Q9P2D1;B4DIS0;Q6ZWF9			0.86845
METTL11A;C9orf32;AD-003	Protein of unknown function DUF858, methyltransferase-like family protein	Q9BV86;A8K4J2;A8K8G7	0.88057	0.84882	0.87546
CTR9;KIAA0155;SH2BP1	RNA polymerase-associated protein CTR9 homolog	Q6PD62;A8K6X9		0.86817
RPL7L1	60S ribosomal protein L7-like 1;similar to ribosomal protein L7-like 1	Q6DKI1;A8K5J5;A8K7D4;B3KMP5	0.83044	1.0076	0.76645
TNPO3;IPO12	Isoform 2 of Transportin-3;Isoform 3 of Transportin-3;Putative uncharacterized protein TNPO3;Isoform 1 of Transportin-3	Q9Y5L0-2;Q9Y5L0;B3KM69;B3KMX1;Q9Y5L0-3;B5MD86;Q9Y5L0-1;B2R6H7	0.89626	0.81869	0.88872
SNW1;SKIIP;SKIP	cDNA FLJ59238, highly similar to SNW domain-containing protein 1;SNW domain-containing protein 1	B4DEG7;Q13573;A8K8A9;B4DY36;Q0D2M5;Q6I9S2;Q6P151;Q9ULA6	0.7792	0.95652
PTPN1;PTP1B	Tyrosine-protein phosphatase non-receptor type 1	P18031;A8K3M3;B4DSN5	0.95089	0.84731	0.80484
RPL26;RPL26L1;RPL26P1	Putative uncharacterized protein RPL26P6;60S ribosomal protein L26;13 kDa protein;60S ribosomal protein L26-like 1;hypothetical protein LOC653147	A6NE05;P61254;B2R4F0;Q6IBH6;Q9UNX3;B3KY82	0.85251	0.83336	0.91594
RPL6;TXREB1	60S ribosomal protein L6;60S ribosomal protein L6;60S ribosomal protein L6;similar to Ribosomal protein L6 isoform 7;similar to DNA-binding protein TAXREB107 isoform 1;similar to DNA-binding protein TAXREB107 isoform 2	B2R4K7;Q9HBB3;Q02878;B4DRX3;Q8N5Z7;Q8TBK5	0.83151	0.93806	0.83187
NAT13;MAK3;NAT5	Isoform 1 of N-acetyltransferase 13;Isoform 2 of N-acetyltransferase 13	Q9GZZ1-1;Q9GZZ1;B0AZT5;Q9GZZ1-2	0.87043	0.88484	0.84445
IRF4;MUM1	Isoform 1 of Interferon regulatory factor 4;Isoform 2 of Interferon regulatory factor 4;ICSAT transcription factor (Fragment)	Q15306-1;Q15306;Q15306-2;Q99419	0.70466	1.3746	0.51865
RPL3;OK/SW-cl.32;hCG_2015191	60S ribosomal protein L3;ribosomal protein L3 isoform b;35 kDa protein;Ribosomal protein L3, isoform CRA_b;Protein;Putative uncharacterized protein RPL3	P39023;B2RDV9;Q96QL0;A6NHB7;B3KS36;B4DN06;Q49AJ9;Q8TBW1;Q9BT63;Q9NY85;B5MCW2	0.83573	0.88966	0.87176
ALDH1B1;ALDH5;ALDHX	Aldehyde dehydrogenase X, mitochondrial	P30837;B2R8F0;B4DLJ0	0.87834	0.85299
GIGYF2;KIAA0642;PERQ2;TNRC15	Isoform 2 of PERQ amino acid-rich with GYF domain-containing protein 2;Isoform 1 of PERQ amino acid-rich with GYF domain-containing protein 2;GRB10 interacting GYF protein 2 isoform c;cDNA FLJ58310, highly similar to Homo sapiens trinucleotide repeat containing 15 (TNRC15), mRNA	Q6Y7W6-3;Q6Y7W6;A6H8W4;Q6Y7W6-1;B4DRT8;B4DLU7;Q7Z6I7;B4DZM1	0.85035	1.0375	0.7089
EIF3K;EIF3S12;ARG134;HSPC029;MSTP001;PTD001	Eukaryotic translation initiation factor 3 subunit K	Q9UBQ5;A8K0I9;B4DQ48;B4DVD7	0.87673	0.87114	0.84854
RPA2;REPA2;RPA32;RPA34;RP4-547C9.3-003	Isoform 3 of Replication protein A 32 kDa subunit;Isoform 2 of Replication protein A 32 kDa subunit;Isoform 1 of Replication protein A 32 kDa subunit;Replication protein A2, 32kDa	P15927-3;P15927;P15927-2;B2R7E8;P15927-1;B4DQD9;B4DUL2;Q5TEJ7	0.82873	1.0009	0.76654
MRPS16;RPMS16;CGI-132	28S ribosomal protein S16, mitochondrial;cDNA FLJ58442, highly similar to 28S ribosomal protein S16, mitochondrial;Putative uncharacterized protein MRPS16	Q9Y3D3;B4E032;A6ND22	0.97466	0.75509
ARHGEF2;KIAA0651;LFP40;RP11-336K24.3-004	Rho/rac guanine nucleotide exchange factor 2;Rho/rac guanine nucleotide exchange factor (GEF) 2;Isoform 1 of Rho guanine nucleotide exchange factor 2;Isoform 2 of Rho guanine nucleotide exchange factor 2	Q92974-3;Q92974;Q5VY93;Q92974-1;Q92974-2	0.73994	1.0112	0.8425
SSBP1;SSBP	Single-stranded DNA-binding protein, mitochondrial	Q04837;A4D1U3;Q567R6;Q75MV9	0.82445	0.98853	0.78039
ACIN1;ACINUS;KIAA0670	Isoform 1 of Apoptotic chromatin condensation inducer in the nucleus;cDNA FLJ50838, highly similar to Apoptotic chromatin condensation inducer in thenucleus (Fragment);Isoform 2 of Apoptotic chromatin condensation inducer in the nucleus;Isoform 3 of Apoptotic chromatin condensation inducer in the nucleus	Q9UKV3-1;Q9UKV3;B2RTT4;Q69YJ6;B4DQZ7;Q9UKV3-2;Q9UKV3-3		0.98492	0.74358
TBCB;CG22;CKAP1	Tubulin folding cofactor B;Putative uncharacterized protein TBCB	Q99426;Q6FGY5;A8MVD5		0.81367	0.91452
[truncated: 767 more rows]
